# Supplementary material for: CrisPam: SNP-Derived PAM Analysis Tool for Allele-Specific Targeting of Genetic Variants Using CRISPR-Cas Systems
Source: Front Genet. 2020 Aug 18;11:851. doi: 10.3389/fgene.2020.00851 (PMC7461778; doi:10.3389/fgene.2020.00851)
Supplement: Supplementary file 1 [file Data_Sheet_1.XLSX]

## Sheet: S File1 - CrisPam DB_CSV
rsID	Gene Name	Gene ID	Clinical Sig.	Associated Condition	WT Sequence	Variants	Base Replacement	NGG	NGCG	NGAG	NGAN	NNGRRT	NNNRRT	NNNNGATT	NNRGAAW	NAAAAC	NNNVRYM	TTTV	NANG	NNGTGA	TTN	NRRH	NRCH	TATV	TYCV	TGTV	VTTV	TTV	TTTT	TTCN	NGGN	NG	NRTH	NGGNG
rs763820204	AAAS	8086	pathogenic		GGCAGATCTGTCTGAGACAACAATA<C>AGACACCAGATGGTGAGGAGAGGTG	T	From C to T																	AsCas12a RVR TATV on 23 AsCas12a RVR comp. TATV on 24									SpCas9-NRTH NRTH on 23
rs773601814	AAAS	8086	pathogenic	Glucocorticoid deficiency with achalasia (AAA)	TAATTTGCTTTTCTCTGGCTCAGAG<T>CTGGGAGGCCCAGATGTGGACTTGT	C	From T to C	SpCas9 comp. NGG on 23											SpCas9-NG comp. NANG on 22				SpCas9-NRCH NRCH on 23								SpCas9-NRTH comp. NGGN on 23 SpCas9-NRCH comp. NGGN on 23	xCas9 comp. NG on 24 SpCas9-NG comp. NG on 24
rs121918549_0	AAAS	8086	pathogenic	Glucocorticoid deficiency with achalasia (AAA)	GTTCCCTCCTCCACCGCCTCGGGGT<C>AAGTCACCCTATATGAGCACAATAA	A	From C to A											LbCas12a & AsCas12a comp. TTTV on 23				SpCas9-NRRH NRRH on 24						FnCas12a comp. TTV on 24
rs121918549_1	AAAS	8086	pathogenic		GTTCCCTCCTCCACCGCCTCGGGGT<C>AAGTCACCCTATATGAGCACAATAA	T	From C to T																				enAsCas12a VTTV on 23	FnCas12a TTV on 24
rs121918550	AAAS	8086	pathogenic.likely-pathogenic	Glucocorticoid deficiency with achalasia (AAA). Hyperreflexia (HRX). Spastic paraparesis. Babinski sign. Inborn genetic diseases	CAGTGGGGGGCGGCTGCTCTCAGCT<T>CACCCGTGGATGCTGCTATCCGGGT	C	From T to C	SpCas9 comp. NGG on 23		EQR SpCas9 comp. NGAG on 24	VQR SpCas9 comp. NGAN on 24																				SpCas9-NRTH comp. NGGN on 23 SpCas9-NRCH comp. NGGN on 23	xCas9 comp. NG on 24 SpCas9-NG comp. NG on 24		St3Cas9 comp. NGGNG on 23
rs1017700992	AAAS	8086	likely-pathogenic		TGGCACCCCCACACCAACAAGTTTG<C>AGTGGCCCTGCTAGATGACTCAGTC	T	From C to T																			enAsCas12a TGTV on 23							SpCas9-NRTH NRTH on 23
rs121918547	AAAS	8086	pathogenic	Glucocorticoid deficiency with achalasia (AAA)	GGCTACCACTCCTTCAGCTGTCTTT<C>GGTGAGTGGGACAAGGATGGAGGGA	T	From C to T											LbCas12a & AsCas12a TTTV on 23										FnCas12a TTV on 24	enAsCas12a TTTT on 22
rs766542823_0	AAAS	8086	pathogenic		GAGGTGGGGTGACCAACCTGCTCTG<G>TCCCCAGACGGCAGCAAAATCCTGG	A	From G to A				VQR SpCas9 NGAN on 23	SaCas9 comp. NNGRRT on 20	KKH SaCas9 comp. NNNRRT on 20																				SpCas9-NRTH comp. NRTH on 23
rs766542823_1	AAAS	8086	pathogenic		GAGGTGGGGTGACCAACCTGCTCTG<G>TCCCCAGACGGCAGCAAAATCCTGG	T	From G to T										CjCas9 comp. NNNVRYM on 21					SpCas9-NRRH comp. NRRH on 23	SpCas9-NRCH comp. NRCH on 24		AsCas12a RR TYCV on 25		enAsCas12a VTTV on 24	FnCas12a TTV on 25		enAsCas12a TTCN on 25 Cas12e (CasX) TTCN on 25			SpCas9-NRTH NRTH on 23
rs121918551	AAAS	8086	pathogenic	Glucocorticoid deficiency with achalasia (AAA)	ACAGGATGGTAAACCAGTCATCCTC<C>TTTTTCGCACTCGAAACAGCCCTGT	T	From C to T															SpCas9-NRRH comp. NRRH on 22							enAsCas12a TTTT on 25
rs200564757_0	AAGAB	79719	pathogenic		TTTGCATATTATTTTAGGTATAAAC<C>GACAAAAAGCTCAAGAATGGTGCAT	A	From C to A															SpCas9-NRRH NRRH on 24
rs746488412	AAGAB	79719	pathogenic	Keratosis palmoplantaris papulosa (PPKP1A)	CTTCCCAGAATCTACAGGAGTAAAG<C>GAATTGTCCAAGCCCTGAATGCCAA	T	From C to T						KKH SaCas9 NNNRRT on 20							SpCas9 (From Strep. past.) NNGTGA on 22
rs746800707	AAR2	25980	likely-pathogenic		CTCCATGAAGCACACCAAGGACCGC<G>TGGGGCAGAATCTACCCCGCTGTGG	T	From G to T															SpCas9-NRRH comp. NRRH on 24	SpCas9-NRCH NRCH on 22				enAsCas12a VTTV on 24	FnCas12a TTV on 25
rs387906792	AARS	16	pathogenic	Charcot-Marie-Tooth disease. type 2N (CMT2N)	CATGGCAAAGCTGAGCAGAGCTGCC<A>ATACCCAGAAGTGCATCCGGGCTGG	T	From A to T												SpCas9-NG comp. NANG on 24					AsCas12a RVR TATV on 25 AsCas12a RVR comp. TATV on 22
rs143370729	AARS	16	uncertain-significance.pathogenic	Epileptic encephalopathy. early infantile. 29 (EIEE29). Charcot-Marie-Tooth disease. type 2	AGAAGCCATTGCCAAGGGTATCCGG<A>GGATTGTGGCTGTCACAGGTGCCGA	G	From A to G	SpCas9 NGG on 23																	AsCas12a RR comp. TYCV on 22						SpCas9-NRRH NGGN on 23 SpCas9-NRTH NGGN on 23 SpCas9-NRCH NGGN on 23 SpCas9-NRRH NGGN on 24 SpCas9-NRTH NGGN on 24 SpCas9-NRCH NGGN on 24	xCas9 NG on 24 SpCas9-NG NG on 24		St3Cas9 NGGNG on 23
rs797044801	AARS	16	pathogenic	Charcot-Marie-Tooth disease	TTGAAGAAATGTCTCTCTGTCATGG<A>AGCCAAAGTGAAGGCTCAGACTGCT	C	From A to C										CjCas9 NNNVRYM on 20						SpCas9-NRCH NRCH on 23 SpCas9-NRCH comp. NRCH on 24									xCas9 comp. NG on 24 SpCas9-NG comp. NG on 24
rs786205157	AARS	16	pathogenic.likely-pathogenic	Epileptic encephalopathy. early infantile. 29 (EIEE29)	CAGAAGTGCATCCGGGCTGGGGGCA<A>ACATAATGACCTGGACGATGTGGGC	C	From A to C										CjCas9 NNNVRYM on 20						SpCas9-NRCH NRCH on 23			enAsCas12a comp. TGTV on 22 enAsCas12a comp. TGTV on 24						xCas9 comp. NG on 24 SpCas9-NG comp. NG on 24
rs1064795664	AARS	16	likely-pathogenic		CAGATATGTGTTGAGACGGATTCTC<C>GCCGAGCTGTCCGATACGCCCATGA	T	From C to T										CjCas9 comp. NNNVRYM on 19						SpCas9-NRCH comp. NRCH on 22
rs763757370	AARS	16	likely-pathogenic.uncertain-significance		TGGGGGCAAACATAATGACCTGGAC<G>ATGTGGGCAAGGATGTCTATCATCA	A	From G to A										CjCas9 NNNVRYM on 19						SpCas9-NRCH NRCH on 22			enAsCas12a comp. TGTV on 25	enAsCas12a comp. VTTV on 23	FnCas12a comp. TTV on 24
rs1480620711	AARS	16	likely-pathogenic		ACTTCTGTTGAGTTCTGTGGGGGAA<C>GTGAGTACTGCAGAGGGGCAGAGTA	T	From C to T					SaCas9 NNGRRT on 20	KKH SaCas9 NNNRRT on 20		St1Cas9 NNRGAAW on 19		CjCas9 comp. NNNVRYM on 19						SpCas9-NRCH comp. NRCH on 22			enAsCas12a TGTV on 25
rs267606621	AARS	16	pathogenic	Charcot-Marie-Tooth disease. type 2N (CMT2N). Charcot-Marie-Tooth disease. type 2. Charcot-Marie-Tooth disease	AGATATGTGTTGAGACGGATTCTCC<G>CCGAGCTGTCCGATACGCCCATGAA	A	From G to A						KKH SaCas9 comp. NNNRRT on 20
rs775065697	AARS2	57505	likely-pathogenic		TGACCTCAGGTTTACCCAGACCCTG<T>GCGGGTGGTATCAGTGGGGGTGCCC	C	From T to C		VRER SpCas9 NGCG on 23 VRER SpCas9 comp. NGCG on 22																							xCas9 comp. NG on 24 SpCas9-NG comp. NG on 24
rs200105202	AARS2	57505	pathogenic		TTTTCTCCCCAGGGTGCCTGCTAGC<C>GTGTGCTTTCCTTTGGACCACAAGA	T	From C to T										CjCas9 comp. NNNVRYM on 19						SpCas9-NRCH comp. NRCH on 22			enAsCas12a TGTV on 25
rs1085307969	AARS2	57505	likely-pathogenic		GGCACTACCCGCCTGCTGGCCGTCA<C>TGGGGAGCAGGCCCAGCAGGTCAGC	T	From C to T																				enAsCas12a VTTV on 24	FnCas12a TTV on 25					SpCas9-NRTH NRTH on 23
rs863223862	AARS2	57505	likely-pathogenic		CTGAACCCCTTTAGGCTGGTTCTTC<G>TCGGATCCTGCGTCGAGCTGTGCGT	A	From G to A						KKH SaCas9 comp. NNNRRT on 20
rs146512155	AARS2	57505	likely-pathogenic.uncertain-significance	Combined oxidative phosphorylation deficiency. Combined oxidative phosphorylation deficiency 8 (COXPD8)	GCGCCAAGGAGTGCCCCCAACTGAC<G>ACAGCCCCAAGTACAACTACTCCCT	C	From G to C	SpCas9 comp. NGG on 24					KKH SaCas9 comp. NNNRRT on 22				CjCas9 NNNVRYM on 19					SpCas9-NRRH comp. NRRH on 24	SpCas9-NRCH NRCH on 22								SpCas9-NRRH comp. NGGN on 24 SpCas9-NRTH comp. NGGN on 24 SpCas9-NRCH comp. NGGN on 24	xCas9 comp. NG on 24 SpCas9-NG comp. NG on 24
rs200187887	AARS2	57505	uncertain-significance.likely-pathogenic	Combined oxidative phosphorylation deficiency. Combined oxidative phosphorylation deficiency 8 (COXPD8)	GTACCGCGTGGTGGCTGACCACATC<C>GCACACTCAGTGTCTGCATCTCTGA	T	From C to T																SpCas9-NRCH comp. NRCH on 22
rs587777591	AARS2	57505	pathogenic	Leukoencephalopathy. progressive. with ovarian failure (LKENP). Combined oxidative phosphorylation deficiency 8 (COXPD8)	CAGCCCCAAGTACAACTACTCCCTG<C>GACCCAGCGGAAGTTATGGTGAGAG	T	From C to T													SpCas9 (From Strep. past.) NNGTGA on 22						enAsCas12a TGTV on 23
rs587777592	AARS2	57505	pathogenic	Leukoencephalopathy. progressive. with ovarian failure (LKENP)	GATCGCCAACCTGGTGTCAGAGGAC<G>AGGCAGCCTTCCTGGCCTCCCTGGA	A	From G to A										CjCas9 NNNVRYM on 19						SpCas9-NRCH NRCH on 22			enAsCas12a comp. TGTV on 25	enAsCas12a comp. VTTV on 23	FnCas12a comp. TTV on 24
rs587777590	AARS2	57505	pathogenic		GTGAGGGCCGCCTTTCTGAACTTCT<T>TCGGGACCGCCATGGCCACCGGCTG	G	From T to G										CjCas9 comp. NNNVRYM on 20						SpCas9-NRCH comp. NRCH on 23			enAsCas12a TGTV on 24						xCas9 NG on 24 SpCas9-NG NG on 24	SpCas9-NRTH NRTH on 24
rs387907061	AARS2	57505	pathogenic	Combined oxidative phosphorylation deficiency 8 (COXPD8)	GAGGCTTGTAACATGGCCTGGGAAC<T>GCTGACTCAGGTCTATGGGATCCCT	G	From T to G	SpCas9 NGG on 24											SpCas9-NG NANG on 22			SpCas9-NRRH NRRH on 24									SpCas9-NRRH NGGN on 24 SpCas9-NRTH NGGN on 24 SpCas9-NRCH NGGN on 24	xCas9 NG on 24 SpCas9-NG NG on 24
rs200781477	AARS2	57505	pathogenic		GACACAGTCTCTGCTGAGTCTCTCT<C>AGTGAGTGCTAGCCAAGCCGGGCTG	G	From C to G			EQR SpCas9 NGAG on 24	VQR SpCas9 NGAN on 24	SaCas9 NNGRRT on 23																				xCas9 NG on 24 SpCas9-NG NG on 24
rs587777125	AASS	10157	pathogenic	Hyperlysinemia	GTCTTGATACAGCCTTCGAATCGGC<G>GGCCATTCATGATAAGGTGAGTATT	A	From G to A										CjCas9 NNNVRYM on 19						SpCas9-NRCH NRCH on 22
rs587777126	AASS	10157	pathogenic		GCTACAGAATGCTTTGGAGACATGC<T>TTACCCTTATGTTGAAGAAATGGTA	G	From T to G		VRER SpCas9 NGCG on 22																		enAsCas12a VTTV on 25					xCas9 NG on 24 SpCas9-NG NG on 24	SpCas9-NRTH NRTH on 24
rs587777124	AASS	10157	pathogenic	Hyperlysinemia	GGTGGGCTTCCAGCCCCTGAACATT<C>AAACAATCCATTGAGATATAAATTT	G	From C to G				VQR SpCas9 NGAN on 24											SpCas9-NRRH NRRH on 24			AsCas12a RR comp. TYCV on 23					enAsCas12a comp. TTCN on 23 Cas12e (CasX) comp. TTCN on 23		xCas9 NG on 24 SpCas9-NG NG on 24
rs587777122	AASS	10157	pathogenic		GTATGACAAACATCCGGAGCGCTAC<A>TAAGTCGTTTTAATACTGATGTGAG	G	From A to G										CjCas9 comp. NNNVRYM on 22		SpCas9-NG NANG on 22													xCas9 NG on 24 SpCas9-NG NG on 24
rs724159990	ABAT	18	pathogenic	Gamma-aminobutyric acid transaminase deficiency	CCCTGGCTGCCCCGACTACAGCATC<C>TCTCCTTCATGGGCGCGTTCCATGG	T	From C to T															SpCas9-NRRH comp. NRRH on 22					enAsCas12a VTTV on 24	FnCas12a TTV on 25		enAsCas12a TTCN on 25 Cas12e (CasX) TTCN on 25
rs121434578	ABAT	18	pathogenic	Gamma-aminobutyric acid transaminase deficiency	TCCTTCATGGGCGCGTTCCATGGGA<G>GACCATGGGTAAGGAGGGACCATTG	A	From G to A															SpCas9-NRRH NRRH on 22			AsCas12a RR comp. TYCV on 25		enAsCas12a comp. VTTV on 24	FnCas12a comp. TTV on 25		enAsCas12a comp. TTCN on 25 Cas12e (CasX) comp. TTCN on 25
rs724159992	ABAT	18	pathogenic	Gamma-aminobutyric acid transaminase deficiency	TACCTGGTTGATGTGGACGGCAACC<G>AATGCTGGATCTTTATTCCCAGATC	A	From G to A											LbCas12a & AsCas12a comp. TTTV on 23										FnCas12a comp. TTV on 24
rs724159991	ABAT	18	pathogenic	Gamma-aminobutyric acid transaminase deficiency	AAATCCATTCGTTTCCGTCCCACGC<T>GGTCTTCAGGGATCACCACGCTCAC	C	From T to C										CjCas9 NNNVRYM on 19														SpCas9-NRTH comp. NGGN on 24 SpCas9-NRCH comp. NGGN on 24	xCas9 comp. NG on 24 SpCas9-NG comp. NG on 24		St3Cas9 comp. NGGNG on 24
rs786205496	ABAT	18	likely-pathogenic		GCACTCTAAAGCCATTCACAAGATC<G>ACATCCCTTCCTTTGACTGGCCCAT	A	From G to A																				enAsCas12a comp. VTTV on 23	FnCas12a comp. TTV on 24
rs28937314_0	ABCA1	19	likely-pathogenic.pathogenic	Tangier disease (TGD)	CCAGATCACCTCCTTCCTGGGCCAC<A>ATGGAGCGGGGAAGACGACCACCAT	C	From A to C	SpCas9 comp. NGG on 24					KKH SaCas9 comp. NNNRRT on 22						SpCas9-NG comp. NANG on 22			SpCas9-NRRH comp. NRRH on 24									SpCas9-NRRH comp. NGGN on 24 SpCas9-NRTH comp. NGGN on 24 SpCas9-NRCH comp. NGGN on 24	xCas9 comp. NG on 24 SpCas9-NG comp. NG on 24		St3Cas9 comp. NGGNG on 24
rs28937314_1	ABCA1	19	likely-pathogenic.pathogenic	Tangier disease (TGD)	CCAGATCACCTCCTTCCTGGGCCAC<A>ATGGAGCGGGGAAGACGACCACCAT	G	From A to G				VQR SpCas9 NGAN on 24						CjCas9 comp. NNNVRYM on 19		SpCas9-NG NANG on 22													xCas9 NG on 24 SpCas9-NG NG on 24
rs146292819	ABCA1	19	pathogenic	ABCA1-Related Disorders	TTTTTTTTAGAAGCTGAATAATATC<A>ATGATATCCTGAAGTCCGTGTTCTT	C	From A to C	SpCas9 comp. NGG on 24				SaCas9 comp. NNGRRT on 23							SpCas9-NG comp. NANG on 22			SpCas9-NRRH comp. NRRH on 24			AsCas12a RR TYCV on 23						SpCas9-NRRH comp. NGGN on 24 SpCas9-NRTH comp. NGGN on 24 SpCas9-NRCH comp. NGGN on 24	xCas9 comp. NG on 24 SpCas9-NG comp. NG on 24
rs137854498_0	ABCA1	19	pathogenic		CTTTGTCGTATTCCTGATCCAGGAG<C>GGGTCAGCAAAGCAAAACACCTGCA	A	From C to A			EQR SpCas9 NGAG on 23	VQR SpCas9 NGAN on 23								SpCas9-NG NANG on 24
rs137854498_1	ABCA1	19	pathogenic	Tangier disease. variant	CTTTGTCGTATTCCTGATCCAGGAG<C>GGGTCAGCAAAGCAAAACACCTGCA	T	From C to T					SaCas9 NNGRRT on 20	KKH SaCas9 NNNRRT on 20
rs137854496_0	ABCA1	19	uncertain-significance.pathogenic		CCCTTTGAGGACATGCGGTACGTCT<G>GGGGGGCTTCGCCTACTTGCAGGAT	T	From G to T												SpCas9-NG comp. NANG on 24								enAsCas12a VTTV on 23	FnCas12a TTV on 24
rs137854496_1	ABCA1	19	uncertain-significance.pathogenic	Tangier disease (TGD). ABCA1-Related Disorders	CCCTTTGAGGACATGCGGTACGTCT<G>GGGGGGCTTCGCCTACTTGCAGGAT	C	From G to C			EQR SpCas9 comp. NGAG on 24	VQR SpCas9 comp. NGAN on 24																					xCas9 comp. NG on 24 SpCas9-NG comp. NG on 24
rs2853578	ABCA1	19	pathogenic	Tangier disease (TGD)	GTCTGGGGGGGCTTCGCCTACTTGC<A>GGATGTGGTGGAGCAGGCAATCATC	G	From A to G		VRER SpCas9 NGCG on 22								CjCas9 comp. NNNVRYM on 22								AsCas12a RR comp. TYCV on 22						SpCas9-NRRH NGGN on 24 SpCas9-NRTH NGGN on 24 SpCas9-NRCH NGGN on 24	xCas9 NG on 24 SpCas9-NG NG on 24
rs137854500	ABCA1	19	pathogenic	Tangier disease (TGD)	CTGTCTTCGCCCGTTCACTGAAGAT<G>ATGCTGCTGATCCAAATGATTCTGA	A	From G to A										CjCas9 NNNVRYM on 19							AsCas12a RVR comp. TATV on 25			enAsCas12a comp. VTTV on 23	FnCas12a comp. TTV on 24					SpCas9-NRTH NRTH on 22
rs137854501	ABCA1	19	pathogenic	Tangier disease (TGD)	CACAGGCATGGATCCCAAAGCCCGG<C>GGTTCTTGTGGAATTGTGCCCTAAG	T	From C to T						KKH SaCas9 NNNRRT on 20
rs137854499	ABCA1	19	pathogenic	Familial hypoalphalipoproteinemia	TTGACTGGGAGAGAACACGTGGAGT<T>CTTTGCCCTTTTGAGAGGAGTCCCA	C	From T to C	SpCas9 comp. NGG on 23			VQR SpCas9 comp. NGAN on 24						CjCas9 NNNVRYM on 19		SpCas9-NG comp. NANG on 22												SpCas9-NRTH comp. NGGN on 23 SpCas9-NRCH comp. NGGN on 23	xCas9 comp. NG on 24 SpCas9-NG comp. NG on 24
rs137854494	ABCA1	19	pathogenic	Tangier disease (TGD)	CAAAATCAAGAAGATGCTGCCTGTG<T>GTCCCCCAGGGGCAGGGGGGCTGCC	C	From T to C		VRER SpCas9 NGCG on 23								CjCas9 NNNVRYM on 22		SpCas9-NG comp. NANG on 22													xCas9 comp. NG on 24 SpCas9-NG comp. NG on 24
rs137854497	ABCA1	19	pathogenic	Tangier disease (TGD)	CAGGACCTGACAGGAAGAAACATTT<C>GGATTATCTGGTGAAGACGTATGTG	T	From C to T											LbCas12a & AsCas12a TTTV on 23										FnCas12a TTV on 24	enAsCas12a TTTT on 22
rs137854495	ABCA1	19	pathogenic	Tangier disease (TGD)	ACCTCCTTCCTGGGCCACAATGGAG<C>GGGGAAGACGACCACCATGTAAGAA	T	From C to T					SaCas9 NNGRRT on 20	KKH SaCas9 NNNRRT on 20
rs762770081	ABCA1	19	likely-pathogenic	Inborn genetic diseases	CTAATTGCCAGACGGAGTCGGAAAG<G>ATTTTTTGCTCAGGTGAGACGTGCT	A	From G to A				VQR SpCas9 NGAN on 23				St1Cas9 NNRGAAW on 21							SpCas9-NRRH NRRH on 22					enAsCas12a comp. VTTV on 23	FnCas12a comp. TTV on 24		enAsCas12a comp. TTCN on 24 Cas12e (CasX) comp. TTCN on 24
rs28937313	ABCA1	19	pathogenic	Tangier disease (TGD)	CAGATCACCTCCTTCCTGGGCCACA<A>TGGAGCGGGGAAGACGACCACCATG	G	From A to G																SpCas9-NRCH comp. NRCH on 23									xCas9 NG on 24 SpCas9-NG NG on 24
rs137854502	ABCA1	19	pathogenic	Tangier disease (TGD)	ATTACCTGTGGTTTGGTTTTAGGTA<C>TGGGACCCTGGTCCTCGAGCTGACC	A	From C to A						KKH SaCas9 NNNRRT on 21						SpCas9-NG NANG on 24			SpCas9-NRRH NRRH on 23					enAsCas12a comp. VTTV on 24	FnCas12a comp. TTV on 25					SpCas9-NRTH comp. NRTH on 23
rs28933692	ABCA1	19	pathogenic	Familial hypoalphalipoproteinemia	CATGGATGAAGCGGACGTCCTGGGG<G>ACAGGATTGCCATCATCTCCCATGG	T	From G to T					SaCas9 NNGRRT on 20	KKH SaCas9 NNNRRT on 20				CjCas9 NNNVRYM on 20					SpCas9-NRRH NRRH on 22	SpCas9-NRCH comp. NRCH on 24										SpCas9-NRTH NRTH on 23
rs763481375_0	ABCA12	26154	pathogenic		CTCACAGGCAATGTACAGAAGCAAC<C>GAATGAACACACCACAAGGATCATT	A	From C to A								St1Cas9 NNRGAAW on 23							SpCas9-NRRH NRRH on 24
rs28940268	ABCA12	26154	pathogenic	Autosomal recessive congenital ichthyosis 4A (LI2)	ATTACTTCATTGCTGGGGCCCAATG<G>AGCTGGGAAAACTACTACCATGTAT	A	From G to A				VQR SpCas9 NGAN on 23																enAsCas12a comp. VTTV on 23	FnCas12a comp. TTV on 24		enAsCas12a comp. TTCN on 24 Cas12e (CasX) comp. TTCN on 24
rs114863111	ABCA12	26154	pathogenic		AATTCTTCCTTCCTATTGGAAGGAG<C>GATTTGGGTGTGCAGAGGTGAAGCC	T	From C to T					SaCas9 NNGRRT on 20	KKH SaCas9 NNNRRT on 20							SpCas9 (From Strep. past.) NNGTGA on 22
rs757520757	ABCA12	26154	pathogenic		CCTTTTTGGAAAGCTGTCTCAACTT<C>GAAACTTGACCGAACTTCTTTGTGA	T	From C to T											LbCas12a & AsCas12a TTTV on 23										FnCas12a TTV on 24
rs755391236	ABCA12	26154	pathogenic		GGTTGTATTTATAGCTGCCTTTGTA<A>AAAAGCTTGTCTATGAGAAAGACCT	G	From A to G				VQR SpCas9 NGAN on 24				St1Cas9 NNRGAAW on 22			LbCas12a & AsCas12a comp. TTTV on 22										FnCas12a comp. TTV on 23		enAsCas12a comp. TTCN on 23 Cas12e (CasX) comp. TTCN on 23		xCas9 NG on 24 SpCas9-NG NG on 24
rs756771290	ABCA12	26154	likely-pathogenic		AGAGAAAAATCTCAAGAGTGGATGG<A>TAAGTCGCCACTTTTCATGAATTCC	G	From A to G	SpCas9 NGG on 23															SpCas9-NRCH comp. NRCH on 23								SpCas9-NRTH NGGN on 23 SpCas9-NRCH NGGN on 23	xCas9 NG on 24 SpCas9-NG NG on 24
rs1085308032	ABCA12	26154	likely-pathogenic		AAGGACAGAGCTACCTCTATGTGCA<G>TTATGGCACAAAAAGAAAATTATCC	A	From G to A						KKH SaCas9 comp. NNNRRT on 20														enAsCas12a comp. VTTV on 24	FnCas12a comp. TTV on 25					SpCas9-NRTH comp. NRTH on 23
rs137853289_0	ABCA12	26154	pathogenic		TCAGGGCACCATGTTTTTTTCCTTG<C>GACTCTTAATCAACGAATCCCTGAT	A	From C to A			EQR SpCas9 NGAG on 23	VQR SpCas9 NGAN on 23											SpCas9-NRRH NRRH on 24
rs137853289_1	ABCA12	26154	pathogenic	Autosomal recessive congenital ichthyosis 4B (ARCI4B)	TCAGGGCACCATGTTTTTTTCCTTG<C>GACTCTTAATCAACGAATCCCTGAT	T	From C to T													SpCas9 (From Strep. past.) NNGTGA on 22						enAsCas12a TGTV on 23
rs28940269	ABCA12	26154	pathogenic	Autosomal recessive congenital ichthyosis 4A (LI2). Autosomal recessive congenital ichthyosis 4A (LI2). Autosomal recessive congenital ichthyosis 4B (ARCI4B)	CATATTACTTCATTGCTGGGGCCCA<A>TGGAGCTGGGAAAACTACTACCATG	G	From A to G																SpCas9-NRCH comp. NRCH on 23									xCas9 NG on 24 SpCas9-NG NG on 24
rs28940568	ABCA12	26154	pathogenic	Autosomal recessive congenital ichthyosis 4A (LI2)	GGGTGACCTCAACATCGGGTGCTAC<G>GCATTTCAGATACCACCGTGGAGGA	A	From G to A																SpCas9-NRCH NRCH on 22			enAsCas12a comp. TGTV on 25
rs201542666_0	ABCA12	26154	likely-pathogenic		TATTTTCATAATTTTGGCTATTACT<C>GGACCAAATTTCCTCCAACTGCAAA	A	From C to A												SpCas9-NG NANG on 24
rs201542666_1	ABCA12	26154	likely-pathogenic		TATTTTCATAATTTTGGCTATTACT<C>GGACCAAATTTCCTCCAACTGCAAA	T	From C to T																				enAsCas12a VTTV on 23	FnCas12a TTV on 24
rs199503269	ABCA12	26154	pathogenic	Autosomal recessive congenital ichthyosis 4B (ARCI4B)	TGCACTTTTTCTTTCTAGGTTTGGA<C>GAGGATTTACTGTCAAAGTTCACTT	T	From C to T					SaCas9 NNGRRT on 20	KKH SaCas9 NNNRRT on 20
rs762065937	ABCA12	26154	likely-pathogenic		TTAATTTTAGGTTACCTCGCACCTC<G>AAACCTTCCTAGTACTGGATTCTTT	C	From G to C	SpCas9 comp. NGG on 24														SpCas9-NRRH comp. NRRH on 24			AsCas12a RR TYCV on 23						SpCas9-NRRH comp. NGGN on 24 SpCas9-NRTH comp. NGGN on 24 SpCas9-NRCH comp. NGGN on 24	xCas9 comp. NG on 24 SpCas9-NG comp. NG on 24		St3Cas9 comp. NGGNG on 24
rs761557390	ABCA12	26154	pathogenic		CTTTTGGAATTTAATAGGTATGGTA<T>GATCCAGAAGGCTATCACTCCCTTC	G	From T to G	SpCas9 NGG on 24				SaCas9 NNGRRT on 23										SpCas9-NRRH NRRH on 24									SpCas9-NRRH NGGN on 24 SpCas9-NRTH NGGN on 24 SpCas9-NRCH NGGN on 24	xCas9 NG on 24 SpCas9-NG NG on 24
rs726070	ABCA12	26154	benign.pathogenic.likely-benign	Autosomal recessive congenital ichthyosis 4B (ARCI4B). Congenital ichthyosiform erythroderma	CAGGGTACATGGAATTCCAGAAAAG<G>ATATTAAAGAAGTGAGTACAAGTGT	A	From G to A				VQR SpCas9 NGAN on 23				St1Cas9 NNRGAAW on 21							SpCas9-NRRH NRRH on 22					enAsCas12a comp. VTTV on 23	FnCas12a comp. TTV on 24		enAsCas12a comp. TTCN on 24 Cas12e (CasX) comp. TTCN on 24
rs28940271	ABCA12	26154	pathogenic	Autosomal recessive congenital ichthyosis 4A (LI2)	CATTCTGTCAACGCACCACTTGGAC<G>AGGCTGAAGTGCTGAGTGACCGCAT	A	From G to A										CjCas9 NNNVRYM on 19						SpCas9-NRCH NRCH on 22			enAsCas12a comp. TGTV on 25	enAsCas12a comp. VTTV on 23	FnCas12a comp. TTV on 24
rs772046102	ABCA12	26154	likely-pathogenic		TTTGACTTATAAATTAACTAAAGAG<C>AAATTGCTTCAAAATATGGAATTCC	A	From C to A				VQR SpCas9 NGAN on 23				St1Cas9 NNRGAAW on 21			LbCas12a & AsCas12a comp. TTTV on 23				SpCas9-NRRH NRRH on 23 SpCas9-NRRH NRRH on 24						FnCas12a comp. TTV on 24	enAsCas12a comp. TTTT on 22	enAsCas12a comp. TTCN on 24 Cas12e (CasX) comp. TTCN on 24
rs28940270	ABCA12	26154	pathogenic	Autosomal recessive congenital ichthyosis 4A (LI2)	TCTACTGGAGTTGACCCATGTTCTC<G>CCGAAGTATATGGGATGTTATATCC	A	From G to A						KKH SaCas9 comp. NNNRRT on 20							SpCas9 (From Strep. past.) comp. NNGTGA on 22
rs886039296	ABCA12	26154	likely-pathogenic		TTTTTACATTTTTCTTCTTGCAGGT<C>AGTTACTAGAAATGTTTAAAAATGT	T	From C to T																				enAsCas12a VTTV on 23	FnCas12a TTV on 24
rs11891778_0	ABCA12	26154	benign.pathogenic.likely-pathogenic.likely-benign		ACTAAGCAATCTATTTGATGTTCTT<C>GAAAGGCAAACAGGTAAGAAAATGT	A	From C to A								St1Cas9 NNRGAAW on 23							SpCas9-NRRH NRRH on 24
rs11891778_1	ABCA12	26154	benign.pathogenic.likely-pathogenic.likely-benign	Congenital ichthyosiform erythroderma	ACTAAGCAATCTATTTGATGTTCTT<C>GAAAGGCAAACAGGTAAGAAAATGT	G	From C to G	SpCas9 NGG on 24							St1Cas9 NNRGAAW on 23							SpCas9-NRRH NRRH on 24			AsCas12a RR comp. TYCV on 23						SpCas9-NRRH NGGN on 24 SpCas9-NRTH NGGN on 24 SpCas9-NRCH NGGN on 24	xCas9 NG on 24 SpCas9-NG NG on 24
rs11891778_2	ABCA12	26154	benign.pathogenic.likely-pathogenic.likely-benign	Autosomal recessive congenital ichthyosis 4B (ARCI4B). Autosomal recessive congenital ichthyosis 4A (LI2)	ACTAAGCAATCTATTTGATGTTCTT<C>GAAAGGCAAACAGGTAAGAAAATGT	T	From C to T											LbCas12a & AsCas12a TTTV on 23										FnCas12a TTV on 24
rs767707248	ABCA12	26154	pathogenic		TTTAATTTTAGGTTACCTCGCACCT<C>GAAACCTTCCTAGTACTGGATTCTT	T	From C to T																				enAsCas12a VTTV on 23	FnCas12a TTV on 24
rs149989682	ABCA3	21	likely-pathogenic.pathogenic	Surfactant metabolism dysfunction. pulmonary. 3 (SMDP3). Idiopathic fibrosing alveolitis. chronic form (IPF). Pulmonary arterial hypertension. Respiratory insufficiency. Pulmonary insufficiency	CAGCGTGATGGCTTCTCTCCCCAGG<A>GTACATGCGCATGATGGGGCTCAGC	T	From A to T						KKH SaCas9 NNNRRT on 20				CjCas9 comp. NNNVRYM on 21						SpCas9-NRCH comp. NRCH on 24			enAsCas12a TGTV on 25
rs28936691	ABCA3	21	pathogenic	Surfactant metabolism dysfunction. pulmonary. 3 (SMDP3)	CGGCTGGCCATCATGGTGCAGGGGC<A>GTTCAAGTGCCTGGGCAGCCCCCAG	C	From A to C	SpCas9 comp. NGG on 24									CjCas9 comp. NNNVRYM on 22		SpCas9-NG comp. NANG on 22			SpCas9-NRRH comp. NRRH on 24									SpCas9-NRRH comp. NGGN on 24 SpCas9-NRTH comp. NGGN on 24 SpCas9-NRCH comp. NGGN on 24	xCas9 comp. NG on 24 SpCas9-NG comp. NG on 24
rs121909182	ABCA3	21	pathogenic	Surfactant metabolism dysfunction. pulmonary. 3 (SMDP3)	GTCACTGAGACAGTGCGCAGGGCAC<T>TGTGATCAACATGCGAGGTGAGACA	C	From T to C										CjCas9 NNNVRYM on 19														SpCas9-NRTH comp. NGGN on 24 SpCas9-NRCH comp. NGGN on 24	xCas9 comp. NG on 24 SpCas9-NG comp. NG on 24		St3Cas9 comp. NGGNG on 24
rs121909184	ABCA3	21	pathogenic	Surfactant metabolism dysfunction. pulmonary. 3 (SMDP3)	ACAGATCACCGTCCTGCTGGGCCAC<A>ACGGTGCCGGGAAGACCACCACCCT	G	From A to G				VQR SpCas9 NGAN on 24						CjCas9 comp. NNNVRYM on 19		SpCas9-NG NANG on 22													xCas9 NG on 24 SpCas9-NG NG on 24
rs121909185	ABCA3	21	pathogenic.uncertain-significance		ATCGCCGCCTCCTTCATGACCCTGC<T>CTTCTGTGTCAAGGTGAGCATGGCG	G	From T to G		VRER SpCas9 NGCG on 22 VRER SpCas9 comp. NGCG on 23														SpCas9-NRCH NRCH on 24									xCas9 NG on 24 SpCas9-NG NG on 24
rs121909183	ABCA3	21	pathogenic	Surfactant metabolism dysfunction. pulmonary. 3 (SMDP3)	ATGGACCCCGTGGCCCGGCGCCTGC<T>TTGGGACACCGTGGCACGAGCCCGA	C	From T to C												SpCas9-NG comp. NANG on 22								enAsCas12a VTTV on 25				SpCas9-NRTH comp. NGGN on 24 SpCas9-NRCH comp. NGGN on 24	xCas9 comp. NG on 24 SpCas9-NG comp. NG on 24
rs754714105	ABCA3	21	pathogenic	Primary interstitial lung disease specific to childhood due to pulmonary surfactant protein anomalies	TTTTCTGGGATCCTCATCTGGCTCC<G>CTTGAAGATTCAGTCGGAAAATGTG	A	From G to A						KKH SaCas9 comp. NNNRRT on 20
rs121909181	ABCA3	21	pathogenic	Surfactant metabolism dysfunction. pulmonary. 3 (SMDP3)	GTGGAGTCCACGTGGCCAGTTTCTG<G>CTCTCTGCTCTGCTGTGGGACCTCA	A	From G to A				VQR SpCas9 NGAN on 23	SaCas9 comp. NNGRRT on 20	KKH SaCas9 comp. NNNRRT on 20																				SpCas9-NRTH comp. NRTH on 23
rs139738862	ABCA3	21	likely-pathogenic	Surfactant metabolism dysfunction. pulmonary. 3 (SMDP3)	AGTCGCAGAGCACCTTTATTTCTAC<G>CCCAGGTGAGTTGGGGGCCAGGGGT	A	From G to A					SaCas9 comp. NNGRRT on 20	KKH SaCas9 comp. NNNRRT on 20										SpCas9-NRCH NRCH on 22			enAsCas12a comp. TGTV on 25
rs1064793014	ABCA4	24	likely-pathogenic	Retinal dystrophy	CCTCCTGGGAGTGAATGGTGCCGGC<A>AAACAACCACATTCAAGATGCTCAC	G	From A to G		VRER SpCas9 NGCG on 22		VQR SpCas9 NGAN on 24						CjCas9 comp. NNNVRYM on 22	LbCas12a & AsCas12a comp. TTTV on 22							AsCas12a RR comp. TYCV on 23			FnCas12a comp. TTV on 23		enAsCas12a comp. TTCN on 23 Cas12e (CasX) comp. TTCN on 23		xCas9 NG on 24 SpCas9-NG NG on 24		St3Cas9 NGGNG on 21
rs61750645_0	ABCA4	24	pathogenic.pathogenic-likely-pathogenic.likely-pathogenic.not-provided		TGGCACGTACAGTGGGGGCAACAAG<C>GGAAACTCTCCACAGCCATCGCACT	A	From C to A			EQR SpCas9 NGAG on 23	VQR SpCas9 NGAN on 23								SpCas9-NG NANG on 24
rs61750645_1	ABCA4	24	pathogenic.pathogenic-likely-pathogenic.likely-pathogenic.not-provided	Retinitis pigmentosa 19 (RP19). Stargardt disease 1 (STGD1). Retinal dystrophy	TGGCACGTACAGTGGGGGCAACAAG<C>GGAAACTCTCCACAGCCATCGCACT	T	From C to T						KKH SaCas9 NNNRRT on 20
rs748357067	ABCA4	24	pathogenic		TATCTTTATTTCTGGTCTTGATCTG<G>TTAAGGAATGCCAACCCACTCTACA	A	From G to A				VQR SpCas9 NGAN on 23		KKH SaCas9 comp. NNNRRT on 20	NmCas9 NNNNGATT on 20																			SpCas9-NRTH comp. NRTH on 23
rs886044756	ABCA4	24	likely-pathogenic		TGTGTTTTCTCCTAGTGCTTTGGCC<T>CCTGGGAGTGAATGGTGCCGGCAAA	G	From T to G		VRER SpCas9 comp. NGCG on 23								CjCas9 NNNVRYM on 21						SpCas9-NRCH NRCH on 24									xCas9 NG on 24 SpCas9-NG NG on 24
rs61750200	ABCA4	24	pathogenic	Stargardt disease 1 (STGD1). Cone-rod dystrophy 3 (CORD3). Cone-rod dystrophy 3 (CORD3). Age-related macular degeneration 2 (ARMD2). Stargardt disease 1 (STGD1). Retinitis pigmentosa 19 (RP19)	CGCCTGCAGCGAGGCCCTCCTGGAG<C>GCTTCATCATCTTCAGCCAGAGACG	T	From C to T					SaCas9 NNGRRT on 20	KKH SaCas9 NNNRRT on 20				CjCas9 comp. NNNVRYM on 19						SpCas9-NRCH comp. NRCH on 22
rs886044727	ABCA4	24	pathogenic	Stargardt disease 1 (STGD1)	TGGTCCTGGATAAGTTTGAAAGCTA<C>AATGATGAAACTCAGCTCACCCAAC	A	From C to A											LbCas12a & AsCas12a comp. TTTV on 24				SpCas9-NRRH NRRH on 23 SpCas9-NRRH NRRH on 24						FnCas12a comp. TTV on 25	enAsCas12a comp. TTTT on 23
rs1064793011	ABCA4	24	likely-pathogenic		CCTAACTCCAGAACAAGTCCTGGAT<G>GTAAGGACTGGACGGGCCATACTTG	A	From G to A										CjCas9 NNNVRYM on 19							AsCas12a RVR comp. TATV on 25									SpCas9-NRTH NRTH on 22
rs41292677	ABCA4	24	likely-pathogenic.benign.likely-benign	Stargardt disease 1 (STGD1). Cone-Rod Dystrophy. Recessive. Stargardt Disease. Recessive. Retinitis Pigmentosa. Recessive. Macular degeneration. Stargardt disease 1 (STGD1). Cone/cone-rod dystrophy	AATGGCATTTCTTTCTCTTCCCTAG<G>TTGCAAACTGGAGTATTAAGAGCCT	C	From G to C												SpCas9-NG comp. NANG on 22			SpCas9-NRRH NRRH on 22 SpCas9-NRRH comp. NRRH on 23	SpCas9-NRCH NRCH on 23 SpCas9-NRCH comp. NRCH on 24									xCas9 comp. NG on 24 SpCas9-NG comp. NG on 24
rs62646862	ABCA4	24	likely-pathogenic.not-provided.likely-benign		TATTCATATGTAGGAAGAGGAATAC<G>AATAAGGGATATCTTGAAAGATGAA	T	From G to T						KKH SaCas9 comp. NNNRRT on 22									SpCas9-NRRH comp. NRRH on 24	SpCas9-NRCH NRCH on 22
rs61749423_0	ABCA4	24	pathogenic.likely-pathogenic		GAGCATCGTCTTGGAGAAGGAGTTG<C>GACTGAAGGAGACCTTGAAAAATCA	A	From C to A			EQR SpCas9 NGAG on 23	VQR SpCas9 NGAN on 23											SpCas9-NRRH NRRH on 24
rs61749423_1	ABCA4	24	pathogenic.likely-pathogenic	Bull's eye maculopathy (MCDCA). Stargardt disease 1 (STGD1). Leber congenital amaurosis (LCA)	GAGCATCGTCTTGGAGAAGGAGTTG<C>GACTGAAGGAGACCTTGAAAAATCA	T	From C to T													SpCas9 (From Strep. past.) NNGTGA on 22						enAsCas12a TGTV on 23
rs776757706	ABCA4	24	likely-pathogenic	Retinal dystrophy	CTGAGTTGTCTCATTTCACACAGAT<G>GGCGGTCATTCCCATGATGTACCCA	A	From G to A										CjCas9 NNNVRYM on 19							AsCas12a RVR comp. TATV on 25									SpCas9-NRTH NRTH on 22
rs766570903	ABCA4	24	likely-pathogenic	Stargardt disease 1 (STGD1)	AATCTACCTCCAGCAGATGCCCTAC<C>CCTGCTTCGTGGACGATTCGTGAGT	G	From C to G		VRER SpCas9 comp. NGCG on 23								CjCas9 NNNVRYM on 21		SpCas9-NG NANG on 22			SpCas9-NRRH comp. NRRH on 22	SpCas9-NRCH NRCH on 24									xCas9 NG on 24 SpCas9-NG NG on 24
rs61752398	ABCA4	24	pathogenic.not-provided	Stargardt disease 1 (STGD1)	AGATTTCCGGTACATCTGGGGCGGG<T>TTGCCTATCTGCAGGACATGGTTGA	A	From T to A				VQR SpCas9 NGAN on 23	SaCas9 NNGRRT on 21	KKH SaCas9 NNNRRT on 21 KKH SaCas9 comp. NNNRRT on 20	NmCas9 NNNNGATT on 20			CjCas9 comp. NNNVRYM on 20					SpCas9-NRRH NRRH on 23			AsCas12a RR comp. TYCV on 25		enAsCas12a VTTV on 25						SpCas9-NRTH NRTH on 24 SpCas9-NRTH comp. NRTH on 23
rs760790294	ABCA4	24	likely-pathogenic		ATCTACCTCCAGCAGATGCCCTACC<C>CTGCTTCGTGGACGATTCGTGAGTC	A	From C to A						KKH SaCas9 comp. NNNRRT on 20									SpCas9-NRRH comp. NRRH on 22	SpCas9-NRCH NRCH on 24
rs1064797113_0	ABCA4	24	likely-pathogenic.uncertain-significance		GCAGCCACAAGGACTTCCTGGCGCA<G>GTACTATTGTCGGTCGGTGTTTAGC	A	From G to A																				enAsCas12a comp. VTTV on 24	FnCas12a comp. TTV on 25
rs1064797113_1	ABCA4	24	likely-pathogenic.uncertain-significance		GCAGCCACAAGGACTTCCTGGCGCA<G>GTACTATTGTCGGTCGGTGTTTAGC	C	From G to C												SpCas9-NG comp. NANG on 22													xCas9 comp. NG on 24 SpCas9-NG comp. NG on 24
rs886044720	ABCA4	24	likely-pathogenic	Stargardt disease 1 (STGD1)	CAACCCACTCTACAGCCATCATGAA<T>GTAAGCATAGCAGGGTAGCTTGGGC	G	From T to G	SpCas9 NGG on 24					KKH SaCas9 NNNRRT on 22				CjCas9 NNNVRYM on 22		SpCas9-NG NANG on 22			SpCas9-NRRH NRRH on 24									SpCas9-NRRH NGGN on 24 SpCas9-NRTH NGGN on 24 SpCas9-NRCH NGGN on 24	xCas9 NG on 24 SpCas9-NG NG on 24
rs878853396	ABCA4	24	likely-pathogenic		ACAGGGGATCACAAGGAGCCAGGTG<C>AGGCGGAGGCTCCAGTTGGAATCTA	G	From C to G	SpCas9 NGG on 23		EQR SpCas9 NGAG on 24	VQR SpCas9 NGAN on 24											SpCas9-NRRH NRRH on 23			AsCas12a RR comp. TYCV on 24						SpCas9-NRRH NGGN on 23 SpCas9-NRTH NGGN on 23	xCas9 NG on 24 SpCas9-NG NG on 24		St3Cas9 NGGNG on 23
rs61753037	ABCA4	24	likely-pathogenic.not-provided	Stargardt disease 1 (STGD1)	CTGGGAGTGAATGGTGCCGGCAAAA<C>AACCACATTCAAGATGCTCACTGGG	T	From C to T						KKH SaCas9 NNNRRT on 20																				SpCas9-NRTH NRTH on 23
rs1064793005	ABCA4	24	pathogenic		ACGAATAAGGGATATCTTGAAAGAT<G>AAGAAACACTGACACTATTTCTCAT	T	From G to T						KKH SaCas9 comp. NNNRRT on 22	NmCas9 NNNNGATT on 18								SpCas9-NRRH comp. NRRH on 24					enAsCas12a VTTV on 23	FnCas12a TTV on 24					SpCas9-NRTH NRTH on 22
rs1131691262	ABCA4	24	likely-pathogenic		GAGACAGATACAGCTTTTGCTCTGG<A>AGAACTGGACCCTGCGGAAAAGGCA	G	From A to G	SpCas9 NGG on 23		EQR SpCas9 NGAG on 24	VQR SpCas9 NGAN on 24																				SpCas9-NRTH NGGN on 23 SpCas9-NRCH NGGN on 23	xCas9 NG on 24 SpCas9-NG NG on 24		St3Cas9 NGGNG on 23
rs61748520	ABCA4	24	pathogenic.not-provided		GCCGCATGCTGTGGAACGTCATCGT<G>AGCATCATCAGAGAAGGGAGGGCTG	C	From G to C				VQR SpCas9 comp. NGAN on 24						CjCas9 NNNVRYM on 19					SpCas9-NRRH comp. NRRH on 24										xCas9 comp. NG on 24 SpCas9-NG comp. NG on 24	SpCas9-NRTH NRTH on 22
rs61750155	ABCA4	24	pathogenic.likely-pathogenic	Stargardt disease 1 (STGD1)	TTTTAGGGCCCTATCACTAGAGAGG<C>CTCTAAAGAAATACCTGATTTCCTT	A	From C to A				VQR SpCas9 NGAN on 23	SaCas9 comp. NNGRRT on 20	KKH SaCas9 comp. NNNRRT on 20				CjCas9 comp. NNNVRYM on 20					SpCas9-NRRH NRRH on 23 SpCas9-NRRH comp. NRRH on 22	SpCas9-NRCH NRCH on 24										SpCas9-NRTH comp. NRTH on 23
rs61750560	ABCA4	24	pathogenic		GCCTAAGGACAGGAGCCCCGAGGAG<T>ATGGAATCACCGTCATTAGCCAACC	G	From T to G	SpCas9 NGG on 23			VQR SpCas9 NGAN on 24	SaCas9 NNGRRT on 22	KKH SaCas9 NNNRRT on 22						SpCas9-NG NANG on 22			SpCas9-NRRH NRRH on 23 SpCas9-NRRH NRRH on 24									SpCas9-NRRH NGGN on 23 SpCas9-NRCH NGGN on 23	xCas9 NG on 24 SpCas9-NG NG on 24
rs61750120	ABCA4	24	pathogenic.pathogenic-likely-pathogenic	Stargardt disease 1 (STGD1)	AATCTGGGATCTGCTCCTGAAGTAT<C>GCTCAGGTAACAGCTGCTGCTCAGT	T	From C to T										CjCas9 comp. NNNVRYM on 19						SpCas9-NRCH comp. NRCH on 22				enAsCas12a VTTV on 23	FnCas12a TTV on 24
rs1356104318	ABCA4	24	likely-pathogenic		GTGCTCCCTCTCCCAGGGCACCCTA<C>AGTGGATAGAAGACACTCTGTATGC	G	From C to G			EQR SpCas9 NGAG on 24	VQR SpCas9 NGAN on 24	SaCas9 NNGRRT on 23										SpCas9-NRRH NRRH on 23										xCas9 NG on 24 SpCas9-NG NG on 24
rs200692438	ABCA4	24	likely-pathogenic	Cone-rod dystrophy 3 (CORD3). Stargardt disease 1 (STGD1). Stargardt disease 1 (STGD1)	TTCATGATCATCCTGAACCGCTGTT<T>CCCTATCTTCATGGTGCTGGCATGG	G	From T to G										CjCas9 comp. NNNVRYM on 20						SpCas9-NRCH NRCH on 24 SpCas9-NRCH comp. NRCH on 23				enAsCas12a VTTV on 22	FnCas12a TTV on 23				xCas9 NG on 24 SpCas9-NG NG on 24
rs61748526	ABCA4	24	likely-pathogenic.not-provided	Stargardt disease 1 (STGD1)	GCTGCCGTGGCTCCAGGGGATCTTC<T>GCAATGTGAACAATCCCTGTTTTCA	G	From T to G	SpCas9 NGG on 24									CjCas9 NNNVRYM on 22					SpCas9-NRRH NRRH on 24			AsCas12a RR TYCV on 22						SpCas9-NRRH NGGN on 24 SpCas9-NRTH NGGN on 24 SpCas9-NRCH NGGN on 24	xCas9 NG on 24 SpCas9-NG NG on 24
rs752147871	ABCA4	24	likely-pathogenic		GTGAATGGTGCCGGCAAAACAACCA<C>ATTCAAGATGCTCACTGGGGACACC	T	From C to T										CjCas9 comp. NNNVRYM on 19							AsCas12a RVR comp. TATV on 24									SpCas9-NRTH NRTH on 23 SpCas9-NRTH comp. NRTH on 22
rs368846708	ABCA4	24	uncertain-significance.likely-pathogenic		CATCACCTTCTACGAGAACCAGATC<A>CCGCATTCCTGGGCCACAATGGAGC	T	From A to T			EQR SpCas9 comp. NGAG on 23	VQR SpCas9 comp. NGAN on 23											SpCas9-NRRH comp. NRRH on 24			AsCas12a RR TYCV on 25
rs1064793015	ABCA4	24	likely-pathogenic		CCCAACCTTCTCTCCACCCCCCAGG<A>TGAGCCCACCACAGGGATGGACCCC	G	From A to G	SpCas9 NGG on 23												SpCas9 (From Strep. past.) NNGTGA on 23			SpCas9-NRCH comp. NRCH on 23								SpCas9-NRTH NGGN on 23 SpCas9-NRCH NGGN on 23	xCas9 NG on 24 SpCas9-NG NG on 24		St3Cas9 NGGNG on 23
rs61753021	ABCA4	24	likely-pathogenic.not-provided	Stargardt disease 1 (STGD1)	TTTGTCCTTTATTTGATCCAGGAGC<G>GGTGAACAAATCCAAGCACCTCCAG	T	From G to T															SpCas9-NRRH comp. NRRH on 24	SpCas9-NRCH NRCH on 22
rs61751392	ABCA4	24	pathogenic.pathogenic-likely-pathogenic.uncertain-significance.likely-pathogenic	Stargardt disease 1 (STGD1). Cone-rod dystrophy 3 (CORD3). Stargardt disease 1 (STGD1). Retinitis pigmentosa (RP). Retinal dystrophy	CAGCTCACCCAACGTGCCCTCTCTC<T>ACTGGAGGAAAACATGTTCTGGGCC	C	From T to C																		AsCas12a RR TYCV on 23						SpCas9-NRTH comp. NGGN on 24 SpCas9-NRCH comp. NGGN on 24	xCas9 comp. NG on 24 SpCas9-NG comp. NG on 24		St3Cas9 comp. NGGNG on 24
rs1064793010	ABCA4	24	likely-pathogenic		GAGGCCGACCTCCTTGGGGACCGCA<T>TGCCATCATTGCCCAGGGAAGGCTC	C	From T to C																SpCas9-NRCH NRCH on 23									xCas9 comp. NG on 24 SpCas9-NG comp. NG on 24
rs1057520213	ABCA4	24	likely-pathogenic		ACCACAGGGATGGACCCCCAGGCAC<G>CCGCATGCTGTGGAACGTCATCGTG	A	From G to A						KKH SaCas9 comp. NNNRRT on 20				CjCas9 NNNVRYM on 19						SpCas9-NRCH NRCH on 22			enAsCas12a comp. TGTV on 25
rs886044752	ABCA4	24	likely-pathogenic	Stargardt disease 1 (STGD1)	AGGAAGCTGCTCATTGTCTTCCCCC<A>CTTCTGCCTGGGCCGGGGCCTCATT	G	From A to G		VRER SpCas9 comp. NGCG on 23																							xCas9 NG on 24 SpCas9-NG NG on 24
rs1064793007	ABCA4	24	likely-pathogenic		TCAGCATGGAAGAATCCTACATTAC<A>GCGACCCATTCATCCTCTTCCTGTT	G	From A to G										CjCas9 comp. NNNVRYM on 19 CjCas9 comp. NNNVRYM on 22		SpCas9-NG NANG on 22												SpCas9-NRTH NGGN on 24 SpCas9-NRCH NGGN on 24	xCas9 NG on 24 SpCas9-NG NG on 24		St3Cas9 NGGNG on 24
rs61748538	ABCA4	24	likely-pathogenic.not-provided	Retinal dystrophy	GCGCTTCATCATCTTCAGCCAGAGA<C>GCGGGGCAAAGACGGTGCGCTATGC	T	From C to T						KKH SaCas9 NNNRRT on 20				CjCas9 comp. NNNVRYM on 19						SpCas9-NRCH comp. NRCH on 22
rs113106943	ABCA4	24	likely-pathogenic.likely-benign.uncertain-significance	Retinitis Pigmentosa. Recessive. Stargardt Disease. Recessive. Macular degeneration. Cone-Rod Dystrophy. Recessive. Stargardt disease 1 (STGD1). Cone/cone-rod dystrophy	CCTTGGCCGGATCATGAATGTGAGC<G>GGGTATGTAAACAGACTGGAGATTT	A	From G to A										CjCas9 NNNVRYM on 19						SpCas9-NRCH NRCH on 22
rs886044753	ABCA4	24	likely-pathogenic	Stargardt disease 1 (STGD1)	CTCATTGACCTTGCACTGAGCCAGG<C>TGTGACAGATGTCTATGCCCGGTTT	A	From C to A				VQR SpCas9 NGAN on 23	SaCas9 NNGRRT on 21	KKH SaCas9 NNNRRT on 21				CjCas9 comp. NNNVRYM on 20		SpCas9-NG NANG on 24			SpCas9-NRRH NRRH on 23											SpCas9-NRTH comp. NRTH on 23
rs61750137	ABCA4	24	pathogenic	Stargardt disease 1 (STGD1)	GACCCTTCACCCCTGGATATATGGG<C>AGCAGTACACCTTCTTCAGGTGCGC	T	From C to T					SaCas9 NNGRRT on 20	KKH SaCas9 NNNRRT on 20																				SpCas9-NRTH NRTH on 23
rs752786160	ABCA4	24	likely-pathogenic		ATTTAACATCACTGATCGCACCCTC<C>GCCTGGTCAATCAATACCTGGAGGT	T	From C to T										CjCas9 comp. NNNVRYM on 19						SpCas9-NRCH comp. NRCH on 22
rs201223321	ABCA4	24	uncertain-significance.likely-pathogenic		TGCTGTCTATGGCTTACTCGCTTGG<T>ACCTTGATCAGGTGTTTCCAGGTAA	C	From T to C										CjCas9 NNNVRYM on 22						SpCas9-NRCH NRCH on 23									xCas9 comp. NG on 24 SpCas9-NG comp. NG on 24		St3Cas9 comp. NGGNG on 21
rs28938473	ABCA4	24	pathogenic.pathogenic-likely-pathogenic.likely-pathogenic.likely-benign	Stargardt disease (FFM). Stargardt disease 1 (STGD1)	CTGTGTTTTCTCCTAGTGCTTTGGC<C>TCCTGGGAGTGAATGGTGCCGGCAA	T	From C to T															SpCas9-NRRH comp. NRRH on 22			AsCas12a RR TYCV on 25		enAsCas12a VTTV on 24	FnCas12a TTV on 25		enAsCas12a TTCN on 25 Cas12e (CasX) TTCN on 25
rs61748536_0	ABCA4	24	likely-pathogenic.benign.likely-benign		TGGCGCTGAAGGACATCGCCTGCAG<C>GAGGCCCTCCTGGAGCGCTTCATCA	G	From C to G	SpCas9 NGG on 23 SpCas9 NGG on 24											SpCas9-NG NANG on 22			SpCas9-NRRH NRRH on 24			AsCas12a RR comp. TYCV on 23						SpCas9-NRRH NGGN on 23 SpCas9-NRTH NGGN on 23 SpCas9-NRCH NGGN on 23 SpCas9-NRRH NGGN on 24 SpCas9-NRTH NGGN on 24 SpCas9-NRCH NGGN on 24	xCas9 NG on 24 SpCas9-NG NG on 24		St3Cas9 NGGNG on 24
rs61748536_1	ABCA4	24	likely-pathogenic.benign.likely-benign		TGGCGCTGAAGGACATCGCCTGCAG<C>GAGGCCCTCCTGGAGCGCTTCATCA	T	From C to T						KKH SaCas9 NNNRRT on 20							SpCas9 (From Strep. past.) NNGTGA on 22
rs376925793	ABCA4	24	likely-pathogenic	Stargardt disease 1 (STGD1)	CCAGGTGAGGAGCACTCTGCAAATC<C>GTTCCACTGGGACCTGATTGGGAAG	T	From C to T										CjCas9 comp. NNNVRYM on 19						SpCas9-NRCH comp. NRCH on 22
rs61751402	ABCA4	24	pathogenic	Stargardt disease 1 (STGD1). Retinal dystrophy	GTCAACCCTTCACCATCCTGCAGGT<G>CAGCACCAGGGAGAAGCTCACCATG	A	From G to A										CjCas9 NNNVRYM on 19									enAsCas12a comp. TGTV on 23							SpCas9-NRTH NRTH on 22 SpCas9-NRTH comp. NRTH on 23
rs145525174	ABCA4	24	likely-benign.likely-pathogenic.uncertain-significance	Stargardt Disease. Recessive. Retinitis Pigmentosa. Recessive. Cone-Rod Dystrophy. Recessive. Macular degeneration. Stargardt disease 1 (STGD1)	GGAAAACATGTTCTGGGCCGGAGTG<G>TATTCCCTGACATGTATCCCTGGAC	A	From G to A				VQR SpCas9 NGAN on 23									SpCas9 (From Strep. past.) NNGTGA on 20				AsCas12a RVR comp. TATV on 23									SpCas9-NRTH comp. NRTH on 23
rs61751408	ABCA4	24	pathogenic	Stargardt disease 1 (STGD1). Cone-rod dystrophy 3 (CORD3). Cone-rod dystrophy 3 (CORD3). Age-related macular degeneration 2 (ARMD2). Stargardt disease 1 (STGD1). Retinitis pigmentosa 19 (RP19)	TCAGTTTGATGCAATTGATGAGCTG<C>TCACAGGACGAGAACATCTTTACCT	T	From C to T															SpCas9-NRRH comp. NRRH on 22			AsCas12a RR TYCV on 25		enAsCas12a VTTV on 24	FnCas12a TTV on 25		enAsCas12a TTCN on 25 Cas12e (CasX) TTCN on 25			SpCas9-NRTH NRTH on 23
rs61748552	ABCA4	24	likely-pathogenic.not-provided	Retinal dystrophy. Stargardt disease 1 (STGD1)	AGATCTGGTACTTCTTTGACAACAG<C>ACACAGATGAACATGATCAGAGTAA	G	From C to G	SpCas9 NGG on 23			VQR SpCas9 NGAN on 24								SpCas9-NG NANG on 22			SpCas9-NRRH NRRH on 23 SpCas9-NRRH NRRH on 24									SpCas9-NRRH NGGN on 23 SpCas9-NRTH NGGN on 23	xCas9 NG on 24 SpCas9-NG NG on 24	SpCas9-NRTH comp. NRTH on 22
rs61750564	ABCA4	24	likely-pathogenic.not-provided		TTCTCCATGTCCTTCGTCCCAGCCA<G>CTTTGTCCTTTATTTGATCCAGGAG	T	From G to T				VQR SpCas9 comp. NGAN on 23		KKH SaCas9 comp. NNNRRT on 21				CjCas9 NNNVRYM on 20		SpCas9-NG comp. NANG on 24			SpCas9-NRRH comp. NRRH on 23											SpCas9-NRTH NRTH on 23
rs140482171	ABCA4	24	uncertain-significance.likely-benign.likely-pathogenic	Stargardt Disease. Recessive. Retinitis Pigmentosa. Recessive. Cone-Rod Dystrophy. Recessive. Macular degeneration. Stargardt disease 1 (STGD1)	TTTAACATCACTGATCGCACCCTCC<G>CCTGGTCAATCAATACCTGGAGGTA	A	From G to A						KKH SaCas9 comp. NNNRRT on 20
rs61750061	ABCA4	24	pathogenic.not-provided	Stargardt disease 1 (STGD1)	TGCCCAGCTGAAAGGAAAGTCCCAG<G>AGGAGGCCCAGCTGGAGATGGAAGC	A	From G to A				VQR SpCas9 NGAN on 23											SpCas9-NRRH NRRH on 22					enAsCas12a comp. VTTV on 23	FnCas12a comp. TTV on 24		enAsCas12a comp. TTCN on 24 Cas12e (CasX) comp. TTCN on 24
rs1047376	ABCA4	24	likely-pathogenic	Stargardt disease 1 (STGD1)	CACCACATGGACGAGGCCGACCTCC<T>TGGGGACCGCATTGCCATCATTGCC	C	From T to C																		AsCas12a RR TYCV on 22						SpCas9-NRRH comp. NGGN on 24 SpCas9-NRTH comp. NGGN on 24 SpCas9-NRCH comp. NGGN on 24	xCas9 comp. NG on 24 SpCas9-NG comp. NG on 24
rs760549861	ABCA4	24	likely-pathogenic	Stargardt disease 1 (STGD1)	AGTTGTCTCATTTCACACAGATGGG<C>GGTCATTCCCATGATGTACCCAGCA	T	From C to T					SaCas9 NNGRRT on 20	KKH SaCas9 NNNRRT on 20
rs141823837	ABCA4	24	likely-pathogenic		TTTAGTTTCATGATCATCCTGAACC<G>CTGTTTCCCTATCTTCATGGTGCTG	A	From G to A						KKH SaCas9 comp. NNNRRT on 20
rs61752391_0	ABCA4	24	pathogenic		GGGAAGAAGTAGGGCCCCAGATCTG<G>TACTTCTTTGACAACAGCACACAGA	A	From G to A				VQR SpCas9 NGAN on 23													AsCas12a RVR comp. TATV on 23									SpCas9-NRTH comp. NRTH on 23
rs61752391_1	ABCA4	24	pathogenic		GGGAAGAAGTAGGGCCCCAGATCTG<G>TACTTCTTTGACAACAGCACACAGA	C	From G to C										CjCas9 comp. NNNVRYM on 21					SpCas9-NRRH comp. NRRH on 23	SpCas9-NRCH NRCH on 23 SpCas9-NRCH comp. NRCH on 24									xCas9 comp. NG on 24 SpCas9-NG comp. NG on 24
rs786205447	ABCA4	24	likely-pathogenic		CGTGAAGAATCTGGTAAAGATTTTT<G>AGCCCTGTGGCCGGCCAGCTGTGGA	T	From G to T											LbCas12a & AsCas12a TTTV on 23				SpCas9-NRRH comp. NRRH on 24						FnCas12a TTV on 24	enAsCas12a TTTT on 22
rs61751384	ABCA4	24	pathogenic-likely-pathogenic.pathogenic.not-provided	Stargardt disease 1 (STGD1). Cone-rod dystrophy 3 (CORD3)	ATCATGGTAAAGGGCGCCTTTCGAT<G>TATGGGCACCATTCAGCATCTCAAG	A	From G to A										CjCas9 NNNVRYM on 19							AsCas12a RVR TATV on 24 AsCas12a RVR comp. TATV on 23 AsCas12a RVR comp. TATV on 25									SpCas9-NRTH NRTH on 22 SpCas9-NRTH comp. NRTH on 23
rs61750135	ABCA4	24	pathogenic.uncertain-significance	Retinal dystrophy. Stargardt disease 1 (STGD1)	ATACCCCGCTTTGACCCTTCACCCC<T>GGATATATGGGCAGCAGTACACCTT	C	From T to C																								SpCas9-NRRH comp. NGGN on 24 SpCas9-NRTH comp. NGGN on 24 SpCas9-NRCH comp. NGGN on 24	xCas9 comp. NG on 24 SpCas9-NG comp. NG on 24		St3Cas9 comp. NGGNG on 24
rs121909204	ABCA4	24	pathogenic	Stargardt disease 1 (STGD1)	GTGGCTGAGCACATGCTGTTCTATG<C>CCAGCTGAAAGGAAAGTCCCAGGAG	T	From C to T				VQR SpCas9 comp. NGAN on 23											SpCas9-NRRH comp. NRRH on 22			AsCas12a RR TYCV on 25	enAsCas12a TGTV on 23							SpCas9-NRTH NRTH on 23
rs61749412	ABCA4	24	pathogenic.likely-pathogenic.not-provided	Stargardt disease 1 (STGD1)	GGAAGATTTCCGGTACATCTGGGGC<G>GGTTTGCCTATCTGCAGGACATGGT	A	From G to A										CjCas9 NNNVRYM on 19						SpCas9-NRCH NRCH on 22
rs371489809	ABCA4	24	likely-pathogenic		ACTGAGCCAGGCTGTGACAGATGTC<T>ATGCCCGGTTTGGTGGGTGGTAGCC	A	From T to A						KKH SaCas9 NNNRRT on 22									SpCas9-NRRH NRRH on 24					enAsCas12a comp. VTTV on 23	FnCas12a comp. TTV on 24
rs62645952	ABCA4	24	pathogenic.not-provided	Cone-rod dystrophy 3 (CORD3)	CAACGTGGACTTCTTCAAGCTCTTC<C>GTGTGGTAAGGGAGGGGTTTGGCTG	T	From C to T										CjCas9 comp. NNNVRYM on 19						SpCas9-NRCH comp. NRCH on 22			enAsCas12a TGTV on 25
rs886044762	ABCA4	24	likely-pathogenic	Stargardt disease 1 (STGD1)	GGCTATATCGTCACAATGAAGATCA<A>ATCCCCGAAGGACGACCTGCTTCCT	G	From A to G				VQR SpCas9 NGAN on 24						CjCas9 comp. NNNVRYM on 19															xCas9 NG on 24 SpCas9-NG NG on 24
rs778747291	ABCA4	24	likely-pathogenic		GATCCAGGAGCGGGTGAACAAATCC<A>AGCACCTCCAGTTTATCAGTGGAGT	C	From A to C	SpCas9 comp. NGG on 24																							SpCas9-NRRH comp. NGGN on 24 SpCas9-NRTH comp. NGGN on 24 SpCas9-NRCH comp. NGGN on 24	xCas9 comp. NG on 24 SpCas9-NG comp. NG on 24
rs145961131	ABCA4	24	pathogenic	Stargardt disease 1 (STGD1)	GGCTCCAGTTGGAATCTACCTCCAG<C>AGATGCCCTACCCCTGCTTCGTGGA	T	From C to T						KKH SaCas9 NNNRRT on 20																				SpCas9-NRTH NRTH on 23
rs62645957	ABCA4	24	pathogenic.not-provided	Stargardt disease 1 (STGD1)	TACAGCTTTTGCTCTGGAAGAACTG<G>ACCCTGCGGAAAAGGCAAAAGGTAA	A	From G to A				VQR SpCas9 NGAN on 23																enAsCas12a comp. VTTV on 23	FnCas12a comp. TTV on 24		enAsCas12a comp. TTCN on 24 Cas12e (CasX) comp. TTCN on 24
rs61749448	ABCA4	24	likely-pathogenic		CTGAACATCACCTTCTACGAGAACC<A>GATCACCGCATTCCTGGGCCACAAT	G	From A to G					SaCas9 NNGRRT on 23													AsCas12a RR comp. TYCV on 23						SpCas9-NRTH NGGN on 24 SpCas9-NRCH NGGN on 24	xCas9 NG on 24 SpCas9-NG NG on 24
rs61751404	ABCA4	24	pathogenic.likely-pathogenic.uncertain-significance	Retinal dystrophy. Stargardt disease 1 (STGD1). Leber congenital amaurosis (LCA)	CAATGTGGCCCACAACGCCATCTTA<C>GGGCCAGCCTGCCTAAGGACAGGAG	T	From C to T																	AsCas12a RVR TATV on 23
rs886044764	ABCA4	24	likely-pathogenic	Stargardt disease 1 (STGD1)	CTCATCGAGGAGTACTCAGTCACAC<A>GACCACACTGGACCAGGCAAGTTGG	G	From A to G												SpCas9-NG NANG on 22						AsCas12a RR comp. TYCV on 23						SpCas9-NRTH NGGN on 24 SpCas9-NRCH NGGN on 24	xCas9 NG on 24 SpCas9-NG NG on 24
rs148460146	ABCA4	24	likely-pathogenic		CATCTTTACCTTTATGCCCGGCTTC<G>AGGTGTACCAGCAGAAGAAATCGAA	A	From G to A																				enAsCas12a comp. VTTV on 23	FnCas12a comp. TTV on 24
rs886039882	ABCA4	24	likely-pathogenic	Cone-rod dystrophy 3 (CORD3)	CTGGTACTTCTTTGACAACAGCACA<C>AGATGAACATGATCAGAGTAAGGGG	T	From C to T																	AsCas12a RVR comp. TATV on 24									SpCas9-NRTH NRTH on 23
rs61753034	ABCA4	24	pathogenic.not-provided	Stargardt disease (FFM)	GTTTTCTCCTAGTGCTTTGGCCTCC<T>GGGAGTGAATGGTGCCGGCAAAACA	G	From T to G	SpCas9 NGG on 24																	AsCas12a RR TYCV on 22						SpCas9-NRRH NGGN on 24 SpCas9-NRTH NGGN on 24 SpCas9-NRCH NGGN on 24	xCas9 NG on 24 SpCas9-NG NG on 24		St3Cas9 NGGNG on 24
rs61752424	ABCA4	24	likely-pathogenic.not-provided	Stargardt disease 1 (STGD1)	AGCCTTTTCAGAGAGCTGGAGGAGA<C>GCTGGCTGACCTTGGTCTCAGCAGT	T	From C to T						KKH SaCas9 NNNRRT on 20				CjCas9 comp. NNNVRYM on 19						SpCas9-NRCH comp. NRCH on 22
rs61750563	ABCA4	24	likely-pathogenic		CTGCGTGATTTTCTCCATGTCCTTC<G>TCCCAGCCAGCTTTGTCCTTTATTT	A	From G to A					SaCas9 comp. NNGRRT on 20	KKH SaCas9 comp. NNNRRT on 20
rs121909206	ABCA4	24	pathogenic		TACACTTCTCCAGAAAACCTTCCTG<C>CCTTGTGGCACTGCTCCTGCTGTAT	T	From C to T				VQR SpCas9 comp. NGAN on 23											SpCas9-NRRH comp. NRRH on 22				enAsCas12a TGTV on 23							SpCas9-NRTH NRTH on 23
rs61750152	ABCA4	24	pathogenic.likely-pathogenic	Stargardt disease 1 (STGD1). Retinitis pigmentosa 19 (RP19). Inborn genetic diseases	AGCACGGAAATTCTACAAGACCTGA<C>GGACAGGAACATCTCCGACTTCTTG	T	From C to T						KKH SaCas9 NNNRRT on 20
rs758835368	ABCA4	24	uncertain-significance.likely-pathogenic	Stargardt disease 1 (STGD1)	CTTGTCTTCCATGAGGGAGTACCCC<T>GTGGCAACTCAACACCCTGGAAGAC	C	From T to C												SpCas9-NG comp. NANG on 22												SpCas9-NRRH comp. NGGN on 24 SpCas9-NRTH comp. NGGN on 24 SpCas9-NRCH comp. NGGN on 24	xCas9 comp. NG on 24 SpCas9-NG comp. NG on 24		St3Cas9 comp. NGGNG on 24
rs61749428	ABCA4	24	likely-pathogenic.not-provided	Stargardt disease 1 (STGD1)	TCCAAGGCCAGTCTGGCAGCAGCCT<G>TAGTGGTGTCATCTATTTCACCCTC	A	From G to A																	AsCas12a RVR TATV on 24 AsCas12a RVR comp. TATV on 23									SpCas9-NRTH comp. NRTH on 23
rs779426136	ABCA4	24	uncertain-significance.pathogenic	ABCA4-Related Disorders	GGACGAGGCCGACCTCCTTGGGGAC<C>GCATTGCCATCATTGCCCAGGGAAG	T	From C to T																SpCas9-NRCH comp. NRCH on 22
rs61753028	ABCA4	24	likely-pathogenic.not-provided	Stargardt disease 1 (STGD1)	ACTTCTCCAGAAAACCTTCCTGCCC<T>TGTGGCACTGCTCCTGCTGTATGGG	C	From T to C																								SpCas9-NRRH comp. NGGN on 24 SpCas9-NRTH comp. NGGN on 24 SpCas9-NRCH comp. NGGN on 24	xCas9 comp. NG on 24 SpCas9-NG comp. NG on 24		St3Cas9 comp. NGGNG on 24
rs149071415	ABCA4	24	likely-pathogenic	Retinal dystrophy	TGCGTGAAGAATCTGGTAAAGATTT<T>TGAGCCCTGTGGCCGGCCAGCTGTG	C	From T to C				VQR SpCas9 comp. NGAN on 24				St1Cas9 comp. NNRGAAW on 22			LbCas12a & AsCas12a TTTV on 22										FnCas12a TTV on 23		enAsCas12a TTCN on 23 Cas12e (CasX) TTCN on 23		xCas9 comp. NG on 24 SpCas9-NG comp. NG on 24
rs886044755	ABCA4	24	likely-pathogenic	Stargardt disease 1 (STGD1)	ACTGACATCTTAAGGCTACATGAAC<T>AACCAAGGTAAGGGAATGGGTATGA	C	From T to C										CjCas9 NNNVRYM on 19														SpCas9-NRTH comp. NGGN on 24 SpCas9-NRCH comp. NGGN on 24	xCas9 comp. NG on 24 SpCas9-NG comp. NG on 24
rs62642564	ABCA4	24	pathogenic.likely-pathogenic.not-provided.uncertain-significance.likely-benign	Retinitis Pigmentosa. Recessive. Cone-Rod Dystrophy. Recessive. Stargardt Disease. Recessive. Macular degeneration. Stargardt disease 1 (STGD1). Macular dystrophy	ACAGGGATGGACCCCCAGGCACGCC<G>CATGCTGTGGAACGTCATCGTGAGC	A	From G to A																			enAsCas12a comp. TGTV on 23
rs1801581	ABCA4	24	pathogenic.likely-benign.benign.not-provided.risk-factor		GTAAAGATTTTTGAGCCCTGTGGCC<G>GCCAGCTGTGGACCGTCTGAACATC	T	From G to T												SpCas9-NG comp. NANG on 24
rs56357060	ABCA4	24	likely-pathogenic.not-provided.uncertain-significance	Stargardt disease 1 (STGD1)	TGAGCAGTTCACGGTACTTGCAGAC<G>TCCTCCTGAATAAGCCAGGCTTTGG	A	From G to A					SaCas9 comp. NNGRRT on 20	KKH SaCas9 comp. NNNRRT on 20				CjCas9 NNNVRYM on 19						SpCas9-NRCH NRCH on 22			enAsCas12a comp. TGTV on 25
rs886044759	ABCA4	24	likely-pathogenic	Stargardt disease 1 (STGD1)	GGCACGTACAGTGGGGGCAACAAGC<G>GAAACTCTCCACAGCCATCGCACTC	A	From G to A										CjCas9 NNNVRYM on 19						SpCas9-NRCH NRCH on 22
rs61750648	ABCA4	24	pathogenic.likely-pathogenic	Stargardt disease 1 (STGD1)	CACCACAGGGATGGACCCCCAGGCA<C>GCCGCATGCTGTGGAACGTCATCGT	T	From C to T										CjCas9 comp. NNNVRYM on 19						SpCas9-NRCH comp. NRCH on 22
rs374343397	ABCA4	24	likely-pathogenic	Stargardt disease 1 (STGD1)	GCGGGTGAACAAATCCAAGCACCTC<C>AGTTTATCAGTGGAGTGAGCCCCAC	A	From C to A												SpCas9-NG NANG on 24								enAsCas12a comp. VTTV on 23	FnCas12a comp. TTV on 24
rs1435203678	ABCA4	24	likely-pathogenic		TCTCCATGTCCTTCGTCCCAGCCAG<C>TTTGTCCTTTATTTGATCCAGGAGC	T	From C to T						KKH SaCas9 NNNRRT on 20			TdCas9 comp. NAAAAC on 21						SpCas9-NRRH comp. NRRH on 22							enAsCas12a TTTT on 25				SpCas9-NRTH NRTH on 23
rs61749451	ABCA4	24	likely-pathogenic.not-provided		CACAATGGAGCTGGGAAAACCACCA<C>CTTGTGAGTCTTCCAGCAGAGAAGC	T	From C to T				VQR SpCas9 comp. NGAN on 23											SpCas9-NRRH comp. NRRH on 22											SpCas9-NRTH NRTH on 23
rs367857935	ABCA4	24	likely-pathogenic	Stargardt disease 1 (STGD1)	ACAGTCCTACTTCTCTGTTTCAGAC<G>CTGCTCAGGTTCAACGCCGTGCTGA	A	From G to A						KKH SaCas9 comp. NNNRRT on 20				CjCas9 NNNVRYM on 19						SpCas9-NRCH NRCH on 22			enAsCas12a comp. TGTV on 25
rs1131691351	ABCA4	24	likely-pathogenic		GGTGGTGATTCTGGACGAACCCACC<T>CTGGGGTGGACCCTTACTCGAGACG	C	From T to C	SpCas9 comp. NGG on 23				SaCas9 comp. NNGRRT on 23							SpCas9-NG comp. NANG on 22												SpCas9-NRRH comp. NGGN on 23 SpCas9-NRTH comp. NGGN on 23 SpCas9-NRCH comp. NGGN on 23 SpCas9-NRRH comp. NGGN on 24 SpCas9-NRTH comp. NGGN on 24 SpCas9-NRCH comp. NGGN on 24	xCas9 comp. NG on 24 SpCas9-NG comp. NG on 24		St3Cas9 comp. NGGNG on 23
rs61753046_0	ABCA4	24	pathogenic		CTCCTCCTCCCTGGCGAGGATCTTC<C>AGCTCCTCCTCTCCCACAAGGACAG	A	From C to A												SpCas9-NG NANG on 24								enAsCas12a comp. VTTV on 23	FnCas12a comp. TTV on 24
rs61751383	ABCA4	24	pathogenic	Retinal dystrophy. early-onset severe. Retinal dystrophy. Stargardt disease 1 (STGD1). Cone-rod dystrophy 3 (CORD3). Age-related macular degeneration 2 (ARMD2). Stargardt disease 1 (STGD1). Retinitis pigmentosa 19 (RP19)	TGCAATTGATGAGCTGCTCACAGGA<C>GAGAACATCTTTACCTTTATGCCCG	T	From C to T					SaCas9 NNGRRT on 20	KKH SaCas9 NNNRRT on 20
rs886044763	ABCA4	24	pathogenic	Stargardt disease 1 (STGD1)	TTCCAGGTCTCCTCCTCCTCCCTGG<C>GAGGATCTTCCAGCTCCTCCTCTCC	T	From C to T						KKH SaCas9 NNNRRT on 20							SpCas9 (From Strep. past.) NNGTGA on 22
rs1131691612	ABCA4	24	pathogenic		CATTATTTTATTTTGGCTTTCAGCT<T>AAAGAGCAAATTCTGGGTCAATGAA	A	From T to A											LbCas12a & AsCas12a comp. TTTV on 23				SpCas9-NRRH NRRH on 24						FnCas12a comp. TTV on 24	enAsCas12a comp. TTTT on 22
rs201738997	ABCA4	24	pathogenic	Stargardt disease 1 (STGD1). Stargardt disease 1 (STGD1)	ATCTGGTCTTCGTGTGGTCATTAGC<A>TGGGCTTCGTGAGACAGATACAGCT	G	From A to G		VRER SpCas9 NGCG on 22																							xCas9 NG on 24 SpCas9-NG NG on 24
rs886044754	ABCA4	24	likely-pathogenic	Stargardt disease 1 (STGD1)	GAACCTGTTTGCCATGGTGGTGGAA<G>GGGTGGTGTACTTCCTCCTGACCCT	A	From G to A								St1Cas9 NNRGAAW on 19			LbCas12a & AsCas12a comp. TTTV on 25				SpCas9-NRRH NRRH on 22
rs121909207	ABCA4	24	pathogenic		ATGGGCGGTCATTCCCATGATGTAC<C>CAGCATCCTTCCTGTTTGATGTCCC	T	From C to T			EQR SpCas9 comp. NGAG on 23	VQR SpCas9 comp. NGAN on 23
rs281865402	ABCA4	24	not-provided.uncertain-significance.likely-pathogenic	Retinal dystrophy	GGTGCCGGGGGCCTCCCGCCCCCCC<A>GGTACCTGACCTCCAAACAACGGGG	G	From A to G					SaCas9 NNGRRT on 23																			SpCas9-NRRH NGGN on 24 SpCas9-NRTH NGGN on 24 SpCas9-NRCH NGGN on 24	xCas9 NG on 24 SpCas9-NG NG on 24
rs786205446	ABCA4	24	likely-pathogenic		AGATGTCCTCTCCACCCTCTAGGTG<T>GGTTTAATAACAAAGGCTGGCATGC	A	From T to A			EQR SpCas9 NGAG on 23	VQR SpCas9 NGAN on 23								SpCas9-NG NANG on 24	SpCas9 (From Strep. past.) NNGTGA on 20
rs61749438	ABCA4	24	pathogenic.not-provided		CTGCTGTCTATGGCTTACTCGCTTG<G>TACCTTGATCAGGTGTTTCCAGGTA	T	From G to T										CjCas9 comp. NNNVRYM on 21					SpCas9-NRRH comp. NRRH on 23	SpCas9-NRCH comp. NRCH on 24				enAsCas12a VTTV on 24	FnCas12a TTV on 25					SpCas9-NRTH NRTH on 23
rs61752425	ABCA4	24	pathogenic.not-provided	Stargardt disease 1 (STGD1)	TTTTGGAATTTCTGACACTCCCCTG<G>AAGAGGTAAAGTAGAGATTCCAGCT	T	From G to T																SpCas9-NRCH comp. NRCH on 24			enAsCas12a TGTV on 23							SpCas9-NRTH NRTH on 23
rs794727903	ABCA4	24	pathogenic	Cone-rod dystrophy 3 (CORD3)	CTAGTTTATCCATCGGCCGAGTATG<C>AGGACTTGCTGTGGGTGACCAGGCC	T	From C to T																			enAsCas12a TGTV on 23							SpCas9-NRTH NRTH on 23
rs61750571	ABCA4	24	pathogenic		TGAGTTGTCTCATTTCACACAGATG<G>GCGGTCATTCCCATGATGTACCCAG	A	From G to A			EQR SpCas9 NGAG on 23	VQR SpCas9 NGAN on 23
rs61749433	ABCA4	24	pathogenic.not-provided		TGAAGAGCAAGGCCTGGGGCTGCAG<T>GGAGCAACATCGGGAACAGTCCCAC	A	From T to A			EQR SpCas9 NGAG on 23	VQR SpCas9 NGAN on 23								SpCas9-NG NANG on 24
rs61752423_0	ABCA4	24	pathogenic		TGCCAGCCTTTTCAGAGAGCTGGAG<G>AGACGCTGGCTGACCTTGGTCTCAG	C	From G to C										CjCas9 NNNVRYM on 20					SpCas9-NRRH NRRH on 22	SpCas9-NRCH NRCH on 23 SpCas9-NRCH comp. NRCH on 24									xCas9 comp. NG on 24 SpCas9-NG comp. NG on 24
rs61752423_1	ABCA4	24	pathogenic		TGCCAGCCTTTTCAGAGAGCTGGAG<G>AGACGCTGGCTGACCTTGGTCTCAG	T	From G to T					SaCas9 NNGRRT on 20	KKH SaCas9 NNNRRT on 20				CjCas9 NNNVRYM on 20					SpCas9-NRRH NRRH on 22	SpCas9-NRCH comp. NRCH on 24										SpCas9-NRTH NRTH on 23
rs1762111	ABCA4	24	pathogenic.uncertain-significance.likely-pathogenic	ABCA4-Related Disorders. Cone-Rod Dystrophy. Recessive. Retinitis Pigmentosa. Recessive. Stargardt disease 1 (STGD1). Retinal dystrophy	CTTGTCAGGTATGGAGGAATTTCCA<T>TGGAGGAAAGCTCCCAGTCGTCCCC	C	From T to C																SpCas9-NRCH NRCH on 23									xCas9 comp. NG on 24 SpCas9-NG comp. NG on 24
rs62654395	ABCA4	24	likely-pathogenic.not-provided		CCCAACAAGGCGATGCCCTCAGCAG<G>AATGCTGCCGTGGCTCCAGGGGATC	T	From G to T						KKH SaCas9 NNNRRT on 20				CjCas9 NNNVRYM on 20					SpCas9-NRRH NRRH on 22	SpCas9-NRCH comp. NRCH on 24										SpCas9-NRTH NRTH on 23
rs61751420	ABCA4	24	likely-pathogenic.uncertain-significance		TGGCTCTCGGGTGCTCTCCTTCAAC<T>GGTATGAAGACAATAACTATAAGGC	G	From T to G	SpCas9 NGG on 24				SaCas9 NNGRRT on 23							SpCas9-NG NANG on 22												SpCas9-NRRH NGGN on 24 SpCas9-NRTH NGGN on 24 SpCas9-NRCH NGGN on 24	xCas9 NG on 24 SpCas9-NG NG on 24
rs1064793008	ABCA4	24	likely-pathogenic		ACTGCCACCATCATGCTGTGCTTTC<T>GCTCAGCACCTTCTTCTCCAAGGCC	C	From T to C		VRER SpCas9 comp. NGCG on 22																AsCas12a RR TYCV on 22 AsCas12a RR TYCV on 23						SpCas9-NRTH comp. NGGN on 24 SpCas9-NRCH comp. NGGN on 24	xCas9 comp. NG on 24 SpCas9-NG comp. NG on 24
rs62645958	ABCA4	24	likely-pathogenic.not-provided.likely-benign.uncertain-significance	Macular degeneration. Cone-Rod Dystrophy. Recessive. Stargardt Disease. Recessive. Retinitis Pigmentosa. Recessive	CTTTTTGTTTTGTTTTTCCAGATTC<G>CTTTGTGGTGGAACTCGTGTGGCCT	A	From G to A						KKH SaCas9 comp. NNNRRT on 20							SpCas9 (From Strep. past.) comp. NNGTGA on 22
rs768278935	ABCA4	24	likely-pathogenic	Stargardt disease 1 (STGD1)	ACAGGCTTGTACTTAACCTTGGTGC<G>CAAGATGAAAAACATCCAGAGCCAA	A	From G to A																SpCas9-NRCH NRCH on 22			enAsCas12a comp. TGTV on 23
rs886041951	ABCA4	24	pathogenic		ATTATCTGATATGTCACCAAGAATT<C>AAGAGGTGAGTAGCCTGATGGTAGT	G	From C to G				VQR SpCas9 NGAN on 24											SpCas9-NRRH NRRH on 24			AsCas12a RR comp. TYCV on 23					enAsCas12a comp. TTCN on 23 Cas12e (CasX) comp. TTCN on 23		xCas9 NG on 24 SpCas9-NG NG on 24
rs575453437	ABCA4	24	likely-pathogenic	Stargardt disease 1 (STGD1)	TGTCTCCATGACTGTGAAGAGCATC<G>TCTTGGAGAAGGAGTTGCGACTGAA	A	From G to A						KKH SaCas9 comp. NNNRRT on 20
rs1800552	ABCA4	24	uncertain-significance.likely-pathogenic	Stargardt disease 1 (STGD1). Inborn genetic diseases	TTCCTCCTGACCCTGCTGGTCCAGC<G>CCACTTCTTCCTCTCCCAATGGTAC	A	From G to A						KKH SaCas9 comp. NNNRRT on 20				CjCas9 NNNVRYM on 19						SpCas9-NRCH NRCH on 22
rs61748537	ABCA4	24	conflicting-interpretations-of-pathogenicity.likely-pathogenic	Stargardt disease 1 (STGD1)	GAGCGCTTCATCATCTTCAGCCAGA<G>ACGCGGGGCAAAGACGGTGCGCTAT	C	From G to C										CjCas9 NNNVRYM on 20					SpCas9-NRRH NRRH on 22	SpCas9-NRCH NRCH on 23			enAsCas12a comp. TGTV on 24						xCas9 comp. NG on 24 SpCas9-NG comp. NG on 24	SpCas9-NRTH comp. NRTH on 24
rs61751403	ABCA4	24	pathogenic.likely-pathogenic	Stargardt disease 1 (STGD1). Retinal dystrophy	AATGTGGCCCACAACGCCATCTTAC<G>GGCCAGCCTGCCTAAGGACAGGAGC	A	From G to A																SpCas9-NRCH NRCH on 22			enAsCas12a comp. TGTV on 25
rs61752390_0	ABCA4	24	pathogenic.not-provided		CAAGGAAGGATCCTATCTATTCTTA<T>GACAGAAGAACAAGTAAGTTTTCTG	G	From T to G	SpCas9 NGG on 24														SpCas9-NRRH NRRH on 24									SpCas9-NRRH NGGN on 24 SpCas9-NRTH NGGN on 24 SpCas9-NRCH NGGN on 24	xCas9 NG on 24 SpCas9-NG NG on 24
rs61752390_1	ABCA4	24	pathogenic.not-provided		CAAGGAAGGATCCTATCTATTCTTA<T>GACAGAAGAACAAGTAAGTTTTCTG	C	From T to C																									xCas9 comp. NG on 24 SpCas9-NG comp. NG on 24
rs62645944	ABCA4	24	pathogenic	Stargardt disease 1 (STGD1). Retinitis pigmentosa 19 (RP19). Cone-rod dystrophy 3 (CORD3). Age-related macular degeneration 2 (ARMD2). Stargardt disease 1 (STGD1). Retinitis pigmentosa 19 (RP19)	TGGACTTCTTCAAGCTCTTCCGTGT<G>GTAAGGGAGGGGTTTGGCTGCTCGC	T	From G to T															SpCas9-NRRH comp. NRRH on 24				enAsCas12a TGTV on 25	enAsCas12a VTTV on 23	FnCas12a TTV on 24					SpCas9-NRTH NRTH on 22
rs201471607	ABCA4	24	pathogenic	Stargardt disease 1 (STGD1)	CAGATCACCGCATTCCTGGGCCACA<A>TGGAGCTGGGAAAACCACCACCTTG	G	From A to G																SpCas9-NRCH comp. NRCH on 23									xCas9 NG on 24 SpCas9-NG NG on 24
rs1297857869	ABCA4	24	likely-pathogenic	Stargardt disease 1 (STGD1)	AAGCTGCTCATTGTCTTCCCCCACT<T>CTGCCTGGGCCGGGGCCTCATTGAC	C	From T to C	SpCas9 comp. NGG on 23		EQR SpCas9 comp. NGAG on 24	VQR SpCas9 comp. NGAN on 24	SaCas9 comp. NNGRRT on 23							SpCas9-NG comp. NANG on 22												SpCas9-NRTH comp. NGGN on 23 SpCas9-NRCH comp. NGGN on 23	xCas9 comp. NG on 24 SpCas9-NG comp. NG on 24		St3Cas9 comp. NGGNG on 23
rs886044725	ABCA4	24	pathogenic	Stargardt disease 1 (STGD1)	ACGTTAGGAAGTTGGTCAAAGCCTG<G>GAAGAAGTAGGGCCCCAGATCTGGT	A	From G to A			EQR SpCas9 NGAG on 23	VQR SpCas9 NGAN on 23
rs62642562	ABCA4	24	likely-pathogenic.not-provided		GAGGAAGCTGCTCATTGTCTTCCCC<C>ACTTCTGCCTGGGCCGGGGCCTCAT	T	From C to T										CjCas9 comp. NNNVRYM on 19																SpCas9-NRTH comp. NRTH on 22
rs794726979	ABCA4	24	likely-pathogenic.pathogenic	Stargardt disease 1 (STGD1)	GTCTGGTTTTAGGCCAACTCAACTT<T>TGAAGAACTGGAACACGTTAGGAAG	C	From T to C				VQR SpCas9 comp. NGAN on 24																enAsCas12a VTTV on 22	FnCas12a TTV on 23		enAsCas12a TTCN on 23 Cas12e (CasX) TTCN on 23		xCas9 comp. NG on 24 SpCas9-NG comp. NG on 24
rs61750065	ABCA4	24	likely-pathogenic		CCAGGTGGCATGCAGAGAAAGCTGT<C>GGTTGCCATTGCCTTTGTGGGAGAT	T	From C to T																				enAsCas12a VTTV on 23	FnCas12a TTV on 24
rs886044746	ABCA4	24	likely-pathogenic	Stargardt disease 1 (STGD1)	TATGGAATCACCGTCATTAGCCAAC<C>CCTGAACCTGACCAAGGAGCAGCTC	T	From C to T			EQR SpCas9 comp. NGAG on 23	VQR SpCas9 comp. NGAN on 23											SpCas9-NRRH comp. NRRH on 22
rs62642573_0	ABCA4	24	pathogenic.likely-pathogenic.not-provided	Stargardt disease 1 (STGD1)	TTCTATTGTTATCCCTCCTTTTGGC<G>AATACCCCGCTTTGACCCTTCACCC	A	From G to A										CjCas9 NNNVRYM on 19	LbCas12a & AsCas12a comp. TTTV on 23					SpCas9-NRCH NRCH on 22					FnCas12a comp. TTV on 24
rs62642573_1	ABCA4	24	pathogenic.likely-pathogenic.not-provided	Stargardt disease 1 (STGD1)	TTCTATTGTTATCCCTCCTTTTGGC<G>AATACCCCGCTTTGACCCTTCACCC	T	From G to T															SpCas9-NRRH comp. NRRH on 24	SpCas9-NRCH NRCH on 22
rs61753038	ABCA4	24	pathogenic.not-provided	Cone-rod dystrophy 3 (CORD3). Age-related macular degeneration 2 (ARMD2). Stargardt disease 1 (STGD1). Retinitis pigmentosa 19 (RP19)	ACATCTTTACCTTTATGCCCGGCTT<C>GAGGTGTACCAGCAGAAGAAATCGA	T	From C to T											LbCas12a & AsCas12a TTTV on 23										FnCas12a TTV on 24
rs1085307968	ABCA4	24	likely-pathogenic		GGTGTGGTTTAATAACAAAGGCTGG<C>ATGCCCTGGTCAGCTTTCTCAATGT	T	From C to T						KKH SaCas9 NNNRRT on 20				CjCas9 comp. NNNVRYM on 19							AsCas12a RVR TATV on 25									SpCas9-NRTH NRTH on 23 SpCas9-NRTH comp. NRTH on 22
rs1057517869	ABCA4	24	pathogenic		AAAGCTGGTGGAGTGCATTGGTCAA<G>AACTTATCTTCCTTCTTCCAAATAA	T	From G to T						KKH SaCas9 NNNRRT on 20				CjCas9 NNNVRYM on 20					SpCas9-NRRH NRRH on 22											SpCas9-NRTH NRTH on 23 SpCas9-NRTH comp. NRTH on 24
rs1064797091	ABCA4	24	likely-pathogenic		GAATACCCCGCTTTGACCCTTCACC<C>CTGGATATATGGGCAGCAGTACACC	T	From C to T			EQR SpCas9 comp. NGAG on 23	VQR SpCas9 comp. NGAN on 23											SpCas9-NRRH comp. NRRH on 22
rs886044738	ABCA4	24	likely-pathogenic	Stargardt disease 1 (STGD1)	TCTCTCTTTTTTTCTTCTTGACAGA<T>TTTTCTGAAGGTCACGGAGGATTCT	C	From T to C												SpCas9-NG comp. NANG on 22				SpCas9-NRCH NRCH on 23									xCas9 comp. NG on 24 SpCas9-NG comp. NG on 24
rs1800553	ABCA4	24	pathogenic.pathogenic-likely-pathogenic.likely-pathogenic.risk-factor	MACULAR DEGENERATION. AGE-RELATED. 2. SUSCEPTIBILITY TO. Stargardt disease 1 (STGD1). Cone-rod dystrophy 3 (CORD3). Stargardt disease 1 (STGD1). ABCA4-Related Disorders. Macular dystrophy. Retinal dystrophy. Inborn genetic diseases. Age-related macular degeneration 2 (ARMD2)	CCAGCAGTGGACAGGCTGTGTGTCG<G>AGTTCGCCCTGGAGAGGTGGGTACT	A	From G to A				VQR SpCas9 NGAN on 23																enAsCas12a comp. VTTV on 23	FnCas12a comp. TTV on 24		enAsCas12a comp. TTCN on 24 Cas12e (CasX) comp. TTCN on 24
rs748706582	ABCA4	24	likely-pathogenic		CACAGATGGGCGGTCATTCCCATGA<T>GTACCCAGCATCCTTCCTGTTTGAT	C	From T to C										CjCas9 NNNVRYM on 22		SpCas9-NG comp. NANG on 22													xCas9 comp. NG on 24 SpCas9-NG comp. NG on 24
rs886044728	ABCA4	24	likely-pathogenic	Stargardt disease 1 (STGD1)	CCCACGTGAAGTATAAGATCCGAAT<G>GACATAGACGTGGTGGAGAAAACCA	A	From G to A										CjCas9 NNNVRYM on 19																SpCas9-NRTH NRTH on 22
rs61749437	ABCA4	24	likely-pathogenic.not-provided.uncertain-significance	Stargardt disease 1 (STGD1)	TGATGCTGCTGTCTATGGCTTACTC<G>CTTGGTACCTTGATCAGGTGTTTCC	A	From G to A						KKH SaCas9 comp. NNNRRT on 20							SpCas9 (From Strep. past.) comp. NNGTGA on 22
rs61749454	ABCA4	24	likely-pathogenic.uncertain-significance	Stargardt disease 1 (STGD1)	CCACCAACCTCTGGGACTGTGCTCG<T>TGGGGGAAGGGACATTGAAACCAGC	C	From T to C		VRER SpCas9 comp. NGCG on 24														SpCas9-NRCH NRCH on 23									xCas9 comp. NG on 24 SpCas9-NG comp. NG on 24
rs61751395	ABCA4	24	likely-pathogenic.pathogenic	Stargardt disease 1 (STGD1)	AGTCTGGCAGCAGCCTGTAGTGGTG<T>CATCTATTTCACCCTCTACCTGCCA	A	From T to A				VQR SpCas9 NGAN on 23						CjCas9 NNNVRYM on 21			SpCas9 (From Strep. past.) NNGTGA on 20		SpCas9-NRRH NRRH on 23	SpCas9-NRCH NRCH on 24			enAsCas12a comp. TGTV on 23							SpCas9-NRTH comp. NRTH on 23
rs746541266	ABCA4	24	pathogenic	Stargardt disease 1 (STGD1)	TCAATCTCTCAAAACAGGTGGCGCT<C>AGCAGAAAAGAGAAAACGTCAACCC	T	From C to T																				enAsCas12a VTTV on 23	FnCas12a TTV on 24
rs886044719	ABCA4	24	likely-pathogenic	Stargardt disease 1 (STGD1)	TTCCAGATTCGCTTTGTGGTGGAAC<T>CGTGTGGCCTTTATCTTTATTTCTG	G	From T to G		VRER SpCas9 NGCG on 24 VRER SpCas9 comp. NGCG on 23										SpCas9-NG NANG on 22													xCas9 NG on 24 SpCas9-NG NG on 24
rs886044761	ABCA4	24	likely-pathogenic	Stargardt disease 1 (STGD1)	ATGGACCCCCAGGCACGCCGCATGC<T>GTGGAACGTCATCGTGAGCATCATC	C	From T to C												SpCas9-NG comp. NANG on 22												SpCas9-NRTH comp. NGGN on 24 SpCas9-NRCH comp. NGGN on 24	xCas9 comp. NG on 24 SpCas9-NG comp. NG on 24
rs61750121	ABCA4	24	likely-pathogenic.not-provided		ATCTGGGATCTGCTCCTGAAGTATC<G>CTCAGGTAACAGCTGCTGCTCAGTC	A	From G to A					SaCas9 comp. NNGRRT on 20	KKH SaCas9 comp. NNNRRT on 20							SpCas9 (From Strep. past.) comp. NNGTGA on 22
rs61751394	ABCA4	24	likely-pathogenic		TATCTGCAGGACATGGTTGAACAGG<G>GATCACAAGGAGCCAGGTGCAGGCG	A	From G to A			EQR SpCas9 NGAG on 23	VQR SpCas9 NGAN on 23											SpCas9-NRRH NRRH on 22
rs746566873	ABCA4	24	likely-pathogenic	Stargardt disease 1 (STGD1)	TTAGGAGACTATGGAACCCCACTTC<C>TTGGTACTTTCTTCTACAAGAGTCG	T	From C to T											LbCas12a & AsCas12a TTTV on 25				SpCas9-NRRH comp. NRRH on 22
rs765429911_0	ABCA4	24	pathogenic		TCCTTACAGCTTGGCAAGGGTATAT<C>GAGATTTTCAAGAACTCCTCATGAA	G	From C to G	SpCas9 NGG on 24											SpCas9-NG NANG on 22			SpCas9-NRRH NRRH on 24			AsCas12a RR comp. TYCV on 23						SpCas9-NRRH NGGN on 24 SpCas9-NRTH NGGN on 24 SpCas9-NRCH NGGN on 24	xCas9 NG on 24 SpCas9-NG NG on 24		St3Cas9 NGGNG on 24
rs765429911_1	ABCA4	24	pathogenic		TCCTTACAGCTTGGCAAGGGTATAT<C>GAGATTTTCAAGAACTCCTCATGAA	T	From C to T																				enAsCas12a VTTV on 23	FnCas12a TTV on 24
rs794727531	ABCA4	24	pathogenic		AAACATCACCCAGCTGTTCCAGAAG<C>AGAAATGGACACAGGTCAACCCTTC	T	From C to T						KKH SaCas9 NNNRRT on 20																				SpCas9-NRTH NRTH on 23
rs757557272	ABCA4	24	pathogenic		GGAGCGCTTCATCATCTTCAGCCAG<A>GACGCGGGGCAAAGACGGTGCGCTA	T	From A to T						KKH SaCas9 NNNRRT on 20							SpCas9 (From Strep. past.) NNGTGA on 22			SpCas9-NRCH comp. NRCH on 24
rs1801269	ABCA4	24	not-provided.likely-pathogenic	Stargardt disease 1 (STGD1). Cone-rod dystrophy 3 (CORD3). Age-related macular degeneration 2 (ARMD2). Stargardt disease 1 (STGD1). Retinitis pigmentosa 19 (RP19)	GACGAGGCCGACCTCCTTGGGGACC<G>CATTGCCATCATTGCCCAGGGAAGG	T	From G to T			EQR SpCas9 comp. NGAG on 23	VQR SpCas9 comp. NGAN on 23								SpCas9-NG comp. NANG on 24
rs377311148	ABCA4	24	likely-pathogenic	Stargardt disease 1 (STGD1)	GGCCGGGGCCTCATTGACCTTGCAC<T>GAGCCAGGCTGTGACAGATGTCTAT	C	From T to C										CjCas9 NNNVRYM on 19														SpCas9-NRTH comp. NGGN on 24 SpCas9-NRCH comp. NGGN on 24	xCas9 comp. NG on 24 SpCas9-NG comp. NG on 24		St3Cas9 comp. NGGNG on 24
rs865990202	ABCA4	24	pathogenic		TTCCCTATCTTCATGGTGCTGGCAT<G>GATCTACTCTGTCTCCATGACTGTG	A	From G to A										CjCas9 NNNVRYM on 19							AsCas12a RVR comp. TATV on 25									SpCas9-NRTH NRTH on 22
rs886039299	ABCA4	24	likely-pathogenic		ATATTTAACATCACTGATCGCACCC<T>CCGCCTGGTCAATCAATACCTGGAG	C	From T to C	SpCas9 comp. NGG on 23																							SpCas9-NRRH comp. NGGN on 23 SpCas9-NRTH comp. NGGN on 23 SpCas9-NRCH comp. NGGN on 23 SpCas9-NRRH comp. NGGN on 24 SpCas9-NRTH comp. NGGN on 24 SpCas9-NRCH comp. NGGN on 24	xCas9 comp. NG on 24 SpCas9-NG comp. NG on 24		St3Cas9 comp. NGGNG on 23 St3Cas9 comp. NGGNG on 24
rs61748545	ABCA4	24	likely-pathogenic	Macular dystrophy	AGGCCCCTCATGCAGAATGGTGGTC<C>AGAGACCTTTACAAAGCTGATGGGC	G	From C to G			EQR SpCas9 NGAG on 24	VQR SpCas9 NGAN on 24																					xCas9 NG on 24 SpCas9-NG NG on 24
rs61753019	ABCA4	24	pathogenic.uncertain-significance		AGTGGATGCTGTGGTTGCCATCTGC<G>TGATTTTCTCCATGTCCTTCGTCCC	A	From G to A																SpCas9-NRCH NRCH on 22
rs61750129	ABCA4	24	likely-pathogenic.benign.likely-benign	Macular degeneration. Retinitis Pigmentosa. Recessive. Cone-Rod Dystrophy. Recessive. Stargardt Disease. Recessive. Macular dystrophy	CAGAAAAGAGAAAACGTCAACCCCC<G>ACACCCCTGCTTGGGTCCCAGAGAG	A	From G to A																				enAsCas12a comp. VTTV on 23	FnCas12a comp. TTV on 24
rs781254854	ABCA4	24	uncertain-significance.likely-pathogenic		CATCCTGTGCTTCGCCTGGCAGGAC<C>GCATGACCGCTGAGCTGAAGAAGGC	T	From C to T																SpCas9-NRCH comp. NRCH on 22
rs61753033	ABCA4	24	pathogenic.not-provided	Stargardt disease (FFM). Stargardt disease 1 (STGD1). Cone-rod dystrophy 3 (CORD3)	GGAAATAAAACTGACATCTTAAGGC<T>ACATGAACTAACCAAGGTAAGGGAA	C	From T to C										CjCas9 NNNVRYM on 19 CjCas9 NNNVRYM on 22														SpCas9-NRTH comp. NGGN on 24 SpCas9-NRCH comp. NGGN on 24	xCas9 comp. NG on 24 SpCas9-NG comp. NG on 24
rs527236129	ABCA4	24	pathogenic	Stargardt disease 1 (STGD1)	TGGGTTCCTGGGGTATGCGTGAAGA<A>TCTGGTAAAGATTTTTGAGCCCTGT	T	From A to T					SaCas9 comp. NNGRRT on 21	KKH SaCas9 NNNRRT on 20 KKH SaCas9 comp. NNNRRT on 21	NmCas9 NNNNGATT on 19	St1Cas9 comp. NNRGAAW on 20		CjCas9 comp. NNNVRYM on 21					SpCas9-NRRH comp. NRRH on 23					enAsCas12a VTTV on 24	FnCas12a TTV on 25		enAsCas12a TTCN on 25 Cas12e (CasX) TTCN on 25			SpCas9-NRTH NRTH on 23 SpCas9-NRTH comp. NRTH on 24
rs756840095	ABCA4	24	likely-pathogenic	Stargardt disease 1 (STGD1)	CTCTGGGGTGGACCCTTACTCGAGA<C>GCTCAATCTGGGATCTGCTCCTGAA	T	From C to T						KKH SaCas9 NNNRRT on 20				CjCas9 comp. NNNVRYM on 19						SpCas9-NRCH comp. NRCH on 22
rs61749459	ABCA4	24	likely-pathogenic	Stargardt disease 1 (STGD1)	CCATCCTCCTAGCCTCACGGTGGCT<G>AGCACATGCTGTTCTATGCCCAGCT	A	From G to A																				enAsCas12a comp. VTTV on 23	FnCas12a comp. TTV on 24
rs62642575	ABCA4	24	pathogenic.uncertain-significance	Stargardt disease 1 (STGD1)	AACATCTCCGACTTCTTGGTAAAAA<C>GTATCCTGCTCTTATAAGAAGCAGG	T	From C to T						KKH SaCas9 NNNRRT on 20										SpCas9-NRCH comp. NRCH on 22			enAsCas12a TGTV on 25
rs61750147	ABCA4	24	likely-pathogenic.not-provided		ACACAGGTCAACCCTTCACCATCCT<G>CAGGTGCAGCACCAGGGAGAAGCTC	T	From G to T				VQR SpCas9 comp. NGAN on 23								SpCas9-NG comp. NANG on 24			SpCas9-NRRH comp. NRRH on 23			AsCas12a RR TYCV on 24		enAsCas12a VTTV on 23	FnCas12a TTV on 24		enAsCas12a TTCN on 24 Cas12e (CasX) TTCN on 24
rs1057520212	ABCA4	24	likely-pathogenic		GCCTACACTTCTCCAGAAAACCTTC<C>TGCCCTTGTGGCACTGCTCCTGCTG	G	From C to G																									xCas9 NG on 24 SpCas9-NG NG on 24
rs61751406	ABCA4	24	likely-pathogenic.not-provided	Stargardt disease 1 (STGD1). Retinal dystrophy. Stargardt disease 1 (STGD1)	GATGTCCCCAGCACAGCCTATGTGG<C>TTTATCTTGTGCTAATCTGTTCATC	A	From C to A				VQR SpCas9 NGAN on 23	SaCas9 NNGRRT on 21	KKH SaCas9 NNNRRT on 21 KKH SaCas9 comp. NNNRRT on 20	NmCas9 NNNNGATT on 20			CjCas9 comp. NNNVRYM on 20					SpCas9-NRRH NRRH on 23 SpCas9-NRRH comp. NRRH on 22			AsCas12a RR comp. TYCV on 25								SpCas9-NRTH NRTH on 24 SpCas9-NRTH comp. NRTH on 23
rs61748559	ABCA4	24	likely-pathogenic.not-provided.uncertain-significance	Stargardt disease 1 (STGD1)	CCACCCCACGTGAAGTATAAGATCC<G>AATGGACATAGACGTGGTGGAGAAA	A	From G to A											LbCas12a & AsCas12a comp. TTTV on 23										FnCas12a comp. TTV on 24
rs886044741	ABCA4	24	likely-pathogenic	Stargardt disease 1 (STGD1)	GCAACCGCTGCCTGAAGGAAGGGTG<G>CTTCCGTAAGTGCCTACGCGCCCCT	T	From G to T				VQR SpCas9 comp. NGAN on 23						CjCas9 comp. NNNVRYM on 21					SpCas9-NRRH comp. NRRH on 23	SpCas9-NRCH comp. NRCH on 24			enAsCas12a TGTV on 23							SpCas9-NRTH NRTH on 23
rs61752416	ABCA4	24	likely-pathogenic.not-provided	Stargardt disease 1 (STGD1)	ATGCCAAGGTGGTGATTCTGGACGA<A>CCCACCTCTGGGGTGGACCCTTACT	C	From A to C	SpCas9 comp. NGG on 23				SaCas9 comp. NNGRRT on 21	KKH SaCas9 comp. NNNRRT on 21				CjCas9 NNNVRYM on 20 CjCas9 comp. NNNVRYM on 21					SpCas9-NRRH comp. NRRH on 23	SpCas9-NRCH NRCH on 23								SpCas9-NRRH comp. NGGN on 23 SpCas9-NRCH comp. NGGN on 23	xCas9 comp. NG on 24 SpCas9-NG comp. NG on 24	SpCas9-NRTH comp. NRTH on 24	St3Cas9 comp. NGGNG on 21
rs886044751	ABCA4	24	likely-pathogenic	Stargardt disease 1 (STGD1)	CCAGCATCCTTCCTGTTTGATGTCC<C>CAGCACAGCCTATGTGGCTTTATCT	T	From C to T			EQR SpCas9 comp. NGAG on 23	VQR SpCas9 comp. NGAN on 23
rs777415466	ABCA4	24	likely-pathogenic	Stargardt disease 1 (STGD1)	ACGGGGGAAGCACTTGTTGGGTTTT<T>AAGCGACCTTGGCCGGATCATGAAT	C	From T to C				VQR SpCas9 comp. NGAN on 24							LbCas12a & AsCas12a TTTV on 22							AsCas12a RR TYCV on 23			FnCas12a TTV on 23		enAsCas12a TTCN on 23 Cas12e (CasX) TTCN on 23		xCas9 comp. NG on 24 SpCas9-NG comp. NG on 24
rs61750641	ABCA4	24	pathogenic.pathogenic-likely-pathogenic	Stargardt disease 1 (STGD1). Stargardt disease 1 (STGD1). Cone-rod dystrophy 3 (CORD3). Age-related macular degeneration 2 (ARMD2). Stargardt disease 1 (STGD1). Retinitis pigmentosa 19 (RP19)	GCAATTGATGAGCTGCTCACAGGAC<G>AGAACATCTTTACCTTTATGCCCGG	A	From G to A										CjCas9 NNNVRYM on 19						SpCas9-NRCH NRCH on 22			enAsCas12a comp. TGTV on 25	enAsCas12a comp. VTTV on 23	FnCas12a comp. TTV on 24
rs61749440	ABCA4	24	likely-pathogenic.not-provided.uncertain-significance.likely-benign	Retinitis Pigmentosa. Recessive. Stargardt Disease. Recessive. Macular degeneration. Cone-Rod Dystrophy. Recessive. Stargardt disease 1 (STGD1)	AGAGAAGAAAGAGCCCTGGAAAAGA<C>CGAGCCCCTAACAGAGGAAACGGAG	T	From C to T				VQR SpCas9 comp. NGAN on 23		KKH SaCas9 NNNRRT on 20																				SpCas9-NRTH NRTH on 23
rs62654397	ABCA4	24	likely-pathogenic.not-provided.uncertain-significance	Abnormal macular morphology. Peripheral neuropathy. Abnormal retinal morphology	GCGATGCCCTCAGCAGGAATGCTGC<C>GTGGCTCCAGGGGATCTTCTGCAAT	T	From C to T										CjCas9 comp. NNNVRYM on 19						SpCas9-NRCH comp. NRCH on 22			enAsCas12a TGTV on 25
rs61753020	ABCA4	24	likely-pathogenic.not-provided	Stargardt disease 1 (STGD1)	TGTGGTTGCCATCTGCGTGATTTTC<T>CCATGTCCTTCGTCCCAGCCAGCTT	C	From T to C	SpCas9 comp. NGG on 23																	AsCas12a RR TYCV on 22 AsCas12a RR TYCV on 23						SpCas9-NRRH comp. NGGN on 23 SpCas9-NRTH comp. NGGN on 23 SpCas9-NRCH comp. NGGN on 23 SpCas9-NRTH comp. NGGN on 24 SpCas9-NRCH comp. NGGN on 24	xCas9 comp. NG on 24 SpCas9-NG comp. NG on 24
rs61751393	ABCA4	24	likely-pathogenic.not-provided	Stargardt disease 1 (STGD1)	TTGGGATTCTGGTCCCAGAGCTGAT<C>CCGTGGAAGATTTCCGGTACATCTG	T	From C to T				VQR SpCas9 comp. NGAN on 23			NmCas9 NNNNGATT on 18	St1Cas9 comp. NNRGAAW on 21							SpCas9-NRRH comp. NRRH on 22			AsCas12a RR TYCV on 25		enAsCas12a VTTV on 23	FnCas12a TTV on 24		enAsCas12a TTCN on 24 Cas12e (CasX) TTCN on 24
rs61749457	ABCA4	24	pathogenic		CTCGTTGTCCCATCCTCCTAGCCTC<A>CGGTGGCTGAGCACATGCTGTTCTA	G	From A to G		VRER SpCas9 NGCG on 24 VRER SpCas9 comp. NGCG on 23																							xCas9 NG on 24 SpCas9-NG NG on 24
rs150774447	ABCA4	24	pathogenic-likely-pathogenic.not-provided.pathogenic	Stargardt disease 1 (STGD1)	CTTGTCCTCATTTTCTGTTTTAAAG<G>CCATTTCCCCAACAAGGCGATGCCC	T	From G to T				VQR SpCas9 comp. NGAN on 23		KKH SaCas9 NNNRRT on 20				CjCas9 NNNVRYM on 20					SpCas9-NRRH NRRH on 22 SpCas9-NRRH comp. NRRH on 23	SpCas9-NRCH comp. NRCH on 24		AsCas12a RR TYCV on 25								SpCas9-NRTH NRTH on 23
rs1057518767	ABCA4	24	likely-pathogenic	Visual impairment. Central scotoma. Macular degeneration. Retinal atrophy	GGCAAAGACGGTGCGCTATGCCCTG<T>GCTCCCTCTCCCAGGGCACCCTACA	A	From T to A			EQR SpCas9 NGAG on 23	VQR SpCas9 NGAN on 23											SpCas9-NRRH NRRH on 24
rs886044722	ABCA4	24	pathogenic	Stargardt disease 1 (STGD1)	ATGCCCTCAGCAGGAATGCTGCCGT<G>GCTCCAGGGGATCTTCTGCAATGTG	A	From G to A										CjCas9 NNNVRYM on 19																SpCas9-NRTH NRTH on 22
rs61750654	ABCA4	24	pathogenic.likely-pathogenic	Stargardt disease 1 (STGD1). Visual loss. Blindness. Macular degeneration. Retinal dystrophy	GGCCATCATGGTAAAGGGCGCCTTT<C>GATGTATGGGCACCATTCAGCATCT	T	From C to T											LbCas12a & AsCas12a TTTV on 23										FnCas12a TTV on 24	enAsCas12a TTTT on 22
rs61748556	ABCA4	24	likely-pathogenic.not-provided	Stargardt disease 1 (STGD1). Macular dystrophy	CAATGATGAAACTCAGCTCACCCAA<C>GTGCCCTCTCTCTACTGGAGGAAAA	T	From C to T						KKH SaCas9 NNNRRT on 20				CjCas9 comp. NNNVRYM on 19						SpCas9-NRCH comp. NRCH on 22			enAsCas12a TGTV on 25
rs752160946	ABCA4	24	likely-pathogenic		TGATTGGGAAGAACCTGTTTGCCAT<G>GTGGTGGAAGGGGTGGTGTACTTCC	C	From G to C				VQR SpCas9 comp. NGAN on 24		KKH SaCas9 comp. NNNRRT on 22				CjCas9 NNNVRYM on 19		SpCas9-NG comp. NANG on 22			SpCas9-NRRH comp. NRRH on 24										xCas9 comp. NG on 24 SpCas9-NG comp. NG on 24	SpCas9-NRTH NRTH on 22
rs568792949	ABCA4	24	likely-pathogenic		GCTGCCAGAGTGCCCCGAGGGTGCC<G>GGGGCCTCCCGCCCCCCCAGGTACC	T	From G to T												SpCas9-NG comp. NANG on 24
rs886044737	ABCA4	24	pathogenic	Stargardt disease 1 (STGD1)	GAATTTCTGACACTCCCCTGGAAGA<G>GTAAAGTAGAGATTCCAGCTGGTTT	A	From G to A															SpCas9-NRRH NRRH on 22					enAsCas12a comp. VTTV on 24	FnCas12a comp. TTV on 25		enAsCas12a comp. TTCN on 25 Cas12e (CasX) comp. TTCN on 25
rs886046564	ABCA4	24	uncertain-significance.likely-pathogenic		CCCGAGGGTGCCGGGGGCCTCCCGC<C>CCCCCAGGTACCTGACCTCCAAACA	A	From C to A					SaCas9 comp. NNGRRT on 20	KKH SaCas9 comp. NNNRRT on 20				CjCas9 NNNVRYM on 21					SpCas9-NRRH comp. NRRH on 22	SpCas9-NRCH NRCH on 24
rs61750141	ABCA4	24	likely-pathogenic.not-provided	Stargardt disease 1 (STGD1)	GACGTCCTCCTGAATAAGCCAGGCT<T>TGGCAACCGCTGCCTGAAGGAAGGG	C	From T to C			EQR SpCas9 comp. NGAG on 24	VQR SpCas9 comp. NGAN on 24																					xCas9 comp. NG on 24 SpCas9-NG comp. NG on 24
rs76157638	ABCA4	24	likely-pathogenic.pathogenic.uncertain-significance		TCTGTTTATTTGTCTCTATTTTTAG<G>AGACTATGGAACCCCACTTCCTTGG	A	From G to A				VQR SpCas9 NGAN on 23											SpCas9-NRRH NRRH on 22					enAsCas12a comp. VTTV on 23	FnCas12a comp. TTV on 24		enAsCas12a comp. TTCN on 24 Cas12e (CasX) comp. TTCN on 24
rs62646863	ABCA4	24	likely-pathogenic.not-provided.uncertain-significance	Stargardt disease 1 (STGD1). Inborn genetic diseases. Abnormal retinal morphology. Cone-rod dystrophy 3 (CORD3). Age-related macular degeneration 2 (ARMD2). Stargardt disease 1 (STGD1). Retinitis pigmentosa 19 (RP19)	AGGAAGAGGAATACGAATAAGGGAT<A>TCTTGAAAGATGAAGAAACACTGAC	G	From A to G										CjCas9 comp. NNNVRYM on 22		SpCas9-NG NANG on 22				SpCas9-NRCH comp. NRCH on 23			enAsCas12a TGTV on 24						xCas9 NG on 24 SpCas9-NG NG on 24
rs61749456	ABCA4	24	likely-pathogenic		GGCATGTGTCCACAGCACAACATCC<T>GTTCCACCAGTAAGCGACACAGGAA	G	From T to G	SpCas9 NGG on 24					KKH SaCas9 NNNRRT on 22									SpCas9-NRRH NRRH on 24			AsCas12a RR TYCV on 22						SpCas9-NRRH NGGN on 24 SpCas9-NRTH NGGN on 24 SpCas9-NRCH NGGN on 24	xCas9 NG on 24 SpCas9-NG NG on 24
rs61750146	ABCA4	24	pathogenic.likely-pathogenic	Stargardt disease 1 (STGD1). Cone-rod dystrophy 3 (CORD3). Age-related macular degeneration 2 (ARMD2). Stargardt disease 1 (STGD1). Retinitis pigmentosa 19 (RP19)	GACACAGGTCAACCCTTCACCATCC<T>GCAGGTGCAGCACCAGGGAGAAGCT	C	From T to C		VRER SpCas9 comp. NGCG on 22								CjCas9 NNNVRYM on 22								AsCas12a RR TYCV on 22						SpCas9-NRRH comp. NGGN on 24 SpCas9-NRTH comp. NGGN on 24 SpCas9-NRCH comp. NGGN on 24	xCas9 comp. NG on 24 SpCas9-NG comp. NG on 24
rs61751398	ABCA4	24	pathogenic.not-provided		AGATGCCAAGGTGGTGATTCTGGAC<G>AACCCACCTCTGGGGTGGACCCTTA	A	From G to A										CjCas9 NNNVRYM on 19	LbCas12a & AsCas12a comp. TTTV on 23					SpCas9-NRCH NRCH on 22			enAsCas12a comp. TGTV on 25		FnCas12a comp. TTV on 24
rs951379922	ABCA4	24	likely-pathogenic		CACGTACAGTGGGGGCAACAAGCGG<A>AACTCTCCACAGCCATCGCACTCAT	C	From A to C										CjCas9 NNNVRYM on 20						SpCas9-NRCH NRCH on 23 SpCas9-NRCH comp. NRCH on 24				enAsCas12a comp. VTTV on 22	FnCas12a comp. TTV on 23				xCas9 comp. NG on 24 SpCas9-NG comp. NG on 24
rs61748548	ABCA4	24	pathogenic.likely-pathogenic.not-provided.uncertain-significance	Stargardt disease 1 (STGD1)	CTCTCGGGTGCTCTCCTTCAACTGG<T>ATGAAGACAATAACTATAAGGCCTT	G	From T to G	SpCas9 NGG on 23			VQR SpCas9 NGAN on 24	SaCas9 NNGRRT on 22	KKH SaCas9 NNNRRT on 22									SpCas9-NRRH NRRH on 23 SpCas9-NRRH NRRH on 24			AsCas12a RR comp. TYCV on 24						SpCas9-NRRH NGGN on 23 SpCas9-NRCH NGGN on 23	xCas9 NG on 24 SpCas9-NG NG on 24
rs61751374	ABCA4	24	pathogenic-likely-pathogenic.pathogenic.likely-pathogenic	Stargardt disease 1 (STGD1). Cone-rod dystrophy 3 (CORD3). Stargardt disease 1 (STGD1). Cone-rod dystrophy 3 (CORD3). Retinal dystrophy. Cone-rod dystrophy 3 (CORD3). Age-related macular degeneration 2 (ARMD2). Stargardt disease 1 (STGD1). Retinitis pigmentosa 19 (RP19)	CTGAAAGGAAAGTCCCAGGAGGAGG<C>CCAGCTGGAGATGGAAGCCATGTTG	T	From C to T				VQR SpCas9 comp. NGAN on 23		KKH SaCas9 NNNRRT on 20									SpCas9-NRRH comp. NRRH on 22			AsCas12a RR TYCV on 25								SpCas9-NRTH NRTH on 23
rs886041554	ABCA4	24	pathogenic		CTGGTCTTCGTGTGGTCATTAGCAT<G>GGCTTCGTGAGACAGATACAGCTTT	T	From G to T						KKH SaCas9 comp. NNNRRT on 22									SpCas9-NRRH comp. NRRH on 24					enAsCas12a VTTV on 23	FnCas12a TTV on 24					SpCas9-NRTH NRTH on 22
rs55732384	ABCA4	24	likely-pathogenic.not-provided	Stargardt disease 1 (STGD1). Cone-rod dystrophy 3 (CORD3). Age-related macular degeneration 2 (ARMD2). Stargardt disease 1 (STGD1). Retinitis pigmentosa 19 (RP19)	TTTAAAGGCCATTTCCCCAACAAGG<C>GATGCCCTCAGCAGGAATGCTGCCG	T	From C to T						KKH SaCas9 NNNRRT on 20							SpCas9 (From Strep. past.) NNGTGA on 22
rs62646861	ABCA4	24	pathogenic.not-provided	Stargardt disease 1 (STGD1)	TTATTCATATGTAGGAAGAGGAATA<C>GAATAAGGGATATCTTGAAAGATGA	T	From C to T																	AsCas12a RVR TATV on 23
rs61750126	ABCA4	24	pathogenic.likely-pathogenic.not-provided.benign.likely-benign	Cone-rod dystrophy 3 (CORD3). Stargardt Disease. Recessive. Retinitis Pigmentosa. Recessive. Cone-Rod Dystrophy. Recessive. Macular degeneration. Stargardt disease 1 (STGD1)	GATGACCTAACTCCAGAACAAGTCC<T>GGATGGTAAGGACTGGACGGGCCAT	G	From T to G	SpCas9 NGG on 24																	AsCas12a RR TYCV on 22						SpCas9-NRRH NGGN on 24 SpCas9-NRTH NGGN on 24 SpCas9-NRCH NGGN on 24	xCas9 NG on 24 SpCas9-NG NG on 24
rs61752419	ABCA4	24	pathogenic.not-provided	Retinal dystrophy	ACCCTTACTCGAGACGCTCAATCTG<G>GATCTGCTCCTGAAGTATCGCTCAG	A	From G to A			EQR SpCas9 NGAG on 23	VQR SpCas9 NGAN on 23
rs61750646	ABCA4	24	pathogenic.uncertain-significance		CAACCTTCTCTCCACCCCCCAGGAT<G>AGCCCACCACAGGGATGGACCCCCA	A	From G to A										CjCas9 NNNVRYM on 19							AsCas12a RVR comp. TATV on 25			enAsCas12a comp. VTTV on 23	FnCas12a comp. TTV on 24					SpCas9-NRTH NRTH on 22
rs762150575	ABCA4	24	likely-pathogenic		TCCTGAATAAGCCAGGCTTTGGCAA<C>CGCTGCCTGAAGGAAGGGTGGCTTC	A	From C to A											LbCas12a & AsCas12a comp. TTTV on 25	SpCas9-NG NANG on 24			SpCas9-NRRH NRRH on 23											SpCas9-NRTH comp. NRTH on 23
rs886044731	ABCA4	24	pathogenic	Stargardt disease 1 (STGD1)	CACCTCTGGGGTGGACCCTTACTCG<A>GACGCTCAATCTGGGATCTGCTCCT	T	From A to T												SpCas9-NG comp. NANG on 24	SpCas9 (From Strep. past.) NNGTGA on 22
rs61749441	ABCA4	24	pathogenic.not-provided		AGAAGAAAGAGCCCTGGAAAAGACC<G>AGCCCCTAACAGAGGAAACGGAGGA	A	From G to A																				enAsCas12a comp. VTTV on 23	FnCas12a comp. TTV on 24
rs1064793006	ABCA4	24	likely-pathogenic		AGCTGATCCCGTGGAAGATTTCCGG<T>ACATCTGGGGCGGGTTTGCCTATCT	C	From T to C										CjCas9 NNNVRYM on 22						SpCas9-NRCH NRCH on 23									xCas9 comp. NG on 24 SpCas9-NG comp. NG on 24
rs61750145	ABCA4	24	pathogenic.likely-pathogenic	Stargardt disease 1 (STGD1)	AAATGGACACAGGTCAACCCTTCAC<C>ATCCTGCAGGTGCAGCACCAGGGAG	T	From C to T										CjCas9 comp. NNNVRYM on 19							AsCas12a RVR TATV on 25									SpCas9-NRTH comp. NRTH on 22
rs58331765	ABCA4	24	likely-pathogenic.not-provided.likely-benign		TCCAGGGTGGGTTCCTGGGGTATGC<G>TGAAGAATCTGGTAAAGATTTTTGA	T	From G to T															SpCas9-NRRH comp. NRRH on 24	SpCas9-NRCH NRCH on 22				enAsCas12a VTTV on 24	FnCas12a TTV on 25
rs61750142	ABCA4	24	likely-pathogenic.not-provided	Stargardt disease 1 (STGD1)	CTGAATAAGCCAGGCTTTGGCAACC<G>CTGCCTGAAGGAAGGGTGGCTTCCG	A	From G to A						KKH SaCas9 comp. NNNRRT on 20
rs61749420	ABCA4	24	likely-pathogenic	Stargardt disease 1 (STGD1). Cone-rod dystrophy 3 (CORD3). Age-related macular degeneration 2 (ARMD2). Stargardt disease 1 (STGD1). Retinitis pigmentosa 19 (RP19)	CTTTAGTTTCATGATCATCCTGAAC<C>GCTGTTTCCCTATCTTCATGGTGCT	T	From C to T										CjCas9 comp. NNNVRYM on 19						SpCas9-NRCH comp. NRCH on 22
rs61749455_0	ABCA4	24	likely-pathogenic.not-provided.uncertain-significance	Macular dystrophy	AACCTCTGGGACTGTGCTCGTTGGG<G>GAAGGGACATTGAAACCAGCCTGGA	C	From G to C		VRER SpCas9 NGCG on 23								CjCas9 comp. NNNVRYM on 21					SpCas9-NRRH NRRH on 22	SpCas9-NRCH comp. NRCH on 24									xCas9 comp. NG on 24 SpCas9-NG comp. NG on 24
rs61749455_1	ABCA4	24	likely-pathogenic.not-provided.uncertain-significance		AACCTCTGGGACTGTGCTCGTTGGG<G>GAAGGGACATTGAAACCAGCCTGGA	T	From G to T					SaCas9 NNGRRT on 20	KKH SaCas9 NNNRRT on 20				CjCas9 comp. NNNVRYM on 21			SpCas9 (From Strep. past.) NNGTGA on 22		SpCas9-NRRH NRRH on 22	SpCas9-NRCH comp. NRCH on 24
rs886044732	ABCA4	24	pathogenic	Stargardt disease 1 (STGD1)	AAGCACCTCCAGTTTATCAGTGGAG<T>GAGCCCCACCACCTACTGGGTGACC	G	From T to G	SpCas9 NGG on 23 SpCas9 NGG on 24											SpCas9-NG NANG on 22			SpCas9-NRRH NRRH on 24			AsCas12a RR comp. TYCV on 23						SpCas9-NRRH NGGN on 23 SpCas9-NRTH NGGN on 23 SpCas9-NRCH NGGN on 23 SpCas9-NRRH NGGN on 24 SpCas9-NRTH NGGN on 24 SpCas9-NRCH NGGN on 24	xCas9 NG on 24 SpCas9-NG NG on 24		St3Cas9 NGGNG on 24
rs61752417	ABCA4	24	likely-pathogenic.not-provided	Stargardt disease 1 (STGD1)	GTGATTCTGGACGAACCCACCTCTG<G>GGTGGACCCTTACTCGAGACGCTCA	A	From G to A			EQR SpCas9 NGAG on 23	VQR SpCas9 NGAN on 23
rs1064793012	ABCA4	24	likely-pathogenic		CCGCAGCTCAACACGGGGACACAGC<T>GGTCCTCCAGCATGTGCAGGCGCTG	C	From T to C										CjCas9 NNNVRYM on 19														SpCas9-NRTH comp. NGGN on 24 SpCas9-NRCH comp. NGGN on 24	xCas9 comp. NG on 24 SpCas9-NG comp. NG on 24
rs61753045	ABCA4	24	pathogenic.not-provided	Stargardt disease 1 (STGD1)	GCAGTGTGCAGAGGGAGAGGCACTA<C>AACATGCTCCAGTTCCAGGTCTCCT	A	From C to A									TdCas9 NAAAAC on 23		LbCas12a & AsCas12a comp. TTTV on 24				SpCas9-NRRH NRRH on 23 SpCas9-NRRH NRRH on 24						FnCas12a comp. TTV on 25	enAsCas12a comp. TTTT on 23
rs61751399	ABCA4	24	pathogenic-likely-pathogenic.likely-pathogenic.not-provided	Stargardt disease 1 (STGD1). Retinitis pigmentosa (RP)	CATCATGTCCACTCACCACATGGAC<G>AGGCCGACCTCCTTGGGGACCGCAT	A	From G to A										CjCas9 NNNVRYM on 19						SpCas9-NRCH NRCH on 22			enAsCas12a comp. TGTV on 25	enAsCas12a comp. VTTV on 23	FnCas12a comp. TTV on 24
rs886044742	ABCA4	24	pathogenic	Stargardt disease 1 (STGD1)	GAATATTTTCTTGTCTTCCATGAGG<G>AGTACCCCTGTGGCAACTCAACACC	T	From G to T						KKH SaCas9 NNNRRT on 20				CjCas9 NNNVRYM on 20					SpCas9-NRRH NRRH on 22	SpCas9-NRCH comp. NRCH on 24										SpCas9-NRTH NRTH on 23
rs779466403	ABCA4	24	likely-pathogenic		CTGTCCATGCAGATGATGCTCCTTG<A>TGCTGCTGTCTATGGCTTACTCGCT	T	From A to T										CjCas9 comp. NNNVRYM on 21					SpCas9-NRRH comp. NRRH on 23	SpCas9-NRCH comp. NRCH on 24				enAsCas12a VTTV on 24	FnCas12a TTV on 25					SpCas9-NRTH NRTH on 23
rs1057517700	ABCA4	24	pathogenic		CATCTGGGGCGGGTTTGCCTATCTG<C>AGGACATGGTTGAACAGGGGATCAC	T	From C to T																			enAsCas12a TGTV on 23							SpCas9-NRTH NRTH on 23
rs886044758	ABCA4	24	likely-pathogenic	Stargardt disease 1 (STGD1). Cone-rod dystrophy 3 (CORD3). Age-related macular degeneration 2 (ARMD2). Stargardt disease 1 (STGD1). Retinitis pigmentosa 19 (RP19)	CCTCAGTTTGATGCAATTGATGAGC<T>GCTCACAGGACGAGAACATCTTTAC	C	From T to C		VRER SpCas9 comp. NGCG on 22								CjCas9 NNNVRYM on 19														SpCas9-NRTH comp. NGGN on 24 SpCas9-NRCH comp. NGGN on 24	xCas9 comp. NG on 24 SpCas9-NG comp. NG on 24
rs1128501	ABCB1	5243	pathogenic	Colchicine resistance	AGTGATGTCTCCAAGATTAATGAAG<G>AATTGGTGACAAAATTGGAATGTTC	T	From G to T						KKH SaCas9 NNNRRT on 20				CjCas9 NNNVRYM on 20					SpCas9-NRRH NRRH on 22	SpCas9-NRCH comp. NRCH on 24										SpCas9-NRTH NRTH on 23
rs11568372	ABCB11	8647	pathogenic	Progressive familial intrahepatic cholestasis 2 (PFIC2). Benign recurrent intrahepatic cholestasis 2 (BRIC2). Familial Intrahepatic Cholestasis (PFIC1)	AGAACAGTGGCTGCTTTTGGTGGTG<A>GAAAAGAGAGGTTGAAAGGTTGGTT	G	From A to G	SpCas9 NGG on 23																	AsCas12a RR comp. TYCV on 22 AsCas12a RR comp. TYCV on 23						SpCas9-NRRH NGGN on 23 SpCas9-NRTH NGGN on 23 SpCas9-NRCH NGGN on 23 SpCas9-NRTH NGGN on 24 SpCas9-NRCH NGGN on 24	xCas9 NG on 24 SpCas9-NG NG on 24
rs188824058	ABCB11	8647	likely-pathogenic	Benign recurrent intrahepatic cholestasis 2 (BRIC2). Progressive familial intrahepatic cholestasis 2 (PFIC2). Benign recurrent intrahepatic cholestasis 2 (BRIC2). Progressive familial intrahepatic cholestasis 2 (PFIC2)	GTGACCGTGGATGGCCATGACATTC<G>CTCTCTTAACATTCAGTGGCTTAGA	A	From G to A					SaCas9 comp. NNGRRT on 20	KKH SaCas9 comp. NNNRRT on 20							SpCas9 (From Strep. past.) comp. NNGTGA on 22
rs756529333	ABCB11	8647	pathogenic		CAGGATGTTGACAGGATTTGCCTCT<C>GAGATAAGCAGGCCCTGGAGATGGT	T	From C to T																				enAsCas12a VTTV on 23	FnCas12a TTV on 24
rs752992432	ABCB11	8647	likely-pathogenic		CCTCTTTTGAAGGTTGCTGAACATC<G>AGAGCGAAATGATCAAATTTGCCAG	C	From G to C	SpCas9 comp. NGG on 24				SaCas9 comp. NNGRRT on 23										SpCas9-NRRH comp. NRRH on 24			AsCas12a RR TYCV on 23						SpCas9-NRRH comp. NGGN on 24 SpCas9-NRTH comp. NGGN on 24 SpCas9-NRCH comp. NGGN on 24	xCas9 comp. NG on 24 SpCas9-NG comp. NG on 24
rs763782349	ABCB11	8647	pathogenic	Benign recurrent intrahepatic cholestasis 2 (BRIC2)	AGGGTCTGTGGGTGCAGCTGTGAAC<G>GGACAGTCACACCCTTGTATGCCTT	A	From G to A										CjCas9 NNNVRYM on 19						SpCas9-NRCH NRCH on 22
rs72549396	ABCB11	8647	pathogenic		TGATTGTAAATTTACATATCCTTCT<C>GACCTGACTCGCAAGTTCTGAATGG	T	From C to T																				enAsCas12a VTTV on 23	FnCas12a TTV on 24
rs774824767	ABCB11	8647	pathogenic	Benign recurrent intrahepatic cholestasis 2 (BRIC2)	AAGTACAGCACTGCAACTCATTCAG<C>GATTCTATGACCCCTGTGAAGGAAT	T	From C to T						KKH SaCas9 NNNRRT on 20							SpCas9 (From Strep. past.) NNGTGA on 22
rs1060499579_0	ABCB11	8647	pathogenic		TCCTGATAAAGAGGAACAAAGGTCA<C>AGATCAATGGTGTGTGCCTACTTTT	A	From C to A											LbCas12a & AsCas12a comp. TTTV on 24	SpCas9-NG NANG on 24			SpCas9-NRRH NRRH on 23						FnCas12a comp. TTV on 25
rs1060499579_1	ABCB11	8647	pathogenic	Benign recurrent intrahepatic cholestasis 2 (BRIC2). Progressive familial intrahepatic cholestasis 2 (PFIC2)	TCCTGATAAAGAGGAACAAAGGTCA<C>AGATCAATGGTGTGTGCCTACTTTT	T	From C to T																	AsCas12a RVR comp. TATV on 24									SpCas9-NRTH NRTH on 23
rs1026511416	ABCB11	8647	likely-pathogenic		TTGAAGGTTGCTGAACATCGAGAGC<G>AAATGATCAAATTTGCCAGTTACTA	T	From G to T															SpCas9-NRRH comp. NRRH on 24	SpCas9-NRCH NRCH on 22
rs772294884	ABCB11	8647	likely-pathogenic		TGGGGAGCTCCTAACAAAAAGGCTA<C>GTAAATTTGGTTTCAGGGCAATGCT	T	From C to T																SpCas9-NRCH comp. NRCH on 22	AsCas12a RVR TATV on 23		enAsCas12a TGTV on 25
rs72549398	ABCB11	8647	pathogenic	Pruritus. Intrahepatic cholestasis. Abnormal liver function tests during pregnancy	TGCAAAAGCTAAAATATCAGCTGCA<C>GCTTTTTTCAACTGCTGGACCGACA	T	From C to T										CjCas9 comp. NNNVRYM on 19						SpCas9-NRCH comp. NRCH on 22
rs886043935	ABCB11	8647	pathogenic		CCTGGATGAAGGAGAATATACACCA<G>GAACCCTTGTCCAGGTACCTTGGAC	A	From G to A																				enAsCas12a comp. VTTV on 24	FnCas12a comp. TTV on 25
rs72549402	ABCB11	8647	pathogenic	Benign recurrent intrahepatic cholestasis 2 (BRIC2)	GCCCATGCTCTCTAGGTGACCGTGG<A>TGGCCATGACATTCGCTCTCTTAAC	G	From A to G	SpCas9 NGG on 23															SpCas9-NRCH comp. NRCH on 23								SpCas9-NRTH NGGN on 23 SpCas9-NRCH NGGN on 23	xCas9 NG on 24 SpCas9-NG NG on 24		St3Cas9 NGGNG on 23
rs121908935	ABCB11	8647	pathogenic	Benign recurrent intrahepatic cholestasis 2 (BRIC2)	AATGTGACCTTCCATTATCCTTCCA<G>ACCAGAGGTGAAGGTGAGTGCTGGT	C	From G to C										CjCas9 NNNVRYM on 20						SpCas9-NRCH NRCH on 23			enAsCas12a comp. TGTV on 24						xCas9 comp. NG on 24 SpCas9-NG comp. NG on 24		St3Cas9 comp. NGGNG on 21
rs886043986	ABCB11	8647	pathogenic	Progressive familial intrahepatic cholestasis 2 (PFIC2)	TACCATGTCTGACTCAGTAATTCTT<C>GAAGTATAAAGAAATTTGGAGAGGA	T	From C to T											LbCas12a & AsCas12a TTTV on 23										FnCas12a TTV on 24
rs863225299	ABCB4	5244	likely-pathogenic	Progressive familial intrahepatic cholestasis 3 (PFIC3)	TCATTTTGGACTTTGGCAGCTGGTC<G>ACAGATCAGGAAAATTAGGCAGAAG	A	From G to A																				enAsCas12a comp. VTTV on 23	FnCas12a comp. TTV on 24
rs886042562	ABCB4	5244	pathogenic		CTATGGAATTACTTTTAGTATCTCA<C>AAGCATTTATGTATTTTTCCTATGC	T	From C to T																	AsCas12a RVR comp. TATV on 24									SpCas9-NRTH NRTH on 23
rs61730509	ABCB4	5244	benign.likely-pathogenic		GCTTTTCAGGAATTCTGTGCAGAAG<G>CACACATCTATGGAATTACTTTTAG	A	From G to A				VQR SpCas9 NGAN on 23											SpCas9-NRRH NRRH on 22				enAsCas12a comp. TGTV on 23							SpCas9-NRTH comp. NRTH on 23
rs376926391_0	ABCB4	5244	pathogenic		TTATTTTATTTCCTTTTTTTAGTTT<C>GATACTCCGATTGGCAGGATAAATT	A	From C to A															SpCas9-NRRH NRRH on 24
rs376926391_1	ABCB4	5244	pathogenic		TTATTTTATTTCCTTTTTTTAGTTT<C>GATACTCCGATTGGCAGGATAAATT	T	From C to T									TdCas9 comp. NAAAAC on 24		LbCas12a & AsCas12a TTTV on 23										FnCas12a TTV on 24	enAsCas12a TTTT on 22
rs72552778	ABCB4	5244	conflicting-interpretations-of-pathogenicity.pathogenic.likely-pathogenic	Cholecystitis (GBD1). Cholestasis. intrahepatic. of pregnancy 3 (ICP3). Progressive familial intrahepatic cholestasis 3 (PFIC3). ABCB4-Related Intrahepatic Cholestasis	TATGCACTGGCCTTCTGGTATGGAT<C>CACTCTAGTCATATCAAAAGAATAT	T	From C to T				VQR SpCas9 comp. NGAN on 23			NmCas9 NNNNGATT on 18						SpCas9 (From Strep. past.) comp. NNGTGA on 20							enAsCas12a VTTV on 23	FnCas12a TTV on 24		enAsCas12a TTCN on 24 Cas12e (CasX) TTCN on 24
rs121918441	ABCB4	5244	pathogenic	Cholestasis. intrahepatic. of pregnancy 3 (ICP3)	AAGCAGAGGATCGCCATTGCACGTG<C>CCTGGTTCGCAACCCCAAGATCCTT	A	From C to A				VQR SpCas9 NGAN on 23		KKH SaCas9 comp. NNNRRT on 20				CjCas9 NNNVRYM on 21 CjCas9 comp. NNNVRYM on 20			SpCas9 (From Strep. past.) NNGTGA on 20		SpCas9-NRRH NRRH on 23 SpCas9-NRRH comp. NRRH on 22	SpCas9-NRCH NRCH on 24										SpCas9-NRTH comp. NRTH on 23
rs752916287_0	ABCB4	5244	uncertain-significance.likely-pathogenic.pathogenic		TATCTCATTGTGAATGGACATATGC<G>CTTCAGAGATGTTATTCTGTAAGTA	C	From G to C	SpCas9 comp. NGG on 23 SpCas9 comp. NGG on 24											SpCas9-NG comp. NANG on 22			SpCas9-NRRH comp. NRRH on 24	SpCas9-NRCH NRCH on 22								SpCas9-NRRH comp. NGGN on 23 SpCas9-NRTH comp. NGGN on 23 SpCas9-NRCH comp. NGGN on 23 SpCas9-NRRH comp. NGGN on 24 SpCas9-NRTH comp. NGGN on 24 SpCas9-NRCH comp. NGGN on 24	xCas9 comp. NG on 24 SpCas9-NG comp. NG on 24
rs752916287_1	ABCB4	5244	uncertain-significance.likely-pathogenic.pathogenic	Progressive familial intrahepatic cholestasis 3 (PFIC3)	TATCTCATTGTGAATGGACATATGC<G>CTTCAGAGATGTTATTCTGTAAGTA	A	From G to A						KKH SaCas9 comp. NNNRRT on 20										SpCas9-NRCH NRCH on 22
rs121918443	ABCB4	5244	pathogenic	Progressive familial intrahepatic cholestasis 3 (PFIC3)	GGAGTTCAATGATGTTCACTTTTCT<T>ACCCTTCTCGAGCTAACGTCAAGGT	C	From T to C			EQR SpCas9 comp. NGAG on 24	VQR SpCas9 comp. NGAN on 24						CjCas9 NNNVRYM on 22			SpCas9 (From Strep. past.) comp. NNGTGA on 21												xCas9 comp. NG on 24 SpCas9-NG comp. NG on 24		St3Cas9 comp. NGGNG on 21
rs121918442	ABCB4	5244	uncertain-significance.pathogenic	Cholecystitis (GBD1)	CATACATCCTTTCATCGAGACGTTA<C>CCCACGTAAGTTAAAGAGTAGCTGA	T	From C to T				VQR SpCas9 comp. NGAN on 23											SpCas9-NRRH comp. NRRH on 22		AsCas12a RVR TATV on 23	AsCas12a RR TYCV on 25								SpCas9-NRTH NRTH on 23
rs58238559	ABCB4	5244	likely-benign.benign.pathogenic	Cholecystitis (GBD1)	CATCAACGACACCACTGAACTCAAT<A>CGCGGCTAACAGAGTAGGTACATTG	G	From A to G		VRER SpCas9 NGCG on 24										SpCas9-NG NANG on 22				SpCas9-NRCH comp. NRCH on 23									xCas9 NG on 24 SpCas9-NG NG on 24
rs863225298	ABCB4	5244	likely-pathogenic	Progressive familial intrahepatic cholestasis 3 (PFIC3)	GTTCAATGATGTTCACTTTTCTTAC<C>CTTCTCGAGCTAACGTCAAGGTACT	G	From C to G		VRER SpCas9 comp. NGCG on 23										SpCas9-NG NANG on 22			SpCas9-NRRH comp. NRRH on 22	SpCas9-NRCH NRCH on 24									xCas9 NG on 24 SpCas9-NG NG on 24
rs397514620	ABCB4	5244	pathogenic		GCAGAAGCAGAGGATCGCCATTGCA<C>GTGCCCTGGTTCGCAACCCCAAGAT	T	From C to T										CjCas9 comp. NNNVRYM on 19						SpCas9-NRCH comp. NRCH on 22			enAsCas12a TGTV on 25
rs886043725	ABCB4	5244	pathogenic		TGCTGTGTCAGGAATTGTTGAAATG<A>AATTGTTGGCTGGAAATGCCAAAAG	T	From A to T																SpCas9-NRCH comp. NRCH on 24			enAsCas12a TGTV on 23	enAsCas12a comp. VTTV on 22	FnCas12a comp. TTV on 23					SpCas9-NRTH NRTH on 23
rs72552780_0	ABCB4	5244	pathogenic		TTCATTTTGGACTTTGGCAGCTGGT<C>GACAGATCAGGAAAATTAGGCAGAA	G	From C to G	SpCas9 NGG on 24														SpCas9-NRRH NRRH on 24			AsCas12a RR comp. TYCV on 23						SpCas9-NRRH NGGN on 24 SpCas9-NRTH NGGN on 24 SpCas9-NRCH NGGN on 24	xCas9 NG on 24 SpCas9-NG NG on 24		St3Cas9 NGGNG on 21
rs72552780_1	ABCB4	5244	pathogenic	Cholestasis. intrahepatic. of pregnancy 3 (ICP3)	TTCATTTTGGACTTTGGCAGCTGGT<C>GACAGATCAGGAAAATTAGGCAGAA	T	From C to T																				enAsCas12a VTTV on 23	FnCas12a TTV on 24
rs748842753	ABCB4	5244	pathogenic		ATCCTCCTGTTGGATGAAGCTACAT<C>AGCTCTGGATACTGAAAGTGAAAAG	T	From C to T																				enAsCas12a VTTV on 23	FnCas12a TTV on 24
rs397514758	ABCB6	10058	pathogenic	Dyschromatosis universalis hereditaria 3 (DUH3)	CCCTTCCAGGTGAAGGACCTTCCTG<G>AGCAGGGCCCCTTCGCTTTCAGAAG	A	From G to A				VQR SpCas9 NGAN on 23																enAsCas12a comp. VTTV on 23	FnCas12a comp. TTV on 24		enAsCas12a comp. TTCN on 24 Cas12e (CasX) comp. TTCN on 24
rs148211042	ABCB6	10058	pathogenic	Pseudohyperkalemia. familial. 2. due to red cell leak (PSHK2)	GGGTACAGGACACAGGTGGGCGAGC<G>GGGACTGAAGCTGAGCGGCGGGGAG	A	From G to A										CjCas9 NNNVRYM on 19						SpCas9-NRCH NRCH on 22
rs387906910	ABCB6	10058	pathogenic	Microphthalmia. isolated. with coloboma 7 (MCOPCB7)	TTCTCCTCACCCCAGACACGAGGCT<C>TGTTGTCCCGAGGTGGGGTGTATGC	G	From C to G										CjCas9 comp. NNNVRYM on 20						SpCas9-NRCH comp. NRCH on 23			enAsCas12a TGTV on 24						xCas9 NG on 24 SpCas9-NG NG on 24
rs397514757	ABCB6	10058	pathogenic	Dyschromatosis universalis hereditaria 3 (DUH3)	GAACTTGGCCCTGGTGTCTTGGAAC<A>GCCCACAGTGGTGGTGGGCAAGGGC	G	From A to G										CjCas9 comp. NNNVRYM on 19		SpCas9-NG NANG on 22												SpCas9-NRTH NGGN on 24 SpCas9-NRCH NGGN on 24	xCas9 NG on 24 SpCas9-NG NG on 24
rs764893806	ABCB6	10058	pathogenic	Pseudohyperkalemia. familial. 2. due to red cell leak (PSHK2)	AGGGGAGGTGCTGCGGATCGCGGAT<C>GGGGCACATCCAGTGTCACAGGGCT	T	From C to T							NmCas9 NNNNGATT on 18													enAsCas12a VTTV on 23	FnCas12a TTV on 24
rs397514756	ABCB6	10058	pathogenic	Dyschromatosis universalis hereditaria 3 (DUH3)	CTCATCTTCTCCCACCTGCACGAGC<T>CTCACTGCGCTGGCACCTGGGGCGC	C	From T to C	SpCas9 comp. NGG on 23									CjCas9 NNNVRYM on 19		SpCas9-NG comp. NANG on 22												SpCas9-NRRH comp. NGGN on 23 SpCas9-NRTH comp. NGGN on 23 SpCas9-NRCH comp. NGGN on 23 SpCas9-NRTH comp. NGGN on 24 SpCas9-NRCH comp. NGGN on 24	xCas9 comp. NG on 24 SpCas9-NG comp. NG on 24
rs387906911	ABCB6	10058	pathogenic	Microphthalmia. isolated. with coloboma 7 (MCOPCB7)	TCCCTGCAGACGCCGGGAGCGGCCC<G>CTGGTGCTGATTCGCTGTCTTGGGG	A	From G to A						KKH SaCas9 comp. NNNRRT on 20
rs80356713	ABCB7	22	pathogenic	Anemia sideroblastic and spinocerebellar ataxia (ASAT)	AGGTACCCTTACTGTTGGAGATCTA<G>TAATGGTGAATGGACTGCTTTTTCA	C	From G to C						KKH SaCas9 comp. NNNRRT on 21				CjCas9 comp. NNNVRYM on 21					SpCas9-NRRH comp. NRRH on 23	SpCas9-NRCH NRCH on 23									xCas9 comp. NG on 24 SpCas9-NG comp. NG on 24	SpCas9-NRTH comp. NRTH on 24
rs80356714	ABCB7	22	pathogenic	Anemia sideroblastic and spinocerebellar ataxia (ASAT)	GAACTTTCTGGGAACTGTATATAGA<G>AGACTAGACAAGCACTCATAGATAT	A	From G to A								St1Cas9 NNRGAAW on 20			LbCas12a & AsCas12a comp. TTTV on 24				SpCas9-NRRH NRRH on 22						FnCas12a comp. TTV on 25		enAsCas12a comp. TTCN on 25 Cas12e (CasX) comp. TTCN on 25
rs1057518042	ABCB7	22	likely-pathogenic	Anemia sideroblastic and spinocerebellar ataxia (ASAT)	ACCCTTACTGTTGGAGATCTAGTAA<T>GGTGAATGGACTGCTTTTTCAGCTT	C	From T to C																									xCas9 comp. NG on 24 SpCas9-NG comp. NG on 24
rs797044558	ABCB7	22	pathogenic.uncertain-significance	Spinocerebellar ataxia. X-linked. Inborn genetic diseases	TGTTTCTCATGTGTTTACTTTTTAG<G>GTAAGGTAGCCGAACGTGGTACCCA	A	From G to A			EQR SpCas9 NGAG on 23	VQR SpCas9 NGAN on 23											SpCas9-NRRH NRRH on 22
rs515726147	ABCB7	22	pathogenic	Anemia sideroblastic and spinocerebellar ataxia (ASAT)	GAGCTGGAGCTGCTTTTTTTAACGA<A>GTTCGAAATGCAGTATTTGGCAAGG	T	From A to T						KKH SaCas9 NNNRRT on 20				CjCas9 comp. NNNVRYM on 19 CjCas9 comp. NNNVRYM on 21																SpCas9-NRTH comp. NRTH on 24
rs72554634	ABCB7	22	pathogenic		TAATGGTGCTCGCCAGTCAGGGAAT<T>GTGGCAGGTAATGAGTCTGTGGCTA	A	From T to A						KKH SaCas9 NNNRRT on 22				CjCas9 NNNVRYM on 19					SpCas9-NRRH NRRH on 24
rs1133577	ABCB7	22	likely-pathogenic		CTTCCTTTTCTAGTATTACAAATGC<G>GTGCCCAGTTTGCTTTGGTAACCCT	A	From G to A																SpCas9-NRCH NRCH on 22
rs786205465	ABCC2	1244	likely-pathogenic.uncertain-significance	Dubin-Johnson syndrome (DJS)	AATATGAATTATTTTCTTCTTCAGG<G>TATAAATCTTAGTGGGGGTCAGAAG	T	From G to T						KKH SaCas9 NNNRRT on 20				CjCas9 comp. NNNVRYM on 21					SpCas9-NRRH NRRH on 22 SpCas9-NRRH comp. NRRH on 23	SpCas9-NRCH comp. NRCH on 24				enAsCas12a VTTV on 24	FnCas12a TTV on 25					SpCas9-NRTH NRTH on 23
rs371866713	ABCC2	1244	pathogenic		ACTTTCTACATGGTGCTCCTGAAAT<C>ATTCCTACTGAAGCTAGTGAATGAC	G	From C to G				VQR SpCas9 NGAN on 24		KKH SaCas9 NNNRRT on 22	NmCas9 NNNNGATT on 21			CjCas9 comp. NNNVRYM on 19		SpCas9-NG NANG on 22			SpCas9-NRRH NRRH on 24										xCas9 NG on 24 SpCas9-NG NG on 24	SpCas9-NRTH comp. NRTH on 22
rs72558202	ABCC2	1244	pathogenic	Dubin-Johnson syndrome (DJS)	CGAGAGAAGCTGACCATCATCCCCC<A>GGTGAGCTCTAGAACTTACTCGGGC	G	From A to G					SaCas9 NNGRRT on 23																			SpCas9-NRRH NGGN on 24 SpCas9-NRTH NGGN on 24 SpCas9-NRCH NGGN on 24	xCas9 NG on 24 SpCas9-NG NG on 24
rs56199535_0	ABCC2	1244	pathogenic		AAATCTTAGTGGGGGTCAGAAGCAG<C>GGATCAGCCTGGCCAGAGCTACCTA	A	From C to A			EQR SpCas9 NGAG on 23	VQR SpCas9 NGAN on 23								SpCas9-NG NANG on 24
rs56199535_1	ABCC2	1244	pathogenic	Dubin-Johnson syndrome (DJS)	AAATCTTAGTGGGGGTCAGAAGCAG<C>GGATCAGCCTGGCCAGAGCTACCTA	T	From C to T						KKH SaCas9 NNNRRT on 20
rs72558201	ABCC2	1244	pathogenic	Dubin-Johnson syndrome (DJS)	CGAGACCGTATCAGGTTTGCCAGTT<A>TCCGTGCCTTTGAGCACCAGCAGCG	T	From A to T								St1Cas9 comp. NNRGAAW on 20	TdCas9 comp. NAAAAC on 23		LbCas12a & AsCas12a TTTV on 24				SpCas9-NRRH comp. NRRH on 23 SpCas9-NRRH comp. NRRH on 24			AsCas12a RR TYCV on 25			FnCas12a TTV on 25	enAsCas12a TTTT on 23	enAsCas12a TTCN on 25 Cas12e (CasX) TTCN on 25
rs17222547	ABCC2	1244	pathogenic		CTTTGCAGGTGAAGTTCTCCATCTA<C>CTGGAGTACCTACAAGCAATAGGAT	A	From C to A						KKH SaCas9 comp. NNNRRT on 20									SpCas9-NRRH NRRH on 23 SpCas9-NRRH comp. NRRH on 22	SpCas9-NRCH NRCH on 24				enAsCas12a comp. VTTV on 24	FnCas12a comp. TTV on 25					SpCas9-NRTH comp. NRTH on 23
rs577353173	ABCC2	1244	pathogenic		ACCAACCAGAAATGTGTCTTTTCCT<G>GATCACCTCCAACAGGTGAGGCTTC	T	From G to T												SpCas9-NG comp. NANG on 24								enAsCas12a VTTV on 23	FnCas12a TTV on 24
rs72558200	ABCC2	1244	pathogenic	Dubin-Johnson syndrome (DJS)	GTGTCTACCTCCCGCCAGCTGAGGC<G>TCTGGACTCTGTCACCAGGTCCCCA	A	From G to A						KKH SaCas9 comp. NNNRRT on 20				CjCas9 NNNVRYM on 19						SpCas9-NRCH NRCH on 22
rs764958537	ABCC2	1244	pathogenic		CACTGCCTATGTCCCACAGCAGTCC<T>GGATTCAGAATGGCACCATAAAGGA	C	From T to C																		AsCas12a RR TYCV on 22						SpCas9-NRRH comp. NGGN on 24 SpCas9-NRTH comp. NGGN on 24 SpCas9-NRCH comp. NGGN on 24	xCas9 comp. NG on 24 SpCas9-NG comp. NG on 24
rs63750235	ABCC6	368	pathogenic	Pseudoxanthoma elasticum (PXE)	TCGACGGGGTCCCCATTGCCCACGT<G>GGGCTGCACACACTGCGCTCCAGGA	A	From G to A										CjCas9 NNNVRYM on 19																SpCas9-NRTH NRTH on 22
rs1002088882	ABCC6	368	pathogenic	Pseudoxanthoma elasticum (PXE)	AATTCCTCATTCATCCTACTGTGTG<G>CTCACCACGATGGTAATGATGCCTT	A	From G to A				VQR SpCas9 NGAN on 23	SaCas9 comp. NNGRRT on 20	KKH SaCas9 comp. NNNRRT on 20							SpCas9 (From Strep. past.) NNGTGA on 20													SpCas9-NRTH comp. NRTH on 23
rs72650702	ABCC6	368	pathogenic	Pseudoxanthoma elasticum (PXE)	GGGCCATCGCAGAGATGGGTTCCTA<C>CAGGAGCTTCTGCAGAGGAAGGGGG	A	From C to A										CjCas9 NNNVRYM on 21					SpCas9-NRRH NRRH on 23	SpCas9-NRCH NRCH on 24				enAsCas12a comp. VTTV on 24	FnCas12a comp. TTV on 25					SpCas9-NRTH comp. NRTH on 23
rs72653756	ABCC6	368	pathogenic.uncertain-significance	Pseudoxanthoma elasticum (PXE)	TGGGAGAGAAAACTCCTCAGAAGAA<C>TTGTTTCCCGGCTTGAAAAGGAGTG	T	From C to T					SaCas9 NNGRRT on 20	KKH SaCas9 NNNRRT on 20		St1Cas9 NNRGAAW on 19			LbCas12a & AsCas12a TTTV on 25				SpCas9-NRRH comp. NRRH on 22											SpCas9-NRTH NRTH on 23
rs72657694	ABCC6	368	pathogenic		TCTCCAAGGAGACAGACACGGTTGA<C>GTGGACATTCCAGACAAACTCCGGT	T	From C to T						KKH SaCas9 NNNRRT on 20				CjCas9 comp. NNNVRYM on 19						SpCas9-NRCH comp. NRCH on 22			enAsCas12a TGTV on 25
rs1474063386	ABCC6	368	pathogenic	Pseudoxanthoma elasticum (PXE)	CCCCTTCTTCCCTGAAGACCCCCAG<C>AGTCTGTAAGTCACCAAGTTCCAAC	T	From C to T						KKH SaCas9 NNNRRT on 20																				SpCas9-NRTH NRTH on 23
rs72653776	ABCC6	368	pathogenic	Pseudoxanthoma elasticum (PXE)	GACCTGCGGCTTCGGTTTTCCTAGG<C>CCGGGTGTCCTTTGACCGTCTGGTC	T	From C to T				VQR SpCas9 comp. NGAN on 23		KKH SaCas9 NNNRRT on 20									SpCas9-NRRH comp. NRRH on 22			AsCas12a RR TYCV on 25								SpCas9-NRTH NRTH on 23
rs63751262	ABCC6	368	pathogenic.uncertain-significance		CTGTGTCTGGCACGTGCCCTTCTCC<G>GAAGACCCAGATCCTCATCCTGGAC	C	From G to C	SpCas9 comp. NGG on 24																							SpCas9-NRRH comp. NGGN on 24 SpCas9-NRTH comp. NGGN on 24 SpCas9-NRCH comp. NGGN on 24	xCas9 comp. NG on 24 SpCas9-NG comp. NG on 24
rs63751318	ABCC6	368	pathogenic	Pseudoxanthoma elasticum (PXE)	TGGCAGGACCGGGGCAGGGAAGTCC<T>CCCTGGCCAGTGGGCTGCTGCGGCT	C	From T to C	SpCas9 comp. NGG on 23																	AsCas12a RR TYCV on 22						SpCas9-NRRH comp. NGGN on 23 SpCas9-NRTH comp. NGGN on 23 SpCas9-NRCH comp. NGGN on 23 SpCas9-NRRH comp. NGGN on 24 SpCas9-NRTH comp. NGGN on 24 SpCas9-NRCH comp. NGGN on 24	xCas9 comp. NG on 24 SpCas9-NG comp. NG on 24		St3Cas9 comp. NGGNG on 21 St3Cas9 comp. NGGNG on 23
rs772050759	ABCC6	368	pathogenic	Pseudoxanthoma elasticum (PXE)	CAATGCTCGCGTAGATGAAAGCCAG<A>GGATCAGTTTCCCGCGACTGGTGGC	G	From A to G	SpCas9 NGG on 23											SpCas9-NG NANG on 22						AsCas12a RR comp. TYCV on 22						SpCas9-NRRH NGGN on 23 SpCas9-NRTH NGGN on 23 SpCas9-NRCH NGGN on 23 SpCas9-NRRH NGGN on 24 SpCas9-NRTH NGGN on 24 SpCas9-NRCH NGGN on 24	xCas9 NG on 24 SpCas9-NG NG on 24		St3Cas9 NGGNG on 23
rs774648925	ABCC6	368	pathogenic	Pseudoxanthoma elasticum (PXE)	CTGGGCGCCTTGCGGACCTCCGGCC<T>CCTCTTCTCTGTGTCGCTGGTGTCC	C	From T to C	SpCas9 comp. NGG on 23																							SpCas9-NRRH comp. NGGN on 23 SpCas9-NRTH comp. NGGN on 23 SpCas9-NRCH comp. NGGN on 23 SpCas9-NRRH comp. NGGN on 24 SpCas9-NRTH comp. NGGN on 24 SpCas9-NRCH comp. NGGN on 24	xCas9 comp. NG on 24 SpCas9-NG comp. NG on 24		St3Cas9 comp. NGGNG on 23
rs72664289	ABCC6	368	pathogenic	Pseudoxanthoma elasticum (PXE)	AGGCTACTGCTGCCGTGGACCCTGG<C>ACGGAGCTGCAGATGCAGGCCATGC	T	From C to T						KKH SaCas9 NNNRRT on 20				CjCas9 comp. NNNVRYM on 19																SpCas9-NRTH NRTH on 23 SpCas9-NRTH comp. NRTH on 22
rs940803158	ABCC6	368	pathogenic	Pseudoxanthoma elasticum (PXE)	AGGGGTCTGGGTACCCCCCATGTAC<C>TCTGGGTCCTTGGTCCCATCTACCT	G	From C to G										CjCas9 NNNVRYM on 21		SpCas9-NG NANG on 22			SpCas9-NRRH comp. NRRH on 22										xCas9 NG on 24 SpCas9-NG NG on 24	SpCas9-NRTH NRTH on 24
rs775319351	ABCC6	368	pathogenic		CAGAAACAGCTCCTGTGTCTGGCAC<G>TGCCCTTCTCCGGAAGACCCAGATC	C	From G to C	SpCas9 comp. NGG on 24					KKH SaCas9 comp. NNNRRT on 22				CjCas9 NNNVRYM on 19					SpCas9-NRRH comp. NRRH on 24	SpCas9-NRCH NRCH on 22								SpCas9-NRRH comp. NGGN on 24 SpCas9-NRTH comp. NGGN on 24 SpCas9-NRCH comp. NGGN on 24	xCas9 comp. NG on 24 SpCas9-NG comp. NG on 24		St3Cas9 comp. NGGNG on 24
rs63751325	ABCC6	368	pathogenic	Pseudoxanthoma elasticum (PXE)	TCCCAACCCCGGGCAGGTGGGCATC<G>TTGGCAGGACCGGGGCAGGGAAGTC	T	From G to T											LbCas12a & AsCas12a TTTV on 25				SpCas9-NRRH comp. NRRH on 24
rs1481200467	ABCC6	368	pathogenic	Pseudoxanthoma elasticum (PXE)	CCTCTAAATGACAGGTCCATCAAGT<C>AGTCCCTGAGAAGGACCGTACCACT	G	From C to G			EQR SpCas9 NGAG on 24	VQR SpCas9 NGAN on 24	SaCas9 NNGRRT on 23								SpCas9 (From Strep. past.) NNGTGA on 21												xCas9 NG on 24 SpCas9-NG NG on 24
rs72653703	ABCC6	368	pathogenic	Pseudoxanthoma elasticum (PXE)	GATGGGTTCCTACCAGGAGCTTCTG<C>AGAGGAAGGGGGCCCTCATGTGTCT	T	From C to T																			enAsCas12a TGTV on 23							SpCas9-NRTH NRTH on 23
rs63750700_0	ABCC6	368	pathogenic	Pseudoxanthoma elasticum (PXE)	AGCTAATTGTCCCAATCGTTCCCAG<C>GTGGGCCAGAAACAGCTCCTGTGTC	A	From C to A			EQR SpCas9 NGAG on 23	VQR SpCas9 NGAN on 23	SaCas9 NNGRRT on 22	KKH SaCas9 NNNRRT on 22									SpCas9-NRRH NRRH on 24	SpCas9-NRCH comp. NRCH on 22
rs63750700_1	ABCC6	368	pathogenic		AGCTAATTGTCCCAATCGTTCCCAG<C>GTGGGCCAGAAACAGCTCCTGTGTC	T	From C to T						KKH SaCas9 NNNRRT on 20				CjCas9 comp. NNNVRYM on 19						SpCas9-NRCH comp. NRCH on 22			enAsCas12a TGTV on 25
rs72653765	ABCC6	368	pathogenic	Pseudoxanthoma elasticum (PXE)	GGTGATGTGGTCAATCTGGTGTCCG<T>GGACGTGCAGCGGCTGACCGAGAGC	C	From T to C		VRER SpCas9 NGCG on 23 VRER SpCas9 comp. NGCG on 24																							xCas9 comp. NG on 24 SpCas9-NG comp. NG on 24
rs63750295	ABCC6	368	pathogenic	Pseudoxanthoma elasticum (PXE)	CTTCTCCGGAAGACCCAGATCCTCA<T>CCTGGACGAGGCTACTGCTGCCGTG	C	From T to C	SpCas9 comp. NGG on 23												SpCas9 (From Strep. past.) comp. NNGTGA on 23			SpCas9-NRCH NRCH on 23								SpCas9-NRTH comp. NGGN on 23 SpCas9-NRCH comp. NGGN on 23	xCas9 comp. NG on 24 SpCas9-NG comp. NG on 24		St3Cas9 comp. NGGNG on 23
rs66616070_0	ABCC6	368	pathogenic		GGGAATCCACACTTCAATTGGGGAG<C>AGGTGAGAGTTTGGGGGTCTTTTTG	G	From C to G	SpCas9 NGG on 23		EQR SpCas9 NGAG on 24	VQR SpCas9 NGAN on 24								SpCas9-NG NANG on 22			SpCas9-NRRH NRRH on 23									SpCas9-NRRH NGGN on 23 SpCas9-NRTH NGGN on 23	xCas9 NG on 24 SpCas9-NG NG on 24		St3Cas9 NGGNG on 23
rs66616070_1	ABCC6	368	pathogenic	Pseudoxanthoma elasticum (PXE)	GGGAATCCACACTTCAATTGGGGAG<C>AGGTGAGAGTTTGGGGGTCTTTTTG	T	From C to T					SaCas9 NNGRRT on 20	KKH SaCas9 NNNRRT on 20																				SpCas9-NRTH NRTH on 23
rs114149656	ABCC6	368	pathogenic		GTTTGCTGTCCACACTCTGGTGGCC<G>AGAATGCTATGAATGCAGAGAAAGC	A	From G to A																				enAsCas12a comp. VTTV on 23	FnCas12a comp. TTV on 24
rs376518465_0	ABCC6	368	pathogenic		CCCGCCAGGTCCTGGCTCTGTCCAG<C>GGCTCCAGAAAGGCCAGTGCGGTGG	A	From C to A			EQR SpCas9 NGAG on 23	VQR SpCas9 NGAN on 23								SpCas9-NG NANG on 24
rs376518465_1	ABCC6	368	pathogenic		CCCGCCAGGTCCTGGCTCTGTCCAG<C>GGCTCCAGAAAGGCCAGTGCGGTGG	T	From C to T						KKH SaCas9 NNNRRT on 20
rs72653761	ABCC6	368	pathogenic	Pseudoxanthoma elasticum (PXE)	GCTCAAGGTGCTGCAGATGAGGTTG<C>GGTCGGCCATCACTGGCCTGGTGTA	T	From C to T																			enAsCas12a TGTV on 23
rs72653755	ABCC6	368	pathogenic	Pseudoxanthoma elasticum (PXE)	CCTCTTTTGCAGCCTGGTCTGGAGG<G>GATACAGGAGGCCACTGAGACCAAA	A	From G to A			EQR SpCas9 NGAG on 23	VQR SpCas9 NGAN on 23											SpCas9-NRRH NRRH on 22
rs72653760	ABCC6	368	pathogenic	Pseudoxanthoma elasticum (PXE)	CCTGCAAACGCTGTTTGAGCAGCAG<A>ACATGTACAGGCTCAAGGTGCTGCA	G	From A to G	SpCas9 NGG on 23			VQR SpCas9 NGAN on 24								SpCas9-NG NANG on 22							enAsCas12a comp. TGTV on 22					SpCas9-NRTH NGGN on 23 SpCas9-NRCH NGGN on 23	xCas9 NG on 24 SpCas9-NG NG on 24
rs72653786	ABCC6	368	pathogenic		CTGTTCCTTTTGTGGCCACAGGGCA<T>GAATCTCTCCGGAGGCCAGAAGCAG	C	From T to C																									xCas9 comp. NG on 24 SpCas9-NG comp. NG on 24
rs1333662666	ABCC6	368	pathogenic		AGATGCAGGCCATGCTCGGGAGCTG<G>TTTGCACAGTGCACTGTGCTGCTCA	T	From G to T									TdCas9 comp. NAAAAC on 21	CjCas9 comp. NNNVRYM on 21					SpCas9-NRRH comp. NRRH on 23	SpCas9-NRCH comp. NRCH on 24						enAsCas12a TTTT on 25				SpCas9-NRTH NRTH on 23
rs72653781	ABCC6	368	pathogenic	Pseudoxanthoma elasticum (PXE)	TCTGCTGGCTGTTGTCGGTCCAGTG<G>GGGCAGGGAAGTCCTCCCTGCTGTC	T	From G to T										CjCas9 comp. NNNVRYM on 21						SpCas9-NRCH comp. NRCH on 24			enAsCas12a TGTV on 23
rs72653798	ABCC6	368	pathogenic	Pseudoxanthoma elasticum (PXE)	CCCCAGGCTGATTGGATCATAGTGC<T>GGCAAATGGGGCCATCGCAGAGATG	C	From T to C																								SpCas9-NRTH comp. NGGN on 24 SpCas9-NRCH comp. NGGN on 24	xCas9 comp. NG on 24 SpCas9-NG comp. NG on 24
rs387906859	ABCC6	368	pathogenic	Pseudoxanthoma elasticum (PXE). Generalized arterial calcification of infancy 2 (GACI2)	TGTCCCAATCGTTCCCAGCGTGGGC<C>AGAAACAGCTCCTGTGTCTGGCACG	A	From C to A												SpCas9-NG NANG on 24								enAsCas12a comp. VTTV on 23	FnCas12a comp. TTV on 24
rs63750459	ABCC6	368	pathogenic.likely-pathogenic	Pseudoxanthoma elasticum (PXE). Abnormality of the eye	TCTGTCTGCTCCCACATGGCTGAGA<C>GTTCCAGGGCAGCACAGTGGTCCGG	T	From C to T						KKH SaCas9 NNNRRT on 20				CjCas9 comp. NNNVRYM on 19						SpCas9-NRCH comp. NRCH on 22
rs63751279	ABCC6	368	pathogenic	Pseudoxanthoma elasticum (PXE)	GGACAAGGGGCAGGTGGCAGAGAGC<G>GCAGCCCGGCCCAGCTGCTGGCCCA	A	From G to A										CjCas9 NNNVRYM on 19						SpCas9-NRCH NRCH on 22
rs78678589	ABCC6	368	pathogenic	Pseudoxanthoma elasticum (PXE)	CTACCTTCCTCCTGGGGACCCTCAG<C>CTCATCATCAGTGATGTCTTCAGGT	A	From C to A				VQR SpCas9 NGAN on 23	SaCas9 comp. NNGRRT on 20	KKH SaCas9 comp. NNNRRT on 20				CjCas9 comp. NNNVRYM on 20					SpCas9-NRRH NRRH on 23 SpCas9-NRRH comp. NRRH on 22	SpCas9-NRCH NRCH on 24										SpCas9-NRTH comp. NRTH on 23
rs63750992	ABCC6	368	pathogenic	Pseudoxanthoma elasticum (PXE)	GCAGGGAAGTCCTCCCTGGCCAGTG<G>GCTGCTGCGGCTCCAGGAGGCAGCT	A	From G to A			EQR SpCas9 NGAG on 23	VQR SpCas9 NGAN on 23									SpCas9 (From Strep. past.) NNGTGA on 20
rs58694313	ABCC6	368	benign.pathogenic	Pseudoxanthoma elasticum (PXE)	GCAGGGCGTGTCCTTCAAGATCCAC<G>CAGGAGAGAAGGTGAGTGGTTCTCT	A	From G to A										CjCas9 NNNVRYM on 19						SpCas9-NRCH NRCH on 22			enAsCas12a comp. TGTV on 23 enAsCas12a comp. TGTV on 25
rs72547524	ABCC6	368	pathogenic.uncertain-significance	Pseudoxanthoma elasticum (PXE)	GTGCACTGTGCTGCTCATTGCCCAC<C>GCCTGCGCTCCGTGATGGACTGTGC	T	From C to T										CjCas9 comp. NNNVRYM on 19						SpCas9-NRCH comp. NRCH on 22
rs57499803_0	ABCC6	368	pathogenic		CAGCTGAGGGTGGGATCTGGATCGA<C>GGGGTCCCCATTGCCCACGTGGGGC	A	From C to A												SpCas9-NG NANG on 24						AsCas12a RR comp. TYCV on 25		enAsCas12a comp. VTTV on 24	FnCas12a comp. TTV on 25		enAsCas12a comp. TTCN on 25 Cas12e (CasX) comp. TTCN on 25
rs57499803_1	ABCC6	368	pathogenic	Pseudoxanthoma elasticum (PXE)	CAGCTGAGGGTGGGATCTGGATCGA<C>GGGGTCCCCATTGCCCACGTGGGGC	T	From C to T						KKH SaCas9 NNNRRT on 20
rs72657692	ABCC6	368	pathogenic	Pseudoxanthoma elasticum (PXE)	GGCAGCCCTGCGTGGCGGGATCTTC<G>GGCTCCTCGGCTGTCTCCAAGGTAC	C	From G to C	SpCas9 comp. NGG on 24														SpCas9-NRRH comp. NRRH on 24			AsCas12a RR TYCV on 23						SpCas9-NRRH comp. NGGN on 24 SpCas9-NRTH comp. NGGN on 24 SpCas9-NRCH comp. NGGN on 24	xCas9 comp. NG on 24 SpCas9-NG comp. NG on 24
rs72653777	ABCC6	368	pathogenic	Pseudoxanthoma elasticum (PXE)	TTCCTAGGCCCGGGTGTCCTTTGAC<C>GTCTGGTCACCTTCCTCTGCCTGGA	T	From C to T										CjCas9 comp. NNNVRYM on 19						SpCas9-NRCH comp. NRCH on 22			enAsCas12a TGTV on 25
rs60975032_0	ABCC6	368	pathogenic	Pseudoxanthoma elasticum (PXE)	ACAAACTCCGGTCCCTGCTGATGTA<C>GCCTTTGGACTCCTGGAGGTCAGCC	A	From C to A															SpCas9-NRRH NRRH on 24	SpCas9-NRCH comp. NRCH on 22				enAsCas12a comp. VTTV on 24	FnCas12a comp. TTV on 25
rs60975032_1	ABCC6	368	pathogenic		ACAAACTCCGGTCCCTGCTGATGTA<C>GCCTTTGGACTCCTGGAGGTCAGCC	T	From C to T										CjCas9 comp. NNNVRYM on 19						SpCas9-NRCH comp. NRCH on 22	AsCas12a RVR TATV on 23
rs368017088_0	ABCC6	368	pathogenic		GAAGACCATCAAGTTCCATGGCTGG<G>AGGGAGCCTTTCTGGACAGAGTCCT	C	From G to C										CjCas9 NNNVRYM on 20					SpCas9-NRRH NRRH on 22	SpCas9-NRCH NRCH on 23 SpCas9-NRCH comp. NRCH on 24									xCas9 comp. NG on 24 SpCas9-NG comp. NG on 24
rs368017088_1	ABCC6	368	pathogenic	Pseudoxanthoma elasticum (PXE)	GAAGACCATCAAGTTCCATGGCTGG<G>AGGGAGCCTTTCTGGACAGAGTCCT	T	From G to T						KKH SaCas9 NNNRRT on 20				CjCas9 NNNVRYM on 20					SpCas9-NRRH NRRH on 22	SpCas9-NRCH comp. NRCH on 24										SpCas9-NRTH NRTH on 23
rs59002125	ABCC6	368	pathogenic.likely-benign	Pseudoxanthoma elasticum (PXE)	GGGCTGTCTGCTGGCTGTTGTCGGT<C>CAGTGGGGGCAGGGAAGTCCTCCCT	T	From C to T				VQR SpCas9 comp. NGAN on 23																enAsCas12a VTTV on 23	FnCas12a TTV on 24		enAsCas12a TTCN on 24 Cas12e (CasX) TTCN on 24
rs766105758	ABCC6	368	pathogenic		GGCAGCTGAGGGTGGGATCTGGATC<G>ACGGGGTCCCCATTGCCCACGTGGG	A	From G to A																				enAsCas12a comp. VTTV on 23	FnCas12a comp. TTV on 24
rs63750607	ABCC6	368	pathogenic	Pseudoxanthoma elasticum (PXE)	GCCCACCTCAGTGCTGGCCTCGTGG<G>CTTCTCTGTCTCTGCTGCCCTCCAG	A	From G to A				VQR SpCas9 NGAN on 23		KKH SaCas9 comp. NNNRRT on 20									SpCas9-NRRH NRRH on 22			AsCas12a RR comp. TYCV on 25								SpCas9-NRTH comp. NRTH on 23
rs763591743	ABCC6	368	pathogenic		CCACTGAGACCAAAAGACCTCTGGT<C>GCTTGGGAGAGAAAACTCCTCAGAA	T	From C to T										CjCas9 comp. NNNVRYM on 19						SpCas9-NRCH comp. NRCH on 22				enAsCas12a VTTV on 23	FnCas12a TTV on 24
rs776463091	ABCC6	368	pathogenic	Pseudoxanthoma elasticum (PXE)	GGCCAGCATGTCTTCAACCAGGTCA<T>TGGGCCTGGTGGACTACTCCAGGGA	C	From T to C													SpCas9 (From Strep. past.) comp. NNGTGA on 23			SpCas9-NRCH NRCH on 23									xCas9 comp. NG on 24 SpCas9-NG comp. NG on 24
rs72664283	ABCC6	368	benign.pathogenic.likely-benign	Pseudoxanthoma elasticum (PXE)	TCCTCGCCGTGCTGATGTTCCTCTC<A>GCCTGCCTGCAAACGCTGTTTGAGC	G	From A to G										CjCas9 comp. NNNVRYM on 19														SpCas9-NRTH NGGN on 24 SpCas9-NRCH NGGN on 24	xCas9 NG on 24 SpCas9-NG NG on 24
rs769405586	ABCC6	368	pathogenic		AATCTCTCCGGAGGCCAGAAGCAGC<G>GCTGAGCCTGGCCCGGGCTGTATAC	T	From G to T															SpCas9-NRRH comp. NRRH on 24	SpCas9-NRCH NRCH on 22
rs746428588	ABCC6	368	pathogenic	Pseudoxanthoma elasticum (PXE)	TCTGGTGTCCGTGGACGTGCAGCGG<C>TGACCGAGAGCGTCCTCTACCTCAA	G	From C to G	SpCas9 NGG on 23				SaCas9 NNGRRT on 21	KKH SaCas9 NNNRRT on 21				CjCas9 comp. NNNVRYM on 20			SpCas9 (From Strep. past.) NNGTGA on 23		SpCas9-NRRH NRRH on 23	SpCas9-NRCH comp. NRCH on 23								SpCas9-NRRH NGGN on 23 SpCas9-NRTH NGGN on 23	xCas9 NG on 24 SpCas9-NG NG on 24		St3Cas9 NGGNG on 23
rs72653800_0	ABCC6	368	pathogenic		ACCCCAGAGGCACCTCTGCAGGCAG<G>AGGCCCGAGCTTAGACGCGAGAGGT	A	From G to A				VQR SpCas9 NGAN on 23											SpCas9-NRRH NRRH on 22					enAsCas12a comp. VTTV on 23	FnCas12a comp. TTV on 24		enAsCas12a comp. TTCN on 24 Cas12e (CasX) comp. TTCN on 24
rs72653800_1	ABCC6	368	pathogenic	Pseudoxanthoma elasticum (PXE)	ACCCCAGAGGCACCTCTGCAGGCAG<G>AGGCCCGAGCTTAGACGCGAGAGGT	T	From G to T						KKH SaCas9 NNNRRT on 20				CjCas9 NNNVRYM on 20					SpCas9-NRRH NRRH on 22	SpCas9-NRCH comp. NRCH on 24										SpCas9-NRTH NRTH on 23
rs749035807	ABCC6	368	pathogenic	Pseudoxanthoma elasticum (PXE)	CGGCCAGCTGCAGTACAAGTGTGCT<G>ACCGAGGCGAGGACCTGAGGTATGG	A	From G to A																				enAsCas12a comp. VTTV on 23	FnCas12a comp. TTV on 24
rs72653758	ABCC6	368	pathogenic	Pseudoxanthoma elasticum (PXE)	TGGAAGGGCTACCTCCTCGCCGTGC<T>GATGTTCCTCTCAGCCTGCCTGCAA	G	From T to G	SpCas9 NGG on 24	VRER SpCas9 NGCG on 22			SaCas9 NNGRRT on 23										SpCas9-NRRH NRRH on 24			AsCas12a RR comp. TYCV on 23						SpCas9-NRRH NGGN on 24 SpCas9-NRTH NGGN on 24 SpCas9-NRCH NGGN on 24	xCas9 NG on 24 SpCas9-NG NG on 24
rs63750494	ABCC6	368	pathogenic	Pseudoxanthoma elasticum (PXE)	GGGCAGGTGGGCATCGTTGGCAGGA<C>CGGGGCAGGGAAGTCCTCCCTGGCC	T	From C to T				VQR SpCas9 comp. NGAN on 23	SaCas9 NNGRRT on 20	KKH SaCas9 NNNRRT on 20																				SpCas9-NRTH NRTH on 23
rs776513864_1	ABCC6	368	uncertain-significance.pathogenic		CCAGAAGCAGCGGCTGAGCCTGGCC<C>GGGCTGTATACAGAAAGGCAGCTGT	G	From C to G	SpCas9 NGG on 24																							SpCas9-NRRH NGGN on 24 SpCas9-NRTH NGGN on 24 SpCas9-NRCH NGGN on 24	xCas9 NG on 24 SpCas9-NG NG on 24		St3Cas9 NGGNG on 24
rs72653796	ABCC6	368	pathogenic	Pseudoxanthoma elasticum (PXE)	CCTGCCCAGACACGGATTCTCGTGA<C>GCACGCACTCCACATCCTGCCCCAG	T	From C to T						KKH SaCas9 NNNRRT on 20										SpCas9-NRCH comp. NRCH on 22
rs63750414	ABCC6	368	pathogenic	Pseudoxanthoma elasticum (PXE)	GGGGTCCCCATTGCCCACGTGGGGC<T>GCACACACTGCGCTCCAGGATCAGC	C	From T to C		VRER SpCas9 comp. NGCG on 22								CjCas9 NNNVRYM on 19 CjCas9 NNNVRYM on 22														SpCas9-NRTH comp. NGGN on 24 SpCas9-NRCH comp. NGGN on 24	xCas9 comp. NG on 24 SpCas9-NG comp. NG on 24
rs72653775	ABCC6	368	pathogenic	Pseudoxanthoma elasticum (PXE)	CACACTCTGGTGGCCGAGAATGCTA<T>GAATGCAGAGAAAGCCTTTGTGACT	C	From T to C																									xCas9 comp. NG on 24 SpCas9-NG comp. NG on 24
rs63751086	ABCC6	368	pathogenic.uncertain-significance	Pseudoxanthoma elasticum (PXE)	TCCTCCCTGGCCAGTGGGCTGCTGC<G>GCTCCAGGAGGCAGCTGAGGGTGGG	A	From G to A																SpCas9-NRCH NRCH on 22
rs58668703	ABCC6	368	pathogenic	Pseudoxanthoma elasticum (PXE)	TGTGTCTGGCACGTGCCCTTCTCCG<G>AAGACCCAGATCCTCATCCTGGACG	A	From G to A				VQR SpCas9 NGAN on 23							LbCas12a & AsCas12a comp. TTTV on 23										FnCas12a comp. TTV on 24		enAsCas12a comp. TTCN on 24 Cas12e (CasX) comp. TTCN on 24
rs72664281	ABCC6	368	pathogenic	Pseudoxanthoma elasticum (PXE)	CTCTGGTGGTGGCACAGTTTGTGCT<G>TCCTGCCTGGCGGATCAACCCCCCT	A	From G to A					SaCas9 comp. NNGRRT on 20	KKH SaCas9 comp. NNNRRT on 20											AsCas12a RVR TATV on 24									SpCas9-NRTH comp. NRTH on 23
rs72653754	ABCC6	368	pathogenic	Pseudoxanthoma elasticum (PXE)	TCCCCTCCAAAGCCACGTTCTGGTG<G>GTTTCTGGGTAAGTAAAGTCGCACG	T	From G to T										CjCas9 comp. NNNVRYM on 21						SpCas9-NRCH comp. NRCH on 24			enAsCas12a TGTV on 23
rs57794451	ABCC6	368	pathogenic		CTGAGCCTGGCCCGGGCTGTATACA<G>AAAGGCAGCTGTGTACCTGCTGGAT	T	From G to T										CjCas9 NNNVRYM on 20		SpCas9-NG comp. NANG on 24					AsCas12a RVR comp. TATV on 24									SpCas9-NRTH NRTH on 23
rs761433545	ABCC6	368	pathogenic		TCCTAGGCCCGGGTGTCCTTTGACC<G>TCTGGTCACCTTCCTCTGCCTGGAA	A	From G to A						KKH SaCas9 comp. NNNRRT on 20
rs72653769	ABCC6	368	pathogenic	Pseudoxanthoma elasticum (PXE)	CGGGCACGGCTCACCAGCTCTATCC<T>CAGGAACTCGAAGACCATCAAGTTC	A	From T to A										CjCas9 NNNVRYM on 21						SpCas9-NRCH NRCH on 24		AsCas12a RR TYCV on 22	enAsCas12a comp. TGTV on 23
rs957828732	ABCC6	368	pathogenic	Pseudoxanthoma elasticum (PXE)	CCTGTGTACCTCCAGCGTGGCTGTC<G>CTCTTTGGAAAATCCAACAGGGAAC	A	From G to A					SaCas9 comp. NNGRRT on 20	KKH SaCas9 comp. NNNRRT on 20							SpCas9 (From Strep. past.) comp. NNGTGA on 22
rs59206042	ABCC6	368	pathogenic	Pseudoxanthoma elasticum (PXE)	TGCAGGCAGGAGGCCCGAGCTTAGA<C>GCGAGAGGTGAGTCCACCATGGTGC	T	From C to T						KKH SaCas9 NNNRRT on 20				CjCas9 comp. NNNVRYM on 19						SpCas9-NRCH comp. NRCH on 22
rs67470842	ABCC6	368	pathogenic	Pseudoxanthoma elasticum (PXE)	GTGGGGGCAGGGAAGTCCTCCCTGC<T>GTCCGCCCTCCTTGGGGAGCTGTCA	C	From T to C										CjCas9 NNNVRYM on 22		SpCas9-NG comp. NANG on 22												SpCas9-NRTH comp. NGGN on 24 SpCas9-NRCH comp. NGGN on 24	xCas9 comp. NG on 24 SpCas9-NG comp. NG on 24
rs72653746	ABCC6	368	pathogenic	Pseudoxanthoma elasticum (PXE)	CAGCATCGTGTCAGTGGAGCGGATG<C>AGGACTATGCCTGGACGCCCAAGGA	T	From C to T																			enAsCas12a TGTV on 23							SpCas9-NRTH NRTH on 23
rs72657689	ABCC6	368	pathogenic.uncertain-significance	Pseudoxanthoma elasticum (PXE)	CGTGGGCACCCCCCTCTGCCTCTAC<G>CACTCTTCCTCTTCCTCTGCCAGCA	A	From G to A																SpCas9-NRCH NRCH on 22			enAsCas12a comp. TGTV on 23 enAsCas12a comp. TGTV on 25
rs768271196	ABCC6	368	pathogenic	Pseudoxanthoma elasticum (PXE)	TCCTTTGACCGTCTGGTCACCTTCC<T>CTGCCTGGAAGAAGTTGACCCTGGT	C	From T to C	SpCas9 comp. NGG on 23											SpCas9-NG comp. NANG on 22						AsCas12a RR TYCV on 22						SpCas9-NRRH comp. NGGN on 23 SpCas9-NRTH comp. NGGN on 23 SpCas9-NRCH comp. NGGN on 23 SpCas9-NRRH comp. NGGN on 24 SpCas9-NRTH comp. NGGN on 24 SpCas9-NRCH comp. NGGN on 24	xCas9 comp. NG on 24 SpCas9-NG comp. NG on 24		St3Cas9 comp. NGGNG on 23
rs1311228469	ABCC6	368	pathogenic	Pseudoxanthoma elasticum (PXE)	TCAGCCCCCCTGGCCTCAGGGCGGG<C>AGATCGAGTTCCGGGACTTTGGGCT	T	From C to T					SaCas9 NNGRRT on 20	KKH SaCas9 NNNRRT on 20																				SpCas9-NRTH NRTH on 23
rs72657693	ABCC6	368	pathogenic	Pseudoxanthoma elasticum (PXE)	CATTGGTCACCTGCTAAACCGCTTC<T>CCAAGGAGACAGACACGGTTGACGT	G	From T to G		VRER SpCas9 comp. NGCG on 23								CjCas9 NNNVRYM on 21						SpCas9-NRCH NRCH on 24		AsCas12a RR TYCV on 22							xCas9 NG on 24 SpCas9-NG NG on 24
rs67996819	ABCC6	368	pathogenic	Pseudoxanthoma elasticum (PXE)	GCTCCTGGGGCCCTCCGCCCTCACT<G>CCATCGCTGTCTTCCTGAGCCTCCT	C	From G to C	SpCas9 comp. NGG on 23		EQR SpCas9 comp. NGAG on 24	VQR SpCas9 comp. NGAN on 24	SaCas9 comp. NNGRRT on 23										SpCas9-NRRH comp. NRRH on 23			AsCas12a RR TYCV on 24						SpCas9-NRRH comp. NGGN on 23 SpCas9-NRTH comp. NGGN on 23	xCas9 comp. NG on 24 SpCas9-NG comp. NG on 24		St3Cas9 comp. NGGNG on 23
rs72650698	ABCC6	368	pathogenic	Pseudoxanthoma elasticum (PXE)	GCTGATGTTCCTCTCAGCCTGCCTG<C>AAACGCTGTTTGAGCAGCAGAACAT	T	From C to T																			enAsCas12a TGTV on 23							SpCas9-NRTH NRTH on 23
rs63750622	ABCC6	368	pathogenic.likely-pathogenic	Pseudoxanthoma elasticum (PXE)	GCCCACGTGGGGCTGCACACACTGC<G>CTCCAGGATCAGCATCATCCCCCAG	T	From G to T			EQR SpCas9 comp. NGAG on 23	VQR SpCas9 comp. NGAN on 23											SpCas9-NRRH comp. NRRH on 24	SpCas9-NRCH NRCH on 22
rs72657690	ABCC6	368	pathogenic	Pseudoxanthoma elasticum (PXE)	ACCCCCCTCTGCCTCTACGCACTCT<T>CCTCTTCCTCTGCCAGCAAGTGGCC	G	From T to G										CjCas9 comp. NNNVRYM on 20						SpCas9-NRCH NRCH on 24 SpCas9-NRCH comp. NRCH on 23									xCas9 NG on 24 SpCas9-NG NG on 24
rs72657696	ABCC6	368	pathogenic	Pseudoxanthoma elasticum (PXE)	CTCTTCATCCACCACCATGGCCGGG<G>CTACCTCCGGATGTCCCCACTCTTC	A	From G to A				VQR SpCas9 NGAN on 23		KKH SaCas9 comp. NNNRRT on 20									SpCas9-NRRH NRRH on 22			AsCas12a RR comp. TYCV on 25								SpCas9-NRTH comp. NRTH on 23
rs63750428_0	ABCC6	368	pathogenic.likely-benign		CCCCATCCTGTTCCCTGGCTCTCTG<C>GGATGAACCTCGACCTGCTGCAGGA	A	From C to A			EQR SpCas9 NGAG on 23	VQR SpCas9 NGAN on 23								SpCas9-NG NANG on 24
rs63750428_1	ABCC6	368	pathogenic.likely-benign	Pseudoxanthoma elasticum (PXE)	CCCCATCCTGTTCCCTGGCTCTCTG<C>GGATGAACCTCGACCTGCTGCAGGA	T	From C to T																			enAsCas12a TGTV on 23
rs63751241	ABCC6	368	pathogenic	Pseudoxanthoma elasticum (PXE)	GCAGTACAAGTGTGCTGACCGAGGC<G>AGGACCTGAGGTATGGTCGTCCCAC	A	From G to A										CjCas9 NNNVRYM on 19						SpCas9-NRCH NRCH on 22				enAsCas12a comp. VTTV on 23	FnCas12a comp. TTV on 24
rs72653794	ABCC6	368	pathogenic.likely-pathogenic	Pseudoxanthoma elasticum (PXE)	TTCTACCCCTTCCCTGCCCAGACAC<G>GATTCTCGTGACGCACGCACTCCAC	A	From G to A										CjCas9 NNNVRYM on 19						SpCas9-NRCH NRCH on 22			enAsCas12a comp. TGTV on 25
rs63751215	ABCC6	368	pathogenic	Pseudoxanthoma elasticum (PXE)	GACCCAGACACTGCAGTGGGTTGTT<C>GCAACTGGACAGACCTAGAGAACAG	T	From C to T											LbCas12a & AsCas12a TTTV on 23					SpCas9-NRCH comp. NRCH on 22					FnCas12a TTV on 24
rs72653784_0	ABCC6	368	pathogenic		GTGCTGTGGCCTACGTGCCCCAGGA<G>GCCTGGGTGCAGAACACCTCTGTGG	A	From G to A															SpCas9-NRRH NRRH on 22			AsCas12a RR comp. TYCV on 25		enAsCas12a comp. VTTV on 24	FnCas12a comp. TTV on 25		enAsCas12a comp. TTCN on 25 Cas12e (CasX) comp. TTCN on 25
rs72653784_1	ABCC6	368	pathogenic	Pseudoxanthoma elasticum (PXE)	GTGCTGTGGCCTACGTGCCCCAGGA<G>GCCTGGGTGCAGAACACCTCTGTGG	T	From G to T					SaCas9 NNGRRT on 20	KKH SaCas9 NNNRRT on 20				CjCas9 comp. NNNVRYM on 21					SpCas9-NRRH NRRH on 22											SpCas9-NRTH comp. NRTH on 24
rs72657699	ABCC6	368	pathogenic.likely-benign	Pseudoxanthoma elasticum (PXE)	CTTCCTCCTGGGGACCCTCAGCCTC<A>TCATCAGTGATGTCTTCAGGTTCAC	G	From A to G																									xCas9 NG on 24 SpCas9-NG NG on 24
rs1235912910	ABCC6	368	pathogenic	Pseudoxanthoma elasticum (PXE)	GGTCTGGAACCAGACAGAGCCTGAA<C>CTGCCGCCACCAGCCTGCTGAGCCT	T	From C to T				VQR SpCas9 comp. NGAN on 23	SaCas9 NNGRRT on 20	KKH SaCas9 NNNRRT on 20	NmCas9 comp. NNNNGATT on 20								SpCas9-NRRH comp. NRRH on 22											SpCas9-NRTH NRTH on 23
rs760376992	ABCC6	368	pathogenic	Pseudoxanthoma elasticum (PXE)	AGCTCAGCCCCCCTGGCCTCAGGGC<G>GGCAGATCGAGTTCCGGGACTTTGG	A	From G to A										CjCas9 NNNVRYM on 19						SpCas9-NRCH NRCH on 22
rs72653751	ABCC6	368	pathogenic	Pseudoxanthoma elasticum (PXE)	CCCCCACAGGGTTCTGGTCATGGAC<A>AGGGGCAGGTGGCAGAGAGCGGCAG	T	From A to T						KKH SaCas9 comp. NNNRRT on 22				CjCas9 comp. NNNVRYM on 22					SpCas9-NRRH comp. NRRH on 24
rs63749992	ABCC6	368	pathogenic	Pseudoxanthoma elasticum (PXE)	CGTGTCAGTGGAGCGGATGCAGGAC<T>ATGCCTGGACGCCCAAGGAGGTGAT	C	From T to C										CjCas9 NNNVRYM on 19		SpCas9-NG comp. NANG on 22												SpCas9-NRTH comp. NGGN on 24 SpCas9-NRCH comp. NGGN on 24	xCas9 comp. NG on 24 SpCas9-NG comp. NG on 24
rs63750987	ABCC6	368	pathogenic	Pseudoxanthoma elasticum (PXE)	AGACGCTTGGAGTCAGCCAGCTACT<C>GTCTGTCTGCTCCCACATGGCTGAG	T	From C to T										CjCas9 comp. NNNVRYM on 19						SpCas9-NRCH comp. NRCH on 22			enAsCas12a TGTV on 25	enAsCas12a VTTV on 23	FnCas12a TTV on 24
rs72653773	ABCC6	368	pathogenic	Pseudoxanthoma elasticum (PXE)	GACCTCCGGCCTCCTCTTCTCTGTG<T>CGCTGGTGTCCTTCCAAGTGTCTAC	C	From T to C	SpCas9 comp. NGG on 23															SpCas9-NRCH NRCH on 23								SpCas9-NRTH comp. NGGN on 23 SpCas9-NRCH comp. NGGN on 23	xCas9 comp. NG on 24 SpCas9-NG comp. NG on 24
rs72653766	ABCC6	368	pathogenic	Pseudoxanthoma elasticum (PXE)	GCTGCCTCTCGTCTGGATCGTGGTC<T>GCTTCGTCTATCTCTGGCAGGTATG	G	From T to G	SpCas9 NGG on 24														SpCas9-NRRH NRRH on 24									SpCas9-NRRH NGGN on 24 SpCas9-NRTH NGGN on 24 SpCas9-NRCH NGGN on 24	xCas9 NG on 24 SpCas9-NG NG on 24
rs72664285	ABCC6	368	pathogenic	Pseudoxanthoma elasticum (PXE)	CCAGCACCAAGGACCCCAGAGGCAC<C>TCTGCAGGCAGGAGGCCCGAGCTTA	A	From C to A						KKH SaCas9 comp. NNNRRT on 20				CjCas9 NNNVRYM on 21					SpCas9-NRRH comp. NRRH on 22				enAsCas12a comp. TGTV on 25							SpCas9-NRTH NRTH on 24
rs72653791	ABCC6	368	pathogenic	Pseudoxanthoma elasticum (PXE)	GTGTACCTGCTGGATGACCCCCTGG<C>GGCCCTGGATGCCCACGTTGGCCAG	T	From C to T						KKH SaCas9 NNNRRT on 20
rs72653799	ABCC6	368	pathogenic	Pseudoxanthoma elasticum (PXE)	AGGAAGGGGGCCCTCATGTGTCTTC<T>GGATCAAGCCAGACAGCCAGGAGAT	C	From T to C																		AsCas12a RR TYCV on 22 AsCas12a RR TYCV on 23						SpCas9-NRTH comp. NGGN on 24 SpCas9-NRCH comp. NGGN on 24	xCas9 comp. NG on 24 SpCas9-NG comp. NG on 24
rs66864704	ABCC6	368	pathogenic	Pseudoxanthoma elasticum (PXE)	AATGCTATGAATGCAGAGAAAGCCT<T>TGTGACTCTCACAGTTCTCAACATC	C	From T to C			EQR SpCas9 comp. NGAG on 24	VQR SpCas9 comp. NGAN on 24																					xCas9 comp. NG on 24 SpCas9-NG comp. NG on 24
rs63750125	ABCC6	368	pathogenic	Pseudoxanthoma elasticum (PXE)	GTGGGTTGTTCGCAACTGGACAGAC<C>TAGAGAACAGCATCGTGTCAGTGGA	A	From C to A										CjCas9 NNNVRYM on 21							AsCas12a RVR comp. TATV on 23		enAsCas12a comp. TGTV on 25							SpCas9-NRTH NRTH on 24
rs201766106	ABCC6	368	uncertain-significance.likely-pathogenic.pathogenic	Pseudoxanthoma elasticum (PXE)	ACAGGGCTTCCAGAGCGACCCTGTC<C>GCCACCTGTCCACCTACCTATGCCT	T	From C to T										CjCas9 comp. NNNVRYM on 19						SpCas9-NRCH comp. NRCH on 22
rs749125777	ABCC6	368	pathogenic	Pseudoxanthoma elasticum (PXE)	CAGGAAAGGACAGCATCCAATACGG<C>AGGGTAACCACCAGCTTCACCCACC	T	From C to T						KKH SaCas9 NNNRRT on 20																				SpCas9-NRTH NRTH on 23
rs369518454	ABCC6	368	pathogenic		CAAACTCCGGTCCCTGCTGATGTAC<G>CCTTTGGACTCCTGGAGGTCAGCCT	A	From G to A						KKH SaCas9 comp. NNNRRT on 20										SpCas9-NRCH NRCH on 22			enAsCas12a comp. TGTV on 25
rs59157279	ABCC6	368	pathogenic	Pseudoxanthoma elasticum (PXE)	CTGGGAGGGAGCCTTTCTGGACAGA<G>TCCTGGGCATCCGAGGCCAGGAGCT	A	From G to A					SaCas9 comp. NNGRRT on 20	KKH SaCas9 comp. NNNRRT on 20	NmCas9 comp. NNNNGATT on 19	St1Cas9 NNRGAAW on 20							SpCas9-NRRH NRRH on 22					enAsCas12a comp. VTTV on 24	FnCas12a comp. TTV on 25		enAsCas12a comp. TTCN on 25 Cas12e (CasX) comp. TTCN on 25			SpCas9-NRTH comp. NRTH on 23
rs72653779	ABCC6	368	pathogenic	Pseudoxanthoma elasticum (PXE)	TCCAGAATAAACCTCACGGTGCCCC<A>GGGCTGTCTGCTGGCTGTTGTCGGT	G	From A to G																								SpCas9-NRRH NGGN on 24 SpCas9-NRTH NGGN on 24 SpCas9-NRCH NGGN on 24	xCas9 NG on 24 SpCas9-NG NG on 24		St3Cas9 NGGNG on 24
rs72657700	ABCC6	368	pathogenic	Pseudoxanthoma elasticum (PXE)	CCCCTCTGCCTCTACGCACTCTTCC<T>CTTCCTCTGCCAGCAAGTGGCCTCC	A	From T to A						KKH SaCas9 comp. NNNRRT on 20										SpCas9-NRCH NRCH on 24		AsCas12a RR TYCV on 22
rs58695352	ABCC6	368	pathogenic		CCCTGGCTCTCTGCGGATGAACCTC<G>ACCTGCTGCAGGAGCACTCGGACGA	T	From G to T															SpCas9-NRRH comp. NRRH on 24
rs72653771	ABCC6	368	pathogenic	Pseudoxanthoma elasticum (PXE)	ATCCTCAGGAACTCGAAGACCATCA<A>GTTCCATGGCTGGGAGGGAGCCTTT	T	From A to T										CjCas9 comp. NNNVRYM on 19		SpCas9-NG comp. NANG on 24
rs63750018	ABCC6	368	pathogenic	Pseudoxanthoma elasticum (PXE)	CCGCCAGGACCCCATCCTGTTCCCT<G>GCTCTCTGCGGATGAACCTCGACCT	C	From G to C		VRER SpCas9 comp. NGCG on 22	EQR SpCas9 comp. NGAG on 24	VQR SpCas9 comp. NGAN on 24																					xCas9 comp. NG on 24 SpCas9-NG comp. NG on 24
rs72653764	ABCC6	368	pathogenic	Pseudoxanthoma elasticum (PXE)	CACCCGCCAGGTCCTGGCTCTGTCC<A>GCGGCTCCAGAAAGGCCAGTGCGGT	G	From A to G										CjCas9 comp. NNNVRYM on 19														SpCas9-NRTH NGGN on 24 SpCas9-NRCH NGGN on 24	xCas9 NG on 24 SpCas9-NG NG on 24		St3Cas9 NGGNG on 24
rs63749796	ABCC6	368	pathogenic	Pseudoxanthoma elasticum (PXE)	CATCGTGTCAGTGGAGCGGATGCAG<G>ACTATGCCTGGACGCCCAAGGAGGT	C	From G to C										CjCas9 NNNVRYM on 20					SpCas9-NRRH NRRH on 22	SpCas9-NRCH NRCH on 23 SpCas9-NRCH comp. NRCH on 24									xCas9 comp. NG on 24 SpCas9-NG comp. NG on 24
rs1192373126	ABCC6	368	pathogenic	Pseudoxanthoma elasticum (PXE)	GCCACTGTTCCTTTTGTGGCCACAG<G>GCATGAATCTCTCCGGAGGCCAGAA	A	From G to A			EQR SpCas9 NGAG on 23	VQR SpCas9 NGAN on 23											SpCas9-NRRH NRRH on 22
rs72653797	ABCC6	368	pathogenic	Pseudoxanthoma elasticum (PXE)	GCACGCACTCCACATCCTGCCCCAG<G>CTGATTGGATCATAGTGCTGGCAAA	C	From G to C	SpCas9 comp. NGG on 23									CjCas9 NNNVRYM on 20		SpCas9-NG comp. NANG on 22			SpCas9-NRRH NRRH on 22 SpCas9-NRRH comp. NRRH on 23	SpCas9-NRCH NRCH on 23 SpCas9-NRCH comp. NRCH on 24								SpCas9-NRRH comp. NGGN on 23 SpCas9-NRTH comp. NGGN on 23	xCas9 comp. NG on 24 SpCas9-NG comp. NG on 24
rs63750758	ABCC6	368	pathogenic	Pseudoxanthoma elasticum (PXE)	GCTACTCGTCTGTCTGCTCCCACAT<G>GCTGAGACGTTCCAGGGCAGCACAG	A	From G to A										CjCas9 NNNVRYM on 19							AsCas12a RVR comp. TATV on 25									SpCas9-NRTH NRTH on 22
rs72664286	ABCC6	368	pathogenic.likely-benign	Pseudoxanthoma elasticum (PXE)	CCACAGTGCACCTGGCCTACCTGCG<T>GCCGTGGGCACCCCCCTCTGCCTCT	G	From T to G	SpCas9 NGG on 23 SpCas9 NGG on 24									CjCas9 NNNVRYM on 22					SpCas9-NRRH NRRH on 24									SpCas9-NRRH NGGN on 23 SpCas9-NRTH NGGN on 23 SpCas9-NRCH NGGN on 23 SpCas9-NRRH NGGN on 24 SpCas9-NRTH NGGN on 24 SpCas9-NRCH NGGN on 24	xCas9 NG on 24 SpCas9-NG NG on 24
rs66492417	ABCC6	368	pathogenic	Pseudoxanthoma elasticum (PXE)	GGCTGAGCCTGGCCCGGGCTGTATA<C>AGAAAGGCAGCTGTGTACCTGCTGG	A	From C to A											LbCas12a & AsCas12a comp. TTTV on 24	SpCas9-NG NANG on 24			SpCas9-NRRH NRRH on 23						FnCas12a comp. TTV on 25
rs72664287	ABCC6	368	benign.pathogenic	Pseudoxanthoma elasticum (PXE)	CCTCCTTCTGCCGGGGCTACTGGCT<G>AGCCTGTGGGCGGACGACCCTGCAG	A	From G to A																				enAsCas12a comp. VTTV on 23	FnCas12a comp. TTV on 24
rs1315925055	ABCC6	368	pathogenic		TTTGCAGCCTGGTCTGGAGGGGATA<C>AGGAGGCCACTGAGACCAAAAGACC	T	From C to T																	AsCas12a RVR TATV on 23 AsCas12a RVR comp. TATV on 24									SpCas9-NRTH NRTH on 23
rs192110266	ABCC6	368	benign.pathogenic	Pseudoxanthoma elasticum (PXE)	TTCCCTCCCACAGGGCTTCCAGAGC<G>ACCCTGTCCGCCACCTGTCCACCTA	A	From G to A										CjCas9 NNNVRYM on 19						SpCas9-NRCH NRCH on 22				enAsCas12a comp. VTTV on 23	FnCas12a comp. TTV on 24
rs72653744	ABCC6	368	pathogenic	Pseudoxanthoma elasticum (PXE)	TGAAAGCCAGAGGATCAGTTTCCCG<C>GACTGGTGGCTGACAGGTAGGAAGA	T	From C to T													SpCas9 (From Strep. past.) NNGTGA on 22
rs72653792	ABCC6	368	pathogenic		CCCCCTGGCGGCCCTGGATGCCCAC<G>TTGGCCAGCATGTCTTCAACCAGGT	A	From G to A						KKH SaCas9 comp. NNNRRT on 20				CjCas9 NNNVRYM on 19						SpCas9-NRCH NRCH on 22			enAsCas12a comp. TGTV on 25
rs72653752	ABCC6	368	pathogenic	Pseudoxanthoma elasticum (PXE)	TGCTTCCTGAGAACAGCAGGGGTCT<G>GGTACCCCCCATGTACCTCTGGGTC	C	From G to C			EQR SpCas9 comp. NGAG on 24	VQR SpCas9 comp. NGAN on 24																					xCas9 comp. NG on 24 SpCas9-NG comp. NG on 24
rs72653785	ABCC6	368	pathogenic	Pseudoxanthoma elasticum (PXE)	GACCCACCCTGGCTGGAGAGAGTAC<T>AGAAGCCTGTGCCCTGCAGCCAGAT	C	From T to C																								SpCas9-NRTH comp. NGGN on 24 SpCas9-NRCH comp. NGGN on 24	xCas9 comp. NG on 24 SpCas9-NG comp. NG on 24
rs61340537	ABCC6	368	pathogenic.likely-benign	Pseudoxanthoma elasticum (PXE)	CTACCTGCGTGCCGTGGGCACCCCC<C>TCTGCCTCTACGCACTCTTCCTCTT	A	From C to A						KKH SaCas9 comp. NNNRRT on 20				CjCas9 NNNVRYM on 21					SpCas9-NRRH comp. NRRH on 22											SpCas9-NRTH NRTH on 24
rs2856597	ABCC6	368	pathogenic	Pseudoxanthoma elasticum (PXE)	CCTGTATCCTCAGGTGCTTGGATTC<G>CCCTCATAGTCCTGTGTACCTCCAG	A	From G to A					SaCas9 comp. NNGRRT on 20	KKH SaCas9 comp. NNNRRT on 20							SpCas9 (From Strep. past.) comp. NNGTGA on 22
rs778544828	ABCC6	368	pathogenic	Pseudoxanthoma elasticum (PXE)	CCTGAGAACAGCAGGGGTCTGGGTA<C>CCCCCATGTACCTCTGGGTCCTTGG	T	From C to T				VQR SpCas9 comp. NGAN on 23											SpCas9-NRRH comp. NRRH on 22		AsCas12a RVR TATV on 23	AsCas12a RR TYCV on 25								SpCas9-NRTH NRTH on 23
rs879274205	ABCC6	368	likely-benign.pathogenic	Pseudoxanthoma elasticum (PXE)	TAAAAGGAAAGGCGGCAGTGGCATG<A>AGGCTCCAGAGACCGAGCCCTTCCT	G	From A to G	SpCas9 NGG on 23		EQR SpCas9 NGAG on 24	VQR SpCas9 NGAN on 24																				SpCas9-NRTH NGGN on 23 SpCas9-NRCH NGGN on 23	xCas9 NG on 24 SpCas9-NG NG on 24		St3Cas9 NGGNG on 23
rs768570780	ABCC6	368	likely-pathogenic		CAGCATGTCTTCAACCAGGTCATTG<G>GCCTGGTGGACTACTCCAGGGAACA	A	From G to A			EQR SpCas9 NGAG on 23	VQR SpCas9 NGAN on 23
rs63750473	ABCC6	368	pathogenic.likely-pathogenic	Pseudoxanthoma elasticum (PXE)	TCCCACATGGCTGAGACGTTCCAGG<G>CAGCACAGTGGTCCGGGCATTCCGA	C	From G to C	SpCas9 comp. NGG on 23									CjCas9 NNNVRYM on 20 CjCas9 comp. NNNVRYM on 21					SpCas9-NRRH NRRH on 22 SpCas9-NRRH comp. NRRH on 23	SpCas9-NRCH NRCH on 23 SpCas9-NRCH comp. NRCH on 24								SpCas9-NRRH comp. NGGN on 23 SpCas9-NRTH comp. NGGN on 23	xCas9 comp. NG on 24 SpCas9-NG comp. NG on 24
rs72653774	ABCC6	368	pathogenic	Pseudoxanthoma elasticum (PXE)	ACCCCCCAGGTCGCACTGGTGGTGT<T>TGCTGTCCACACTCTGGTGGCCGAG	C	From T to C				VQR SpCas9 comp. NGAN on 24															enAsCas12a TGTV on 22						xCas9 comp. NG on 24 SpCas9-NG comp. NG on 24
rs63750874	ABCC6	368	pathogenic		GTTTTACAGACTGGCCCAGGAGTCA<G>GCCTGGTCTGAGCCAGGACCCTCAA	T	From G to T												SpCas9-NG comp. NANG on 24
rs780887287	ABCC6	368	pathogenic	Pseudoxanthoma elasticum (PXE)	AGTGGGCTGCTGCGGCTCCAGGAGG<C>AGCTGAGGGTGGGATCTGGATCGAC	G	From C to G	SpCas9 NGG on 23		EQR SpCas9 NGAG on 24	VQR SpCas9 NGAN on 24											SpCas9-NRRH NRRH on 23			AsCas12a RR comp. TYCV on 24						SpCas9-NRRH NGGN on 23 SpCas9-NRTH NGGN on 23	xCas9 NG on 24 SpCas9-NG NG on 24		St3Cas9 NGGNG on 23
rs72653770	ABCC6	368	likely-pathogenic	Pseudoxanthoma elasticum (PXE)	GGCTCACCAGCTCTATCCTCAGGAA<C>TCGAAGACCATCAAGTTCCATGGCT	A	From C to A						KKH SaCas9 NNNRRT on 21 KKH SaCas9 comp. NNNRRT on 20	NmCas9 comp. NNNNGATT on 19	St1Cas9 NNRGAAW on 19		CjCas9 NNNVRYM on 21	LbCas12a & AsCas12a comp. TTTV on 25				SpCas9-NRRH NRRH on 23 SpCas9-NRRH comp. NRRH on 22											SpCas9-NRTH NRTH on 24 SpCas9-NRTH comp. NRTH on 23
rs772434460_0	ABCC6	368	pathogenic		AATCTGGTGTCCGTGGACGTGCAGC<G>GCTGACCGAGAGCGTCCTCTACCTC	C	From G to C	SpCas9 comp. NGG on 24	VRER SpCas9 comp. NGCG on 22								CjCas9 NNNVRYM on 19					SpCas9-NRRH comp. NRRH on 24	SpCas9-NRCH NRCH on 22								SpCas9-NRRH comp. NGGN on 24 SpCas9-NRTH comp. NGGN on 24 SpCas9-NRCH comp. NGGN on 24	xCas9 comp. NG on 24 SpCas9-NG comp. NG on 24
rs772434460_1	ABCC6	368	pathogenic	Pseudoxanthoma elasticum (PXE)	AATCTGGTGTCCGTGGACGTGCAGC<G>GCTGACCGAGAGCGTCCTCTACCTC	A	From G to A										CjCas9 NNNVRYM on 19						SpCas9-NRCH NRCH on 22
rs63750763	ABCC6	368	pathogenic		GCACTGTGCTGCTCATTGCCCACCG<C>CTGCGCTCCGTGATGGACTGTGCCC	G	From C to G	SpCas9 NGG on 23									CjCas9 comp. NNNVRYM on 20					SpCas9-NRRH NRRH on 23 SpCas9-NRRH comp. NRRH on 22	SpCas9-NRCH NRCH on 24 SpCas9-NRCH comp. NRCH on 23								SpCas9-NRRH NGGN on 23 SpCas9-NRTH NGGN on 23	xCas9 NG on 24 SpCas9-NG NG on 24
rs63749823	ABCC6	368	pathogenic	Pseudoxanthoma elasticum (PXE)	GCTGCGGCTCCAGGAGGCAGCTGAG<G>GTGGGATCTGGATCGACGGGGTCCC	A	From G to A			EQR SpCas9 NGAG on 23	VQR SpCas9 NGAN on 23											SpCas9-NRRH NRRH on 22
rs72653757	ABCC6	368	pathogenic.likely-benign	Pseudoxanthoma elasticum (PXE)	CTCCTCAGAAGAACTTGTTTCCCGG<C>TTGAAAAGGAGTGGATGAGGAACCG	T	From C to T						KKH SaCas9 NNNRRT on 20					LbCas12a & AsCas12a TTTV on 25				SpCas9-NRRH comp. NRRH on 22											SpCas9-NRTH NRTH on 23
rs72653789	ABCC6	368	pathogenic	Pseudoxanthoma elasticum (PXE)	AAGCAGCGGCTGAGCCTGGCCCGGG<C>TGTATACAGAAAGGCAGCTGTGTAC	A	From C to A				VQR SpCas9 NGAN on 23	SaCas9 NNGRRT on 21	KKH SaCas9 NNNRRT on 21				CjCas9 comp. NNNVRYM on 20		SpCas9-NG NANG on 24			SpCas9-NRRH NRRH on 23			AsCas12a RR comp. TYCV on 25								SpCas9-NRTH comp. NRTH on 23
rs72653768	ABCC6	368	pathogenic	Pseudoxanthoma elasticum (PXE)	GAGCAAATGAGGCAGAAGGACTCAC<G>GGCACGGCTCACCAGCTCTATCCTC	A	From G to A										CjCas9 NNNVRYM on 19						SpCas9-NRCH NRCH on 22			enAsCas12a comp. TGTV on 25
rs1462269230	ABCC6	368	pathogenic		CCCTGGCACGGAGCTGCAGATGCAG<G>CCATGCTCGGGAGCTGGTTTGCACA	T	From G to T				VQR SpCas9 comp. NGAN on 23		KKH SaCas9 NNNRRT on 20				CjCas9 NNNVRYM on 20					SpCas9-NRRH NRRH on 22 SpCas9-NRRH comp. NRRH on 23	SpCas9-NRCH comp. NRCH on 24		AsCas12a RR TYCV on 25								SpCas9-NRTH NRTH on 23
rs72653772	ABCC6	368	pathogenic	Pseudoxanthoma elasticum (PXE). Pseudoxanthoma elasticum (PXE). Pseudoxanthoma elasticum. forme fruste. Generalized arterial calcification of infancy 2 (GACI2)	TTTCTGGACAGAGTCCTGGGCATCC<G>AGGCCAGGAGCTGGGCGCCTTGCGG	A	From G to A																				enAsCas12a comp. VTTV on 23	FnCas12a comp. TTV on 24
rs72657691	ABCC6	368	pathogenic	Pseudoxanthoma elasticum (PXE)	TGCCAGCAAGTGGCCTCCTTCTGCC<G>GGGCTACTGGCTGAGCCTGTGGGCG	C	From G to C	SpCas9 comp. NGG on 24																							SpCas9-NRRH comp. NGGN on 24 SpCas9-NRTH comp. NGGN on 24 SpCas9-NRCH comp. NGGN on 24	xCas9 comp. NG on 24 SpCas9-NG comp. NG on 24
rs63750798	ABCC6	368	pathogenic		GCCTGCCCGGCCAGCTGCAGTACAA<G>TGTGCTGACCGAGGCGAGGACCTGA	T	From G to T						KKH SaCas9 NNNRRT on 20 KKH SaCas9 comp. NNNRRT on 21									SpCas9-NRRH NRRH on 22 SpCas9-NRRH comp. NRRH on 23					enAsCas12a VTTV on 24	FnCas12a TTV on 25					SpCas9-NRTH NRTH on 23 SpCas9-NRTH comp. NRTH on 24
rs63750457	ABCC6	368	pathogenic.likely-pathogenic	Pseudoxanthoma elasticum (PXE)	GAAAGCCAGAGGATCAGTTTCCCGC<G>ACTGGTGGCTGACAGGTAGGAAGAG	A	From G to A										CjCas9 NNNVRYM on 19						SpCas9-NRCH NRCH on 22				enAsCas12a comp. VTTV on 23	FnCas12a comp. TTV on 24
rs72653759	ABCC6	368	pathogenic		ATGTTCCTCTCAGCCTGCCTGCAAA<C>GCTGTTTGAGCAGCAGAACATGTAC	T	From C to T						KKH SaCas9 NNNRRT on 20				CjCas9 comp. NNNVRYM on 19						SpCas9-NRCH comp. NRCH on 22
rs72653788	ABCC6	368	pathogenic	Pseudoxanthoma elasticum (PXE)	GAATCTCTCCGGAGGCCAGAAGCAG<C>GGCTGAGCCTGGCCCGGGCTGTATA	T	From C to T						KKH SaCas9 NNNRRT on 20
rs63750146	ABCC6	368	likely-pathogenic	Pseudoxanthoma elasticum (PXE)	GTTCCAGGGCAGCACAGTGGTCCGG<G>CATTCCGAACCCAGGCCCCCTTTGT	A	From G to A				VQR SpCas9 NGAN on 23											SpCas9-NRRH NRRH on 22			AsCas12a RR comp. TYCV on 25	enAsCas12a comp. TGTV on 23							SpCas9-NRTH comp. NRTH on 23
rs72653762	ABCC6	368	conflicting-interpretations-of-pathogenicity.pathogenic.uncertain-significance	Pseudoxanthoma elasticum (PXE)	GTCGGCCATCACTGGCCTGGTGTAC<A>GAAAGGTGAGCCCTGGGGGACAAGG	G	From A to G										CjCas9 comp. NNNVRYM on 22		SpCas9-NG NANG on 22						AsCas12a RR comp. TYCV on 22 AsCas12a RR comp. TYCV on 23						SpCas9-NRTH NGGN on 24 SpCas9-NRCH NGGN on 24	xCas9 NG on 24 SpCas9-NG NG on 24
rs72653753	ABCC6	368	pathogenic	Pseudoxanthoma elasticum (PXE)	CTGATTCACACCGAGAGGAAAAAGG<G>AGTCCAGTCATCTGGAGTGCTGTTT	A	From G to A				VQR SpCas9 NGAN on 23											SpCas9-NRRH NRRH on 22					enAsCas12a comp. VTTV on 23	FnCas12a comp. TTV on 24		enAsCas12a comp. TTCN on 24 Cas12e (CasX) comp. TTCN on 24
rs63750402	ABCC6	368	pathogenic	Pseudoxanthoma elasticum (PXE)	AGAGAACAGCATCGTGTCAGTGGAG<C>GGATGCAGGACTATGCCTGGACGCC	T	From C to T					SaCas9 NNGRRT on 20	KKH SaCas9 NNNRRT on 20
rs281865557	ABCC6	368	pathogenic	Pseudoxanthoma elasticum (PXE)	AGGACTATGCCTGGACGCCCAAGGA<G>GTGATGGGCGGGAGGTGGGGAGGGG	T	From G to T					SaCas9 NNGRRT on 20	KKH SaCas9 NNNRRT on 20				CjCas9 comp. NNNVRYM on 21					SpCas9-NRRH NRRH on 22				enAsCas12a TGTV on 25							SpCas9-NRTH comp. NRTH on 24
rs947230593	ABCC6	368	pathogenic	Pseudoxanthoma elasticum (PXE)	AATTGTCCCAATCGTTCCCAGCGTG<G>GCCAGAAACAGCTCCTGTGTCTGGC	A	From G to A			EQR SpCas9 NGAG on 23	VQR SpCas9 NGAN on 23									SpCas9 (From Strep. past.) NNGTGA on 20
rs63750625	ABCC6	368	pathogenic	Pseudoxanthoma elasticum (PXE)	CGTGTCCTTCAAGATCCACGCAGGA<G>AGAAGGTGAGTGGTTCTCTCACAAT	A	From G to A								St1Cas9 NNRGAAW on 20			LbCas12a & AsCas12a comp. TTTV on 24				SpCas9-NRRH NRRH on 22			AsCas12a RR comp. TYCV on 25			FnCas12a comp. TTV on 25		enAsCas12a comp. TTCN on 25 Cas12e (CasX) comp. TTCN on 25
rs72664284	ABCC6	368	pathogenic.likely-benign	Pseudoxanthoma elasticum (PXE)	CAGGCTCAAGGTGCTGCAGATGAGG<T>TGCGGTCGGCCATCACTGGCCTGGT	C	From T to C																SpCas9-NRCH NRCH on 23									xCas9 comp. NG on 24 SpCas9-NG comp. NG on 24
rs1030872147	ABCC6	368	pathogenic	Pseudoxanthoma elasticum (PXE)	TGTGCTGCTCATTGCCCACCGCCTG<C>GCTCCGTGATGGACTGTGCCCGGTA	T	From C to T										CjCas9 comp. NNNVRYM on 19						SpCas9-NRCH comp. NRCH on 22			enAsCas12a TGTV on 23
rs1355752953	ABCC6	368	pathogenic	Pseudoxanthoma elasticum (PXE)	CTGGCAAATGGGGCCATCGCAGAGA<T>GGGTTCCTACCAGGAGCTTCTGCAG	C	From T to C																									xCas9 comp. NG on 24 SpCas9-NG comp. NG on 24
rs72657701	ABCC6	368	pathogenic	Pseudoxanthoma elasticum (PXE)	TGGAGCGGATGCAGGACTATGCCTG<G>ACGCCCAAGGAGGTGATGGGCGGGA	C	From G to C																SpCas9-NRCH NRCH on 23 SpCas9-NRCH comp. NRCH on 24									xCas9 comp. NG on 24 SpCas9-NG comp. NG on 24
rs63750410	ABCC6	368	pathogenic	Pseudoxanthoma elasticum (PXE)	GGTGGGCATCGTTGGCAGGACCGGG<G>CAGGGAAGTCCTCCCTGGCCAGTGG	C	From G to C	SpCas9 comp. NGG on 23									CjCas9 NNNVRYM on 20 CjCas9 comp. NNNVRYM on 21					SpCas9-NRRH NRRH on 22 SpCas9-NRRH comp. NRRH on 23	SpCas9-NRCH NRCH on 23 SpCas9-NRCH comp. NRCH on 24								SpCas9-NRRH comp. NGGN on 23 SpCas9-NRTH comp. NGGN on 23	xCas9 comp. NG on 24 SpCas9-NG comp. NG on 24
rs72653704	ABCC6	368	pathogenic	Pseudoxanthoma elasticum (PXE)	TGAAGGCCACAGTGCACCTGGCCTA<C>CTGCGTGCCGTGGGCACCCCCCTCT	G	From C to G															SpCas9-NRRH NRRH on 23 SpCas9-NRRH comp. NRRH on 22	SpCas9-NRCH NRCH on 24 SpCas9-NRCH comp. NRCH on 23									xCas9 NG on 24 SpCas9-NG NG on 24
rs63750209	ABCC6	368	pathogenic	Pseudoxanthoma elasticum (PXE)	ATCGAGTTCCGGGACTTTGGGCTAA<G>ATACCGACCTGAGCTCCCGCTGGCT	A	From G to A											LbCas12a & AsCas12a comp. TTTV on 25				SpCas9-NRRH NRRH on 22							enAsCas12a comp. TTTT on 24
rs63750759_0	ABCC6	368	pathogenic		GTCCTCCCTGGCCAGTGGGCTGCTG<C>GGCTCCAGGAGGCAGCTGAGGGTGG	A	From C to A			EQR SpCas9 NGAG on 23	VQR SpCas9 NGAN on 23								SpCas9-NG NANG on 24
rs63750759_1	ABCC6	368	pathogenic	Pseudoxanthoma elasticum (PXE). Generalized arterial calcification of infancy 2 (GACI2)	GTCCTCCCTGGCCAGTGGGCTGCTG<C>GGCTCCAGGAGGCAGCTGAGGGTGG	T	From C to T																			enAsCas12a TGTV on 23
rs72664288	ABCC6	368	pathogenic	Pseudoxanthoma elasticum (PXE)	CACCGCCCCTCCCCGCCAGGACCCC<A>TCCTGTTCCCTGGCTCTCTGCGGAT	C	From A to C	SpCas9 comp. NGG on 24		EQR SpCas9 comp. NGAG on 22																					SpCas9-NRRH comp. NGGN on 24 SpCas9-NRTH comp. NGGN on 24 SpCas9-NRCH comp. NGGN on 24	xCas9 comp. NG on 24 SpCas9-NG comp. NG on 24		St3Cas9 comp. NGGNG on 21 St3Cas9 comp. NGGNG on 24
rs63751112	ABCC6	368	pathogenic	Pseudoxanthoma elasticum (PXE)	ACTGCGCTCCAGGATCAGCATCATC<C>CCCAGGTGAGGCTGGTGGAGGGGGT	T	From C to T			EQR SpCas9 comp. NGAG on 23	VQR SpCas9 comp. NGAN on 23											SpCas9-NRRH comp. NRRH on 22			AsCas12a RR TYCV on 25
rs63749807	ABCC6	368	pathogenic	Pseudoxanthoma elasticum (PXE)	CTCCCACATGGCTGAGACGTTCCAG<G>GCAGCACAGTGGTCCGGGCATTCCG	T	From G to T						KKH SaCas9 NNNRRT on 20									SpCas9-NRRH NRRH on 22	SpCas9-NRCH comp. NRCH on 24
rs72653801	ABCC6	368	pathogenic		CTGGCCTACCTGCGTGCCGTGGGCA<C>CCCCCTCTGCCTCTACGCACTCTTC	A	From C to A					SaCas9 comp. NNGRRT on 20	KKH SaCas9 comp. NNNRRT on 20				CjCas9 NNNVRYM on 21					SpCas9-NRRH NRRH on 23 SpCas9-NRRH comp. NRRH on 22	SpCas9-NRCH NRCH on 24				enAsCas12a comp. VTTV on 24	FnCas12a comp. TTV on 25					SpCas9-NRTH comp. NRTH on 23
rs72653790	ABCC6	368	pathogenic	Pseudoxanthoma elasticum (PXE)	CAGAAAGGCAGCTGTGTACCTGCTG<G>ATGACCCCCTGGCGGCCCTGGATGC	A	From G to A				VQR SpCas9 NGAN on 23																enAsCas12a comp. VTTV on 23	FnCas12a comp. TTV on 24		enAsCas12a comp. TTCN on 24 Cas12e (CasX) comp. TTCN on 24
rs63751111	ABCC6	368	pathogenic		GCTCCAGGATCAGCATCATCCCCCA<G>GTGAGGCTGGTGGAGGGGGTGGGCA	A	From G to A																				enAsCas12a comp. VTTV on 24	FnCas12a comp. TTV on 25
rs72650697_0	ABCC6	368	pathogenic		AAAAGACCTCTGGTCGCTTGGGAGA<G>AAAACTCCTCAGAAGAACTTGTTTC	C	From G to C										CjCas9 NNNVRYM on 20					SpCas9-NRRH NRRH on 22	SpCas9-NRCH NRCH on 23			enAsCas12a comp. TGTV on 24						xCas9 comp. NG on 24 SpCas9-NG comp. NG on 24	SpCas9-NRTH comp. NRTH on 24
rs72650697_1	ABCC6	368	pathogenic	Pseudoxanthoma elasticum (PXE)	AAAAGACCTCTGGTCGCTTGGGAGA<G>AAAACTCCTCAGAAGAACTTGTTTC	T	From G to T						KKH SaCas9 NNNRRT on 20				CjCas9 NNNVRYM on 20					SpCas9-NRRH NRRH on 22		AsCas12a RVR comp. TATV on 24									SpCas9-NRTH NRTH on 23 SpCas9-NRTH comp. NRTH on 24
rs879956688_0	ABCC6	368	pathogenic	Pseudoxanthoma elasticum (PXE)	CTTCGCAGTGTTCCTGATTCACACC<G>AGAGGAAAAAGGGAGTCCAGTCATC	A	From G to A																				enAsCas12a comp. VTTV on 23	FnCas12a comp. TTV on 24
rs879956688_1	ABCC6	368	pathogenic	Pseudoxanthoma elasticum (PXE)	CTTCGCAGTGTTCCTGATTCACACC<G>AGAGGAAAAAGGGAGTCCAGTCATC	T	From G to T												SpCas9-NG comp. NANG on 24
rs72650700_0	ABCC6	368	pathogenic		CTTTCTGGACAGAGTCCTGGGCATC<C>GAGGCCAGGAGCTGGGCGCCTTGCG	A	From C to A															SpCas9-NRRH NRRH on 24
rs63749794	ABCC6	368	pathogenic	Pseudoxanthoma elasticum (PXE)	TGTGGTTAGCTCATGCCAGCTGAGA<C>GCTTGGAGTCAGCCAGCTACTCGTC	T	From C to T						KKH SaCas9 NNNRRT on 20				CjCas9 comp. NNNVRYM on 19						SpCas9-NRCH comp. NRCH on 22
rs67561842	ABCC6	368	pathogenic		CAGAAGCAGCGGCTGAGCCTGGCCC<G>GGCTGTATACAGAAAGGCAGCTGTG	T	From G to T												SpCas9-NG comp. NANG on 24
rs72653747	ABCC6	368	pathogenic	Pseudoxanthoma elasticum (PXE)	TGTCAGTGGAGCGGATGCAGGACTA<T>GCCTGGACGCCCAAGGAGGTGATGG	G	From T to G	SpCas9 NGG on 24									CjCas9 NNNVRYM on 22					SpCas9-NRRH NRRH on 24									SpCas9-NRRH NGGN on 24 SpCas9-NRTH NGGN on 24 SpCas9-NRCH NGGN on 24	xCas9 NG on 24 SpCas9-NG NG on 24
rs72653763	ABCC6	368	pathogenic		CCATCACTGGCCTGGTGTACAGAAA<G>GTGAGCCCTGGGGGACAAGGGCAGG	T	From G to T						KKH SaCas9 NNNRRT on 20									SpCas9-NRRH NRRH on 22				enAsCas12a TGTV on 25							SpCas9-NRTH comp. NRTH on 24
rs63750427	ABCC6	368	pathogenic	Pseudoxanthoma elasticum (PXE)	GTGGTTAGCTCATGCCAGCTGAGAC<G>CTTGGAGTCAGCCAGCTACTCGTCT	C	From G to C	SpCas9 comp. NGG on 23 SpCas9 comp. NGG on 24				SaCas9 comp. NNGRRT on 22	KKH SaCas9 comp. NNNRRT on 22				CjCas9 NNNVRYM on 19		SpCas9-NG comp. NANG on 22			SpCas9-NRRH comp. NRRH on 24	SpCas9-NRCH NRCH on 22								SpCas9-NRRH comp. NGGN on 23 SpCas9-NRTH comp. NGGN on 23 SpCas9-NRCH comp. NGGN on 23 SpCas9-NRRH comp. NGGN on 24 SpCas9-NRTH comp. NGGN on 24 SpCas9-NRCH comp. NGGN on 24	xCas9 comp. NG on 24 SpCas9-NG comp. NG on 24
rs368465318_0	ABCC6	368	pathogenic		ACGACCCTGCAGTAGGTGGGCAGCA<G>ACGCAGGCAGCCCTGCGTGGCGGGA	A	From G to A											LbCas12a & AsCas12a comp. TTTV on 24										FnCas12a comp. TTV on 25
rs368465318_1	ABCC6	368	pathogenic	Pseudoxanthoma elasticum (PXE)	ACGACCCTGCAGTAGGTGGGCAGCA<G>ACGCAGGCAGCCCTGCGTGGCGGGA	T	From G to T										CjCas9 NNNVRYM on 20		SpCas9-NG comp. NANG on 24					AsCas12a RVR comp. TATV on 24									SpCas9-NRTH NRTH on 23
rs72653767	ABCC6	368	pathogenic	Pseudoxanthoma elasticum (PXE)	GCCATCGCTGTCTTCCTGAGCCTCC<T>CCCTCTGAATTTCTTCATCTCCAAG	A	From T to A					SaCas9 comp. NNGRRT on 20	KKH SaCas9 comp. NNNRRT on 20				CjCas9 NNNVRYM on 21						SpCas9-NRCH NRCH on 24		AsCas12a RR TYCV on 22
rs63749998	ABCC6	368	pathogenic	Pseudoxanthoma elasticum (PXE)	AGCTACTCGTCTGTCTGCTCCCACA<T>GGCTGAGACGTTCCAGGGCAGCACA	C	From T to C																									xCas9 comp. NG on 24 SpCas9-NG comp. NG on 24
rs72653783	ABCC6	368	pathogenic	Pseudoxanthoma elasticum (PXE)	TAGGGTGCTGTGGCCTACGTGCCCC<A>GGAGGCCTGGGTGCAGAACACCTCT	C	From A to C	SpCas9 comp. NGG on 24																	AsCas12a RR comp. TYCV on 22						SpCas9-NRRH comp. NGGN on 24 SpCas9-NRTH comp. NGGN on 24 SpCas9-NRCH comp. NGGN on 24	xCas9 comp. NG on 24 SpCas9-NG comp. NG on 24		St3Cas9 comp. NGGNG on 24
rs72653780_0	ABCC6	368	pathogenic	Pseudoxanthoma elasticum (PXE)	CCAGGGCTGTCTGCTGGCTGTTGTC<G>GTCCAGTGGGGGCAGGGAAGTCCTC	T	From G to T															SpCas9-NRRH comp. NRRH on 24				enAsCas12a TGTV on 25
rs1357894483	ABCC6	368	pathogenic	Pseudoxanthoma elasticum (PXE)	AATGTGTGCTTCGGGCAGGAGCTGG<A>CCCACCCTGGCTGGAGAGAGTACTA	G	From A to G	SpCas9 NGG on 23															SpCas9-NRCH comp. NRCH on 23								SpCas9-NRTH NGGN on 23 SpCas9-NRCH NGGN on 23	xCas9 NG on 24 SpCas9-NG NG on 24
rs779408186	ABCC6	368	pathogenic	Pseudoxanthoma elasticum (PXE)	ATCAAGTTCCATGGCTGGGAGGGAG<C>CTTTCTGGACAGAGTCCTGGGCATC	G	From C to G	SpCas9 NGG on 23									CjCas9 comp. NNNVRYM on 20		SpCas9-NG NANG on 22			SpCas9-NRRH NRRH on 23 SpCas9-NRRH comp. NRRH on 22	SpCas9-NRCH NRCH on 24 SpCas9-NRCH comp. NRCH on 23								SpCas9-NRRH NGGN on 23 SpCas9-NRTH NGGN on 23	xCas9 NG on 24 SpCas9-NG NG on 24
rs747386965	ABCC6	368	pathogenic	Pseudoxanthoma elasticum (PXE)	CAGGTCCTGGCTCTGTCCAGCGGCT<C>CAGAAAGGCCAGTGCGGTGGGTGAT	T	From C to T				VQR SpCas9 comp. NGAN on 23																enAsCas12a VTTV on 23	FnCas12a TTV on 24		enAsCas12a TTCN on 24 Cas12e (CasX) TTCN on 24
rs2606921	ABCC6	368	pathogenic	Pseudoxanthoma elasticum (PXE)	AACGCTGCCCAGCAGGCCTCCGGAG<C>GGTAAGTCGGGGCGTGGGCCACCCT	T	From C to T					SaCas9 NNGRRT on 20	KKH SaCas9 NNNRRT on 20
rs63750608	ABCC6	368	pathogenic	Pseudoxanthoma elasticum (PXE)	GGGCTGCACACACTGCGCTCCAGGA<T>CAGCATCATCCCCCAGGTGAGGCTG	C	From T to C	SpCas9 comp. NGG on 23															SpCas9-NRCH NRCH on 23								SpCas9-NRTH comp. NGGN on 23 SpCas9-NRCH comp. NGGN on 23	xCas9 comp. NG on 24 SpCas9-NG comp. NG on 24
rs72653782	ABCC6	368	pathogenic	Pseudoxanthoma elasticum (PXE)	AAGTCCTCCCTGCTGTCCGCCCTCC<T>TGGGGAGCTGTCAAAGGTGGAGGGG	C	From T to C																		AsCas12a RR TYCV on 22						SpCas9-NRRH comp. NGGN on 24 SpCas9-NRTH comp. NGGN on 24 SpCas9-NRCH comp. NGGN on 24	xCas9 comp. NG on 24 SpCas9-NG comp. NG on 24
rs72657695	ABCC6	368	pathogenic	Pseudoxanthoma elasticum (PXE)	GTTGACGTGGACATTCCAGACAAAC<T>CCGGTCCCTGCTGATGTACGCCTTT	G	From T to G		VRER SpCas9 comp. NGCG on 23								CjCas9 NNNVRYM on 21		SpCas9-NG NANG on 22				SpCas9-NRCH NRCH on 24									xCas9 NG on 24 SpCas9-NG NG on 24
rs72653705	ABCC6	368	pathogenic	Pseudoxanthoma elasticum (PXE)	CCAGAGGCTCCTGTGGGATGTGGTG<C>GATCTCCCATCAGCTTCTTTGAGCG	T	From C to T													SpCas9 (From Strep. past.) NNGTGA on 22						enAsCas12a TGTV on 23
rs63751001	ABCC6	368	pathogenic	Pseudoxanthoma elasticum (PXE)	ACCCAGACACTGCAGTGGGTTGTTC<G>CAACTGGACAGACCTAGAGAACAGC	A	From G to A													SpCas9 (From Strep. past.) comp. NNGTGA on 22						enAsCas12a comp. TGTV on 23
rs797045213	ABCC8	6833	pathogenic.pathogenic-likely-pathogenic	Persistent hyperinsulinemic hypoglycemia of infancy (HHF1)	GGGATGCTGCTCCTCGTGGAGGTCA<A>TGTCATCAGGGTGAGGGTAAGCAGG	G	From A to G																SpCas9-NRCH comp. NRCH on 23									xCas9 NG on 24 SpCas9-NG NG on 24
rs1057516585	ABCC8	6833	likely-pathogenic	Persistent hyperinsulinemic hypoglycemia of infancy (HHF1)	CCATCGACTACTGGCTGGCCAAGTG<G>ACCGACAGCGCCCTGACCCTGACCC	A	From G to A				VQR SpCas9 NGAN on 23									SpCas9 (From Strep. past.) NNGTGA on 20							enAsCas12a comp. VTTV on 23	FnCas12a comp. TTV on 24		enAsCas12a comp. TTCN on 24 Cas12e (CasX) comp. TTCN on 24
rs193922396	ABCC8	6833	likely-pathogenic	Neonatal diabetes mellitus (NDM)	GAAGGAGATGACCAGCCTCAGGGCC<T>TTGCCATCTATACCTCCATCTCCAG	C	From T to C												SpCas9-NG comp. NANG on 22								enAsCas12a VTTV on 25				SpCas9-NRRH comp. NGGN on 24 SpCas9-NRTH comp. NGGN on 24 SpCas9-NRCH comp. NGGN on 24	xCas9 comp. NG on 24 SpCas9-NG comp. NG on 24
rs72559718	ABCC8	6833	pathogenic		GGCCGCACCGGCAGTGGGAAGTCCT<C>CTTCTCTCTTGCCTTCTTCCGCATG	T	From C to T				VQR SpCas9 comp. NGAN on 23											SpCas9-NRRH comp. NRRH on 22					enAsCas12a VTTV on 23	FnCas12a TTV on 24		enAsCas12a TTCN on 24 Cas12e (CasX) TTCN on 24
rs72559713	ABCC8	6833	likely-pathogenic	Persistent hyperinsulinemic hypoglycemia of infancy (HHF1)	GCCCAGCATCGAGTGCACACCATCC<T>GAGTGCAGACCTGGTGATCGTCCTG	C	From T to C																		AsCas12a RR TYCV on 22						SpCas9-NRRH comp. NGGN on 24 SpCas9-NRTH comp. NGGN on 24 SpCas9-NRCH comp. NGGN on 24	xCas9 comp. NG on 24 SpCas9-NG comp. NG on 24
rs193922399	ABCC8	6833	likely-pathogenic	Neonatal diabetes mellitus (NDM)	GTGTGCTACTTCATCCAGAAGTACT<T>CCGGGTGGCGTCCAGGTGATGGCCT	G	From T to G										CjCas9 comp. NNNVRYM on 20						SpCas9-NRCH NRCH on 24 SpCas9-NRCH comp. NRCH on 23									xCas9 NG on 24 SpCas9-NG NG on 24
rs587783171	ABCC8	6833	pathogenic		GAAGTCCTCCTTCTCTCTTGCCTTC<T>TCCGCATGGTGGACACGTTCGAAGG	G	From T to G										CjCas9 NNNVRYM on 21								AsCas12a RR TYCV on 22							xCas9 NG on 24 SpCas9-NG NG on 24	SpCas9-NRTH NRTH on 24
rs193922401	ABCC8	6833	likely-pathogenic	Neonatal diabetes mellitus (NDM)	TCTTTCCAGATCGGGATCTGCGGCC<G>CACCGGCAGTGGGAAGTCCTCCTTC	T	From G to T			EQR SpCas9 comp. NGAG on 23	VQR SpCas9 comp. NGAN on 23								SpCas9-NG comp. NANG on 24	SpCas9 (From Strep. past.) comp. NNGTGA on 20
rs193922405	ABCC8	6833	likely-pathogenic	Persistent hyperinsulinemic hypoglycemia of infancy (HHF1)	GAAGGCGGGGAGAATTTCAGCCAGG<G>ACAGAGGCAGCTGTTCTGCCTGGCC	A	From G to A				VQR SpCas9 NGAN on 23											SpCas9-NRRH NRRH on 22					enAsCas12a comp. VTTV on 23	FnCas12a comp. TTV on 24		enAsCas12a comp. TTCN on 24 Cas12e (CasX) comp. TTCN on 24
rs193929369	ABCC8	6833	pathogenic	Permanent neonatal diabetes mellitus (PNDM)	ATCCAGAAGTACTTCCGGGTGGCGT<C>CAGGTGATGGCCTCAGGGGTGAGGG	A	From C to A																SpCas9-NRCH NRCH on 24			enAsCas12a comp. TGTV on 23							SpCas9-NRTH comp. NRTH on 23
rs1057516439	ABCC8	6833	likely-pathogenic	Persistent hyperinsulinemic hypoglycemia of infancy (HHF1)	TCTTGCCCCTGGCCATCGTGTGCTA<C>TTCATCCAGAAGTACTTCCGGGTGG	G	From C to G						KKH SaCas9 NNNRRT on 21									SpCas9-NRRH NRRH on 23 SpCas9-NRRH comp. NRRH on 22	SpCas9-NRCH comp. NRCH on 23									xCas9 NG on 24 SpCas9-NG NG on 24	SpCas9-NRTH NRTH on 24
rs1057517139	ABCC8	6833	likely-pathogenic		AATCTGCTGTCCAAAGGCACCTACT<G>GTGGATGAACGCCTTCATCAAGACT	C	From G to C			EQR SpCas9 comp. NGAG on 24	VQR SpCas9 comp. NGAN on 24	SaCas9 comp. NNGRRT on 23							SpCas9-NG comp. NANG on 22													xCas9 comp. NG on 24 SpCas9-NG comp. NG on 24
rs763028380	ABCC8	6833	likely-pathogenic		CTCTTTCCAACAGACACAATTTCTC<G>GGGTTTACTTTGTCTCATCCCAAGA	C	From G to C	SpCas9 comp. NGG on 24														SpCas9-NRRH comp. NRRH on 24			AsCas12a RR TYCV on 23						SpCas9-NRRH comp. NGGN on 24 SpCas9-NRTH comp. NGGN on 24 SpCas9-NRCH comp. NGGN on 24	xCas9 comp. NG on 24 SpCas9-NG comp. NG on 24		St3Cas9 comp. NGGNG on 24
rs193929364	ABCC8	6833	pathogenic	Permanent neonatal diabetes mellitus (PNDM)	ATCGAGACTTCCAACTTCCCCAAGC<T>GCTAATTGGTAGGTGAGGTGTAGGA	C	From T to C		VRER SpCas9 comp. NGCG on 22								CjCas9 NNNVRYM on 19														SpCas9-NRTH comp. NGGN on 24 SpCas9-NRCH comp. NGGN on 24	xCas9 comp. NG on 24 SpCas9-NG comp. NG on 24
rs193929360	ABCC8	6833	pathogenic	Permanent neonatal diabetes mellitus (PNDM)	ACCTTCATGCTGCTCTTCGTCCTGG<T>GTGTGAGATTGCAGAGGGCATCCTG	G	From T to G	SpCas9 NGG on 23 SpCas9 NGG on 24				SaCas9 NNGRRT on 22	KKH SaCas9 NNNRRT on 22									SpCas9-NRRH NRRH on 24									SpCas9-NRRH NGGN on 23 SpCas9-NRTH NGGN on 23 SpCas9-NRCH NGGN on 23 SpCas9-NRRH NGGN on 24 SpCas9-NRTH NGGN on 24 SpCas9-NRCH NGGN on 24	xCas9 NG on 24 SpCas9-NG NG on 24		St3Cas9 NGGNG on 24
rs72559722	ABCC8	6833	pathogenic-likely-pathogenic.pathogenic	Persistent hyperinsulinemic hypoglycemia of infancy (HHF1). Permanent neonatal diabetes mellitus (PNDM). Transient neonatal diabetes mellitus 2 (TNDM2). Persistent hyperinsulinemic hypoglycemia of infancy (HHF1). Leucine-induced hypoglycemia (LIH). Diabetes mellitus type 2 (NIDDM)	CAACCTGTCTGGTGGTCAACGCCAG<C>GAATCAGTGTGGCCCGAGCCCTCTA	T	From C to T						KKH SaCas9 NNNRRT on 20							SpCas9 (From Strep. past.) NNGTGA on 22
rs193922408	ABCC8	6833	likely-pathogenic	Neonatal diabetes mellitus (NDM). Permanent neonatal diabetes mellitus (PNDM)	CCCCTCCTGCCCTGCCCAGCATCGA<G>TGCACACCATCCTGAGTGCAGACCT	A	From G to A															SpCas9-NRRH NRRH on 22			AsCas12a RR comp. TYCV on 25		enAsCas12a comp. VTTV on 24	FnCas12a comp. TTV on 25		enAsCas12a comp. TTCN on 25 Cas12e (CasX) comp. TTCN on 25			SpCas9-NRTH comp. NRTH on 23
rs193922397	ABCC8	6833	likely-pathogenic	Neonatal diabetes mellitus (NDM)	ACCAGCCTCAGGGCCTTTGCCATCT<A>TACCTCCATCTCCAGTGAGTTCACC	G	From A to G																SpCas9-NRCH comp. NRCH on 23			enAsCas12a TGTV on 24						xCas9 NG on 24 SpCas9-NG NG on 24
rs1048095	ABCC8	6833	pathogenic	Permanent neonatal diabetes mellitus (PNDM)	TTCCTGCAGCCCTTCGTGAATCTGC<T>GTCCAAAGGCACCTACTGGTGGATG	C	From T to C										CjCas9 NNNVRYM on 22		SpCas9-NG comp. NANG on 22												SpCas9-NRTH comp. NGGN on 24 SpCas9-NRCH comp. NGGN on 24	xCas9 comp. NG on 24 SpCas9-NG comp. NG on 24
rs72559734_0	ABCC8	6833	pathogenic		CTTCATTTCCCTGGGCACAACCTGC<G>GTGGATCCTGACCTTCATGCTGCTC	T	From G to T															SpCas9-NRRH comp. NRRH on 24	SpCas9-NRCH NRCH on 22			enAsCas12a TGTV on 25
rs72559734_1	ABCC8	6833	pathogenic	Familial hyperinsulinism. Permanent neonatal diabetes mellitus (PNDM). Transient neonatal diabetes mellitus 2 (TNDM2). Persistent hyperinsulinemic hypoglycemia of infancy (HHF1). Leucine-induced hypoglycemia (LIH). Diabetes mellitus type 2 (NIDDM)	CTTCATTTCCCTGGGCACAACCTGC<G>GTGGATCCTGACCTTCATGCTGCTC	A	From G to A																SpCas9-NRCH NRCH on 22
rs771075821_0	ABCC8	6833	pathogenic		GGGTGGACCAGGGGGTCCTCAACAA<C>GGCTGCTTTGTGGACGCGCTCAACG	A	From C to A											LbCas12a & AsCas12a comp. TTTV on 25	SpCas9-NG NANG on 24
rs771075821_1	ABCC8	6833	pathogenic		GGGTGGACCAGGGGGTCCTCAACAA<C>GGCTGCTTTGTGGACGCGCTCAACG	T	From C to T						KKH SaCas9 NNNRRT on 20
rs193922407	ABCC8	6833	likely-pathogenic	Neonatal diabetes mellitus (NDM)	TTGGCAGGAAAACATCCTCCAAAAG<G>TGGTGATGACAGCCTTCGCAGACCG	A	From G to A				VQR SpCas9 NGAN on 23											SpCas9-NRRH NRRH on 22											SpCas9-NRTH comp. NRTH on 23
rs80356653	ABCC8	6833	pathogenic	Permanent neonatal diabetes mellitus (PNDM)	CACCCTGCGCTCACGCCTCTCCATC<A>TCCTGCAGGACCCCGTCCTCTTCAG	G	From A to G																									xCas9 NG on 24 SpCas9-NG NG on 24
rs193922406	ABCC8	6833	likely-pathogenic	Neonatal diabetes mellitus (NDM)	GTTGCCCCCACTTGGCAGGAAAACA<T>CCTCCAAAAGGTGGTGATGACAGCC	G	From T to G										CjCas9 NNNVRYM on 21					SpCas9-NRRH NRRH on 23	SpCas9-NRCH NRCH on 24 SpCas9-NRCH comp. NRCH on 23									xCas9 NG on 24 SpCas9-NG NG on 24
rs570388861_0	ABCC8	6833	pathogenic.likely-pathogenic		TGAGCACTGGAAGACCCTCATGAAC<C>GACAGGACCAAGAGCTGGAGAAGGT	G	From C to G	SpCas9 NGG on 24											SpCas9-NG NANG on 22			SpCas9-NRRH NRRH on 24			AsCas12a RR comp. TYCV on 23						SpCas9-NRRH NGGN on 24 SpCas9-NRTH NGGN on 24 SpCas9-NRCH NGGN on 24	xCas9 NG on 24 SpCas9-NG NG on 24
rs137852674	ABCC8	6833	pathogenic	Transient neonatal diabetes mellitus 2 (TNDM2). Diabetes mellitus type 2 (NIDDM)	CTCCGTGGCCTTTGCCTCCCTCTCC<C>TCTTCCATATCTTGGTCACACCGCT	G	From C to G										CjCas9 NNNVRYM on 21					SpCas9-NRRH comp. NRRH on 22										xCas9 NG on 24 SpCas9-NG NG on 24	SpCas9-NRTH NRTH on 24
rs72559723	ABCC8	6833	pathogenic.not-provided		CTGACTATGATCGTGGGGCAGGTGG<G>CTGCGGCAAGTCCTCGCTCCTTCTA	A	From G to A				VQR SpCas9 NGAN on 23		KKH SaCas9 comp. NNNRRT on 20									SpCas9-NRRH NRRH on 22			AsCas12a RR comp. TYCV on 25								SpCas9-NRTH comp. NRTH on 23
rs80356637_0	ABCC8	6833	pathogenic.not-provided	Permanent neonatal diabetes mellitus (PNDM). Neonatal diabetes mellitus (NDM)	CTATCACAACATCGAGACTTCCAAC<T>TCCCCAAGCTGCTAATTGGTAGGTG	G	From T to G										CjCas9 NNNVRYM on 21		SpCas9-NG NANG on 22													xCas9 NG on 24 SpCas9-NG NG on 24	SpCas9-NRTH NRTH on 24
rs80356637_1	ABCC8	6833	pathogenic.not-provided	Diabetes mellitus. permanent neonatal. with neurologic features. Permanent neonatal diabetes mellitus (PNDM)	CTATCACAACATCGAGACTTCCAAC<T>TCCCCAAGCTGCTAATTGGTAGGTG	C	From T to C			EQR SpCas9 comp. NGAG on 22							CjCas9 NNNVRYM on 19														SpCas9-NRTH comp. NGGN on 24 SpCas9-NRCH comp. NGGN on 24	xCas9 comp. NG on 24 SpCas9-NG comp. NG on 24		St3Cas9 comp. NGGNG on 21
rs193922403_0	ABCC8	6833	likely-pathogenic	Neonatal diabetes mellitus (NDM)	GCACACTGTGGGAGGCCCTGGAAAT<C>GCCCAGCTGAAGCTGGTGGTGAAGG	G	From C to G	SpCas9 NGG on 24									CjCas9 comp. NNNVRYM on 19		SpCas9-NG NANG on 22			SpCas9-NRRH NRRH on 24	SpCas9-NRCH comp. NRCH on 22								SpCas9-NRRH NGGN on 24 SpCas9-NRTH NGGN on 24 SpCas9-NRCH NGGN on 24	xCas9 NG on 24 SpCas9-NG NG on 24
rs193922403_1	ABCC8	6833	likely-pathogenic		GCACACTGTGGGAGGCCCTGGAAAT<C>GCCCAGCTGAAGCTGGTGGTGAAGG	T	From C to T										CjCas9 comp. NNNVRYM on 19						SpCas9-NRCH comp. NRCH on 22				enAsCas12a VTTV on 23	FnCas12a TTV on 24
rs80356651	ABCC8	6833	pathogenic	Permanent neonatal diabetes mellitus (PNDM)	GCAAGCATCCTACTATGTGGCCATT<G>AAACTGGAATTAACTTGAGAGGAGC	A	From G to A									TdCas9 NAAAAC on 24		LbCas12a & AsCas12a comp. TTTV on 23										FnCas12a comp. TTV on 24	enAsCas12a comp. TTTT on 22
rs1411638309	ABCC8	6833	likely-pathogenic		CGCCCCCTCCTGCCCTGCCCAGCAT<C>GAGTGCACACCATCCTGAGTGCAGA	G	From C to G	SpCas9 NGG on 24											SpCas9-NG NANG on 22			SpCas9-NRRH NRRH on 24			AsCas12a RR comp. TYCV on 23						SpCas9-NRRH NGGN on 24 SpCas9-NRTH NGGN on 24 SpCas9-NRCH NGGN on 24	xCas9 NG on 24 SpCas9-NG NG on 24		St3Cas9 NGGNG on 24
rs797045208	ABCC8	6833	likely-pathogenic	Persistent hyperinsulinemic hypoglycemia of infancy (HHF1)	AACCTGCGGTGGATCCTGACCTTCA<T>GCTGCTCTTCGTCCTGGTGTGTGAG	G	From T to G	SpCas9 NGG on 24														SpCas9-NRRH NRRH on 24									SpCas9-NRRH NGGN on 24 SpCas9-NRTH NGGN on 24 SpCas9-NRCH NGGN on 24	xCas9 NG on 24 SpCas9-NG NG on 24
rs137852672	ABCC8	6833	pathogenic	Persistent hyperinsulinemic hypoglycemia of infancy (HHF1)	TATGGGATGCTGCTCCTCGTGGAGG<T>CAATGTCATCAGGGTGAGGGTAAGC	A	From T to A				VQR SpCas9 NGAN on 23						CjCas9 NNNVRYM on 21					SpCas9-NRRH NRRH on 23	SpCas9-NRCH NRCH on 24			enAsCas12a comp. TGTV on 23							SpCas9-NRTH comp. NRTH on 23
rs387906407	ABCC8	6833	pathogenic		CCCGTCCTCTTCAGCGGCACCATCC<G>GTGAGCCCCACCACCCCTCAGGCCC	C	From G to C	SpCas9 comp. NGG on 24											SpCas9-NG comp. NANG on 22												SpCas9-NRRH comp. NGGN on 24 SpCas9-NRTH comp. NGGN on 24 SpCas9-NRCH comp. NGGN on 24	xCas9 comp. NG on 24 SpCas9-NG comp. NG on 24
rs267606623	ABCC8	6833	pathogenic	Permanent neonatal diabetes mellitus (PNDM)	GTCTTCCTACTCTTCATCACCTTCC<C>CATCCTCTTCATTGGTGAGTGCGCG	T	From C to T			EQR SpCas9 comp. NGAG on 23	VQR SpCas9 comp. NGAN on 23
rs193922400	ABCC8	6833	pathogenic.likely-pathogenic		TGCTACTTCATCCAGAAGTACTTCC<G>GGTGGCGTCCAGGTGATGGCCTCAG	T	From G to T												SpCas9-NG comp. NANG on 24
rs1344172059	ABCC8	6833	likely-pathogenic	Atrial septal defect (ASD). Short stature. Feeding difficulties. Hypoglycemia. Growth delay. Congestive heart failure. Macrotia. Macrocephalus. Small for gestational age. Cardiac shunt. Gastroesophageal reflux. Neonatal respiratory distress	CTGTTCCTGCTGTCCAGTGTGGTCC<G>ATCTACCGTCAAAGCTCTAGTGAGG	A	From G to A							NmCas9 comp. NNNNGATT on 18													enAsCas12a comp. VTTV on 23	FnCas12a comp. TTV on 24
rs751279984	ABCC8	6833	likely-pathogenic	Persistent hyperinsulinemic hypoglycemia of infancy (HHF1)	CTTCCGCACGCGGGTGGAGACGACC<C>GCAGGAAGGAGATGACCAGCCTCAG	T	From C to T																SpCas9-NRCH comp. NRCH on 22
rs80356642	ABCC8	6833	pathogenic	Permanent neonatal diabetes mellitus (PNDM)	AAGCCTCCCGAGGACCTGCAAGACC<T>GGGGGTACGCTTCCTGCAGCCCTTC	G	From T to G	SpCas9 NGG on 24																							SpCas9-NRRH NGGN on 24 SpCas9-NRTH NGGN on 24 SpCas9-NRCH NGGN on 24	xCas9 NG on 24 SpCas9-NG NG on 24		St3Cas9 NGGNG on 24
rs797045206	ABCC8	6833	likely-pathogenic	Persistent hyperinsulinemic hypoglycemia of infancy (HHF1)	CTCCGCGGCATCAAGCTGCTGAAGC<T>GTACGCCTGGGAGAACATCTTCCGC	C	From T to C										CjCas9 NNNVRYM on 19 CjCas9 NNNVRYM on 22		SpCas9-NG comp. NANG on 22												SpCas9-NRTH comp. NGGN on 24 SpCas9-NRCH comp. NGGN on 24	xCas9 comp. NG on 24 SpCas9-NG comp. NG on 24
rs746480424	ABCC8	6833	likely-pathogenic		CAGAGGCAGCTGTTCTGCCTGGCCC<G>GGCCTTCGTGAGGAAGACCAGCATC	T	From G to T												SpCas9-NG comp. NANG on 24
rs1446306735	ABCC8	6833	uncertain-significance.likely-pathogenic	Persistent hyperinsulinemic hypoglycemia of infancy (HHF1)	GCCAAACTGCCGCTGCACACCCTGC<G>CTCACGCCTCTCCATCATCCTGCAG	A	From G to A					SaCas9 comp. NNGRRT on 20	KKH SaCas9 comp. NNNRRT on 20										SpCas9-NRCH NRCH on 22
rs886039877	ABCC8	6833	likely-pathogenic	Persistent hyperinsulinemic hypoglycemia of infancy (HHF1)	TCGGGATCTGCGGCCGCACCGGCAG<T>GGGAAGTCCTCCTTCTCTCTTGCCT	G	From T to G	SpCas9 NGG on 23 SpCas9 NGG on 24											SpCas9-NG NANG on 22												SpCas9-NRRH NGGN on 23 SpCas9-NRTH NGGN on 23 SpCas9-NRCH NGGN on 23 SpCas9-NRRH NGGN on 24 SpCas9-NRTH NGGN on 24 SpCas9-NRCH NGGN on 24	xCas9 NG on 24 SpCas9-NG NG on 24		St3Cas9 NGGNG on 23 St3Cas9 NGGNG on 24
rs193929366	ABCC8	6833	pathogenic	Permanent neonatal diabetes mellitus (PNDM)	GGAGGTGAAGCCTCCCGAGGACCTG<C>AAGACCTGGGGGTACGCTTCCTGCA	A	From C to A				VQR SpCas9 NGAN on 23							LbCas12a & AsCas12a comp. TTTV on 23				SpCas9-NRRH NRRH on 23 SpCas9-NRRH NRRH on 24			AsCas12a RR comp. TYCV on 24			FnCas12a comp. TTV on 24		enAsCas12a comp. TTCN on 24 Cas12e (CasX) comp. TTCN on 24
rs80356640	ABCC8	6833	pathogenic		CGAGGGAGGTGAAGCCTCCCGAGGA<C>CTGCAAGACCTGGGGGTACGCTTCC	T	From C to T				VQR SpCas9 comp. NGAN on 23	SaCas9 NNGRRT on 20	KKH SaCas9 NNNRRT on 20									SpCas9-NRRH comp. NRRH on 22											SpCas9-NRTH NRTH on 23
rs863225280	ABCC8	6833	pathogenic	Familial hyperinsulinism	CCCTTCGTGAATCTGCTGTCCAAAG<G>CACCTACTGGTGGATGAACGCCTTC	A	From G to A				VQR SpCas9 NGAN on 23											SpCas9-NRRH NRRH on 22				enAsCas12a comp. TGTV on 23							SpCas9-NRTH comp. NRTH on 23
rs200670692	ABCC8	6833	pathogenic.likely-pathogenic	Familial hyperinsulinism. Persistent hyperinsulinemic hypoglycemia of infancy (HHF1)	GCCGCCTACCGGGTGGACCAGGGGG<T>CCTCAACAACGGCTGCTTTGTGGAC	A	From T to A				VQR SpCas9 NGAN on 23		KKH SaCas9 comp. NNNRRT on 20				CjCas9 NNNVRYM on 21 CjCas9 comp. NNNVRYM on 20					SpCas9-NRRH NRRH on 23	SpCas9-NRCH NRCH on 24		AsCas12a RR comp. TYCV on 25								SpCas9-NRTH comp. NRTH on 23
rs28936370	ABCC8	6833	pathogenic	Persistent hyperinsulinemic hypoglycemia of infancy (HHF1)	ATCCAGATCCAGAACCTGAGCGTGC<G>CTACGACAGCTCCCTGAAGCCGGTG	C	From G to C	SpCas9 comp. NGG on 23 SpCas9 comp. NGG on 24											SpCas9-NG comp. NANG on 22			SpCas9-NRRH comp. NRRH on 24	SpCas9-NRCH NRCH on 22								SpCas9-NRRH comp. NGGN on 23 SpCas9-NRTH comp. NGGN on 23 SpCas9-NRCH comp. NGGN on 23 SpCas9-NRRH comp. NGGN on 24 SpCas9-NRTH comp. NGGN on 24 SpCas9-NRCH comp. NGGN on 24	xCas9 comp. NG on 24 SpCas9-NG comp. NG on 24
rs372307320	ABCC8	6833	likely-pathogenic	Persistent hyperinsulinemic hypoglycemia of infancy (HHF1)	CAATGAGCGGCTGAAGCAGACCAAC<G>AGATGCTCCGCGGCATCAAGCTGCT	A	From G to A										CjCas9 NNNVRYM on 19						SpCas9-NRCH NRCH on 22				enAsCas12a comp. VTTV on 23	FnCas12a comp. TTV on 24
rs80356634	ABCC8	6833	pathogenic	Permanent neonatal diabetes mellitus (PNDM)	ACATGGCTTCATTTCCCTGGGCACA<A>CCTGCGGTGGATCCTGACCTTCATG	G	From A to G																SpCas9-NRCH comp. NRCH on 23									xCas9 NG on 24 SpCas9-NG NG on 24
rs137852676_0	ABCC8	6833	likely-pathogenic.pathogenic		CTTCCGCATGGTGGACACGTTCGAA<G>GTGAGTTGTAAGGCGGGCACCCCAC	T	From G to T					SaCas9 NNGRRT on 20	KKH SaCas9 NNNRRT on 20									SpCas9-NRRH NRRH on 22				enAsCas12a TGTV on 25							SpCas9-NRTH comp. NRTH on 24
rs137852676_1	ABCC8	6833	likely-pathogenic.pathogenic	Permanent neonatal diabetes mellitus (PNDM). Familial hyperinsulinism. Persistent hyperinsulinemic hypoglycemia of infancy (HHF1)	CTTCCGCATGGTGGACACGTTCGAA<G>GTGAGTTGTAAGGCGGGCACCCCAC	A	From G to A											LbCas12a & AsCas12a comp. TTTV on 25				SpCas9-NRRH NRRH on 22
rs765090096	ABCC8	6833	likely-pathogenic		GCGGCATCAAGCTGCTGAAGCTGTA<C>GCCTGGGAGAACATCTTCCGCACGC	T	From C to T										CjCas9 comp. NNNVRYM on 19						SpCas9-NRCH comp. NRCH on 22	AsCas12a RVR TATV on 23
rs201682634	ABCC8	6833	likely-pathogenic	Persistent hyperinsulinemic hypoglycemia of infancy (HHF1)	GCTTCATTTCCCTGGGCACAACCTG<C>GGTGGATCCTGACCTTCATGCTGCT	T	From C to T																			enAsCas12a TGTV on 23
rs137852673_0	ABCC8	6833	likely-pathogenic.pathogenic.uncertain-significance	Transient neonatal diabetes mellitus 2 (TNDM2). Diabetes mellitus type 2 (NIDDM). Permanent neonatal diabetes mellitus (PNDM)	CTCTTTCCAGATCGGGATCTGCGGC<C>GCACCGGCAGTGGGAAGTCCTCCTT	T	From C to T																SpCas9-NRCH comp. NRCH on 22
rs137852673_1	ABCC8	6833	likely-pathogenic.pathogenic.uncertain-significance	Neonatal diabetes mellitus (NDM). Persistent hyperinsulinemic hypoglycemia of infancy (HHF1)	CTCTTTCCAGATCGGGATCTGCGGC<C>GCACCGGCAGTGGGAAGTCCTCCTT	A	From C to A															SpCas9-NRRH NRRH on 24	SpCas9-NRCH comp. NRCH on 22
rs769279368	ABCC8	6833	uncertain-significance.likely-pathogenic		TCCTCCTTCTCTCTTGCCTTCTTCC<G>CATGGTGGACACGTTCGAAGGTGAG	T	From G to T			EQR SpCas9 comp. NGAG on 23	VQR SpCas9 comp. NGAN on 23								SpCas9-NG comp. NANG on 24
rs769518471	ABCC8	6833	uncertain-significance.pathogenic	Persistent hyperinsulinemic hypoglycemia of infancy (HHF1). Monogenic diabetes	GCACCAGCGTGCTGAGATCCCATGG<C>GAGCCTGCGCCAAGTACCTGTCCTC	T	From C to T						KKH SaCas9 NNNRRT on 20							SpCas9 (From Strep. past.) NNGTGA on 22
rs1057516404	ABCC8	6833	likely-pathogenic	Persistent hyperinsulinemic hypoglycemia of infancy (HHF1)	GGAAGTGCTCAGATAGCACACTGTG<G>GAGGCCCTGGAAATCGCCCAGCTGA	A	From G to A			EQR SpCas9 NGAG on 23	VQR SpCas9 NGAN on 23									SpCas9 (From Strep. past.) NNGTGA on 20
rs137852671	ABCC8	6833	pathogenic	Persistent hyperinsulinemic hypoglycemia of infancy (HHF1)	GAAGACCAGCATCTTCATCATGGAC<G>AGGCCACGGCTTCCATTGACATGGC	A	From G to A										CjCas9 NNNVRYM on 19						SpCas9-NRCH NRCH on 22			enAsCas12a comp. TGTV on 25	enAsCas12a comp. VTTV on 23	FnCas12a comp. TTV on 24
rs1057516044	ABCC9	10060	likely-pathogenic	Hypertrichotic osteochondrodysplasia	ATATGGCTTGCAATGTACAGAGCTT<T>TGGGCGACCAATTCTACTTAGTAGC	C	From T to C				VQR SpCas9 comp. NGAN on 24																enAsCas12a VTTV on 22	FnCas12a TTV on 23		enAsCas12a TTCN on 23 Cas12e (CasX) TTCN on 23		xCas9 comp. NG on 24 SpCas9-NG comp. NG on 24
rs387907210	ABCC9	10060	pathogenic	Hypertrichotic osteochondrodysplasia	TATGTGGCTGGCTTTAGCATACTCT<G>TGGAGCAGGCATTTTCCTTTGCCTT	A	From G to A																	AsCas12a RVR TATV on 24									SpCas9-NRTH comp. NRTH on 23
rs760889253_0	ABCC9	10060	likely-pathogenic		CCTGGACAGCTATGAGCAATCAACA<C>GGCGTCTACGTCCCGCAGAAACAGA	A	From C to A												SpCas9-NG NANG on 24								enAsCas12a comp. VTTV on 24	FnCas12a comp. TTV on 25
rs387907211	ABCC9	10060	pathogenic	Hypertrichotic osteochondrodysplasia	CAGTACTTTATTGCTACAAAGTTGG<C>AGAGGCTCAGAAAAGTACACTTGTA	T	From C to T						KKH SaCas9 NNNRRT on 20																				SpCas9-NRTH NRTH on 23
rs1064794780	ABCC9	10060	likely-pathogenic		TTTCTCTCAGCTGCCAACAGATGGC<T>GGAGGTCAGGACGGTACGTTCATTT	G	From T to G	SpCas9 NGG on 24	VRER SpCas9 NGCG on 22																						SpCas9-NRRH NGGN on 24 SpCas9-NRTH NGGN on 24 SpCas9-NRCH NGGN on 24	xCas9 NG on 24 SpCas9-NG NG on 24		St3Cas9 NGGNG on 21
rs1057521640	ABCC9	10060	likely-pathogenic		ACAGATGCCTGTTCTCTTCAGCCAG<A>TATTGACTTATTACCATTTGGAGAT	T	From A to T						KKH SaCas9 NNNRRT on 20									SpCas9-NRRH comp. NRRH on 23	SpCas9-NRCH comp. NRCH on 24				enAsCas12a VTTV on 24	FnCas12a TTV on 25					SpCas9-NRTH NRTH on 23
rs373890183_0	ABCC9	10060	likely-pathogenic		TACTTTAGAGAGGAAAACTCTCCGA<C>GGGCCATGTATTCAAGAGAAGCCAA	A	From C to A												SpCas9-NG NANG on 24						AsCas12a RR comp. TYCV on 25		enAsCas12a comp. VTTV on 24	FnCas12a comp. TTV on 25		enAsCas12a comp. TTCN on 25 Cas12e (CasX) comp. TTCN on 25
rs373890183_1	ABCC9	10060	likely-pathogenic		TACTTTAGAGAGGAAAACTCTCCGA<C>GGGCCATGTATTCAAGAGAAGCCAA	T	From C to T						KKH SaCas9 NNNRRT on 20
rs387907209	ABCC9	10060	pathogenic		TTTTATTTTATCCAGAAATACTTTC<G>GGTTGCCTCTAAGTAAGTAAAACAG	C	From G to C	SpCas9 comp. NGG on 24							St1Cas9 comp. NNRGAAW on 23							SpCas9-NRRH comp. NRRH on 24			AsCas12a RR TYCV on 23						SpCas9-NRRH comp. NGGN on 24 SpCas9-NRTH comp. NGGN on 24 SpCas9-NRCH comp. NGGN on 24	xCas9 comp. NG on 24 SpCas9-NG comp. NG on 24
rs387907227	ABCC9	10060	likely-pathogenic.pathogenic	Hypertrichotic osteochondrodysplasia	CCTCCAACCTTGGAATCTCTAACTC<G>CTCAACACTGCTCTGCCTGTCTGCC	A	From G to A					SaCas9 comp. NNGRRT on 20	KKH SaCas9 comp. NNNRRT on 20							SpCas9 (From Strep. past.) comp. NNGTGA on 22
rs1001916923	ABCC9	10060	likely-pathogenic		TCAAGTGCATTGGTCGGTGCAGCTG<T>CATTGTGCTCCTTGCGCCAATTCAG	C	From T to C	SpCas9 comp. NGG on 23															SpCas9-NRCH NRCH on 23								SpCas9-NRTH comp. NGGN on 23 SpCas9-NRCH comp. NGGN on 23	xCas9 comp. NG on 24 SpCas9-NG comp. NG on 24
rs387907230	ABCC9	10060	pathogenic	Hypertrichotic osteochondrodysplasia	CCAAAGCTCAAAAGTACAAATTCAC<C>ACAACACATGGCTTCATTTTCCGGG	T	From C to T																										SpCas9-NRTH comp. NRTH on 22
rs387907228	ABCC9	10060	pathogenic	Hypertrichotic osteochondrodysplasia	CCCTCCAACCTTGGAATCTCTAACT<C>GCTCAACACTGCTCTGCCTGTCTGC	T	From C to T										CjCas9 comp. NNNVRYM on 19						SpCas9-NRCH comp. NRCH on 22				enAsCas12a VTTV on 23	FnCas12a TTV on 24
rs193922683	ABCC9	10060	likely-pathogenic	Cardiomyopathy (CMYO)	CATTCACTTGAGTGATCATTTAATG<C>AGGAGGGGATTTTGAAATTCCTGCA	T	From C to T																			enAsCas12a TGTV on 23							SpCas9-NRTH NRTH on 23
rs786205475	ABCC9	10060	likely-pathogenic		TAGTACCCAGCTCCCTCTGCTCTGT<C>ACTTCTCAGAAACAGCAGAAGGACT	T	From C to T										CjCas9 comp. NNNVRYM on 19										enAsCas12a VTTV on 23	FnCas12a TTV on 24					SpCas9-NRTH comp. NRTH on 22
rs387907208	ABCC9	10060	pathogenic	Hypertrichotic osteochondrodysplasia. Dilated cardiomyopathy 1O (CMD1O)	CTTTTATTTTATCCAGAAATACTTT<C>GGGTTGCCTCTAAGTAAGTAAAACA	T	From C to T											LbCas12a & AsCas12a TTTV on 23										FnCas12a TTV on 24	enAsCas12a TTTT on 22
rs1064794779	ABCC9	10060	likely-pathogenic		AAACAACATTGCCTACTTATTTCTC<T>CAGCTGCCAACAGATGGCTGGAGGT	G	From T to G		VRER SpCas9 comp. NGCG on 23								CjCas9 NNNVRYM on 21						SpCas9-NRCH NRCH on 24									xCas9 NG on 24 SpCas9-NG NG on 24
rs387906805	ABCC9	10060	pathogenic	Atrial fibrillation. familial. 12 (ATFB12)	GGCCTCTTTTCCACTTTGGTGATGA<C>CAACAAGTAGACCATCATGATCTAT	T	From C to T				VQR SpCas9 comp. NGAN on 23		KKH SaCas9 NNNRRT on 20																				SpCas9-NRTH NRTH on 23
rs387907229	ABCC9	10060	pathogenic	Hypertrichotic osteochondrodysplasia	AGACTATTGGCTGGCCACATGGACA<T>CGGAGTACAGTATAAACAATACTGG	C	From T to C	SpCas9 comp. NGG on 23															SpCas9-NRCH NRCH on 23								SpCas9-NRTH comp. NGGN on 23 SpCas9-NRCH comp. NGGN on 23	xCas9 comp. NG on 24 SpCas9-NG comp. NG on 24		St3Cas9 comp. NGGNG on 23
rs1057521820	ABCC9	10060	likely-pathogenic		GGGCCTTTGTCCGCAAAAGCAGCAT<T>CTTATTATGGATGAGGCAACAGCTT	G	From T to G										CjCas9 comp. NNNVRYM on 20		SpCas9-NG NANG on 22				SpCas9-NRCH NRCH on 24 SpCas9-NRCH comp. NRCH on 23									xCas9 NG on 24 SpCas9-NG NG on 24
rs12298510_0	ABCC9	10060	likely-pathogenic		TACTTATTTCTCTCAGCTGCCAACA<G>ATGGCTGGAGGTCAGGACGGTACGT	C	From G to C										CjCas9 NNNVRYM on 20		SpCas9-NG comp. NANG on 22				SpCas9-NRCH NRCH on 23			enAsCas12a comp. TGTV on 24						xCas9 comp. NG on 24 SpCas9-NG comp. NG on 24
rs12298510_1	ABCC9	10060	likely-pathogenic	Hypertrichotic osteochondrodysplasia	TACTTATTTCTCTCAGCTGCCAACA<G>ATGGCTGGAGGTCAGGACGGTACGT	A	From G to A											LbCas12a & AsCas12a comp. TTTV on 24										FnCas12a comp. TTV on 25
rs121909304	ABCC9	10060	pathogenic	Dilated cardiomyopathy 1O (CMD1O)	GCATCGAGTACACACTATTCTGACG<G>CAGACCTGGTTATTGTGATGAAGCG	A	From G to A				VQR SpCas9 NGAN on 23															enAsCas12a comp. TGTV on 23							SpCas9-NRTH comp. NRTH on 23
rs398123113	ABCD1	215	likely-pathogenic		CTGACGGAGGACGTGGTGGCCTTTG<C>GGCCTCTGTGGCCCACCTCTACTCC	T	From C to T																			enAsCas12a TGTV on 23
rs4010613	ABCD1	215	pathogenic	Adrenoleukodystrophy (ALD)	CGAGAAGCAGAGAATCGGCATGGCC<C>GCATGTTCTACCACAGGTGAGCACT	T	From C to T																SpCas9-NRCH comp. NRCH on 22
rs398123110	ABCD1	215	pathogenic		GTCGGTGTATGTGGCCCGCCTGGAC<G>GAAGGCTGGCCCGCTGCATCGTCCG	A	From G to A										CjCas9 NNNVRYM on 19						SpCas9-NRCH NRCH on 22			enAsCas12a comp. TGTV on 25
rs11146842	ABCD1	215	pathogenic	Adrenoleukodystrophy (ALD)	GAGAAGCAGAGAATCGGCATGGCCC<G>CATGTTCTACCACAGGTGAGCACTC	A	From G to A																			enAsCas12a comp. TGTV on 23
rs782083931	ABCD1	215	uncertain-significance.likely-pathogenic	Adrenoleukodystrophy (ALD)	GGAGCTGGTGGCAGAGGAGGCGCGG<C>GGAAGGGGGAGCTGCGCTACATGCA	T	From C to T						KKH SaCas9 NNNRRT on 20
rs193922098	ABCD1	215	uncertain-significance.likely-pathogenic	Adrenoleukodystrophy (ALD). History of neurodevelopmental disorder	GGAGGCGCGGCGGAAGGGGGAGCTG<C>GCTACATGCACTCGCGTGTGGTGGC	T	From C to T										CjCas9 comp. NNNVRYM on 19						SpCas9-NRCH comp. NRCH on 22			enAsCas12a TGTV on 23
rs128624213	ABCD1	215	pathogenic	Adrenoleukodystrophy (ALD)	GCACTCGCGTGTGGTGGCCAACTCG<G>AGGAGATCGCCTTCTATGGGGGCCA	A	From G to A				VQR SpCas9 NGAN on 23																enAsCas12a comp. VTTV on 23	FnCas12a comp. TTV on 24		enAsCas12a comp. TTCN on 24 Cas12e (CasX) comp. TTCN on 24
rs398123111	ABCD1	215	pathogenic		GCGGGCTTTTGGCTGGCAGCTGCTG<C>AGTGGCTCCTCATCGCCCTCCCTGC	T	From C to T																			enAsCas12a TGTV on 23							SpCas9-NRTH NRTH on 23
rs797044726	ABCD1	215	pathogenic	Adrenoleukodystrophy (ALD)	GATGTTCCAGGTATTTGAAGATGTT<C>AGCGCTGTCACTTCAAGAGGCCCAG	T	From C to T											LbCas12a & AsCas12a TTTV on 23										FnCas12a TTV on 24
rs398123106	ABCD1	215	pathogenic.likely-pathogenic		CGTGCACCTGCACCACATCCTGCAG<C>GGGAGGGAGGTAGGAGGCCTGGGGC	T	From C to T						KKH SaCas9 NNNRRT on 20
rs128624222	ABCD1	215	pathogenic		GGATGTGGAACAGGGGATCATCTGC<G>AGAACATCCCCATCGTCACGCCCTC	A	From G to A																SpCas9-NRCH NRCH on 22				enAsCas12a comp. VTTV on 23	FnCas12a comp. TTV on 24
rs128624214	ABCD1	215	pathogenic	Adrenoleukodystrophy (ALD)	TGCGAGAACATCCCCATCGTCACGC<C>CTCAGGAGAGGTGGTGGTGGCCAGC	G	From C to G		VRER SpCas9 NGCG on 22 VRER SpCas9 comp. NGCG on 23													SpCas9-NRRH comp. NRRH on 22	SpCas9-NRCH NRCH on 24									xCas9 NG on 24 SpCas9-NG NG on 24
rs864309520	ABCD1	215	likely-pathogenic	Adrenoleukodystrophy (ALD)	CCCACCTCTACTCCAACCTGACCAA<G>CCACTCCTGGACGTGGCTGTGACTT	C	From G to C	SpCas9 comp. NGG on 23				SaCas9 comp. NNGRRT on 21	KKH SaCas9 comp. NNNRRT on 21				CjCas9 NNNVRYM on 20					SpCas9-NRRH NRRH on 22 SpCas9-NRRH comp. NRRH on 23	SpCas9-NRCH NRCH on 23								SpCas9-NRRH comp. NGGN on 23 SpCas9-NRTH comp. NGGN on 23	xCas9 comp. NG on 24 SpCas9-NG comp. NG on 24	SpCas9-NRTH comp. NRTH on 24
rs797044610	ABCD1	215	pathogenic-likely-pathogenic.likely-pathogenic	Adrenoleukodystrophy (ALD)	GCCAACTCGGAGGAGATCGCCTTCT<A>TGGGGGCCATGAGGTGGGGCAGGTT	G	From A to G																SpCas9-NRCH comp. NRCH on 23			enAsCas12a TGTV on 24						xCas9 NG on 24 SpCas9-NG NG on 24
rs782041940	ABCD1	215	uncertain-significance.likely-pathogenic		CGCCCTCCTGGATGAATGCACCAGC<G>CCGTGAGCATCGACGTGGAAGGCAA	T	From G to T			EQR SpCas9 comp. NGAG on 23	VQR SpCas9 comp. NGAN on 23											SpCas9-NRRH comp. NRRH on 24	SpCas9-NRCH NRCH on 22		AsCas12a RR TYCV on 25
rs128624223	ABCD1	215	pathogenic	Adrenoleukodystrophy (ALD)	GGCCCCAATGGCTGCGGCAAGAGCT<C>CCTGTTCCGGATCCTGGGTGGGCTC	T	From C to T				VQR SpCas9 comp. NGAN on 23											SpCas9-NRRH comp. NRRH on 22					enAsCas12a VTTV on 23	FnCas12a TTV on 24		enAsCas12a TTCN on 24 Cas12e (CasX) TTCN on 24
rs1057517954	ABCD1	215	likely-pathogenic	Adrenoleukodystrophy (ALD)	GAGGGCCAACTGGCCCTGTCGTTCC<G>CAGCCGTCTGGTGGCCCACGCCTAC	A	From G to A																			enAsCas12a comp. TGTV on 23
rs193922097	ABCD1	215	pathogenic	Adrenoleukodystrophy (ALD)	GCAGCTGCTGCAGTGGCTCCTCATC<G>CCCTCCCTGCTACCTTCGTCAACAG	A	From G to A					SaCas9 comp. NNGRRT on 20	KKH SaCas9 comp. NNNRRT on 20							SpCas9 (From Strep. past.) comp. NNGTGA on 22
rs1064793877	ABCD1	215	pathogenic		AAGTACGCCCTCCTGGATGAATGCA<C>CAGCGCCGTGAGCATCGACGTGGAA	T	From C to T				VQR SpCas9 comp. NGAN on 23																						SpCas9-NRTH NRTH on 23
rs1170974058	ABCD1	215	pathogenic		CTGTCCCTCTCCTGGCCAGGAAATA<C>CACACACACTTGCTACAGTTCGATG	T	From C to T				VQR SpCas9 comp. NGAN on 23									SpCas9 (From Strep. past.) comp. NNGTGA on 20				AsCas12a RVR TATV on 23									SpCas9-NRTH NRTH on 23
rs727503786_0	ABCD1	215	pathogenic.likely-pathogenic		GACAGCGGCTGCAGATGCCATTGAG<C>GGATCATGTCGTCGTACAAGGAGGT	A	From C to A			EQR SpCas9 NGAG on 23	VQR SpCas9 NGAN on 23								SpCas9-NG NANG on 24
rs727503786_1	ABCD1	215	pathogenic.likely-pathogenic		GACAGCGGCTGCAGATGCCATTGAG<C>GGATCATGTCGTCGTACAAGGAGGT	G	From C to G	SpCas9 NGG on 23 SpCas9 NGG on 24											SpCas9-NG NANG on 22												SpCas9-NRRH NGGN on 23 SpCas9-NRTH NGGN on 23 SpCas9-NRCH NGGN on 23 SpCas9-NRRH NGGN on 24 SpCas9-NRTH NGGN on 24 SpCas9-NRCH NGGN on 24	xCas9 NG on 24 SpCas9-NG NG on 24		St3Cas9 NGGNG on 23
rs128624216	ABCD1	215	pathogenic	Adrenoleukodystrophy (ALD)	ATCGCCCTCCCTGCTACCTTCGTCA<A>CAGTGCCATCCGTTACCTGGAGGGC	G	From A to G																SpCas9-NRCH comp. NRCH on 23									xCas9 NG on 24 SpCas9-NG NG on 24
rs201568579	ABCD1	215	pathogenic		CCCTACATGTCTGTGGGCTCCCTGC<G>TGACCAGGTGATCTACCCGGACTCA	A	From G to A																SpCas9-NRCH NRCH on 22
rs128624215	ABCD1	215	pathogenic	Adrenoleukodystrophy (ALD)	GCGCACAGAAGCCTTCACTATTGCC<C>GCAACCTCCTGACAGCGGCTGCAGA	T	From C to T																SpCas9-NRCH comp. NRCH on 22
rs782546330	ABCD1	215	likely-pathogenic	Adrenoleukodystrophy (ALD)	GCGAGAACATCCCCATCGTCACGCC<C>TCAGGAGAGGTGGTGGTGGCCAGCC	G	From C to G										CjCas9 NNNVRYM on 21					SpCas9-NRRH comp. NRRH on 22										xCas9 NG on 24 SpCas9-NG NG on 24	SpCas9-NRTH NRTH on 24
rs1131691954	ABCD1	215	likely-pathogenic	Adrenoleukodystrophy (ALD)	TGTGGTGGCCAACTCGGAGGAGATC<G>CCTTCTATGGGGGCCATGAGGTGGG	A	From G to A						KKH SaCas9 comp. NNNRRT on 20							SpCas9 (From Strep. past.) comp. NNGTGA on 22
rs886044777	ABCD1	215	pathogenic.likely-pathogenic	Adrenoleukodystrophy (ALD)	CGCACAGAAGCCTTCACTATTGCCC<G>CAACCTCCTGACAGCGGCTGCAGAT	A	From G to A																			enAsCas12a comp. TGTV on 23
rs128624225	ABCD1	215	pathogenic	Addison's disease. Adrenoleukodystrophy (ALD)	ATGTGTGACTGGAAGGACGTCCTGT<C>GGGTGGCGAGAAGCAGAGAATCGGC	T	From C to T																				enAsCas12a VTTV on 23	FnCas12a TTV on 24
rs128624217	ABCD1	215	pathogenic	Adrenoleukodystrophy (ALD)	TCTGGTGGCCCACGCCTACCGCCTC<T>ACTTCTCCCAGCAGACCTACTACCG	G	From T to G				VQR SpCas9 NGAN on 24											SpCas9-NRRH NRRH on 24										xCas9 NG on 24 SpCas9-NG NG on 24
rs398123103	ABCD1	215	likely-pathogenic		GGTGGGCTCTGGCCCACGTACGGTG<G>TGTGCTCTACAAGCCCCCACCCCAG	A	From G to A				VQR SpCas9 NGAN on 23									SpCas9 (From Strep. past.) NNGTGA on 20													SpCas9-NRTH comp. NRTH on 23
rs797044611	ABCD1	215	likely-pathogenic		GGCCAACTCGGAGGAGATCGCCTTC<T>ATGGGGGCCATGAGGTGGGGCAGGT	C	From T to C												SpCas9-NG comp. NANG on 22						AsCas12a RR TYCV on 22 AsCas12a RR TYCV on 23						SpCas9-NRTH comp. NGGN on 24 SpCas9-NRCH comp. NGGN on 24	xCas9 comp. NG on 24 SpCas9-NG comp. NG on 24
rs1131691916	ABCD1	215	likely-pathogenic.uncertain-significance	Adrenoleukodystrophy (ALD)	CTACCGGGTCAGCAACATGGACGGG<C>GGCTTCGCAACCCTGACCAGTCTCT	T	From C to T					SaCas9 NNGRRT on 20	KKH SaCas9 NNNRRT on 20
rs193922094	ABCD1	215	likely-pathogenic	Adrenoleukodystrophy (ALD)	CTCTGGCCCACGTACGGTGGTGTGC<T>CTACAAGCCCCCACCCCAGCGCATG	C	From T to C	SpCas9 comp. NGG on 23											SpCas9-NG comp. NANG on 22												SpCas9-NRRH comp. NGGN on 23 SpCas9-NRTH comp. NGGN on 23 SpCas9-NRCH comp. NGGN on 23 SpCas9-NRTH comp. NGGN on 24 SpCas9-NRCH comp. NGGN on 24	xCas9 comp. NG on 24 SpCas9-NG comp. NG on 24
rs128624219	ABCD1	215	pathogenic	Adrenoleukodystrophy (ALD)	ACAGCGGCTGCAGATGCCATTGAGC<G>GATCATGTCGTCGTACAAGGAGGTA	A	From G to A										CjCas9 NNNVRYM on 19						SpCas9-NRCH NRCH on 22
rs398123104	ABCD1	215	likely-pathogenic		GCCCTACATGTCTGTGGGCTCCCTG<C>GTGACCAGGTGATCTACCCGGACTC	T	From C to T										CjCas9 comp. NNNVRYM on 19						SpCas9-NRCH comp. NRCH on 22			enAsCas12a TGTV on 23 enAsCas12a TGTV on 25
rs201777056	ABCD4	5826	pathogenic.not-provided	METHYLMALONIC ACIDURIA AND HOMOCYSTINURIA. cblJ TYPE (MAHCJ)	GTCCAGAATGCCTTTGTGTGCATCT<A>CCTCATCAGCTGCTTCACCCAGCTC	G	From A to G																SpCas9-NRCH comp. NRCH on 23									xCas9 NG on 24 SpCas9-NG NG on 24
rs119479067	ABCG5	64240	pathogenic	Sitosterolemia (STSL)	GTGCTAAAGGGTGCTATCCAGGACC<G>CGTAGGTCTCCTTTACCAGTTTGTG	C	From G to C	SpCas9 comp. NGG on 23 SpCas9 comp. NGG on 24				SaCas9 comp. NNGRRT on 23																			SpCas9-NRRH comp. NGGN on 23 SpCas9-NRTH comp. NGGN on 23 SpCas9-NRCH comp. NGGN on 23 SpCas9-NRRH comp. NGGN on 24 SpCas9-NRTH comp. NGGN on 24 SpCas9-NRCH comp. NGGN on 24	xCas9 comp. NG on 24 SpCas9-NG comp. NG on 24		St3Cas9 comp. NGGNG on 23
rs760929179_0	ABCG5	64240	pathogenic		GCTGGGCTTACATCCTGAGGTTGCC<C>GATTTGGATATTTTTCTGCTGCTCT	G	From C to G	SpCas9 NGG on 24				SaCas9 NNGRRT on 23										SpCas9-NRRH NRRH on 24			AsCas12a RR comp. TYCV on 23						SpCas9-NRRH NGGN on 24 SpCas9-NRTH NGGN on 24 SpCas9-NRCH NGGN on 24	xCas9 NG on 24 SpCas9-NG NG on 24
rs119480069	ABCG5	64240	pathogenic	Sitosterolemia (STSL)	AGAAATAAGCTGGCAGTGATTACGC<G>TCTCCTTCAGAATCTGATCATGGGT	A	From G to A						KKH SaCas9 comp. NNNRRT on 20				CjCas9 NNNVRYM on 19						SpCas9-NRCH NRCH on 22
rs119480070	ABCG5	64240	pathogenic	Sitosterolemia (STSL)	CCTCAAAGATGTCTCCTTGTACGTG<G>AGAGCGGGCAGATCATGTGCATCCT	T	From G to T																SpCas9-NRCH comp. NRCH on 24			enAsCas12a TGTV on 23							SpCas9-NRTH NRTH on 23
rs137852987_0	ABCG8	64241	pathogenic	Sitosterolemia (STSL)	TGCGTGACTTAGATGACTTTCTATG<G>AAAGCAGAGACGAAGGATCTTGACG	A	From G to A				VQR SpCas9 NGAN on 23							LbCas12a & AsCas12a comp. TTTV on 23										FnCas12a comp. TTV on 24	enAsCas12a comp. TTTT on 22	enAsCas12a comp. TTCN on 24 Cas12e (CasX) comp. TTCN on 24
rs137852987_1	ABCG8	64241	pathogenic		TGCGTGACTTAGATGACTTTCTATG<G>AAAGCAGAGACGAAGGATCTTGACG	T	From G to T																SpCas9-NRCH comp. NRCH on 24			enAsCas12a TGTV on 23							SpCas9-NRTH NRTH on 23
rs544500542	ABCG8	64241	pathogenic		TCCTGCTGCACTTCCTGCTGGTGTG<G>CTGGTGGTCTTCTGTTGCAGGATTA	A	From G to A				VQR SpCas9 NGAN on 23		KKH SaCas9 comp. NNNRRT on 20							SpCas9 (From Strep. past.) NNGTGA on 20													SpCas9-NRTH comp. NRTH on 23
rs137854891	ABCG8	64241	pathogenic	Sitosterolemia (STSL)	CAGATGCTGGCCATCATAGGGAGCT<C>AGGTACCGGAAAGGCAAATCGCTGG	G	From C to G			EQR SpCas9 NGAG on 24	VQR SpCas9 NGAN on 24																					xCas9 NG on 24 SpCas9-NG NG on 24
rs137852989	ABCG8	64241	pathogenic.likely-pathogenic	Sitosterolemia (STSL)	TCAGCGGTGGCTTCATGGTCCTGTA<C>TACGTGTCCTTAAGGTTCATCAAAC	G	From C to G						KKH SaCas9 NNNRRT on 21				CjCas9 NNNVRYM on 21					SpCas9-NRRH NRRH on 23	SpCas9-NRCH comp. NRCH on 23									xCas9 NG on 24 SpCas9-NG NG on 24	SpCas9-NRTH NRTH on 24
rs137852992	ABCG8	64241	pathogenic	Sitosterolemia (STSL)	GCGTGGATTTCCAAAGTGTCCTTCC<T>GCGGTGGTGTTTTGAAGGGCTGATG	G	From T to G	SpCas9 NGG on 24														SpCas9-NRRH NRRH on 24			AsCas12a RR TYCV on 22						SpCas9-NRRH NGGN on 24 SpCas9-NRTH NGGN on 24 SpCas9-NRCH NGGN on 24	xCas9 NG on 24 SpCas9-NG NG on 24		St3Cas9 NGGNG on 24
rs137852993	ABCG8	64241	pathogenic	Sitosterolemia (STSL)	CATTGGGGTGCAGCTCCTGTGGAAC<C>CAGGTGAGGGCCTGGGGGGCAGATG	A	From C to A										CjCas9 NNNVRYM on 21						SpCas9-NRCH NRCH on 24			enAsCas12a comp. TGTV on 23
rs1000291485	ABCG8	64241	pathogenic		GTGACAACAGCCTGTACTTCACCTA<C>AGTGGCCAGCCCAACACCCTGGAGG	G	From C to G			EQR SpCas9 NGAG on 24	VQR SpCas9 NGAN on 24	SaCas9 NNGRRT on 23										SpCas9-NRRH NRRH on 23										xCas9 NG on 24 SpCas9-NG NG on 24
rs11887534	ABCG8	64241	benign.pathogenic.likely-benign	Gallbladder disease 4 (GBD4). Sitosterolemia (STSL)	GCTGCCGAAAGGGGCCACTCCCCAG<G>ATACCTCGGTGAGTGAGCAATGGGA	C	From G to C										CjCas9 NNNVRYM on 20		SpCas9-NG comp. NANG on 22			SpCas9-NRRH NRRH on 22	SpCas9-NRCH NRCH on 23 SpCas9-NRCH comp. NRCH on 24									xCas9 comp. NG on 24 SpCas9-NG comp. NG on 24
rs886039872	ABHD12	26090	likely-pathogenic	Polyneuropathy. hearing loss. ataxia. retinitis pigmentosa. and cataract (PHARC)	TACAGCGTGAAGCACATCTCCTGTC<C>CCTGCTCATCCTGCACGCTGAGGAC	T	From C to T			EQR SpCas9 comp. NGAG on 23	VQR SpCas9 comp. NGAN on 23											SpCas9-NRRH comp. NRRH on 22
rs587777603	ABHD12	26090	pathogenic		ACGCCCAAGGCAAAGACCAGATGTG<G>TATGAGGATGCCTTGGCTTCCAGCC	A	From G to A				VQR SpCas9 NGAN on 23									SpCas9 (From Strep. past.) NNGTGA on 20				AsCas12a RVR comp. TATV on 23									SpCas9-NRTH comp. NRTH on 23
rs1303044966	ABHD12	26090	pathogenic		TACTTTTCTGTGTTTTGGGGTTGTA<C>ATTGCCATTCCATTTCTCATCAAAC	T	From C to T										CjCas9 comp. NNNVRYM on 19							AsCas12a RVR TATV on 23 AsCas12a RVR comp. TATV on 24									SpCas9-NRTH NRTH on 23 SpCas9-NRTH comp. NRTH on 22
rs758316679	ABHD12	26090	pathogenic	Retinal dystrophy	CTATTCATTGCTTTTCTCTTGCAGG<C>GAAAGGGCGTGTGGTTGCGCCTGAG	T	From C to T						KKH SaCas9 NNNRRT on 20							SpCas9 (From Strep. past.) NNGTGA on 22
rs776800006	ABHD12	26090	pathogenic.likely-pathogenic	Polyneuropathy. hearing loss. ataxia. retinitis pigmentosa. and cataract (PHARC)	GTTTCCATCTTGTCTCCAGATATAT<C>GATACTTCCCTGGGTTTGACTGGTT	T	From C to T																				enAsCas12a VTTV on 23	FnCas12a TTV on 24
rs587777602	ABHD12	26090	pathogenic	Polyneuropathy. hearing loss. ataxia. retinitis pigmentosa. and cataract (PHARC)	TTCATTCAGACCTTGGCTACAGGCA<C>AAATACATTTACAAGAGCCCTGAGC	G	From C to G				VQR SpCas9 NGAN on 24				St1Cas9 NNRGAAW on 22							SpCas9-NRRH NRRH on 23 SpCas9-NRRH NRRH on 24								enAsCas12a comp. TTCN on 23 Cas12e (CasX) comp. TTCN on 23		xCas9 NG on 24 SpCas9-NG NG on 24
rs267606624	ABHD12	26090	pathogenic	Polyneuropathy. hearing loss. ataxia. retinitis pigmentosa. and cataract (PHARC)	GCTCTATAGCATCGCCGCACCAGCT<C>GAAGCTTCCGAGATTTCAAAGTTCA	T	From C to T																				enAsCas12a VTTV on 23	FnCas12a TTV on 24
rs104893676	ABHD5	51099	pathogenic	Triglyceride storage disease with ichthyosis (CDS)	GGCGGCTATGGCGGCGGAGGAGGAG<G>AGGTGGACTCTGCCGACACCGGAGA	A	From G to A				VQR SpCas9 NGAN on 23											SpCas9-NRRH NRRH on 22					enAsCas12a comp. VTTV on 23	FnCas12a comp. TTV on 24		enAsCas12a comp. TTCN on 24 Cas12e (CasX) comp. TTCN on 24
rs28939077	ABHD5	51099	pathogenic	Triglyceride storage disease with ichthyosis (CDS)	AGTGATGCAGAAGAAGTGGAGAATC<A>GTTTGTGGAATCCATTGAAGAGTGG	C	From A to C	SpCas9 comp. NGG on 24				SaCas9 comp. NNGRRT on 23							SpCas9-NG comp. NANG on 22			SpCas9-NRRH comp. NRRH on 24			AsCas12a RR TYCV on 23						SpCas9-NRRH comp. NGGN on 24 SpCas9-NRTH comp. NGGN on 24 SpCas9-NRCH comp. NGGN on 24	xCas9 comp. NG on 24 SpCas9-NG comp. NG on 24
rs752473449	ABHD5	51099	pathogenic		TGCTTTTGACCTATTGGGTTTTGGA<C>GAAGTAGTAGACCCAGGTTTGACAG	T	From C to T					SaCas9 NNGRRT on 20	KKH SaCas9 NNNRRT on 20
rs104893675	ABHD5	51099	pathogenic	Triglyceride storage disease with ichthyosis (CDS)	CCCACATGGTGCCCTACGTCTATAT<C>ACACCTTAAAGAAGCTGAAGAGAAG	G	From C to G				VQR SpCas9 NGAN on 24								SpCas9-NG NANG on 22			SpCas9-NRRH NRRH on 24										xCas9 NG on 24 SpCas9-NG NG on 24	SpCas9-NRTH comp. NRTH on 22
rs28939078	ABHD5	51099	pathogenic	Triglyceride storage disease with ichthyosis (CDS)	ATTTTCTCCTTGCCGTTAAAGTGGT<G>AGACAGCTTTCAAGAATATGACTAT	A	From G to A										CjCas9 NNNVRYM on 19										enAsCas12a comp. VTTV on 23	FnCas12a comp. TTV on 24					SpCas9-NRTH NRTH on 22
rs121913458	ABL1	25	likely-pathogenic	Chronic myelogenous leukemia (CML)	TGAAGCACAAGCTGGGCGGGGGCCA<G>TACGGGGAGGTGTACGAGGGCGTGT	T	From G to T						KKH SaCas9 comp. NNNRRT on 21						SpCas9-NG comp. NANG on 24			SpCas9-NRRH comp. NRRH on 23					enAsCas12a VTTV on 24	FnCas12a TTV on 25					SpCas9-NRTH NRTH on 23
rs121913448	ABL1	25	likely-pathogenic	Chronic myelogenous leukemia (CML)	CAAGCTGGGCGGGGGCCAGTACGGG<G>AGGTGTACGAGGGCGTGTGGAAGAA	A	From G to A				VQR SpCas9 NGAN on 23											SpCas9-NRRH NRRH on 22			AsCas12a RR comp. TYCV on 25		enAsCas12a comp. VTTV on 23	FnCas12a comp. TTV on 24		enAsCas12a comp. TTCN on 24 Cas12e (CasX) comp. TTCN on 24
rs121913459	ABL1	25	pathogenic.likely-pathogenic	Leukemia. Philadelphia chromosome-positive. resistant to imatinib. Chronic myelogenous leukemia (CML). Lymphoblastic leukemia. acute. with lymphomatous features (LALL)	CGGGAGCCCCCGTTCTATATCATCA<C>TGAGTTCATGACCTACGGGAACCTC	T	From C to T																				enAsCas12a VTTV on 24	FnCas12a TTV on 25					SpCas9-NRTH NRTH on 23
rs121913452	ABL1	25	likely-pathogenic	Chronic myelogenous leukemia (CML)	CATGGAGTACCTGGAGAAGAAAAAC<T>TCATCCACAGGTAGGGGCCTGGCCA	G	From T to G										CjCas9 NNNVRYM on 21		SpCas9-NG NANG on 22													xCas9 NG on 24 SpCas9-NG NG on 24	SpCas9-NRTH NRTH on 24
rs121913457	ABL1	25	pathogenic.likely-pathogenic	Chronic myeloid leukemia. resistant to imatinib. Chronic myelogenous leukemia (CML)	ATGGCCACTCAGATCTCGTCAGCCA<T>GGAGTACCTGGAGAAGAAAAACTTC	C	From T to C																									xCas9 comp. NG on 24 SpCas9-NG comp. NG on 24
rs1057519758	ABL1	25	likely-pathogenic	Chronic myelogenous leukemia (CML)	GGAGGACACCATGGAGGTGGAAGAG<T>TCTTGAAAGAAGCTGCAGTCATGAA	G	From T to G	SpCas9 NGG on 23					KKH SaCas9 NNNRRT on 21				CjCas9 NNNVRYM on 21 CjCas9 comp. NNNVRYM on 20		SpCas9-NG NANG on 22			SpCas9-NRRH NRRH on 23	SpCas9-NRCH comp. NRCH on 23								SpCas9-NRRH NGGN on 23 SpCas9-NRCH NGGN on 23	xCas9 NG on 24 SpCas9-NG NG on 24	SpCas9-NRTH NRTH on 24
rs1057519772	ABL1	25	likely-pathogenic	Chronic myelogenous leukemia (CML)	CCGGGAGCCCCCGTTCTATATCATC<A>CTGAGTTCATGACCTACGGGAACCT	G	From A to G		VRER SpCas9 comp. NGCG on 23																							xCas9 NG on 24 SpCas9-NG NG on 24
rs1057519773	ABL1	25	likely-pathogenic.not-provided	Chronic myelogenous leukemia (CML)	GCCCCCGTTCTATATCATCACTGAG<T>TCATGACCTACGGGAACCTCCTGGA	G	From T to G	SpCas9 NGG on 23					KKH SaCas9 NNNRRT on 21				CjCas9 NNNVRYM on 21 CjCas9 comp. NNNVRYM on 20		SpCas9-NG NANG on 22			SpCas9-NRRH NRRH on 23	SpCas9-NRCH comp. NRCH on 23								SpCas9-NRRH NGGN on 23 SpCas9-NRCH NGGN on 23	xCas9 NG on 24 SpCas9-NG NG on 24	SpCas9-NRTH NRTH on 24
rs1060499547	ABL1	25	pathogenic	Congenital heart disease (CHD). Failure to thrive. Abnormality of skeletal morphology. CONGENITAL HEART DEFECTS AND SKELETAL MALFORMATIONS SYNDROME (CHDSKM)	CCAAAGCGCAACAAGCCCACTGTCT<A>TGGTGTGTCCCCCAACTACGACAAG	G	From A to G																SpCas9-NRCH comp. NRCH on 23			enAsCas12a TGTV on 24						xCas9 NG on 24 SpCas9-NG NG on 24
rs121913453	ABL1	25	likely-pathogenic	Chronic myelogenous leukemia (CML)	ATCACCATGAAGCACAAGCTGGGCG<G>GGGCCAGTACGGGGAGGTGTACGAG	A	From G to A			EQR SpCas9 NGAG on 23	VQR SpCas9 NGAN on 23
rs121913454	ABL1	25	likely-pathogenic	Chronic myelogenous leukemia (CML)	ATGACAGGGGACACCTACACAGCCC<A>TGCTGGAGCCAAGTTCCCCATCAAA	G	From A to G																									xCas9 NG on 24 SpCas9-NG NG on 24
rs121913456	ABL1	25	likely-pathogenic	Chronic myelogenous leukemia (CML)	GGAGATGGAACGCACGGACATCACC<A>TGAAGCACAAGCTGGGCGGGGGCCA	G	From A to G													SpCas9 (From Strep. past.) NNGTGA on 23												xCas9 NG on 24 SpCas9-NG NG on 24
rs387906517	ABL1	25	pathogenic.likely-pathogenic	Leukemia. Philadelphia chromosome-positive. resistant to imatinib. Chronic myelogenous leukemia (CML)	TGTGTCCCCCAACTACGACAAGTGG<G>AGATGGAACGCACGGACATCACCAT	A	From G to A				VQR SpCas9 NGAN on 23											SpCas9-NRRH NRRH on 22			AsCas12a RR comp. TYCV on 25		enAsCas12a comp. VTTV on 23	FnCas12a comp. TTV on 24		enAsCas12a comp. TTCN on 24 Cas12e (CasX) comp. TTCN on 24
rs1060499548	ABL1	25	pathogenic	Congenital heart disease (CHD). Failure to thrive. Abnormality of skeletal morphology. CONGENITAL HEART DEFECTS AND SKELETAL MALFORMATIONS SYNDROME (CHDSKM)	GGAGTGCAACCGGCAGGAGGTGAAC<G>CCGTGGTGCTGCTGTACATGGCCAC	A	From G to A						KKH SaCas9 comp. NNNRRT on 20				CjCas9 NNNVRYM on 19						SpCas9-NRCH NRCH on 22
rs121913455	ABL1	25	likely-pathogenic	Chronic myelogenous leukemia (CML)	CACGGACATCACCATGAAGCACAAG<C>TGGGCGGGGGCCAGTACGGGGAGGT	G	From C to G	SpCas9 NGG on 23					KKH SaCas9 NNNRRT on 21				CjCas9 comp. NNNVRYM on 20		SpCas9-NG NANG on 22			SpCas9-NRRH NRRH on 23	SpCas9-NRCH comp. NRCH on 23								SpCas9-NRRH NGGN on 23 SpCas9-NRTH NGGN on 23	xCas9 NG on 24 SpCas9-NG NG on 24		St3Cas9 NGGNG on 23
rs1057519774	ABL1	25	likely-pathogenic	Chronic myelogenous leukemia (CML)	CCCCCGTTCTATATCATCACTGAGT<T>CATGACCTACGGGAACCTCCTGGAC	G	From T to G																SpCas9-NRCH NRCH on 24 SpCas9-NRCH comp. NRCH on 23									xCas9 NG on 24 SpCas9-NG NG on 24
rs121913451	ABL1	25	likely-pathogenic	Chronic myelogenous leukemia (CML)	CCCCGTTCTATATCATCACTGAGTT<C>ATGACCTACGGGAACCTCCTGGACT	G	From C to G				VQR SpCas9 NGAN on 24		KKH SaCas9 NNNRRT on 22				CjCas9 comp. NNNVRYM on 19					SpCas9-NRRH NRRH on 24										xCas9 NG on 24 SpCas9-NG NG on 24	SpCas9-NRTH comp. NRTH on 22
rs1057519775	ABL1	25	likely-pathogenic	Chronic myelogenous leukemia (CML)	ATGGAGTACCTGGAGAAGAAAAACT<T>CATCCACAGGTAGGGGCCTGGCCAG	G	From T to G																SpCas9-NRCH NRCH on 24 SpCas9-NRCH comp. NRCH on 23									xCas9 NG on 24 SpCas9-NG NG on 24
rs121913460	ABL1	25	likely-pathogenic	Chronic myelogenous leukemia (CML)	AAGCACAAGCTGGGCGGGGGCCAGT<A>CGGGGAGGTGTACGAGGGCGTGTGG	T	From A to T				VQR SpCas9 comp. NGAN on 23											SpCas9-NRRH comp. NRRH on 23 SpCas9-NRRH comp. NRRH on 24			AsCas12a RR TYCV on 24		enAsCas12a VTTV on 23	FnCas12a TTV on 24		enAsCas12a TTCN on 24 Cas12e (CasX) TTCN on 24
rs1057519771	ABL1	25	likely-pathogenic	Chronic myelogenous leukemia (CML)	GAAAGAGATCAAACACCCTAACCTG<G>TGCAGCTCCTTGGTGAGTAAGCCCG	C	From G to C										CjCas9 comp. NNNVRYM on 21					SpCas9-NRRH comp. NRRH on 23	SpCas9-NRCH NRCH on 23 SpCas9-NRCH comp. NRCH on 24									xCas9 comp. NG on 24 SpCas9-NG comp. NG on 24
rs121913461	ABL1	25	pathogenic.likely-pathogenic	Leukemia. Philadelphia chromosome-positive. resistant to imatinib. Chronic myelogenous leukemia (CML). Lymphoblastic leukemia. acute. with lymphomatous features (LALL)	GAAGCACAAGCTGGGCGGGGGCCAG<T>ACGGGGAGGTGTACGAGGGCGTGTG	C	From T to C																SpCas9-NRCH NRCH on 23									xCas9 comp. NG on 24 SpCas9-NG comp. NG on 24
rs121913450	ABL1	25	likely-pathogenic	Chronic myelogenous leukemia (CML)	ATCTCGTCAGCCATGGAGTACCTGG<A>GAAGAAAAACTTCATCCACAGGTAG	G	From A to G	SpCas9 NGG on 23																	AsCas12a RR comp. TYCV on 22 AsCas12a RR comp. TYCV on 23						SpCas9-NRRH NGGN on 23 SpCas9-NRTH NGGN on 23 SpCas9-NRCH NGGN on 23 SpCas9-NRTH NGGN on 24 SpCas9-NRCH NGGN on 24	xCas9 NG on 24 SpCas9-NG NG on 24
rs137853304	ABL1	25	pathogenic	Chronic myeloid leukemia. resistant to imatinib	AGGGGTCTGCACCCGGGAGCCCCCG<T>TCTATATCATCACTGAGTTCATGAC	C	From T to C		VRER SpCas9 comp. NGCG on 24	EQR SpCas9 comp. NGAG on 22													SpCas9-NRCH NRCH on 23									xCas9 comp. NG on 24 SpCas9-NG comp. NG on 24
rs121913449	ABL1	25	likely-pathogenic	Chronic myelogenous leukemia (CML)	AAGCTGGGCGGGGGCCAGTACGGGG<A>GGTGTACGAGGGCGTGTGGAAGAAA	T	From A to T					SaCas9 NNGRRT on 20	KKH SaCas9 NNNRRT on 20				CjCas9 comp. NNNVRYM on 21						SpCas9-NRCH comp. NRCH on 24
rs387906516	ABL1	25	pathogenic	Leukemia. Philadelphia chromosome-positive. resistant to imatinib	GTGTCCCCCAACTACGACAAGTGGG<A>GATGGAACGCACGGACATCACCATG	T	From A to T					SaCas9 NNGRRT on 20	KKH SaCas9 NNNRRT on 20				CjCas9 comp. NNNVRYM on 21			SpCas9 (From Strep. past.) NNGTGA on 22			SpCas9-NRCH comp. NRCH on 24
rs137876115_0	ABRAXAS1	84142	conflicting-interpretations-of-pathogenicity.likely-pathogenic.benign.uncertain-significance		AGAGAGGCTGCTTCACAAAAACTTG<C>AGGAGCATTTTTCAAACCAAGACCT	G	From C to G	SpCas9 NGG on 23		EQR SpCas9 NGAG on 24	VQR SpCas9 NGAN on 24											SpCas9-NRRH NRRH on 23			AsCas12a RR comp. TYCV on 24						SpCas9-NRRH NGGN on 23 SpCas9-NRTH NGGN on 23	xCas9 NG on 24 SpCas9-NG NG on 24		St3Cas9 NGGNG on 23
rs137876115_1	ABRAXAS1	84142	conflicting-interpretations-of-pathogenicity.likely-pathogenic.benign.uncertain-significance		AGAGAGGCTGCTTCACAAAAACTTG<C>AGGAGCATTTTTCAAACCAAGACCT	T	From C to T																			enAsCas12a TGTV on 23							SpCas9-NRTH NRTH on 23
rs778203609	ACAD8	27034	likely-pathogenic		CTTCTTGGTGTACCTATCAGCATGT<G>TGCCTGGATGATTGATAGCTTCGGA	A	From G to A																	AsCas12a RVR TATV on 24									SpCas9-NRTH NRTH on 22 SpCas9-NRTH comp. NRTH on 23
rs751940610	ACAD8	27034	likely-pathogenic		CTGAACGCGGAGCTGCGGCGGCTAT<G>CTGTGGAGCGGCTGCCGGCGTTTCG	T	From G to T				VQR SpCas9 comp. NGAN on 23	SaCas9 comp. NNGRRT on 22	KKH SaCas9 comp. NNNRRT on 22		St1Cas9 comp. NNRGAAW on 21							SpCas9-NRRH comp. NRRH on 23 SpCas9-NRRH comp. NRRH on 24					enAsCas12a VTTV on 23	FnCas12a TTV on 24		enAsCas12a TTCN on 24 Cas12e (CasX) TTCN on 24			SpCas9-NRTH NRTH on 22
rs779385985	ACAD8	27034	likely-pathogenic		TGTACCATGGAGAAGTTTGCTTCCT<A>CTGCCTCACTGAACCAGGTGAATTT	G	From A to G																SpCas9-NRCH comp. NRCH on 23									xCas9 NG on 24 SpCas9-NG NG on 24
rs767613745	ACAD8	27034	likely-pathogenic		TAGGAGCTGTTCCCAGTGGATGTGA<T>GCGGAAGGCAGCCCAGCTAGGCTTC	C	From T to C		VRER SpCas9 comp. NGCG on 22																							xCas9 comp. NG on 24 SpCas9-NG comp. NG on 24
rs374317179	ACAD8	27034	pathogenic.likely-pathogenic	Deficiency of isobutyryl-CoA dehydrogenase	TTCTTCTTGGTGTACCTATCAGCAT<G>TGTGCCTGGATGATTGATAGCTTCG	A	From G to A										CjCas9 NNNVRYM on 19							AsCas12a RVR TATV on 24 AsCas12a RVR comp. TATV on 25									SpCas9-NRTH NRTH on 22 SpCas9-NRTH comp. NRTH on 23
rs121908419	ACAD8	27034	pathogenic-likely-pathogenic.pathogenic	Deficiency of isobutyryl-CoA dehydrogenase	GGCCTTGCAGATGCACGGGGGCTAC<G>GCTACCTGAAGGATTACGCTGTTCA	A	From G to A																SpCas9-NRCH NRCH on 22			enAsCas12a comp. TGTV on 25
rs367857040	ACAD8	27034	uncertain-significance.likely-pathogenic		TATCAGCATGTGTGCCTGGATGATT<G>ATAGCTTCGGAAATGAGGAACAGAG	T	From G to T											LbCas12a & AsCas12a TTTV on 23				SpCas9-NRRH comp. NRRH on 24		AsCas12a RVR TATV on 25				FnCas12a TTV on 24
rs751633406	ACAD8	27034	uncertain-significance.likely-pathogenic	Deficiency of isobutyryl-CoA dehydrogenase	TACCTCTGTCATTTTTGAAGCCTTG<G>CTACAGGCTGCACCAGCACCACAGC	A	From G to A				VQR SpCas9 NGAN on 23		KKH SaCas9 comp. NNNRRT on 20																				SpCas9-NRTH comp. NRTH on 23
rs121908418	ACAD8	27034	pathogenic	Deficiency of isobutyryl-CoA dehydrogenase	AAATTTTGCCCACCGCTCTGTACCA<T>GGAGAAGTTTGCTTCCTACTGCCTC	C	From T to C																									xCas9 comp. NG on 24 SpCas9-NG comp. NG on 24
rs121908421_0	ACAD8	27034	pathogenic	Deficiency of isobutyryl-CoA dehydrogenase	CTTCCTGCTCCCTGGGGGCTGCCCA<C>GCCTCTGTCATCCTCACCCGAGACC	A	From C to A															SpCas9-NRRH NRRH on 24	SpCas9-NRCH comp. NRCH on 22				enAsCas12a comp. VTTV on 24	FnCas12a comp. TTV on 25
rs121908421_1	ACAD8	27034	pathogenic		CTTCCTGCTCCCTGGGGGCTGCCCA<C>GCCTCTGTCATCCTCACCCGAGACC	T	From C to T										CjCas9 comp. NNNVRYM on 19						SpCas9-NRCH comp. NRCH on 22
rs200620279	ACAD8	27034	pathogenic.uncertain-significance	Deficiency of isobutyryl-CoA dehydrogenase	GCTGCAGTACTTGCAATTCACACTG<G>CTGATATGGCAACAAGGCTGGTGGC	A	From G to A				VQR SpCas9 NGAN on 23		KKH SaCas9 comp. NNNRRT on 20																				SpCas9-NRTH comp. NRTH on 23
rs762521317	ACAD9	28976	pathogenic	Acyl-CoA dehydrogenase family. member 9. deficiency of (MC1DN20)	AAAGCCAAATACTTGCCTAAACTGG<C>GTCCGGGGAGCACATTGCAGCCTTC	T	From C to T						KKH SaCas9 NNNRRT on 20				CjCas9 comp. NNNVRYM on 19						SpCas9-NRCH comp. NRCH on 22			enAsCas12a TGTV on 25
rs770127110	ACAD9	28976	pathogenic	Acyl-CoA dehydrogenase family. member 9. deficiency of (MC1DN20)	ATGGAGGAGCAGCTGGTACTGAAGC<G>GGTGGCCAACATCCTCATCAACCTG	A	From G to A										CjCas9 NNNVRYM on 19						SpCas9-NRCH NRCH on 22
rs150283105	ACAD9	28976	pathogenic	Acyl-CoA dehydrogenase family. member 9. deficiency of (MC1DN20). Acyl-CoA dehydrogenase family. member 9. deficiency of (MC1DN20)	CCGGACCGTGGAGACACTGCTGCTC<C>GCTTTGGCAAGGTAACCAGGCCCTC	T	From C to T										CjCas9 comp. NNNVRYM on 19						SpCas9-NRCH comp. NRCH on 22
rs149753643	ACAD9	28976	pathogenic	Acyl-CoA dehydrogenase family. member 9. deficiency of (MC1DN20)	GGGCTACACAAGGGACTATCCGTAC<G>AGCGCATACTGCGTGACACCCGCAT	A	From G to A																SpCas9-NRCH NRCH on 22			enAsCas12a comp. TGTV on 25	enAsCas12a comp. VTTV on 23	FnCas12a comp. TTV on 24
rs863225057	ACAD9	28976	pathogenic	Acyl-CoA dehydrogenase family. member 9. deficiency of (MC1DN20)	TGAGGCTGGGGAACATCGGGCAGCA<T>GAGCGGCTGCGGGCTCTTCCTGCGC	G	From T to G	SpCas9 NGG on 24														SpCas9-NRRH NRRH on 24									SpCas9-NRRH NGGN on 24 SpCas9-NRTH NGGN on 24 SpCas9-NRCH NGGN on 24	xCas9 NG on 24 SpCas9-NG NG on 24		St3Cas9 NGGNG on 24
rs368949613	ACAD9	28976	pathogenic	Acyl-CoA dehydrogenase family. member 9. deficiency of (MC1DN20). Acyl-CoA dehydrogenase family. member 9. deficiency of (MC1DN20)	GGACTATCCGTACGAGCGCATACTG<C>GTGACACCCGCATCCTCCTCATCTT	T	From C to T										CjCas9 comp. NNNVRYM on 19						SpCas9-NRCH comp. NRCH on 22			enAsCas12a TGTV on 23 enAsCas12a TGTV on 25
rs777282696	ACAD9	28976	likely-pathogenic		CTACACAAGGGACTATCCGTACGAG<C>GCATACTGCGTGACACCCGCATCCT	T	From C to T					SaCas9 NNGRRT on 20	KKH SaCas9 NNNRRT on 20										SpCas9-NRCH comp. NRCH on 22
rs146453758	ACAD9	28976	likely-pathogenic		CGGGGAGCACATTGCAGCCTTCTGC<C>TCACGGAGCCAGCCAGGTCTGTCTC	T	From C to T															SpCas9-NRRH comp. NRRH on 22			AsCas12a RR TYCV on 25		enAsCas12a VTTV on 24	FnCas12a TTV on 25		enAsCas12a TTCN on 25 Cas12e (CasX) TTCN on 25
rs761102100	ACAD9	28976	likely-pathogenic		CAAATACTTGCCTAAACTGGCGTCC<G>GGGAGCACATTGCAGCCTTCTGCCT	C	From G to C	SpCas9 comp. NGG on 24																							SpCas9-NRRH comp. NGGN on 24 SpCas9-NRTH comp. NGGN on 24 SpCas9-NRCH comp. NGGN on 24	xCas9 comp. NG on 24 SpCas9-NG comp. NG on 24
rs377022708	ACAD9	28976	likely-pathogenic.pathogenic	Acyl-CoA dehydrogenase family. member 9. deficiency of (MC1DN20). Acyl-CoA dehydrogenase family. member 9. deficiency of (MC1DN20)	CATGGAGGAGCAGCTGGTACTGAAG<C>GGGTGGCCAACATCCTCATCAACCT	T	From C to T						KKH SaCas9 NNNRRT on 20
rs115532916	ACAD9	28976	uncertain-significance.likely-benign.pathogenic.benign	Acyl-CoA dehydrogenase family. member 9. deficiency of (MC1DN20)	TTCCTCAGAAATGACTGCTGAGTAC<G>CCTGCACAAGGAAACAGTTTAACAA	C	From G to C	SpCas9 comp. NGG on 23 SpCas9 comp. NGG on 24				SaCas9 comp. NNGRRT on 22	KKH SaCas9 comp. NNNRRT on 22									SpCas9-NRRH comp. NRRH on 24	SpCas9-NRCH NRCH on 22								SpCas9-NRRH comp. NGGN on 23 SpCas9-NRTH comp. NGGN on 23 SpCas9-NRCH comp. NGGN on 23 SpCas9-NRRH comp. NGGN on 24 SpCas9-NRTH comp. NGGN on 24 SpCas9-NRCH comp. NGGN on 24	xCas9 comp. NG on 24 SpCas9-NG comp. NG on 24
rs863225056	ACAD9	28976	pathogenic	Acyl-CoA dehydrogenase family. member 9. deficiency of (MC1DN20)	ACAGTTTAACAAGAGGCTCAGTGAA<T>TTGGATTGATTCAGGTACCAATGGT	G	From T to G						KKH SaCas9 NNNRRT on 21						SpCas9-NG NANG on 22			SpCas9-NRRH NRRH on 23	SpCas9-NRCH comp. NRCH on 23				enAsCas12a VTTV on 25					xCas9 NG on 24 SpCas9-NG NG on 24	SpCas9-NRTH NRTH on 24
rs778558550	ACAD9	28976	likely-pathogenic		CAGGTTCTCTTGGCCAACACCTTCT<G>CGTGGAAGCTTACTTGCAGAATCTC	C	From G to C	SpCas9 comp. NGG on 23		EQR SpCas9 comp. NGAG on 24	VQR SpCas9 comp. NGAN on 24											SpCas9-NRRH comp. NRRH on 23			AsCas12a RR TYCV on 24						SpCas9-NRRH comp. NGGN on 23 SpCas9-NRTH comp. NGGN on 23	xCas9 comp. NG on 24 SpCas9-NG comp. NG on 24		St3Cas9 comp. NGGNG on 23
rs773949927	ACAD9	28976	pathogenic		CTGAGGCTGGGGAACATCGGGCAGC<A>TGAGCGGCTGCGGGCTCTTCCTGCG	T	From A to T															SpCas9-NRRH comp. NRRH on 24					enAsCas12a VTTV on 24	FnCas12a TTV on 25
rs370266841	ACAD9	28976	likely-pathogenic		CAATGAGATTCTCCGGATGTACATC<G>CCCTGACGGGTCTGCAGCATGCCGG	A	From G to A					SaCas9 comp. NNGRRT on 20	KKH SaCas9 comp. NNNRRT on 20							SpCas9 (From Strep. past.) comp. NNGTGA on 22
rs1057518752	ACAD9	28976	pathogenic	Acyl-CoA dehydrogenase family. member 9. deficiency of (MC1DN20)	CCGCATTGGGCTCCGCAACCACGAC<C>ACGAGGTGAGCCCAGCCCAGCCTCA	G	From C to G				VQR SpCas9 NGAN on 24						CjCas9 comp. NNNVRYM on 19		SpCas9-NG NANG on 22			SpCas9-NRRH NRRH on 24										xCas9 NG on 24 SpCas9-NG NG on 24	SpCas9-NRTH comp. NRTH on 22
rs753711253	ACAD9	28976	pathogenic	Acyl-CoA dehydrogenase family. member 9. deficiency of (MC1DN20)	GAAACCCGAAGATAAATTAGGCATT<C>GGGGCTCCAACAGTAAGTAGCTCCT	T	From C to T											LbCas12a & AsCas12a TTTV on 23										FnCas12a TTV on 24
rs778786636_0	ACAD9	28976	likely-pathogenic		AGTGTCCCAGCAGATCCTTGAGAAG<C>GAGCCTATATCTGTGCCCACCCTCT	G	From C to G	SpCas9 NGG on 23 SpCas9 NGG on 24											SpCas9-NG NANG on 22			SpCas9-NRRH NRRH on 24			AsCas12a RR comp. TYCV on 23						SpCas9-NRRH NGGN on 23 SpCas9-NRTH NGGN on 23 SpCas9-NRCH NGGN on 23 SpCas9-NRRH NGGN on 24 SpCas9-NRTH NGGN on 24 SpCas9-NRCH NGGN on 24	xCas9 NG on 24 SpCas9-NG NG on 24		St3Cas9 NGGNG on 24
rs778786636_1	ACAD9	28976	likely-pathogenic		AGTGTCCCAGCAGATCCTTGAGAAG<C>GAGCCTATATCTGTGCCCACCCTCT	T	From C to T						KKH SaCas9 NNNRRT on 20							SpCas9 (From Strep. past.) NNGTGA on 22
rs863224845	ACAD9	28976	likely-pathogenic	Acyl-CoA dehydrogenase family. member 9. deficiency of (MC1DN20)	GAAGCGAGCCTATATCTGTGCCCAC<C>CTCTGGACAGGACATGCTGAGGCAG	T	From C to T			EQR SpCas9 comp. NGAG on 23	VQR SpCas9 comp. NGAN on 23											SpCas9-NRRH comp. NRRH on 22
rs387907041	ACAD9	28976	pathogenic	Acyl-CoA dehydrogenase family. member 9. deficiency of (MC1DN20)	TGTACGAGCTTTCGCCAAAGAGCTT<T>TCCTAGGCAAAATCAAGAAGGTAAC	A	From T to A					SaCas9 comp. NNGRRT on 20	KKH SaCas9 comp. NNNRRT on 20				CjCas9 comp. NNNVRYM on 20							AsCas12a RVR TATV on 24			enAsCas12a VTTV on 22	FnCas12a TTV on 23					SpCas9-NRTH NRTH on 24 SpCas9-NRTH comp. NRTH on 23
rs1057520214	ACADM	34	likely-pathogenic.uncertain-significance	Medium-chain acyl-coenzyme A dehydrogenase deficiency (ACADMD)	CTGCTCGTAAATTTGCCAGAGAGGA<A>ATCATCCCAGTGGCTGCAGAATATG	C	From A to C										CjCas9 NNNVRYM on 20		SpCas9-NG comp. NANG on 22				SpCas9-NRCH NRCH on 23			enAsCas12a comp. TGTV on 24						xCas9 comp. NG on 24 SpCas9-NG comp. NG on 24	SpCas9-NRTH comp. NRTH on 24
rs121434282	ACADM	34	pathogenic	Medium-chain acyl-coenzyme A dehydrogenase deficiency (ACADMD)	GCAATGGGAGCTTTTGATAAAACCA<G>ACCTGTAGTAAGTAATATGGGTTCA	C	From G to C										CjCas9 NNNVRYM on 20						SpCas9-NRCH NRCH on 23			enAsCas12a comp. TGTV on 24						xCas9 comp. NG on 24 SpCas9-NG comp. NG on 24		St3Cas9 comp. NGGNG on 21
rs875989867	ACADM	34	pathogenic	Medium-chain acyl-coenzyme A dehydrogenase deficiency (ACADMD)	CATGGGCCAGCGATGTTCAGATACT<A>GAGGAATTGTCTTCGAAGATGTGAA	G	From A to G																		AsCas12a RR comp. TYCV on 23						SpCas9-NRTH NGGN on 24 SpCas9-NRCH NGGN on 24	xCas9 NG on 24 SpCas9-NG NG on 24		St3Cas9 NGGNG on 24
rs121434275	ACADM	34	pathogenic	Medium-chain acyl-coenzyme A dehydrogenase deficiency (ACADMD)	CAGTTAGCTACTGATGCTGTGCAGA<T>ACTTGGAGGCAATGGATTTAATACA	C	From T to C																SpCas9-NRCH NRCH on 23			enAsCas12a comp. TGTV on 24						xCas9 comp. NG on 24 SpCas9-NG comp. NG on 24
rs754359356	ACADM	34	uncertain-significance.likely-pathogenic	Medium-chain acyl-coenzyme A dehydrogenase deficiency (ACADMD)	AGAAAGGAGATGAGTATATTATTAA<T>GGTCAGAAGATGTGGATAACCAACG	A	From T to A											LbCas12a & AsCas12a comp. TTTV on 25	SpCas9-NG NANG on 24
rs778906552	ACADM	34	pathogenic.pathogenic-likely-pathogenic	Medium-chain acyl-coenzyme A dehydrogenase deficiency (ACADMD)	CAACAAAAGAAGAAGTATTTGGGGA<G>AATGACTGAGGAGCCATTGATGTGT	A	From G to A								St1Cas9 NNRGAAW on 20			LbCas12a & AsCas12a comp. TTTV on 24				SpCas9-NRRH NRRH on 22			AsCas12a RR comp. TYCV on 25			FnCas12a comp. TTV on 25	enAsCas12a comp. TTTT on 23	enAsCas12a comp. TTCN on 25 Cas12e (CasX) comp. TTCN on 25
rs1057516485	ACADM	34	likely-pathogenic		TTTTAATTCTAGCACCAAGCAATAT<C>ATTTATGCTGGCTGAAATGGCAATG	T	From C to T										CjCas9 comp. NNNVRYM on 19										enAsCas12a VTTV on 23	FnCas12a TTV on 24					SpCas9-NRTH comp. NRTH on 22
rs201375579	ACADM	34	conflicting-interpretations-of-pathogenicity.pathogenic	Medium-chain acyl-coenzyme A dehydrogenase deficiency (ACADMD)	CCTAAAGAAAATGTTTTAATTGGTG<A>CGGAGCTGGTTTCAAAGTTGCAATG	G	From A to G	SpCas9 NGG on 23	VRER SpCas9 NGCG on 24														SpCas9-NRCH comp. NRCH on 23								SpCas9-NRTH NGGN on 23 SpCas9-NRCH NGGN on 23	xCas9 NG on 24 SpCas9-NG NG on 24		St3Cas9 NGGNG on 23
rs1215335509	ACADM	34	likely-pathogenic		GGATGAAGCTACCAAGTATGCCCTG<G>AAAGGAAAACTTTCGGAAAGCTACT	A	From G to A				VQR SpCas9 NGAN on 23							LbCas12a & AsCas12a comp. TTTV on 23										FnCas12a comp. TTV on 24	enAsCas12a comp. TTTT on 22	enAsCas12a comp. TTCN on 24 Cas12e (CasX) comp. TTCN on 24
rs786204631	ACADM	34	likely-pathogenic	Medium-chain acyl-coenzyme A dehydrogenase deficiency (ACADMD)	GCAATATCATTTATGCTGGCTGAAA<T>GGCAATGAAAGTTGAACTAGCTAGA	C	From T to C																									xCas9 comp. NG on 24 SpCas9-NG comp. NG on 24
rs373715782	ACADM	34	likely-pathogenic.pathogenic.pathogenic-likely-pathogenic	Medium-chain acyl-coenzyme A dehydrogenase deficiency (ACADMD)	ATCTCTTAGGTATTTTTTATTGGCA<C>GTTCTGATCCAGATCCTAAAGCTCC	T	From C to T										CjCas9 comp. NNNVRYM on 19						SpCas9-NRCH comp. NRCH on 22
rs875989876	ACADM	34	pathogenic	Medium-chain acyl-coenzyme A dehydrogenase deficiency (ACADMD)	GGGAGAATGACTGAGGAGCCATTGA<T>GTGTGTGAGTATGTGTAACTGCCGC	C	From T to C												SpCas9-NG comp. NANG on 22													xCas9 comp. NG on 24 SpCas9-NG comp. NG on 24
rs1462472677	ACADM	34	likely-pathogenic		ATTTTTCTTGCAGATTTATGAAGGT<A>CTTCACAAATTCAAAGACTTATTGT	T	From A to T				VQR SpCas9 comp. NGAN on 23						CjCas9 comp. NNNVRYM on 22					SpCas9-NRRH comp. NRRH on 23 SpCas9-NRRH comp. NRRH on 24					enAsCas12a VTTV on 23	FnCas12a TTV on 24		enAsCas12a TTCN on 24 Cas12e (CasX) TTCN on 24
rs121434276	ACADM	34	pathogenic	Medium-chain acyl-coenzyme A dehydrogenase deficiency (ACADMD)	TTAGGAATTAAACATGGGCCAGCGA<T>GTTCAGATACTAGAGGAATTGTCTT	C	From T to C												SpCas9-NG comp. NANG on 22													xCas9 comp. NG on 24 SpCas9-NG comp. NG on 24
rs1227800781	ACADM	34	pathogenic		GTTGATTCTGGTCGTCGAAATACCT<A>TTATGCTTCTATTGCAAAGGCATTT	G	From A to G																SpCas9-NRCH comp. NRCH on 23									xCas9 NG on 24 SpCas9-NG NG on 24
rs398123074	ACADM	34	pathogenic	Medium-chain acyl-coenzyme A dehydrogenase deficiency (ACADMD)	TTCTTCTAGTATCCAGTCCCCCTAA<T>TAGAAGAGCCTGGGAACTTGGTTTA	C	From T to C																SpCas9-NRCH NRCH on 23									xCas9 comp. NG on 24 SpCas9-NG comp. NG on 24
rs121434278	ACADM	34	pathogenic.pathogenic-likely-pathogenic	Medium-chain acyl-coenzyme A dehydrogenase deficiency (ACADMD)	TGGTCAGAAGATGTGGATAACCAAC<G>GAGGAAAAGCTAATTGGTATGTTGT	A	From G to A										CjCas9 NNNVRYM on 19						SpCas9-NRCH NRCH on 22
rs745844469	ACADM	34	likely-pathogenic.uncertain-significance	Medium-chain acyl-coenzyme A dehydrogenase deficiency (ACADMD)	GTAACAGAACCTGGAGCAGGCTCTG<A>TGTAGCTGGTATAAAGACCAAAGCA	C	From A to C										CjCas9 comp. NNNVRYM on 21					SpCas9-NRRH comp. NRRH on 23	SpCas9-NRCH NRCH on 23 SpCas9-NRCH comp. NRCH on 24									xCas9 comp. NG on 24 SpCas9-NG comp. NG on 24
rs780504551	ACADM	34	likely-pathogenic	Medium-chain acyl-coenzyme A dehydrogenase deficiency (ACADMD)	CAATGGGAGCTTTTGATAAAACCAG<A>CCTGTAGTAAGTAATATGGGTTCAT	T	From A to T				VQR SpCas9 comp. NGAN on 23		KKH SaCas9 NNNRRT on 20				CjCas9 NNNVRYM on 20					SpCas9-NRRH comp. NRRH on 23	SpCas9-NRCH comp. NRCH on 24										SpCas9-NRTH NRTH on 23
rs121434274	ACADM	34	pathogenic.pathogenic-likely-pathogenic	Medium-chain acyl-coenzyme A dehydrogenase deficiency (ACADMD)	TAAAGAAAATGTTTTAATTGGTGAC<G>GAGCTGGTTTCAAAGTTGCAATGGG	A	From G to A										CjCas9 NNNVRYM on 19						SpCas9-NRCH NRCH on 22			enAsCas12a comp. TGTV on 25
rs770273135	ACADM	34	likely-pathogenic	Hydrocephalus. congenital. 2. with or without brain or eye anomalies (HYC2)	GAAGCAGATACCCCAGGAATTCAGA<T>TGGGAGAAAGGTAAAGTATTTATTA	C	From T to C																SpCas9-NRCH NRCH on 23									xCas9 comp. NG on 24 SpCas9-NG comp. NG on 24
rs762114560	ACADM	34	pathogenic-likely-pathogenic.pathogenic	Medium-chain acyl-coenzyme A dehydrogenase deficiency (ACADMD)	CCCCCTAATTAGAAGAGCCTGGGAA<C>TTGGTTTAATGAACACACACATTCC	T	From C to T					SaCas9 NNGRRT on 20	KKH SaCas9 NNNRRT on 20		St1Cas9 NNRGAAW on 19			LbCas12a & AsCas12a TTTV on 25				SpCas9-NRRH comp. NRRH on 22											SpCas9-NRTH NRTH on 23
rs121434277	ACADM	34	pathogenic.conflicting-interpretations-of-pathogenicity	Medium-chain acyl-coenzyme A dehydrogenase deficiency (ACADMD)	AAAAGAAGAAGTATTTGGGGAGAAT<G>ACTGAGGAGCCATTGATGTGTGTGA	T	From G to T						KKH SaCas9 comp. NNNRRT on 22									SpCas9-NRRH comp. NRRH on 24					enAsCas12a VTTV on 23	FnCas12a TTV on 24					SpCas9-NRTH NRTH on 22
rs1057521114	ACADM	34	likely-pathogenic		TTAACTCAGTTCTTTTTCTTCTAGT<A>TCCAGTCCCCCTAATTAGAAGAGCC	G	From A to G																SpCas9-NRCH comp. NRCH on 23			enAsCas12a TGTV on 24						xCas9 NG on 24 SpCas9-NG NG on 24
rs121434283	ACADM	34	pathogenic	Medium-chain acyl-coenzyme A dehydrogenase deficiency (ACADMD)	GCTTATGGATGTACAGGGGTTCAGA<C>TGCTATTGAAGGAAATTCTTTGGGG	T	From C to T						KKH SaCas9 NNNRRT on 20	NmCas9 NNNNGATT on 19													enAsCas12a VTTV on 24	FnCas12a TTV on 25					SpCas9-NRTH NRTH on 23
rs748110745	ACADM	34	likely-pathogenic	Medium-chain acyl-coenzyme A dehydrogenase deficiency (ACADMD)	ACTTGGAGGCAATGGATTTAATACA<G>AATATCCTGTAGAAAAACTAATGAG	T	From G to T										CjCas9 NNNVRYM on 20		SpCas9-NG comp. NANG on 24					AsCas12a RVR comp. TATV on 24									SpCas9-NRTH NRTH on 23
rs746136472	ACADM	34	likely-pathogenic.uncertain-significance	Medium-chain acyl-coenzyme A dehydrogenase deficiency (ACADMD)	GGACTTGGAACTTTTGATGCTTGTT<T>AATTAGTGAAGAATTGGCTTATGGA	C	From T to C				VQR SpCas9 comp. NGAN on 24														AsCas12a RR TYCV on 23		enAsCas12a VTTV on 22	FnCas12a TTV on 23		enAsCas12a TTCN on 23 Cas12e (CasX) TTCN on 23		xCas9 comp. NG on 24 SpCas9-NG comp. NG on 24
rs779759347	ACADM	34	pathogenic.likely-pathogenic	Medium-chain acyl-coenzyme A dehydrogenase deficiency (ACADMD)	GCTGGTGCTGTTGGATTAGCACAAA<G>AGCTTTGGATGAAGCTACCAAGTAT	C	From G to C										CjCas9 NNNVRYM on 20					SpCas9-NRRH NRRH on 22	SpCas9-NRCH NRCH on 23									xCas9 comp. NG on 24 SpCas9-NG comp. NG on 24	SpCas9-NRTH comp. NRTH on 24
rs766140986	ACADM	34	likely-pathogenic		GAGGTTGATTCTGGTCGTCGAAATA<C>CTATTATGCTTCTATTGCAAAGGCA	T	From C to T				VQR SpCas9 comp. NGAN on 23											SpCas9-NRRH comp. NRRH on 22		AsCas12a RVR TATV on 23									SpCas9-NRTH NRTH on 23
rs398123075	ACADM	34	likely-pathogenic.uncertain-significance	Medium-chain acyl-coenzyme A dehydrogenase deficiency (ACADMD)	CCTAATTAGAAGAGCCTGGGAACTT<G>GTTTAATGAACACACACATTCCAGA	T	From G to T											LbCas12a & AsCas12a TTTV on 23				SpCas9-NRRH comp. NRRH on 24						FnCas12a TTV on 24
rs121434279	ACADM	34	pathogenic	Medium-chain acyl-coenzyme A dehydrogenase deficiency (ACADMD)	TATTAATGGTCAGAAGATGTGGATA<A>CCAACGGAGGAAAAGCTAATTGGTA	G	From A to G																SpCas9-NRCH comp. NRCH on 23									xCas9 NG on 24 SpCas9-NG NG on 24
rs148207467_0	ACADM	34	likely-pathogenic.pathogenic		AGCTTGGGAGGTTGATTCTGGTCGT<C>GAAATACCTATTATGCTTCTATTGC	A	From C to A								St1Cas9 NNRGAAW on 23							SpCas9-NRRH NRRH on 24
rs148207467_1	ACADM	34	likely-pathogenic.pathogenic	Medium-chain acyl-coenzyme A dehydrogenase deficiency (ACADMD)	AGCTTGGGAGGTTGATTCTGGTCGT<C>GAAATACCTATTATGCTTCTATTGC	T	From C to T																				enAsCas12a VTTV on 23	FnCas12a TTV on 24
rs1057516778	ACADM	34	likely-pathogenic	Medium-chain acyl-coenzyme A dehydrogenase deficiency (ACADMD)	CCGAGTGGCCGGAACGGGAGCCAAC<A>TGGCAGCGGGGTTCGGGCGATGCTG	G	From A to G												SpCas9-NG NANG on 22													xCas9 NG on 24 SpCas9-NG NG on 24
rs77931234	ACADM	34	pathogenic	Medium-chain acyl-coenzyme A dehydrogenase deficiency (ACADMD)	ATTTATGCTGGCTGAAATGGCAATG<A>AAGTTGAACTAGCTAGAATGAGTTA	G	From A to G	SpCas9 NGG on 23			VQR SpCas9 NGAN on 24														AsCas12a RR comp. TYCV on 23		enAsCas12a comp. VTTV on 22	FnCas12a comp. TTV on 23		enAsCas12a comp. TTCN on 23 Cas12e (CasX) comp. TTCN on 23	SpCas9-NRTH NGGN on 23 SpCas9-NRCH NGGN on 23	xCas9 NG on 24 SpCas9-NG NG on 24
rs753928772_0	ACADM	34	pathogenic.uncertain-significance	Medium-chain acyl-coenzyme A dehydrogenase deficiency (ACADMD)	TAGCCCGTGAACACATTGACAAGTA<C>AAAAATTAAAAAAATTACTGTAGAA	A	From C to A											LbCas12a & AsCas12a comp. TTTV on 24				SpCas9-NRRH NRRH on 23 SpCas9-NRRH NRRH on 24						FnCas12a comp. TTV on 25	enAsCas12a comp. TTTT on 22 enAsCas12a comp. TTTT on 23
rs753928772_1	ACADM	34	pathogenic.uncertain-significance		TAGCCCGTGAACACATTGACAAGTA<C>AAAAATTAAAAAAATTACTGTAGAA	T	From C to T																	AsCas12a RVR TATV on 23 AsCas12a RVR comp. TATV on 24									SpCas9-NRTH NRTH on 23
rs200724875	ACADM	34	likely-pathogenic.pathogenic-likely-pathogenic	Medium-chain acyl-coenzyme A dehydrogenase deficiency (ACADMD)	TCTCTTAGGTATTTTTTATTGGCAC<G>TTCTGATCCAGATCCTAAAGCTCCT	T	From G to T						KKH SaCas9 comp. NNNRRT on 22		St1Cas9 comp. NNRGAAW on 19			LbCas12a & AsCas12a TTTV on 25				SpCas9-NRRH comp. NRRH on 24	SpCas9-NRCH NRCH on 22
rs751829413	ACADM	34	pathogenic	Medium-chain acyl-coenzyme A dehydrogenase deficiency (ACADMD)	TATGTGTATCTCTTAGGTATTTTTT<A>TTGGCACGTTCTGATCCAGATCCTA	C	From A to C				VQR SpCas9 comp. NGAN on 24				St1Cas9 comp. NNRGAAW on 22				SpCas9-NG comp. NANG on 22			SpCas9-NRRH comp. NRRH on 23 SpCas9-NRRH comp. NRRH on 24								enAsCas12a TTCN on 23 Cas12e (CasX) TTCN on 23		xCas9 comp. NG on 24 SpCas9-NG comp. NG on 24
rs398123072	ACADM	34	pathogenic.pathogenic-likely-pathogenic	Medium-chain acyl-coenzyme A dehydrogenase deficiency (ACADMD)	GCAGAAAGAATTTCAAGCTACTGCT<C>GTAAATTTGCCAGAGAGGAAATCAT	T	From C to T																SpCas9-NRCH comp. NRCH on 22			enAsCas12a TGTV on 25	enAsCas12a VTTV on 23	FnCas12a TTV on 24
rs1057518408	ACADM	34	likely-pathogenic		AAACATGGGCCAGCGATGTTCAGAT<A>CTAGAGGAATTGTCTTCGAAGATGT	G	From A to G										CjCas9 comp. NNNVRYM on 22		SpCas9-NG NANG on 22				SpCas9-NRCH comp. NRCH on 23									xCas9 NG on 24 SpCas9-NG NG on 24
rs28940875	ACADS	35	likely-pathogenic.pathogenic	Deficiency of butyryl-CoA dehydrogenase (ACADSD)	CTACGTGACAGAGATGCCGGCAGAG<C>GGCACTACCGCGACGCCCGCATCAC	T	From C to T					SaCas9 NNGRRT on 20	KKH SaCas9 NNNRRT on 20
rs374726386	ACADS	35	likely-pathogenic.uncertain-significance	Deficiency of butyryl-CoA dehydrogenase (ACADSD)	CCACAGCAAACCCTGGACATGGGCC<G>CATCGGCATCGCCTCCCAGGCCCTG	A	From G to A																			enAsCas12a comp. TGTV on 23
rs121908004	ACADS	35	pathogenic	Deficiency of butyryl-CoA dehydrogenase (ACADSD)	CGTGCCCGAGGAGCTTGGCGGTGCT<G>GCCTCGATTACCTGGCCTACGCCAT	T	From G to T												SpCas9-NG comp. NANG on 24								enAsCas12a VTTV on 23	FnCas12a TTV on 24
rs767155955	ACADS	35	likely-pathogenic		GGCCTACGCCATCGCCATGGAGGAG<A>TCAGCCGTGGCTGCGCCTCCACCGG	T	From A to T					SaCas9 NNGRRT on 20	KKH SaCas9 NNNRRT on 20									SpCas9-NRRH comp. NRRH on 23	SpCas9-NRCH comp. NRCH on 24		AsCas12a RR TYCV on 25		enAsCas12a VTTV on 24	FnCas12a TTV on 25		enAsCas12a TTCN on 25 Cas12e (CasX) TTCN on 25			SpCas9-NRTH NRTH on 23
rs1057516848	ACADS	35	likely-pathogenic	Deficiency of butyryl-CoA dehydrogenase (ACADSD)	ACCACCGCCCGGGCCGAGGGCGACT<C>ATGGGTTCTGAATGGAACCAAAGCC	A	From C to A						KKH SaCas9 NNNRRT on 22									SpCas9-NRRH NRRH on 24					enAsCas12a comp. VTTV on 23	FnCas12a comp. TTV on 24					SpCas9-NRTH comp. NRTH on 22
rs61732144	ACADS	35	pathogenic	Deficiency of butyryl-CoA dehydrogenase (ACADSD)	CGCCATCGCCATGGAGGAGATCAGC<C>GTGGCTGCGCCTCCACCGGAGTCAT	T	From C to T										CjCas9 comp. NNNVRYM on 19						SpCas9-NRCH comp. NRCH on 22			enAsCas12a TGTV on 25
rs28941773	ACADS	35	conflicting-interpretations-of-pathogenicity.likely-pathogenic	Deficiency of butyryl-CoA dehydrogenase (ACADSD)	GCAGCCATGGCCAAGCTGGCCGCCT<C>GGAGGCCGCGACCGCCATCAGCCAC	T	From C to T																				enAsCas12a VTTV on 23	FnCas12a TTV on 24
rs121908005	ACADS	35	pathogenic		CATGGACGTGCCCGAGGAGCTTGGC<G>GTGCTGGCCTCGATTACCTGGCCTA	T	From G to T															SpCas9-NRRH comp. NRRH on 24	SpCas9-NRCH NRCH on 22			enAsCas12a TGTV on 25
rs780571371	ACADS	35	likely-pathogenic.uncertain-significance		CATGGAGGAGATCAGCCGTGGCTGC<G>CCTCCACCGGAGTCATCATGAGTGT	T	From G to T			EQR SpCas9 comp. NGAG on 23	VQR SpCas9 comp. NGAN on 23											SpCas9-NRRH comp. NRRH on 24	SpCas9-NRCH NRCH on 22
rs117356004	ACADS	35	likely-pathogenic		CATCGCCATGGAGGAGATCAGCCGT<G>GCTGCGCCTCCACCGGAGTCATCAT	A	From G to A										CjCas9 NNNVRYM on 19																SpCas9-NRTH NRTH on 22
rs1291226969	ACADS	35	likely-pathogenic	Deficiency of butyryl-CoA dehydrogenase (ACADSD)	AAGCCTGGGACTGTGTCTGTCGCCC<A>TGGCCGCCGCGCTGCTCGCCCGGGC	G	From A to G																									xCas9 NG on 24 SpCas9-NG NG on 24
rs1799958	ACADS	35	pathogenic.conflicting-interpretations-of-pathogenicity.benign	Deficiency of butyryl-CoA dehydrogenase (ACADSD)	GAAAACCACCCGCCTCTCCTTTCAG<G>GCATCAGTGCCTTCCTGGTCCCCAT	A	From G to A			EQR SpCas9 NGAG on 23	VQR SpCas9 NGAN on 23											SpCas9-NRRH NRRH on 22
rs147442301	ACADS	35	likely-pathogenic	Deficiency of butyryl-CoA dehydrogenase (ACADSD)	GACTTTGCCGAGAAGGAGTTGTTTC<C>CATTGCAGCCCAGGTGGATAAGGAA	T	From C to T			EQR SpCas9 comp. NGAG on 23	VQR SpCas9 comp. NGAN on 23
rs387906950	ACADS	35	likely-pathogenic	Deficiency of butyryl-CoA dehydrogenase (ACADSD)	CTCTGACTGTACCCCCATGTTTAGG<A>GGCAGCCATGGCCAAGCTGGCCGCC	G	From A to G	SpCas9 NGG on 23																							SpCas9-NRRH NGGN on 23 SpCas9-NRTH NGGN on 23 SpCas9-NRCH NGGN on 23 SpCas9-NRRH NGGN on 24 SpCas9-NRTH NGGN on 24 SpCas9-NRCH NGGN on 24	xCas9 NG on 24 SpCas9-NG NG on 24		St3Cas9 NGGNG on 23
rs796051902	ACADS	35	likely-pathogenic		TCCCCACAGCAAACCCTGGACATGG<G>CCGCATCGGCATCGCCTCCCAGGCC	T	From G to T				VQR SpCas9 comp. NGAN on 23		KKH SaCas9 NNNRRT on 20				CjCas9 NNNVRYM on 20 CjCas9 comp. NNNVRYM on 21					SpCas9-NRRH NRRH on 22 SpCas9-NRRH comp. NRRH on 23	SpCas9-NRCH comp. NRCH on 24		AsCas12a RR TYCV on 25								SpCas9-NRTH NRTH on 23
rs28940872	ACADS	35	likely-pathogenic.pathogenic	Deficiency of butyryl-CoA dehydrogenase (ACADSD)	AGAGATGCCGGCAGAGCGGCACTAC<C>GCGACGCCCGCATCACTGAGATCTA	T	From C to T										CjCas9 comp. NNNVRYM on 19						SpCas9-NRCH comp. NRCH on 22
rs202124189	ACADS	35	pathogenic.uncertain-significance	Deficiency of butyryl-CoA dehydrogenase (ACADSD)	GCCGGCAGAGCGGCACTACCGCGAC<G>CCCGCATCACTGAGATCTACGAGGG	T	From G to T			EQR SpCas9 comp. NGAG on 23	VQR SpCas9 comp. NGAN on 23	SaCas9 comp. NNGRRT on 22	KKH SaCas9 comp. NNNRRT on 22									SpCas9-NRRH comp. NRRH on 24	SpCas9-NRCH NRCH on 22		AsCas12a RR TYCV on 25
rs752677472_0	ACADS	35	likely-pathogenic		GAAGTTTGGCTCCAAGGAGCAGAAG<C>AGGCGTGGGTCACGCCTTTCACCAG	G	From C to G	SpCas9 NGG on 23		EQR SpCas9 NGAG on 24	VQR SpCas9 NGAN on 24								SpCas9-NG NANG on 22			SpCas9-NRRH NRRH on 23									SpCas9-NRRH NGGN on 23 SpCas9-NRTH NGGN on 23	xCas9 NG on 24 SpCas9-NG NG on 24		St3Cas9 NGGNG on 23
rs752677472_1	ACADS	35	likely-pathogenic	Deficiency of butyryl-CoA dehydrogenase (ACADSD)	GAAGTTTGGCTCCAAGGAGCAGAAG<C>AGGCGTGGGTCACGCCTTTCACCAG	T	From C to T						KKH SaCas9 NNNRRT on 20																				SpCas9-NRTH NRTH on 23
rs749491616	ACADS	35	pathogenic.likely-pathogenic		CCCCGCTGTCCTCCTAGTCTCTCTA<C>CTGGGGCCCATCTTGAAGTTTGGCT	T	From C to T				VQR SpCas9 comp. NGAN on 23											SpCas9-NRRH comp. NRRH on 22		AsCas12a RVR TATV on 23									SpCas9-NRTH NRTH on 23
rs539219309	ACADS	35	likely-pathogenic.uncertain-significance	Deficiency of butyryl-CoA dehydrogenase (ACADSD)	CCCACAGCAAACCCTGGACATGGGC<C>GCATCGGCATCGCCTCCCAGGCCCT	T	From C to T																SpCas9-NRCH comp. NRCH on 22
rs149107232_0	ACADS	35	likely-pathogenic	Deficiency of butyryl-CoA dehydrogenase (ACADSD)	GCTCCAAGGAGCAGAAGCAGGCGTG<G>GTCACGCCTTTCACCAGTGGTGACA	A	From G to A			EQR SpCas9 NGAG on 23	VQR SpCas9 NGAN on 23									SpCas9 (From Strep. past.) NNGTGA on 20
rs149107232_1	ACADS	35	likely-pathogenic		GCTCCAAGGAGCAGAAGCAGGCGTG<G>GTCACGCCTTTCACCAGTGGTGACA	C	From G to C		VRER SpCas9 NGCG on 23								CjCas9 comp. NNNVRYM on 21		SpCas9-NG comp. NANG on 22				SpCas9-NRCH comp. NRCH on 24									xCas9 comp. NG on 24 SpCas9-NG comp. NG on 24
rs57443665	ACADS	35	pathogenic-likely-pathogenic.pathogenic	Deficiency of butyryl-CoA dehydrogenase (ACADSD)	CACCGCCCGGGCCGAGGGCGACTCA<T>GGGTTCTGAATGGAACCAAAGCCTG	C	From T to C													SpCas9 (From Strep. past.) comp. NNGTGA on 23												xCas9 comp. NG on 24 SpCas9-NG comp. NG on 24
rs1001298373	ACADS	35	likely-pathogenic		CTCGATTACCTGGCCTACGCCATCG<C>CATGGAGGAGATCAGCCGTGGCTGC	T	From C to T				VQR SpCas9 comp. NGAN on 23																						SpCas9-NRTH NRTH on 23
rs140853839	ACADS	35	pathogenic	Deficiency of butyryl-CoA dehydrogenase (ACADSD)	GGAGAGTGCCCGGCTGCTGACCTGG<C>GCGCTGCCATGCTGAAGGATAACAA	T	From C to T						KKH SaCas9 NNNRRT on 20				CjCas9 comp. NNNVRYM on 19						SpCas9-NRCH comp. NRCH on 22
rs537072819	ACADS	35	likely-pathogenic.uncertain-significance	Deficiency of butyryl-CoA dehydrogenase (ACADSD)	GGCAGAGCGGCACTACCGCGACGCC<C>GCATCACTGAGATCTACGAGGGCAC	T	From C to T																SpCas9-NRCH comp. NRCH on 22
rs796051905	ACADS	35	pathogenic.uncertain-significance	Deficiency of butyryl-CoA dehydrogenase (ACADSD)	GCCATCCAGATCCTGGGCGGCATGG<G>CTACGTGACAGAGATGCCGGCAGAG	T	From G to T				VQR SpCas9 comp. NGAN on 23		KKH SaCas9 NNNRRT on 20				CjCas9 NNNVRYM on 20 CjCas9 comp. NNNVRYM on 21					SpCas9-NRRH NRRH on 22 SpCas9-NRRH comp. NRRH on 23	SpCas9-NRCH comp. NRCH on 24										SpCas9-NRTH NRTH on 23
rs368469075	ACADS	35	pathogenic.likely-pathogenic	Deficiency of butyryl-CoA dehydrogenase (ACADSD)	CACTGTTCTCATCTCAGGCCATCCA<G>ATCCTGGGCGGCATGGGCTACGTGA	T	From G to T										CjCas9 NNNVRYM on 20		SpCas9-NG comp. NANG on 24					AsCas12a RVR TATV on 25 AsCas12a RVR comp. TATV on 24									SpCas9-NRTH NRTH on 23
rs760791287	ACADSB	36	pathogenic		GAAATCAGTAATACAAGGATTATTT<C>AACAAGGGGTACATTTCATAATTCT	T	From C to T											LbCas12a & AsCas12a TTTV on 23										FnCas12a TTV on 24	enAsCas12a TTTT on 22
rs137852649	ACADSB	36	pathogenic	Deficiency of 2-methylbutyryl-CoA dehydrogenase (ACADSB)	AGGGAAACCTGAAAACAAATTGGGG<C>TCAGAGCTTCTTCCACCTGCCCGTT	T	From C to T					SaCas9 NNGRRT on 20	KKH SaCas9 NNNRRT on 20									SpCas9-NRRH comp. NRRH on 22			AsCas12a RR TYCV on 25		enAsCas12a VTTV on 24	FnCas12a TTV on 25		enAsCas12a TTCN on 25 Cas12e (CasX) TTCN on 25			SpCas9-NRTH NRTH on 23
rs142095937	ACADSB	36	likely-pathogenic		GGGGAGTAGGCTACACCAAAGATTA<C>CCTGTGGAGAAATACTTCCGAGATG	G	From C to G										CjCas9 NNNVRYM on 21					SpCas9-NRRH NRRH on 23 SpCas9-NRRH comp. NRRH on 22	SpCas9-NRCH NRCH on 24 SpCas9-NRCH comp. NRCH on 23									xCas9 NG on 24 SpCas9-NG NG on 24
rs58639322	ACADSB	36	likely-pathogenic.uncertain-significance	Deficiency of 2-methylbutyryl-CoA dehydrogenase (ACADSB)	GAGATCCAGAACACATTAATTAACA<C>ACTGATTAGAAAACATGGAACAGAA	T	From C to T										CjCas9 comp. NNNVRYM on 19							AsCas12a RVR comp. TATV on 24									SpCas9-NRTH NRTH on 23 SpCas9-NRTH comp. NRTH on 22
rs1131691808	ACADVL	37	likely-pathogenic		CATGACCTTGGCGTGGGCATTACCC<T>GGGGGCCCATCAGAGCATCGGTTTC	C	From T to C																								SpCas9-NRRH comp. NGGN on 24 SpCas9-NRTH comp. NGGN on 24 SpCas9-NRCH comp. NGGN on 24	xCas9 comp. NG on 24 SpCas9-NG comp. NG on 24		St3Cas9 comp. NGGNG on 24
rs1085307648	ACADVL	37	uncertain-significance.likely-pathogenic	Very long chain acyl-CoA dehydrogenase deficiency (VLCAD)	CTCTATGCCATGGTGGTGGTTCTCT<C>GAGGTGAGGAGGCAGGCAGGGAATG	T	From C to T																				enAsCas12a VTTV on 23	FnCas12a TTV on 24
rs113994170	ACADVL	37	likely-pathogenic	Very long chain acyl-CoA dehydrogenase deficiency (VLCAD)	CTTTGAGGGGACAAATGACATTCTT<C>GGCTGTTTGTGGCTCTGCAGGGCTG	T	From C to T											LbCas12a & AsCas12a TTTV on 23										FnCas12a TTV on 24
rs398123080	ACADVL	37	likely-pathogenic	Very long chain acyl-CoA dehydrogenase deficiency (VLCAD)	GATCATGCCACTAATCGTACCCAGT<T>TGGGGAGAAAATTCACAACTTTGGG	C	From T to C				VQR SpCas9 comp. NGAN on 24						CjCas9 NNNVRYM on 19															xCas9 comp. NG on 24 SpCas9-NG comp. NG on 24
rs934797393	ACADVL	37	uncertain-significance.likely-pathogenic	Very long chain acyl-CoA dehydrogenase deficiency (VLCAD)	GTTGCCATGCACATCCTCAACAATG<G>AAGGTTTGGCATGGCTGCGGCCCTG	T	From G to T																SpCas9-NRCH comp. NRCH on 24			enAsCas12a TGTV on 23							SpCas9-NRTH NRTH on 23
rs138058572	ACADVL	37	likely-pathogenic	Muscular Diseases. Rhabdomyolysis	GAACCTGGAGTAGAGCGTGTGCTCC<G>AGATCTTCGCATCTTCCGGATCTTT	A	From G to A																				enAsCas12a comp. VTTV on 23	FnCas12a comp. TTV on 24
rs727503788_0	ACADVL	37	pathogenic	Very long chain acyl-CoA dehydrogenase deficiency (VLCAD)	CACTGAACCCCCACTCCCCACAGCT<C>GCGGCTCACGGCGCTCCTGGGGCAG	A	From C to A															SpCas9-NRRH NRRH on 24	SpCas9-NRCH comp. NRCH on 22
rs727503788_1	ACADVL	37	pathogenic		CACTGAACCCCCACTCCCCACAGCT<C>GCGGCTCACGGCGCTCCTGGGGCAG	T	From C to T										CjCas9 comp. NNNVRYM on 19						SpCas9-NRCH comp. NRCH on 22				enAsCas12a VTTV on 23	FnCas12a TTV on 24
rs727503788_2	ACADVL	37	pathogenic		CACTGAACCCCCACTCCCCACAGCT<C>GCGGCTCACGGCGCTCCTGGGGCAG	G	From C to G	SpCas9 NGG on 24									CjCas9 comp. NNNVRYM on 19					SpCas9-NRRH NRRH on 24	SpCas9-NRCH comp. NRCH on 22								SpCas9-NRRH NGGN on 24 SpCas9-NRTH NGGN on 24 SpCas9-NRCH NGGN on 24	xCas9 NG on 24 SpCas9-NG NG on 24		St3Cas9 NGGNG on 24
rs200771970	ACADVL	37	uncertain-significance.likely-pathogenic	Very long chain acyl-CoA dehydrogenase deficiency (VLCAD)	GGAGAGGCAGGCAAACAGCTGAGGC<G>GTAGGCTTAGGGCCAGAGCCAGGGG	A	From G to A										CjCas9 NNNVRYM on 19						SpCas9-NRCH NRCH on 22
rs779901247_0	ACADVL	37	likely-pathogenic	Very long chain acyl-CoA dehydrogenase deficiency (VLCAD)	TCCCTTTGGGAATGCTGGCCTCCTG<C>TAGGAGAGGCAGGCAAACAGCTGAG	G	From C to G	SpCas9 NGG on 23					KKH SaCas9 NNNRRT on 21				CjCas9 NNNVRYM on 21					SpCas9-NRRH NRRH on 23	SpCas9-NRCH comp. NRCH on 23								SpCas9-NRRH NGGN on 23 SpCas9-NRTH NGGN on 23	xCas9 NG on 24 SpCas9-NG NG on 24	SpCas9-NRTH NRTH on 24
rs779901247_1	ACADVL	37	likely-pathogenic		TCCCTTTGGGAATGCTGGCCTCCTG<C>TAGGAGAGGCAGGCAAACAGCTGAG	T	From C to T																				enAsCas12a VTTV on 24	FnCas12a TTV on 25					SpCas9-NRTH NRTH on 23
rs201676770	ACADVL	37	uncertain-significance.likely-pathogenic	Very long chain acyl-CoA dehydrogenase deficiency (VLCAD)	GTGTTCTTTGATGGAGTACGGGTGC<C>ATCGGAGAACGTGCTGGGTGAGGTT	T	From C to T										CjCas9 comp. NNNVRYM on 19							AsCas12a RVR TATV on 25									SpCas9-NRTH comp. NRTH on 22
rs727503791	ACADVL	37	conflicting-interpretations-of-pathogenicity.pathogenic.uncertain-significance	Very long chain acyl-CoA dehydrogenase deficiency (VLCAD)	CCTTGGCGTGGGCATTACCCTGGGG<G>CCCATCAGAGCATCGGTTTCAAAGG	A	From G to A				VQR SpCas9 NGAN on 23	SaCas9 comp. NNGRRT on 20	KKH SaCas9 comp. NNNRRT on 20									SpCas9-NRRH NRRH on 22			AsCas12a RR comp. TYCV on 25								SpCas9-NRTH comp. NRTH on 23
rs118204015	ACADVL	37	pathogenic	Very long chain acyl-CoA dehydrogenase deficiency (VLCAD)	TCACAACTTTGGGCTGATCCAGGAG<A>AGCTGGCACGGATGGTTATGCTGCA	C	From A to C										CjCas9 NNNVRYM on 20						SpCas9-NRCH NRCH on 23 SpCas9-NRCH comp. NRCH on 24									xCas9 comp. NG on 24 SpCas9-NG comp. NG on 24
rs1057523504	ACADVL	37	likely-pathogenic		ACAACTTTGGGCTGATCCAGGAGAA<G>CTGGCACGGATGGTTATGCTGCAGT	C	From G to C	SpCas9 comp. NGG on 23					KKH SaCas9 comp. NNNRRT on 21				CjCas9 NNNVRYM on 20		SpCas9-NG comp. NANG on 22			SpCas9-NRRH NRRH on 22 SpCas9-NRRH comp. NRRH on 23	SpCas9-NRCH NRCH on 23								SpCas9-NRRH comp. NGGN on 23 SpCas9-NRTH comp. NGGN on 23	xCas9 comp. NG on 24 SpCas9-NG comp. NG on 24	SpCas9-NRTH comp. NRTH on 24
rs796051908	ACADVL	37	uncertain-significance.likely-pathogenic	Very long chain acyl-CoA dehydrogenase deficiency (VLCAD)	AGATTCCTGCTTCCCCTCCAGTACG<C>CCGTTTGGTGGAGATCGTGGGCATG	T	From C to T				VQR SpCas9 comp. NGAN on 23											SpCas9-NRRH comp. NRRH on 22			AsCas12a RR TYCV on 25								SpCas9-NRTH NRTH on 23
rs786204738	ACADVL	37	likely-pathogenic	Very long chain acyl-CoA dehydrogenase deficiency (VLCAD)	CAAGGAGCTGGGGGCCTTTGGTCTG<C>AAGTGCCCAGTGAGCTGGGTGGTGT	T	From C to T																			enAsCas12a TGTV on 23							SpCas9-NRTH NRTH on 23
rs1057520088	ACADVL	37	pathogenic	Very long chain acyl-CoA dehydrogenase deficiency (VLCAD)	CCAGGAAGTGAACGATCCCGCCAAG<A>ATGACGCTCTGGAGATGGTGGAGGA	G	From A to G	SpCas9 NGG on 23			VQR SpCas9 NGAN on 24						CjCas9 comp. NNNVRYM on 19		SpCas9-NG NANG on 22												SpCas9-NRTH NGGN on 23 SpCas9-NRCH NGGN on 23	xCas9 NG on 24 SpCas9-NG NG on 24
rs533055438	ACADVL	37	pathogenic.uncertain-significance	Very long chain acyl-CoA dehydrogenase deficiency (VLCAD)	GATGAATGCATCCAAATCATGGGGG<G>TATGGGCTTCATGAAGGTACAGGAC	A	From G to A				VQR SpCas9 NGAN on 23											SpCas9-NRRH NRRH on 22		AsCas12a RVR comp. TATV on 23	AsCas12a RR comp. TYCV on 25								SpCas9-NRTH comp. NRTH on 23
rs545215807	ACADVL	37	pathogenic.likely-pathogenic		TACCCTGGGGGCCCATCAGAGCATC<G>GTTTCAAAGGCATCCTGCTCTTTGG	T	From G to T															SpCas9-NRRH comp. NRRH on 24
rs138834083	ACADVL	37	likely-pathogenic.uncertain-significance	Very long chain acyl-CoA dehydrogenase deficiency (VLCAD)	CTCATCTGTTCTTTGTCCCTAGGAG<G>CAGCCTGGAAGGTGACAGATGAATG	A	From G to A				VQR SpCas9 NGAN on 23											SpCas9-NRRH NRRH on 22				enAsCas12a comp. TGTV on 23							SpCas9-NRTH comp. NRTH on 23
rs118204014	ACADVL	37	likely-pathogenic.pathogenic	Very long chain acyl-CoA dehydrogenase deficiency (VLCAD)	CCTTCCCTCTCCCCAGGCTGCAGCT<C>GGATCCGAGAGGGCATGGCCGCCCT	T	From C to T																				enAsCas12a VTTV on 23	FnCas12a TTV on 24
rs118204017	ACADVL	37	pathogenic	Very long chain acyl-CoA dehydrogenase deficiency (VLCAD)	GCGTGTGCTCCGAGATCTTCGCATC<T>TCCGGATCTTTGAGGGGACAAATGA	C	From T to C			EQR SpCas9 comp. NGAG on 22		SaCas9 comp. NNGRRT on 23																			SpCas9-NRTH comp. NGGN on 24 SpCas9-NRCH comp. NGGN on 24	xCas9 comp. NG on 24 SpCas9-NG comp. NG on 24		St3Cas9 comp. NGGNG on 21
rs149467828_0	ACADVL	37	likely-pathogenic	Very long chain acyl-CoA dehydrogenase deficiency (VLCAD)	TTCTTTGATGGAGTACGGGTGCCAT<C>GGAGAACGTGCTGGGTGAGGTTGGG	A	From C to A												SpCas9-NG NANG on 24					AsCas12a RVR comp. TATV on 25
rs149467828_1	ACADVL	37	likely-pathogenic		TTCTTTGATGGAGTACGGGTGCCAT<C>GGAGAACGTGCTGGGTGAGGTTGGG	T	From C to T																				enAsCas12a VTTV on 23	FnCas12a TTV on 24
rs371407903	ACADVL	37	likely-pathogenic	Very long chain acyl-CoA dehydrogenase deficiency (VLCAD)	GCACAAAGGCCCAGAAAGAAAAATA<C>CTCCCCAAGCTGGCATCTGGTGAGG	G	From C to G															SpCas9-NRRH NRRH on 23 SpCas9-NRRH comp. NRRH on 22	SpCas9-NRCH NRCH on 24 SpCas9-NRCH comp. NRCH on 23									xCas9 NG on 24 SpCas9-NG NG on 24
rs112406105	ACADVL	37	likely-pathogenic.pathogenic		TTCCAGGTAGATCATGCCACTAATC<G>TACCCAGTTTGGGGAGAAAATTCAC	C	From G to C	SpCas9 comp. NGG on 24				SaCas9 comp. NNGRRT on 23										SpCas9-NRRH comp. NRRH on 24									SpCas9-NRRH comp. NGGN on 24 SpCas9-NRTH comp. NGGN on 24 SpCas9-NRCH comp. NGGN on 24	xCas9 comp. NG on 24 SpCas9-NG comp. NG on 24
rs200366828	ACADVL	37	likely-pathogenic		CTTCGCATCTTCCGGATCTTTGAGG<G>GACAAATGACATTCTTCGGCTGTTT	A	From G to A			EQR SpCas9 NGAG on 23	VQR SpCas9 NGAN on 23											SpCas9-NRRH NRRH on 22
rs771874163	ACADVL	37	pathogenic.uncertain-significance	Very long chain acyl-CoA dehydrogenase deficiency (VLCAD)	CTTCCAGGTAGATCATGCCACTAAT<C>GTACCCAGTTTGGGGAGAAAATTCA	T	From C to T																SpCas9-NRCH comp. NRCH on 22			enAsCas12a TGTV on 25	enAsCas12a VTTV on 23	FnCas12a TTV on 24
rs1220348903	ACADVL	37	uncertain-significance.likely-pathogenic	Very long chain acyl-CoA dehydrogenase deficiency (VLCAD)	GGTTTCAAAGGCATCCTGCTCTTTG<G>CACAAAGGCCCAGAAAGAAAAATAC	A	From G to A				VQR SpCas9 NGAN on 23															enAsCas12a comp. TGTV on 23							SpCas9-NRTH comp. NRTH on 23
rs200573371	ACADVL	37	uncertain-significance.pathogenic	Very long chain acyl-CoA dehydrogenase deficiency (VLCAD)	TTTCCCACACTGCCCTGACACAGTG<G>GCCCCCTGAGAAGAAGATGGGCATC	A	From G to A			EQR SpCas9 NGAG on 23	VQR SpCas9 NGAN on 23									SpCas9 (From Strep. past.) NNGTGA on 20
rs118204018	ACADVL	37	uncertain-significance.pathogenic	Very long chain acyl-CoA dehydrogenase deficiency (VLCAD)	AGCCACGGACTTCCAGATAGAGGCC<G>CCATCAGCAAAATCTTTGGCTCGGT	T	From G to T			EQR SpCas9 comp. NGAG on 23	VQR SpCas9 comp. NGAN on 23								SpCas9-NG comp. NANG on 24						AsCas12a RR TYCV on 25
rs794727112	ACADVL	37	uncertain-significance.likely-pathogenic	Very long chain acyl-CoA dehydrogenase deficiency (VLCAD)	GTAGAGCGTGTGCTCCGAGATCTTC<G>CATCTTCCGGATCTTTGAGGGGACA	A	From G to A													SpCas9 (From Strep. past.) comp. NNGTGA on 22						enAsCas12a comp. TGTV on 23
rs369560930	ACADVL	37	likely-pathogenic.pathogenic-likely-pathogenic		GATCGTGGGCATGCATGACCTTGGC<G>TGGGCATTACCCTGGGGGCCCATCA	T	From G to T															SpCas9-NRRH comp. NRRH on 24	SpCas9-NRCH NRCH on 22				enAsCas12a VTTV on 24	FnCas12a TTV on 25
rs398123091	ACADVL	37	uncertain-significance.likely-pathogenic		TTTCTGTCTAACCGAGCCCTCAAGC<G>GGTCAGATGCAGCCTCCATCCGAAC	C	From G to C	SpCas9 comp. NGG on 24									CjCas9 NNNVRYM on 19					SpCas9-NRRH comp. NRRH on 24	SpCas9-NRCH NRCH on 22								SpCas9-NRRH comp. NGGN on 24 SpCas9-NRTH comp. NGGN on 24 SpCas9-NRCH comp. NGGN on 24	xCas9 comp. NG on 24 SpCas9-NG comp. NG on 24
rs113994167	ACADVL	37	pathogenic	Very long chain acyl-CoA dehydrogenase deficiency (VLCAD)	GTGAAGGAGAAGATCACAGCTTTTG<T>GGTGGAGAGGGGCTTCGGGGGCATT	C	From T to C		VRER SpCas9 NGCG on 23																							xCas9 comp. NG on 24 SpCas9-NG comp. NG on 24
rs1064793382	ACADVL	37	likely-pathogenic		GCCATGCACATCCTCAACAATGGAA<G>GTTTGGCATGGCTGCGGCCCTGGCA	C	From G to C												SpCas9-NG comp. NANG on 22			SpCas9-NRRH NRRH on 22										xCas9 comp. NG on 24 SpCas9-NG comp. NG on 24	SpCas9-NRTH comp. NRTH on 24
rs956279629	ACADVL	37	likely-pathogenic		TTCAAGGTTGCCATGCACATCCTCA<A>CAATGGAAGGTTTGGCATGGCTGCG	G	From A to G																SpCas9-NRCH comp. NRCH on 23									xCas9 NG on 24 SpCas9-NG NG on 24
rs2309689	ACADVL	37	pathogenic		TGCATCCAAATCATGGGGGGTATGG<G>CTTCATGAAGGTACAGGACGGTCTT	C	From G to C	SpCas9 comp. NGG on 23									CjCas9 NNNVRYM on 20 CjCas9 comp. NNNVRYM on 21		SpCas9-NG comp. NANG on 22			SpCas9-NRRH NRRH on 22 SpCas9-NRRH comp. NRRH on 23	SpCas9-NRCH NRCH on 23 SpCas9-NRCH comp. NRCH on 24								SpCas9-NRRH comp. NGGN on 23 SpCas9-NRTH comp. NGGN on 23	xCas9 comp. NG on 24 SpCas9-NG comp. NG on 24
rs768236474	ACADVL	37	likely-pathogenic	Very long chain acyl-CoA dehydrogenase deficiency (VLCAD)	GCGGCGCCCGGAGAGATTCGGAGAT<G>CAGGCGGCTCGGATGGCCGCGAGCT	A	From G to A										CjCas9 NNNVRYM on 19							AsCas12a RVR comp. TATV on 25		enAsCas12a comp. TGTV on 23							SpCas9-NRTH NRTH on 22 SpCas9-NRTH comp. NRTH on 23
rs387906253	ACADVL	37	pathogenic.uncertain-significance	Very long chain acyl-CoA dehydrogenase deficiency (VLCAD)	AAAATACTATACCCTCAATGGAAGC<A>AGCTTTGGATCAGGCAACCTGCCTC	C	From A to C	SpCas9 comp. NGG on 24														SpCas9-NRRH comp. NRRH on 24									SpCas9-NRRH comp. NGGN on 24 SpCas9-NRTH comp. NGGN on 24 SpCas9-NRCH comp. NGGN on 24	xCas9 comp. NG on 24 SpCas9-NG comp. NG on 24
rs267604368	ACAN	176	likely-pathogenic		TACTTTAATCACTTCTGAGTTCGTG<G>AGGGTGTTACTGAACCAACTATTTC	A	From G to A				VQR SpCas9 NGAN on 23									SpCas9 (From Strep. past.) NNGTGA on 20							enAsCas12a comp. VTTV on 23	FnCas12a comp. TTV on 24		enAsCas12a comp. TTCN on 24 Cas12e (CasX) comp. TTCN on 24
rs121913568	ACAN	176	pathogenic	Spondyloepimetaphyseal dysplasia. Aggrecan type (SEMDAG)	AGACTACCAGTGGATCGGCCTGAAC<G>ACAGGACCATCGAAGGGGACTTCCG	A	From G to A										CjCas9 NNNVRYM on 19						SpCas9-NRCH NRCH on 22				enAsCas12a comp. VTTV on 23	FnCas12a comp. TTV on 24
rs371065660	ACAN	176	likely-pathogenic		CGCTACACCCTCGACTTTGACAGGG<C>GCAGCGGGCCTGCCTGCAGAACAGT	T	From C to T					SaCas9 NNGRRT on 20	KKH SaCas9 NNNRRT on 20										SpCas9-NRCH comp. NRCH on 22
rs267606625	ACAN	176	pathogenic	Osteochondritis dissecans (SSOAOD)	CTTTTTTGCCGCTGGAGAGGACTGT<G>TGGTGATGATCTGGCACGAGAAGGG	A	From G to A																	AsCas12a RVR TATV on 24									SpCas9-NRTH NRTH on 22 SpCas9-NRTH comp. NRTH on 23
rs773948197	ACAN	176	likely-pathogenic		GCCTGACATGGAGCTGCCACTGCCT<C>GAAACATCACTGAGGGTGAAGCCCG	G	From C to G	SpCas9 NGG on 24							St1Cas9 NNRGAAW on 23							SpCas9-NRRH NRRH on 24			AsCas12a RR comp. TYCV on 23						SpCas9-NRRH NGGN on 24 SpCas9-NRTH NGGN on 24 SpCas9-NRCH NGGN on 24	xCas9 NG on 24 SpCas9-NG NG on 24
rs120074141	ACAT1	38	pathogenic	Deficiency of acetyl-CoA acetyltransferase	GCTTGAAGATTTGATTGTAAAAGAC<G>GGCTAACTGATGTCTACAATAAAAT	A	From G to A										CjCas9 NNNVRYM on 19						SpCas9-NRCH NRCH on 22			enAsCas12a comp. TGTV on 25
rs869312946	ACAT1	38	pathogenic	Inborn genetic diseases	TCAACCAGATGTAGTGGTGAAAGAA<G>ATGAAGAATATAAACGTGTTGATTT	A	From G to A								St1Cas9 NNRGAAW on 19			LbCas12a & AsCas12a comp. TTTV on 25				SpCas9-NRRH NRRH on 22							enAsCas12a comp. TTTT on 24
rs762991875	ACAT1	38	likely-pathogenic		GCGCAGGATGTGATGGTGGCAGGTG<G>GATGGAGAGCATGTCCAATGTTCCA	C	From G to C		VRER SpCas9 NGCG on 23								CjCas9 comp. NNNVRYM on 21						SpCas9-NRCH comp. NRCH on 24									xCas9 comp. NG on 24 SpCas9-NG comp. NG on 24
rs120074144_0	ACAT1	38	pathogenic		AGTTCCAAAGCTGAAGACAGTTTTC<C>AGAAAGAAAATGGTTAGTGTTAAGA	G	From C to G			EQR SpCas9 NGAG on 24	VQR SpCas9 NGAN on 24																					xCas9 NG on 24 SpCas9-NG NG on 24
rs879255505	ACAT1	38	likely-pathogenic	Deficiency of acetyl-CoA acetyltransferase	GAACAGGACGCTTATGCTATTAATT<C>TTATACCAGAAGTAAAGCAGCATGG	T	From C to T											LbCas12a & AsCas12a TTTV on 25				SpCas9-NRRH comp. NRRH on 22							enAsCas12a TTTT on 23 enAsCas12a TTTT on 24
rs886041122	ACAT1	38	pathogenic		GGAGCAGCTGCTCTGGTTCTCATGA<C>GGCAGATGCAGCGAAGAGGCTCAAT	T	From C to T						KKH SaCas9 NNNRRT on 20
rs120074146	ACAT1	38	pathogenic		CTCAATGTTACACCACTGGCAAGAA<T>AGTAGGTAAGGCCAGGCGAGGTGGC	G	From T to G			EQR SpCas9 NGAG on 24	VQR SpCas9 NGAN on 24	SaCas9 NNGRRT on 23							SpCas9-NG NANG on 22			SpCas9-NRRH NRRH on 23										xCas9 NG on 24 SpCas9-NG NG on 24
rs120074148	ACAT1	38	pathogenic	Deficiency of acetyl-CoA acetyltransferase	CTCTCAAAGTCTTATGTGTGGACAT<C>AGGTAAGAAACACCGTCCTTCCCAT	G	From C to G			EQR SpCas9 NGAG on 24	VQR SpCas9 NGAN on 24								SpCas9-NG NANG on 22													xCas9 NG on 24 SpCas9-NG NG on 24
rs120074143	ACAT1	38	pathogenic	Deficiency of acetyl-CoA acetyltransferase	CCCCAAAAAGTGAATATCAATGGAG<G>AGCTGTTTCTCTGGGACATCCAATT	T	From G to T					SaCas9 NNGRRT on 20	KKH SaCas9 NNNRRT on 20				CjCas9 NNNVRYM on 20					SpCas9-NRRH NRRH on 22	SpCas9-NRCH comp. NRCH on 24										SpCas9-NRTH NRTH on 23
rs794727475	ACAT1	38	likely-pathogenic		TCCTTGCTGCCAGCCACTAAGCTTG<G>TTCCATTGCAATTCAGGGAGCCATT	T	From G to T								St1Cas9 comp. NNRGAAW on 19		CjCas9 comp. NNNVRYM on 21	LbCas12a & AsCas12a TTTV on 25				SpCas9-NRRH comp. NRRH on 23	SpCas9-NRCH comp. NRCH on 24										SpCas9-NRTH NRTH on 23
rs120074140	ACAT1	38	pathogenic	Deficiency of acetyl-CoA acetyltransferase	CCAAAAAGTGAATATCAATGGAGGA<G>CTGTTTCTCTGGGACATCCAATTGG	A	From G to A						KKH SaCas9 comp. NNNRRT on 20									SpCas9-NRRH NRRH on 22			AsCas12a RR comp. TYCV on 25		enAsCas12a comp. VTTV on 24	FnCas12a comp. TTV on 25		enAsCas12a comp. TTCN on 25 Cas12e (CasX) comp. TTCN on 25			SpCas9-NRTH comp. NRTH on 23
rs120074142	ACAT1	38	pathogenic	Deficiency of acetyl-CoA acetyltransferase	GCCGATACTCAGCCCTCTGCGACCA<T>GGCTGTGCTGGCGGCACTTCTGCGC	A	From T to A												SpCas9-NG NANG on 24								enAsCas12a comp. VTTV on 24	FnCas12a comp. TTV on 25
rs532190594_0	ACAT1	38	pathogenic		TACAGCAAAGAAGCTGAATATTGCA<C>GAAATGAACAGGACGCTTATGCTAT	A	From C to A								St1Cas9 NNRGAAW on 23							SpCas9-NRRH NRRH on 24					enAsCas12a comp. VTTV on 24	FnCas12a comp. TTV on 25
rs120074145	ACAT1	38	pathogenic	Deficiency of acetyl-CoA acetyltransferase	GAAGTGAAAGAAGCATACATGGGTA<A>TGTTCTACAAGGAGGTGAAGGACAA	G	From A to G																SpCas9-NRCH comp. NRCH on 23									xCas9 NG on 24 SpCas9-NG NG on 24
rs148639841	ACAT1	38	pathogenic	Deficiency of acetyl-CoA acetyltransferase	GGCAGGTGGGATGGAGAGCATGTCC<A>ATGTTCCATATGTAATGAACAGAGG	G	From A to G				VQR SpCas9 NGAN on 24						CjCas9 comp. NNNVRYM on 19															xCas9 NG on 24 SpCas9-NG NG on 24
rs761086326	ACAT1	38	likely-pathogenic	Deficiency of acetyl-CoA acetyltransferase	GCCAGGATTGTTGGTCATTTGACTC<A>TGCCTTGAAGCAAGGAGAATACGGT	G	From A to G																									xCas9 NG on 24 SpCas9-NG NG on 24
rs748303093	ACAT1	38	pathogenic.likely-pathogenic	Deficiency of acetyl-CoA acetyltransferase	GGAGCTGTTTCTCTGGGACATCCAA<T>TGGGTAGGTAAAAATAATAACTATA	C	From T to C																SpCas9-NRCH NRCH on 23									xCas9 comp. NG on 24 SpCas9-NG comp. NG on 24
rs120074147	ACAT1	38	pathogenic	Deficiency of acetyl-CoA acetyltransferase	TTTTCCAATTGCTCCTGTATATGCT<G>CATCTATGGTGAGAACAAAGTGAGG	C	From G to C	SpCas9 comp. NGG on 23		EQR SpCas9 comp. NGAG on 24	VQR SpCas9 comp. NGAN on 24											SpCas9-NRRH comp. NRRH on 23			AsCas12a RR TYCV on 24						SpCas9-NRRH comp. NGGN on 23 SpCas9-NRTH comp. NGGN on 23	xCas9 comp. NG on 24 SpCas9-NG comp. NG on 24		St3Cas9 comp. NGGNG on 23
rs201441120	ACD	65057	pathogenic	Dyskeratosis congenita. autosomal recessive 7 (DKCB7). Dyskeratosis congenita. autosomal dominant 6 (DKCA6)	GACACCATACCCCTTTCAGGAACCC<C>CAAAGAGGCATCGTGATGGTTCTGC	A	From C to A										CjCas9 NNNVRYM on 21						SpCas9-NRCH NRCH on 24			enAsCas12a comp. TGTV on 23
rs1357918249	ACE	1636	likely-pathogenic		CCGATACGGAGACAGATACATCAAC<C>TCAGGGGACCCATCCCTGCTCATCT	T	From C to T															SpCas9-NRRH comp. NRRH on 22			AsCas12a RR TYCV on 25		enAsCas12a VTTV on 24	FnCas12a TTV on 25		enAsCas12a TTCN on 25 Cas12e (CasX) TTCN on 25
rs121912704_0	ACE	1636	pathogenic	Renal dysplasia (RTD)	TCCGCCGCGCACTGCATCGCCGATA<C>GGAGACAGATACATCAACCTCAGGG	G	From C to G	SpCas9 NGG on 24																							SpCas9-NRRH NGGN on 24 SpCas9-NRTH NGGN on 24 SpCas9-NRCH NGGN on 24	xCas9 NG on 24 SpCas9-NG NG on 24
rs121912704_1	ACE	1636	pathogenic		TCCGCCGCGCACTGCATCGCCGATA<C>GGAGACAGATACATCAACCTCAGGG	T	From C to T																	AsCas12a RVR TATV on 23
rs397514688	ACE	1636	pathogenic	Renal dysplasia (RTD)	CTACAACTTCGACTGGTGGTATCTT<C>GGTGAGAGGAGGGATAGAAAAGCCT	T	From C to T											LbCas12a & AsCas12a TTTV on 23										FnCas12a TTV on 24
rs779422412	ACE	1636	pathogenic		TGCCAACCTGCCCCTGGCTAAGCGG<C>AGCAGGTGGGCTGAGGGCTGAGGCA	T	From C to T						KKH SaCas9 NNNRRT on 20																				SpCas9-NRTH NRTH on 23
rs397514689	ACE	1636	pathogenic	Renal dysplasia (RTD)	CCTGTTATGGGCATGGGAGGGCTGG<C>GAGACAAGGCGGGGAGAGCCATCCT	T	From C to T						KKH SaCas9 NNNRRT on 20							SpCas9 (From Strep. past.) NNGTGA on 22
rs34599082	ACKR1	2532	pathogenic	DUFFY BLOOD GROUP SYSTEM. FY(bwk) PHENOTYPE	CTTCATGCTTTTCAGACCTCTCTTC<C>GCTGGCAGCTCTGCCCTGGCTGGCC	T	From C to T										CjCas9 comp. NNNVRYM on 19						SpCas9-NRCH comp. NRCH on 22
rs869312927	ACO2	50	likely-pathogenic	Inborn genetic diseases	AGCTCCTGGAGCCTTTTGACAAGTG<G>GATGGCAAGGACCTGGAGGACCTGC	C	From G to C		VRER SpCas9 NGCG on 23								CjCas9 comp. NNNVRYM on 21						SpCas9-NRCH comp. NRCH on 24									xCas9 comp. NG on 24 SpCas9-NG comp. NG on 24
rs863223881	ACO2	50	likely-pathogenic		ACCACTGACCACATCTCAGCTGCTG<G>CCCCTGGCTCAAGTTCCGTGGGCAC	A	From G to A				VQR SpCas9 NGAN on 23	SaCas9 comp. NNGRRT on 20	KKH SaCas9 comp. NNNRRT on 20																				SpCas9-NRTH comp. NRTH on 23
rs761368190	ACO2	50	likely-pathogenic	Inborn genetic diseases	ACCAATTCAAGCTATGAAGATATGG<G>GCGCTCAGCAGCTGTGGCCAAGCAG	A	From G to A			EQR SpCas9 NGAG on 23	VQR SpCas9 NGAN on 23											SpCas9-NRRH NRRH on 22			AsCas12a RR comp. TYCV on 25
rs786200924	ACO2	50	pathogenic	Infantile cerebellar-retinal degeneration (ICRD)	AGATGGCCATGCTCCAGTTCATCAG<C>AGCGGGCTGTCCAAGGTGGCTGTGC	G	From C to G	SpCas9 NGG on 23		EQR SpCas9 NGAG on 24	VQR SpCas9 NGAN on 24								SpCas9-NG NANG on 22			SpCas9-NRRH NRRH on 23									SpCas9-NRRH NGGN on 23 SpCas9-NRTH NGGN on 23	xCas9 NG on 24 SpCas9-NG NG on 24		St3Cas9 NGGNG on 23
rs141772938	ACO2	50	uncertain-significance.pathogenic	Optic atrophy 9 (OPA9). Infantile cerebellar-retinal degeneration (ICRD). Optic atrophy 9 (OPA9)	CTCGGAGAAGATTGTGTATGGACAC<C>TGGATGACCCCGCCAGCCAGGAAAT	G	From C to G												SpCas9-NG NANG on 22													xCas9 NG on 24 SpCas9-NG NG on 24
rs864309499	ACO2	50	likely-pathogenic	Infantile cerebellar-retinal degeneration (ICRD)	AGCTGCTGGCCCCTGGCTCAAGTTC<C>GTGGGCACTTGGATAACATCTCCAA	T	From C to T										CjCas9 comp. NNNVRYM on 19						SpCas9-NRCH comp. NRCH on 22			enAsCas12a TGTV on 25
rs786204829	ACO2	50	pathogenic	Infantile cerebellar-retinal degeneration (ICRD)	GCCTGAAGGACTTCACCCCTGGCAA<G>GTTAGGGGCCCGGGTCCCCCTGAGG	C	From G to C												SpCas9-NG comp. NANG on 22			SpCas9-NRRH NRRH on 22										xCas9 comp. NG on 24 SpCas9-NG comp. NG on 24	SpCas9-NRTH comp. NRTH on 24
rs150129663	ACO2	50	likely-pathogenic	Inborn genetic diseases	ATTCAAGGATCACTTGGTGCCTGAC<C>CTGGCTGCCATTATGACCAACTAAT	T	From C to T			EQR SpCas9 comp. NGAG on 23	VQR SpCas9 comp. NGAN on 23											SpCas9-NRRH comp. NRRH on 22
rs1131691759	ACO2	50	pathogenic		CTACAGCCTACTGGTGACTCGGCTG<C>AGGTGAGCGAGCTCAGGGACCTCTG	T	From C to T																			enAsCas12a TGTV on 23							SpCas9-NRTH NRTH on 23
rs786204828	ACO2	50	pathogenic	Infantile cerebellar-retinal degeneration (ICRD)	GTGGCAGGCATCCTCACGGTGAAAG<G>TGGCACAGGTGCAATCGTGGAATAC	A	From G to A				VQR SpCas9 NGAN on 23											SpCas9-NRRH NRRH on 22											SpCas9-NRTH comp. NRTH on 23
rs77814755	ACOT4	122970	likely-pathogenic	Intellectual disability	GGCTTTGCCACGTTGGCTCTAGCTT<A>TTATAACTTTGAAGATCTCCCCAAT	G	From A to G																SpCas9-NRCH comp. NRCH on 23									xCas9 NG on 24 SpCas9-NG NG on 24
rs74553611	ACOT4	122970	likely-pathogenic	Intellectual disability	ATGGCTTTGCCACGTTGGCTCTAGC<T>TATTATAACTTTGAAGATCTCCCCA	A	From T to A										CjCas9 NNNVRYM on 19 CjCas9 NNNVRYM on 21							AsCas12a RVR comp. TATV on 23									SpCas9-NRTH NRTH on 24
rs77261428	ACOT4	122970	likely-pathogenic		CATGGCTTTGCCACGTTGGCTCTAG<C>TTATTATAACTTTGAAGATCTCCCC	T	From C to T						KKH SaCas9 NNNRRT on 20					LbCas12a & AsCas12a TTTV on 25				SpCas9-NRRH comp. NRRH on 22											SpCas9-NRTH NRTH on 23
rs777937235	ACOX1	51	likely-pathogenic	Pseudoneonatal adrenoleukodystrophy	TTGAACTTCCTCACTCGCAGCCAGC<G>TTATGAGGTGGCTGTCAGGAAAAGT	C	From G to C	SpCas9 comp. NGG on 24									CjCas9 NNNVRYM on 19		SpCas9-NG comp. NANG on 22			SpCas9-NRRH comp. NRRH on 24	SpCas9-NRCH NRCH on 22								SpCas9-NRRH comp. NGGN on 24 SpCas9-NRTH comp. NGGN on 24 SpCas9-NRCH comp. NGGN on 24	xCas9 comp. NG on 24 SpCas9-NG comp. NG on 24
rs118204091	ACOX1	51	likely-pathogenic.pathogenic	Pseudoneonatal adrenoleukodystrophy	TGTGACCTCCATTAAATGGTGGCCT<G>GTGGGCGTAAGTGAATTTTTCAGCA	T	From G to T												SpCas9-NG comp. NANG on 24							enAsCas12a TGTV on 25	enAsCas12a VTTV on 23	FnCas12a TTV on 24
rs118204090	ACOX1	51	pathogenic	Pseudoneonatal adrenoleukodystrophy	GAGTAACAAGCTGACTTACGGGACC<A>TGGTGTTTGTCAGGTCCTTCCTTGT	G	From A to G																									xCas9 NG on 24 SpCas9-NG NG on 24
rs118204092	ACOX1	51	pathogenic	Pseudoneonatal adrenoleukodystrophy	ATCCGATACAGCGCTGTGAGGCACC<A>GTCTGAAATCAAGCCAGGGTAAGGA	G	From A to G										CjCas9 comp. NNNVRYM on 19														SpCas9-NRTH NGGN on 24 SpCas9-NRCH NGGN on 24	xCas9 NG on 24 SpCas9-NG NG on 24
rs118204093	ACOX1	51	pathogenic	Pseudoneonatal adrenoleukodystrophy	ATTTATCTCCTTAGGAACTCACCTT<C>GAGGCTTGGAAACCACAGCCACGTA	T	From C to T											LbCas12a & AsCas12a TTTV on 23										FnCas12a TTV on 24
rs1057519329	ACOX2	8309	pathogenic	Bile acid synthesis defect. congenital. 6 (CBAS6)	CGGAGTTTAGCTGTAAGGACAATTA<T>TTCATGACCCAGAATGAGCGTTATA	A	From T to A					SaCas9 comp. NNGRRT on 20	KKH SaCas9 NNNRRT on 21 KKH SaCas9 comp. NNNRRT on 20									SpCas9-NRRH NRRH on 23					enAsCas12a VTTV on 25 enAsCas12a comp. VTTV on 24	FnCas12a comp. TTV on 25					SpCas9-NRTH NRTH on 24 SpCas9-NRTH comp. NRTH on 23
rs767907487	ACP4	93650	pathogenic	Amelogenesis imperfecta. type IJ (AI1J)	CCTTGCCGGGCTGTTTCCCGAGGCT<G>CTCCAGGGAGCCCCGAGGCCCGCTG	C	From G to C	SpCas9 comp. NGG on 23		EQR SpCas9 comp. NGAG on 24	VQR SpCas9 comp. NGAN on 24								SpCas9-NG comp. NANG on 22			SpCas9-NRRH comp. NRRH on 23									SpCas9-NRRH comp. NGGN on 23 SpCas9-NRTH comp. NGGN on 23	xCas9 comp. NG on 24 SpCas9-NG comp. NG on 24		St3Cas9 comp. NGGNG on 23
rs1057519277	ACP4	93650	pathogenic	Amelogenesis imperfecta. type IJ (AI1J)	GCTGTTCTGTCCCCAGGAGGGGGTC<C>GCCAGCAGCTGGAGCTGGGCCGCTT	T	From C to T										CjCas9 comp. NNNVRYM on 19						SpCas9-NRCH comp. NRCH on 22
rs779823931	ACP4	93650	pathogenic	Amelogenesis imperfecta. type IJ (AI1J)	TCCCGAGGCTGCTCCAGGGAGCCCC<G>AGGCCCGCTGGAGGCCGATCCCGGT	A	From G to A																				enAsCas12a comp. VTTV on 23	FnCas12a comp. TTV on 24
rs763573828	ACP4	93650	pathogenic	Amelogenesis imperfecta. type IJ (AI1J)	GTCCTGCGGACTCTTGCCCAGATCT<C>GGCTTTGGATATTGGAGCCCACGTG	T	From C to T																				enAsCas12a VTTV on 23	FnCas12a TTV on 24
rs202073531	ACP4	93650	pathogenic	Amelogenesis imperfecta. type IJ (AI1J)	GTACATCCGCAGCACGGACTTTGAC<C>GCACGCTGGAGAGTGCCCAGGCCAA	T	From C to T																SpCas9-NRCH comp. NRCH on 22
rs1085307111	ACP4	93650	pathogenic	Amelogenesis imperfecta. type IJ (AI1J)	GATATTGGAGCCCACGTGGGCCCAC<C>CCGGGCAGCAGAGAAGGCCCAGCTG	T	From C to T			EQR SpCas9 comp. NGAG on 23	VQR SpCas9 comp. NGAN on 23											SpCas9-NRRH comp. NRRH on 22			AsCas12a RR TYCV on 25
rs387906668	ACP5	54	pathogenic	Spondyloenchondrodysplasia with immune dysregulation (SPENCDI)	TGCCCTATCTGTTTGCTACAGGAGA<C>CTTTGAGGACGTATTCTCTGACCGC	T	From C to T				VQR SpCas9 comp. NGAN on 23		KKH SaCas9 NNNRRT on 20									SpCas9-NRRH comp. NRRH on 22											SpCas9-NRTH NRTH on 23
rs387906669	ACP5	54	pathogenic	Spondyloenchondrodysplasia with immune dysregulation (SPENCDI)	CGGGCCTACCCACTGCCTGGTCAAG<C>AGCTACGGCCACTGCTGGCCACATA	T	From C to T						KKH SaCas9 NNNRRT on 20																				SpCas9-NRTH NRTH on 23
rs761798208	ACP5	54	pathogenic	Spondyloenchondrodysplasia with immune dysregulation (SPENCDI)	GACCCCTTGTCCTCCATCCTCAGTA<C>CTGCAAGATGAGAATGGCGTGGGCT	A	From C to A						KKH SaCas9 comp. NNNRRT on 20									SpCas9-NRRH NRRH on 23 SpCas9-NRRH comp. NRRH on 22	SpCas9-NRCH NRCH on 24				enAsCas12a comp. VTTV on 24	FnCas12a comp. TTV on 25					SpCas9-NRTH comp. NRTH on 23
rs781199182	ACP5	54	pathogenic	Spondyloenchondrodysplasia with immune dysregulation (SPENCDI)	CCCCGTGTGGTCCATAGCCGAGCAC<G>GGCCTACCCACTGCCTGGTCAAGCA	A	From G to A										CjCas9 NNNVRYM on 19						SpCas9-NRCH NRCH on 22			enAsCas12a comp. TGTV on 25
rs387906672	ACP5	54	pathogenic	Spondyloenchondrodysplasia with immune dysregulation (SPENCDI)	GCGGCGGCCAGGGAGGACTACGTGC<T>GGTGGCTGGCCACTACCCCGTGTGG	C	From T to C																								SpCas9-NRTH comp. NGGN on 24 SpCas9-NRCH comp. NGGN on 24	xCas9 comp. NG on 24 SpCas9-NG comp. NG on 24
rs387906670	ACP5	54	pathogenic		GTGCTGAGTGGGGCTGGGAATTTCA<T>GGACCCCTCAAAGCGGCACCAGCGC	C	From T to C													SpCas9 (From Strep. past.) comp. NNGTGA on 23												xCas9 comp. NG on 24 SpCas9-NG comp. NG on 24
rs144959805	ACP6	51205	likely-pathogenic		CATGTTTGCTGGGCAGCTGACCAAG<G>TGGGCATGCAGCAAATGTTTGCCTT	T	From G to T						KKH SaCas9 NNNRRT on 20									SpCas9-NRRH NRRH on 22 SpCas9-NRRH comp. NRRH on 23	SpCas9-NRCH comp. NRCH on 24				enAsCas12a VTTV on 24	FnCas12a TTV on 25					SpCas9-NRTH NRTH on 23
rs370382601	ACSF3	197322	pathogenic		TCCAGCTCGGCCGCCTGTCAGTGCA<A>TGCTGCCCCATGTGGTGCTCACCTT	G	From A to G																SpCas9-NRCH comp. NRCH on 23									xCas9 NG on 24 SpCas9-NG NG on 24
rs140986055	ACSF3	197322	pathogenic	Combined malonic and methylmalonic aciduria (CMAMMA)	GACGACGTGATCCTCCACGTGCTCC<C>GCTGCACCACGTCCATGGTGTGGTC	T	From C to T										CjCas9 comp. NNNVRYM on 19						SpCas9-NRCH comp. NRCH on 22
rs387907120	ACSF3	197322	pathogenic	Combined malonic and methylmalonic aciduria (CMAMMA)	ACCCTGCTGGAGCGGTATGGCATGA<C>CGAGATCGGCATGGCTCTGTCCGGG	T	From C to T				VQR SpCas9 comp. NGAN on 23		KKH SaCas9 NNNRRT on 20																				SpCas9-NRTH NRTH on 23
rs201954387	ACSF3	197322	pathogenic		TGTCCCACAGGGAGCTCAAAGAGTG<G>GCCAGGTAGGGCTGGGTGGGGCGGG	A	From G to A			EQR SpCas9 NGAG on 23	VQR SpCas9 NGAN on 23									SpCas9 (From Strep. past.) NNGTGA on 20
rs761573352	ACSF3	197322	pathogenic		AGAGCAGGGATGGAGGAACAAGGGC<G>CCATGATCATCTACACCAGTGGGAC	A	From G to A						KKH SaCas9 comp. NNNRRT on 20				CjCas9 NNNVRYM on 19						SpCas9-NRCH NRCH on 22
rs150487794	ACSF3	197322	uncertain-significance.pathogenic	Combined malonic and methylmalonic aciduria (CMAMMA)	CCTGCTGGAGCGGTATGGCATGACC<G>AGATCGGCATGGCTCTGTCCGGGCC	A	From G to A																				enAsCas12a comp. VTTV on 23	FnCas12a comp. TTV on 24
rs387907121	ACSF3	197322	pathogenic	Combined malonic and methylmalonic aciduria (CMAMMA)	CAGGGATGGAGGAACAAGGGCGCCA<T>GATCATCTACACCAGTGGGACCACG	G	From T to G	SpCas9 NGG on 24				SaCas9 NNGRRT on 23										SpCas9-NRRH NRRH on 24									SpCas9-NRRH NGGN on 24 SpCas9-NRTH NGGN on 24 SpCas9-NRCH NGGN on 24	xCas9 NG on 24 SpCas9-NG NG on 24
rs202182978_0	ACSF3	197322	likely-pathogenic		GCTGCCCCATGTGGTGCTCACCTTC<C>GGCGCCTGGGCTGCGCCTTGGCGTC	A	From C to A												SpCas9-NG NANG on 24
rs1131691498	ACSF3	197322	likely-pathogenic		CTGCCCCTCCCAGTGCTGGAGAAGT<G>GAAGAACATCACGGGCCACACCCTG	A	From G to A										CjCas9 NNNVRYM on 19																SpCas9-NRTH NRTH on 22
rs752104014	ACSF3	197322	likely-pathogenic		CCACAAGTGGGCATGGACCAAAGAC<G>ACGTGATCCTCCACGTGCTCCCGCT	A	From G to A										CjCas9 NNNVRYM on 19						SpCas9-NRCH NRCH on 22			enAsCas12a comp. TGTV on 25	enAsCas12a comp. VTTV on 23	FnCas12a comp. TTV on 24
rs122458138	ACSL4	2182	pathogenic	Mental retardation 63. X-linked (MRX63)	TAACATTCTTTATGACTTAACAGAT<C>GTAAGAAAGATCTAGTGAAGTTACA	A	From C to A						KKH SaCas9 NNNRRT on 22									SpCas9-NRRH NRRH on 24	SpCas9-NRCH comp. NRCH on 22	AsCas12a RVR comp. TATV on 25
rs1057518493	ACTA1	58	likely-pathogenic		GCTGTCTTGCAGATCATCGCCCCGC<C>GGAGCGCAAATACTCGGTGTGGATC	A	From C to A												SpCas9-NG NANG on 24
rs886039557	ACTA1	58	pathogenic		CGTGGCCATCCAGGCCGTGCTGTCC<C>TCTACGCCTCCGGCAGGACCACCGG	T	From C to T															SpCas9-NRRH comp. NRRH on 22					enAsCas12a VTTV on 24	FnCas12a TTV on 25		enAsCas12a TTCN on 25 Cas12e (CasX) TTCN on 25
rs1057521117	ACTA1	58	pathogenic	Nemaline myopathy 3 (NEM3). ACTA1 gene related myopathy	GGAAAAGAGCTACGAGCTGCCAGAC<G>GGCAGGTCATCACCATCGGCAACGA	C	From G to C	SpCas9 comp. NGG on 24					KKH SaCas9 comp. NNNRRT on 22				CjCas9 NNNVRYM on 19					SpCas9-NRRH comp. NRRH on 24	SpCas9-NRCH NRCH on 22								SpCas9-NRRH comp. NGGN on 24 SpCas9-NRTH comp. NGGN on 24 SpCas9-NRCH comp. NGGN on 24	xCas9 comp. NG on 24 SpCas9-NG comp. NG on 24
rs1057519311	ACTA1	58	likely-pathogenic.uncertain-significance	Nemaline myopathy 3 (NEM3)	CCCATTTATGAGGGCTACGCGCTGC<C>GCACGCCATCATGCGCCTGGACCTG	T	From C to T																SpCas9-NRCH comp. NRCH on 22
rs878854374	ACTA1	58	likely-pathogenic	Nemaline myopathy 3 (NEM3)	GTCATGTCGGGGGGCACCACGATGT<A>CCCTGGGATCGCTGACCGCATGCAG	G	From A to G										CjCas9 comp. NNNVRYM on 22						SpCas9-NRCH comp. NRCH on 23									xCas9 NG on 24 SpCas9-NG NG on 24
rs768144106	ACTA1	58	likely-pathogenic		TCTCTCCCGCGCGCGCACAGGCATC<G>TGCTGGACTCCGGCGACGGCGTCAC	T	From G to T															SpCas9-NRRH comp. NRRH on 24					enAsCas12a VTTV on 24	FnCas12a TTV on 25
rs587777354	ACTA1	58	pathogenic		CGCTGTCCACCTTCCAGCAGATGTG<G>ATCACCAAGCAGGAGTACGACGAGG	T	From G to T																SpCas9-NRCH comp. NRCH on 24	AsCas12a RVR TATV on 25		enAsCas12a TGTV on 23							SpCas9-NRTH NRTH on 23
rs121909525	ACTA1	58	pathogenic.likely-pathogenic	Nemaline myopathy 3 (NEM3)	GACGCTCTTCCAGCCCTCCTTCATC<G>GTGAGCCCCGCTCGCCCTCGCCCCG	T	From G to T															SpCas9-NRRH comp. NRRH on 24				enAsCas12a TGTV on 25
rs367543049	ACTA1	58	pathogenic	Congenital myopathy with fiber type disproportion (CFTD)	TCGGCTCTGCAGGGCGTCATGGTCG<G>TATGGGTCAGAAAGATTCCTACGTG	A	From G to A				VQR SpCas9 NGAN on 23													AsCas12a RVR comp. TATV on 23									SpCas9-NRTH comp. NRTH on 23
rs1057521119	ACTA1	58	likely-pathogenic		GCGTGGCTACTCCTTCGTGACCACA<G>GTGCGCGGCGCCCCTGCACCCCGGG	A	From G to A																				enAsCas12a comp. VTTV on 24	FnCas12a comp. TTV on 25
rs587780272	ACTA1	58	pathogenic	Nemaline myopathy 3. autosomal dominant or recessive	AACGTGCCCATTTATGAGGGCTACG<C>GCTGCCGCACGCCATCATGCGCCTG	A	From C to A			EQR SpCas9 NGAG on 23	VQR SpCas9 NGAN on 23											SpCas9-NRRH NRRH on 24	SpCas9-NRCH comp. NRCH on 22
rs367543048	ACTA1	58	pathogenic		ACTAGACACAATGTGCGACGAAGAC<G>AGACCACCGCCCTCGTGTGCGACAA	T	From G to T						KKH SaCas9 comp. NNNRRT on 22									SpCas9-NRRH comp. NRRH on 24	SpCas9-NRCH NRCH on 22
rs1064794652	ACTA1	58	likely-pathogenic	Nemaline myopathy 3 (NEM3)	AGGCATCGTGCTGGACTCCGGCGAC<G>GCGTCACCCACAACGTGCCCATTTA	A	From G to A										CjCas9 NNNVRYM on 19						SpCas9-NRCH NRCH on 22			enAsCas12a comp. TGTV on 25
rs121909520	ACTA1	58	pathogenic	Nemaline myopathy 3 (NEM3)	GAGGCCCCCCTCAATCCCAAGGCCA<A>CCGCGAGAAGATGACCCAGATCATG	G	From A to G																SpCas9-NRCH comp. NRCH on 23									xCas9 NG on 24 SpCas9-NG NG on 24
rs121909521	ACTA1	58	pathogenic	Myopathy. actin. congenital. with excess of thin myofilaments	CGCCCTCGTGTGCGACAATGGCTCC<G>GCCTGGTGAAAGCCGGCTTCGCCGG	C	From G to C	SpCas9 comp. NGG on 24	VRER SpCas9 comp. NGCG on 22																						SpCas9-NRRH comp. NGGN on 24 SpCas9-NRTH comp. NGGN on 24 SpCas9-NRCH comp. NGGN on 24	xCas9 comp. NG on 24 SpCas9-NG comp. NG on 24		St3Cas9 comp. NGGNG on 21
rs367543050	ACTA1	58	pathogenic	Congenital myopathy with fiber type disproportion (CFTD)	TCCTGCTTCTGCCCTCCGCAGCTGA<G>CGCGAGATCGTGCGCGACATCAAGG	C	From G to C	SpCas9 comp. NGG on 23					KKH SaCas9 comp. NNNRRT on 21				CjCas9 NNNVRYM on 20 CjCas9 comp. NNNVRYM on 21					SpCas9-NRRH NRRH on 22 SpCas9-NRRH comp. NRRH on 23	SpCas9-NRCH NRCH on 23								SpCas9-NRRH comp. NGGN on 23 SpCas9-NRTH comp. NGGN on 23	xCas9 comp. NG on 24 SpCas9-NG comp. NG on 24	SpCas9-NRTH comp. NRTH on 24
rs121909531	ACTA1	58	pathogenic	Congenital myopathy with fiber type disproportion (CFTD)	ACGCGCTGTCTTGCAGATCATCGCC<C>CGCCGGAGCGCAAATACTCGGTGTG	T	From C to T			EQR SpCas9 comp. NGAG on 23	VQR SpCas9 comp. NGAN on 23
rs121909523	ACTA1	58	pathogenic	Nemaline myopathy 3 (NEM3)	GGCAACGAGCGCTTCCGCTGCCCGG<A>GACGCTCTTCCAGCCCTCCTTCATC	T	From A to T						KKH SaCas9 NNNRRT on 20				CjCas9 comp. NNNVRYM on 21			SpCas9 (From Strep. past.) NNGTGA on 22			SpCas9-NRCH comp. NRCH on 24
rs267606627	ACTA1	58	pathogenic		CCTGACCCTGAAGTACCCTATCGAG<C>ACGGCATCATCACCAACTGGGATGA	A	From C to A				VQR SpCas9 NGAN on 23											SpCas9-NRRH NRRH on 23 SpCas9-NRRH NRRH on 24					enAsCas12a comp. VTTV on 23	FnCas12a comp. TTV on 24		enAsCas12a comp. TTCN on 24 Cas12e (CasX) comp. TTCN on 24			SpCas9-NRTH comp. NRTH on 22
rs1057521118	ACTA1	58	likely-pathogenic.uncertain-significance	Nemaline myopathy 3 (NEM3)	GCTGTGCTACGTGGCCCTGGACTTC<G>AGAACGAGATGGCGACGGCCGCCTC	C	From G to C	SpCas9 comp. NGG on 24														SpCas9-NRRH comp. NRRH on 24			AsCas12a RR TYCV on 23						SpCas9-NRRH comp. NGGN on 24 SpCas9-NRTH comp. NGGN on 24 SpCas9-NRCH comp. NGGN on 24	xCas9 comp. NG on 24 SpCas9-NG comp. NG on 24
rs121909519	ACTA1	58	pathogenic	Nemaline myopathy 3 (NEM3)	TGGCACCACACCTTCTACAACGAGC<T>TCGCGTGGCTCCCGAGGAGCACCCC	C	From T to C			EQR SpCas9 comp. NGAG on 22							CjCas9 NNNVRYM on 19														SpCas9-NRTH comp. NGGN on 24 SpCas9-NRCH comp. NGGN on 24	xCas9 comp. NG on 24 SpCas9-NG comp. NG on 24
rs121909522	ACTA1	58	pathogenic	Nemaline myopathy 3 (NEM3)	CTCCGGCGACGGCGTCACCCACAAC<G>TGCCCATTTATGAGGGCTACGCGCT	T	From G to T						KKH SaCas9 comp. NNNRRT on 22									SpCas9-NRRH comp. NRRH on 24	SpCas9-NRCH NRCH on 22				enAsCas12a VTTV on 24	FnCas12a TTV on 25
rs121909530	ACTA1	58	pathogenic	Congenital myopathy with fiber type disproportion (CFTD)	AAGGAGAAGCTGTGCTACGTGGCCC<T>GGACTTCGAGAACGAGATGGCGACG	C	From T to C																								SpCas9-NRRH comp. NGGN on 24 SpCas9-NRTH comp. NGGN on 24 SpCas9-NRCH comp. NGGN on 24	xCas9 comp. NG on 24 SpCas9-NG comp. NG on 24		St3Cas9 comp. NGGNG on 24
rs121909528	ACTA1	58	pathogenic		GTCTTGCAGATCATCGCCCCGCCGG<A>GCGCAAATACTCGGTGTGGATCGGC	G	From A to G	SpCas9 NGG on 23									CjCas9 comp. NNNVRYM on 19														SpCas9-NRRH NGGN on 23 SpCas9-NRTH NGGN on 23 SpCas9-NRCH NGGN on 23 SpCas9-NRTH NGGN on 24 SpCas9-NRCH NGGN on 24	xCas9 NG on 24 SpCas9-NG NG on 24		St3Cas9 NGGNG on 24
rs1131691728	ACTA1	58	pathogenic		AGGTATCCTGACCCTGAAGTACCCT<A>TCGAGCACGGCATCATCACCAACTG	G	From A to G																SpCas9-NRCH comp. NRCH on 23			enAsCas12a TGTV on 24						xCas9 NG on 24 SpCas9-NG NG on 24
rs121909529	ACTA1	58	pathogenic	Congenital myopathy with fiber type disproportion (CFTD)	AAGTGTGACATCGACATCAGGAAGG<A>CCTGTATGCCAACAACGTCATGTCG	T	From A to T				VQR SpCas9 comp. NGAN on 23		KKH SaCas9 NNNRRT on 20				CjCas9 NNNVRYM on 20 CjCas9 comp. NNNVRYM on 21					SpCas9-NRRH comp. NRRH on 23	SpCas9-NRCH comp. NRCH on 24										SpCas9-NRTH NRTH on 23
rs1064794287	ACTA1	58	pathogenic		CATCATGCGCCTGGACCTGGCGGGC<C>GCGATCTCACCGACTACCTGATGAA	A	From C to A															SpCas9-NRRH NRRH on 24	SpCas9-NRCH comp. NRCH on 22
rs121909524	ACTA1	58	pathogenic	Nemaline myopathy 3 (NEM3)	GCTGTCCACCTTCCAGCAGATGTGG<A>TCACCAAGCAGGAGTACGACGAGGC	C	From A to C			EQR SpCas9 comp. NGAG on 22							CjCas9 comp. NNNVRYM on 21					SpCas9-NRRH comp. NRRH on 23	SpCas9-NRCH NRCH on 23 SpCas9-NRCH comp. NRCH on 24									xCas9 comp. NG on 24 SpCas9-NG comp. NG on 24
rs727503797	ACTA1	58	likely-pathogenic	Nemaline myopathy 3 (NEM3)	TACGCGCTGCCGCACGCCATCATGC<G>CCTGGACCTGGCGGGCCGCGATCTC	T	From G to T			EQR SpCas9 comp. NGAG on 23	VQR SpCas9 comp. NGAN on 23											SpCas9-NRRH comp. NRRH on 24	SpCas9-NRCH NRCH on 22
rs398122936	ACTA1	58	pathogenic	Nemaline myopathy 3 (NEM3)	CCGCGCTGGCACCCAGCACCATGAA<G>ATCAAGGTGGGTGGTGGCCTGCGCG	C	From G to C										CjCas9 NNNVRYM on 20		SpCas9-NG comp. NANG on 22			SpCas9-NRRH NRRH on 22	SpCas9-NRCH NRCH on 23									xCas9 comp. NG on 24 SpCas9-NG comp. NG on 24	SpCas9-NRTH comp. NRTH on 24
rs1131691941	ACTA1	58	likely-pathogenic		GGTGCGTGGTGTCTCGGCTCTGCAG<G>GCGTCATGGTCGGTATGGGTCAGAA	T	From G to T						KKH SaCas9 NNNRRT on 20									SpCas9-NRRH NRRH on 22	SpCas9-NRCH comp. NRCH on 24
rs398123562	ACTA1	58	likely-pathogenic		GCGTGGTGTCTCGGCTCTGCAGGGC<G>TCATGGTCGGTATGGGTCAGAAAGA	A	From G to A						KKH SaCas9 comp. NNNRRT on 20				CjCas9 NNNVRYM on 19						SpCas9-NRCH NRCH on 22
rs869312739	ACTA1	58	pathogenic	Myopathy. scapulohumeroperoneal (SHPM)	ACTACCTGATGAAGATCCTCACTGA<G>CGTGGCTACTCCTTCGTGACCACAG	T	From G to T				VQR SpCas9 comp. NGAN on 23		KKH SaCas9 NNNRRT on 20 KKH SaCas9 comp. NNNRRT on 21				CjCas9 NNNVRYM on 20 CjCas9 comp. NNNVRYM on 21					SpCas9-NRRH NRRH on 22 SpCas9-NRRH comp. NRRH on 23											SpCas9-NRTH NRTH on 23 SpCas9-NRTH comp. NRTH on 24
rs1057521120	ACTA1	58	likely-pathogenic		GGTGTCTCGGCTCTGCAGGGCGTCA<T>GGTCGGTATGGGTCAGAAAGATTCC	C	From T to C													SpCas9 (From Strep. past.) comp. NNGTGA on 23												xCas9 comp. NG on 24 SpCas9-NG comp. NG on 24
rs886039302	ACTA1	58	likely-pathogenic		TCGAGCACGGCATCATCACCAACTG<G>GATGACATGGAGAAGATCTGGCACC	A	From G to A			EQR SpCas9 NGAG on 23	VQR SpCas9 NGAN on 23
rs398123563	ACTA1	58	likely-pathogenic.pathogenic		GGCCGTGCTGTCCCTCTACGCCTCC<G>GCAGGACCACCGGTGAGTGCCCGCT	C	From G to C	SpCas9 comp. NGG on 24	VRER SpCas9 comp. NGCG on 22																						SpCas9-NRRH comp. NGGN on 24 SpCas9-NRTH comp. NGGN on 24 SpCas9-NRCH comp. NGGN on 24	xCas9 comp. NG on 24 SpCas9-NG comp. NG on 24
rs371410845_0	ACTA1	58	pathogenic		CCATCCAGGCCGTGCTGTCCCTCTA<C>GCCTCCGGCAGGACCACCGGTGAGT	A	From C to A															SpCas9-NRRH NRRH on 24	SpCas9-NRCH comp. NRCH on 22				enAsCas12a comp. VTTV on 24	FnCas12a comp. TTV on 25
rs371410845_1	ACTA1	58	pathogenic		CCATCCAGGCCGTGCTGTCCCTCTA<C>GCCTCCGGCAGGACCACCGGTGAGT	T	From C to T										CjCas9 comp. NNNVRYM on 19						SpCas9-NRCH comp. NRCH on 22	AsCas12a RVR TATV on 23
rs267606626	ACTA1	58	pathogenic	Nemaline myopathy 3 (NEM3)	TCCTGACCCTGAAGTACCCTATCGA<G>CACGGCATCATCACCAACTGGGATG	T	From G to T				VQR SpCas9 comp. NGAN on 23		KKH SaCas9 NNNRRT on 20 KKH SaCas9 comp. NNNRRT on 21				CjCas9 NNNVRYM on 20 CjCas9 comp. NNNVRYM on 21			SpCas9 (From Strep. past.) comp. NNGTGA on 20		SpCas9-NRRH NRRH on 22 SpCas9-NRRH comp. NRRH on 23											SpCas9-NRTH NRTH on 23 SpCas9-NRTH comp. NRTH on 24
rs1085308014	ACTA1	58	likely-pathogenic		GGGTCAGAAAGATTCCTACGTGGGC<G>ACGAGGCTCAGAGCAAGAGAGGTAT	A	From G to A										CjCas9 NNNVRYM on 19						SpCas9-NRCH NRCH on 22				enAsCas12a comp. VTTV on 23	FnCas12a comp. TTV on 24
rs201823652_0	ACTA1	58	pathogenic	Nemaline myopathy 3 (NEM3)	GCGACATCAAGGAGAAGCTGTGCTA<C>GTGGCCCTGGACTTCGAGAACGAGA	A	From C to A						KKH SaCas9 NNNRRT on 22									SpCas9-NRRH NRRH on 24	SpCas9-NRCH comp. NRCH on 22				enAsCas12a comp. VTTV on 24	FnCas12a comp. TTV on 25
rs201823652_1	ACTA1	58	pathogenic		GCGACATCAAGGAGAAGCTGTGCTA<C>GTGGCCCTGGACTTCGAGAACGAGA	T	From C to T										CjCas9 comp. NNNVRYM on 19						SpCas9-NRCH comp. NRCH on 22	AsCas12a RVR TATV on 23		enAsCas12a TGTV on 25
rs121909526	ACTA1	58	pathogenic	Nemaline myopathy 3 (NEM3)	ACGTGCCCGCCATGTACGTGGCCAT<C>CAGGCCGTGCTGTCCCTCTACGCCT	G	From C to G												SpCas9-NG NANG on 22				SpCas9-NRCH NRCH on 24 SpCas9-NRCH comp. NRCH on 23									xCas9 NG on 24 SpCas9-NG NG on 24
rs121909527	ACTA1	58	pathogenic	Myopathy. actin. congenital. with cores	CTTGCAGAAACTAGACACAATGTGC<G>ACGAAGACGAGACCACCGCCCTCGT	T	From G to T															SpCas9-NRRH comp. NRRH on 24	SpCas9-NRCH NRCH on 22
rs367543051	ACTA1	58	pathogenic	Congenital myopathy with fiber type disproportion (CFTD)	CTCCTCCTCCCTGGAAAAGAGCTAC<G>AGCTGCCAGACGGGCAGGTCATCAC	A	From G to A																SpCas9-NRCH NRCH on 22			enAsCas12a comp. TGTV on 25	enAsCas12a comp. VTTV on 23	FnCas12a comp. TTV on 24
rs587780271	ACTA1	58	likely-pathogenic	Nemaline myopathy 3. autosomal dominant or recessive	AACGTGCCCGCCATGTACGTGGCCA<T>CCAGGCCGTGCTGTCCCTCTACGCC	A	From T to A						KKH SaCas9 comp. NNNRRT on 20				CjCas9 NNNVRYM on 21					SpCas9-NRRH NRRH on 23	SpCas9-NRCH NRCH on 24				enAsCas12a comp. VTTV on 24	FnCas12a comp. TTV on 25					SpCas9-NRTH comp. NRTH on 23
rs746972765	ACTA2	59	uncertain-significance.likely-pathogenic	Cardiovascular phenotype. Aortic aneurysm. familial thoracic 6 (AAT6)	TACCTCATGAAGATCCTGACTGAGC<G>TGGCTATTCCTTCGTTACTACTGGT	A	From G to A										CjCas9 NNNVRYM on 19						SpCas9-NRCH NRCH on 22
rs1064793016	ACTA2	59	likely-pathogenic		GACCCTGAAGTACCCGATAGAACAT<G>GCATCATCACCAACTGGGACGACAT	A	From G to A										CjCas9 NNNVRYM on 19							AsCas12a RVR comp. TATV on 25									SpCas9-NRTH NRTH on 22
rs397515325	ACTA2	59	pathogenic	Aortic aneurysm. familial thoracic 6 (AAT6)	ACCTTTTTAGGGGGTGATGGTGGGA<A>TGGGACAAAAAGACAGCTACGTGGG	G	From A to G			EQR SpCas9 NGAG on 22													SpCas9-NRCH comp. NRCH on 23									xCas9 NG on 24 SpCas9-NG NG on 24		St3Cas9 NGGNG on 21
rs112901682	ACTA2	59	pathogenic.uncertain-significance.likely-pathogenic	Aortic aneurysm. familial thoracic 6 (AAT6). Thoracic aortic aneurysm and aortic dissection (TAAD)	GGCTGTTTTCCCATCCATTGTGGGA<C>GTCCCAGACATCAGGTGAGGAAAAT	T	From C to T					SaCas9 NNGRRT on 20	KKH SaCas9 NNNRRT on 20				CjCas9 comp. NNNVRYM on 19						SpCas9-NRCH comp. NRCH on 22			enAsCas12a TGTV on 25
rs727502878	ACTA2	59	likely-pathogenic	Thoracic aortic aneurysm and aortic dissection (TAAD). Aortic aneurysm. familial thoracic 6 (AAT6)	CCGCATCCTCATCCTCCCTTGAGAA<G>AGTTACGAGTTGCCTGATGGGCAAG	C	From G to C										CjCas9 NNNVRYM on 20					SpCas9-NRRH NRRH on 22	SpCas9-NRCH NRCH on 23									xCas9 comp. NG on 24 SpCas9-NG comp. NG on 24	SpCas9-NRTH comp. NRTH on 24
rs886039303	ACTA2	59	pathogenic	Aortic aneurysm. familial thoracic 6 (AAT6)	CTATGCCTTGCCCCATGCCATCATG<C>GTCTGGATCTGGCTGGCCGAGATCT	T	From C to T										CjCas9 comp. NNNVRYM on 19						SpCas9-NRCH comp. NRCH on 22			enAsCas12a TGTV on 23 enAsCas12a TGTV on 25
rs121434526	ACTA2	59	pathogenic	Aortic aneurysm. familial thoracic 6 (AAT6). Thoracic aortic aneurysm and aortic dissection (TAAD). Aortic aneurysm. familial thoracic 2 (AAT2). Cardiovascular phenotype	GGTGCTGTCTCTCTATGCCTCTGGA<C>GCACAACTGGTAGGTGGCTGGGCGG	T	From C to T					SaCas9 NNGRRT on 20	KKH SaCas9 NNNRRT on 20										SpCas9-NRCH comp. NRCH on 22
rs794728019	ACTA2	59	pathogenic		AGAATCCTGTGAAGCAGCTCCAGCT<A>TGTGTGAAGAAGAGGACAGCACTGC	G	From A to G																SpCas9-NRCH comp. NRCH on 23			enAsCas12a TGTV on 24						xCas9 NG on 24 SpCas9-NG NG on 24
rs121434527	ACTA2	59	pathogenic	Aortic aneurysm. familial thoracic 6 (AAT6). Moyamoya disease 5 (MYMY5)	ATCACCATCGGAAATGAACGTTTCC<G>CTGCCCAGAGACCCTGTTCCAGCCA	A	From G to A						KKH SaCas9 comp. NNNRRT on 20
rs794728029	ACTA2	59	pathogenic		ACCATGGCCTGTGTCTCTTTTCCAG<G>GATGGAGTCTGCTGGCATCCATGAA	A	From G to A			EQR SpCas9 NGAG on 23	VQR SpCas9 NGAN on 23											SpCas9-NRRH NRRH on 22
rs869025352	ACTA2	59	likely-pathogenic.uncertain-significance	Thoracic aortic aneurysm and aortic dissection (TAAD)	CCTTTTTAGGGGGTGATGGTGGGAA<T>GGGACAAAAAGACAGCTACGTGGGT	A	From T to A											LbCas12a & AsCas12a comp. TTTV on 25	SpCas9-NG NANG on 24
rs794728025	ACTA2	59	likely-pathogenic.uncertain-significance	Cardiovascular phenotype	GTGCTGTCTCTCTATGCCTCTGGAC<G>CACAACTGGTAGGTGGCTGGGCGGG	A	From G to A										CjCas9 NNNVRYM on 19						SpCas9-NRCH NRCH on 22			enAsCas12a comp. TGTV on 23 enAsCas12a comp. TGTV on 25
rs794728021	ACTA2	59	likely-pathogenic.pathogenic.uncertain-significance	Aortic aneurysm. familial thoracic 6 (AAT6). Cardiovascular phenotype	GCTGTTTTCCCATCCATTGTGGGAC<G>TCCCAGACATCAGGTGAGGAAAATT	A	From G to A					SaCas9 comp. NNGRRT on 20	KKH SaCas9 comp. NNNRRT on 20				CjCas9 NNNVRYM on 19						SpCas9-NRCH NRCH on 22			enAsCas12a comp. TGTV on 25
rs121434528	ACTA2	59	pathogenic.likely-pathogenic	Aortic aneurysm. familial thoracic 6 (AAT6). Moyamoya disease 5 (MYMY5). Cardiovascular phenotype	GATCACCATCGGAAATGAACGTTTC<C>GCTGCCCAGAGACCCTGTTCCAGCC	T	From C to T										CjCas9 comp. NNNVRYM on 19						SpCas9-NRCH comp. NRCH on 22
rs387906592	ACTA2	59	pathogenic	Multisystemic smooth muscle dysfunction syndrome. Moyamoya disease 5 (MYMY5). Thoracic aortic aneurysm and aortic dissection (TAAD). Aortic aneurysm. familial thoracic 6 (AAT6). alterations of great arteries and veins. Connective tissue disorder. Cardiovascular phenotype. Aortic aneurysm. familial thoracic 6 (AAT6). Multisystemic smooth muscle dysfunction syndrome. Moyamoya disease 5 (MYMY5)	TATGCCTTGCCCCATGCCATCATGC<G>TCTGGATCTGGCTGGCCGAGATCTC	A	From G to A						KKH SaCas9 comp. NNNRRT on 20										SpCas9-NRCH NRCH on 22
rs397516683	ACTA2	59	uncertain-significance.likely-pathogenic	Thoracic aortic aneurysm and aortic dissection (TAAD)	CCAGCCATGTATGTGGCTATCCAGG<C>GGTGCTGTCTCTCTATGCCTCTGGA	T	From C to T						KKH SaCas9 NNNRRT on 20
rs886038978	ACTA2	59	pathogenic		CACTATGTACCCTGGCATTGCCGAC<C>GAATGCAGAAGGAGATCACGGCCCT	G	From C to G	SpCas9 NGG on 24							St1Cas9 NNRGAAW on 23				SpCas9-NG NANG on 22			SpCas9-NRRH NRRH on 24			AsCas12a RR comp. TYCV on 23						SpCas9-NRRH NGGN on 24 SpCas9-NRTH NGGN on 24 SpCas9-NRCH NGGN on 24	xCas9 NG on 24 SpCas9-NG NG on 24
rs281875334	ACTB	60	pathogenic	Baraitser-Winter syndrome 1 (BRWS1)	TACCTCATGAAGATCCTCACCGAGC<G>CGGCTACAGCTTCACCACCACGGCC	A	From G to A										CjCas9 NNNVRYM on 19						SpCas9-NRCH NRCH on 22
rs886041267	ACTB	60	likely-pathogenic		CTTCTTGTCCTTTCCTTCCCAGGGC<G>TGATGGTGGGCATGGGTCAGAAGGA	A	From G to A										CjCas9 NNNVRYM on 19						SpCas9-NRCH NRCH on 22
rs587779776	ACTB	60	pathogenic	Baraitser-Winter syndrome 1 (BRWS1)	CGCGGCTACAGCTTCACCACCACGG<C>CGAGCGGGAAATCGTGCGTGACATT	G	From C to G	SpCas9 NGG on 23	VRER SpCas9 NGCG on 24								CjCas9 comp. NNNVRYM on 20					SpCas9-NRRH NRRH on 23	SpCas9-NRCH comp. NRCH on 23								SpCas9-NRRH NGGN on 23 SpCas9-NRTH NGGN on 23	xCas9 NG on 24 SpCas9-NG NG on 24		St3Cas9 NGGNG on 23
rs769182426	ACTB	60	likely-pathogenic		ACATCCGCAAAGACCTGTACGCCAA<C>ACAGTGCTGTCTGGCGGCACCACCA	T	From C to T						KKH SaCas9 NNNRRT on 20																				SpCas9-NRTH NRTH on 23 SpCas9-NRTH comp. NRTH on 22
rs281875331	ACTB	60	pathogenic.not-provided	Baraitser-Winter syndrome 1 (BRWS1)	TGATATCGCCGCGCTCGTCGTCGAC<A>ACGGCTCCGGCATGTGCAAGGCCGG	G	From A to G				VQR SpCas9 NGAN on 24						CjCas9 comp. NNNVRYM on 19 CjCas9 comp. NNNVRYM on 22		SpCas9-NG NANG on 22													xCas9 NG on 24 SpCas9-NG NG on 24
rs765265404	ACTB	60	pathogenic		CCCTGAACCCCAAGGCCAACCGCGA<G>AAGATGACCCAGGTGAGTGGCCCGC	A	From G to A											LbCas12a & AsCas12a comp. TTTV on 24				SpCas9-NRRH NRRH on 22			AsCas12a RR comp. TYCV on 25			FnCas12a comp. TTV on 25	enAsCas12a comp. TTTT on 23	enAsCas12a comp. TTCN on 25 Cas12e (CasX) comp. TTCN on 25
rs1057517888	ACTB	60	likely-pathogenic		CATCATGAAGTGTGACGTGGACATC<C>GCAAAGACCTGTACGCCAACACAGT	T	From C to T																SpCas9-NRCH comp. NRCH on 22
rs587779770	ACTB	60	likely-pathogenic.pathogenic	Baraitser-Winter syndrome 1 (BRWS1)	CACCCTGAAGTACCCCATCGAGCAC<G>GCATCGTCACCAACTGGGACGACAT	A	From G to A										CjCas9 NNNVRYM on 19						SpCas9-NRCH NRCH on 22			enAsCas12a comp. TGTV on 25
rs886039472	ACTB	60	pathogenic.uncertain-significance	Inborn genetic diseases	TACAGCTTCACCACCACGGCCGAGC<G>GGAAATCGTGCGTGACATTAAGGAG	A	From G to A										CjCas9 NNNVRYM on 19						SpCas9-NRCH NRCH on 22
rs786205585	ACTB	60	likely-pathogenic		CCTCACCCTGAAGTACCCCATCGAG<C>ACGGCATCGTCACCAACTGGGACGA	G	From C to G	SpCas9 NGG on 23			VQR SpCas9 NGAN on 24						CjCas9 comp. NNNVRYM on 19		SpCas9-NG NANG on 22			SpCas9-NRRH NRRH on 23 SpCas9-NRRH NRRH on 24									SpCas9-NRRH NGGN on 23 SpCas9-NRTH NGGN on 23	xCas9 NG on 24 SpCas9-NG NG on 24	SpCas9-NRTH comp. NRTH on 22
rs1131691341	ACTB	60	likely-pathogenic		ATCCTCACCCTGAAGTACCCCATCG<A>GCACGGCATCGTCACCAACTGGGAC	G	From A to G	SpCas9 NGG on 23																							SpCas9-NRRH NGGN on 23 SpCas9-NRTH NGGN on 23 SpCas9-NRCH NGGN on 23 SpCas9-NRTH NGGN on 24 SpCas9-NRCH NGGN on 24	xCas9 NG on 24 SpCas9-NG NG on 24
rs587779774	ACTB	60	pathogenic	Baraitser-Winter syndrome 1 (BRWS1)	CCCAAGGCCAACCGCGAGAAGATGA<C>CCAGGTGAGTGGCCCGCTACCTCTT	T	From C to T				VQR SpCas9 comp. NGAN on 23		KKH SaCas9 NNNRRT on 20									SpCas9-NRRH comp. NRRH on 22			AsCas12a RR TYCV on 25								SpCas9-NRTH NRTH on 23
rs886041790	ACTB	60	likely-pathogenic		CTCCTGAGCGCAAGTACTCCGTGTG<G>ATCGGCGGCTCCATCCTGGCCTCGC	T	From G to T																SpCas9-NRCH comp. NRCH on 24	AsCas12a RVR TATV on 25		enAsCas12a TGTV on 23							SpCas9-NRTH NRTH on 23
rs587779771	ACTB	60	likely-pathogenic.pathogenic	Baraitser-Winter syndrome 1 (BRWS1)	CTGAAGTACCCCATCGAGCACGGCA<T>CGTCACCAACTGGGACGACATGGAG	C	From T to C	SpCas9 comp. NGG on 23															SpCas9-NRCH NRCH on 23								SpCas9-NRTH comp. NGGN on 23 SpCas9-NRCH comp. NGGN on 23	xCas9 comp. NG on 24 SpCas9-NG comp. NG on 24		St3Cas9 comp. NGGNG on 23
rs1057518073	ACTB	60	likely-pathogenic		GTGATGGACTCCGGTGACGGGGTCA<C>CCACACTGTGCCCATCTACGAGGGG	T	From C to T				VQR SpCas9 comp. NGAN on 23											SpCas9-NRRH comp. NRRH on 22			AsCas12a RR TYCV on 25								SpCas9-NRTH NRTH on 23
rs587780273	ACTB	60	likely-pathogenic	Baraitser-Winter syndrome 1 (BRWS1)	CTCCGGCATGTGCAAGGCCGGCTTC<G>CGGGCGACGATGCCCCCCGGGCCGT	A	From G to A													SpCas9 (From Strep. past.) comp. NNGTGA on 22
rs368352689	ACTB	60	pathogenic		GTGGATCAGCAAGCAGGAGTATGAC<G>AGTCCGGCCCCTCCATCGTCCACCG	C	From G to C	SpCas9 comp. NGG on 24					KKH SaCas9 comp. NNNRRT on 22				CjCas9 NNNVRYM on 19					SpCas9-NRRH comp. NRRH on 24	SpCas9-NRCH NRCH on 22								SpCas9-NRRH comp. NGGN on 24 SpCas9-NRTH comp. NGGN on 24 SpCas9-NRCH comp. NGGN on 24	xCas9 comp. NG on 24 SpCas9-NG comp. NG on 24
rs1057518071	ACTB	60	likely-pathogenic		CTACAGCTTCACCACCACGGCCGAG<C>GGGAAATCGTGCGTGACATTAAGGA	G	From C to G	SpCas9 NGG on 23 SpCas9 NGG on 24											SpCas9-NG NANG on 22												SpCas9-NRRH NGGN on 23 SpCas9-NRTH NGGN on 23 SpCas9-NRCH NGGN on 23 SpCas9-NRRH NGGN on 24 SpCas9-NRTH NGGN on 24 SpCas9-NRCH NGGN on 24	xCas9 NG on 24 SpCas9-NG NG on 24		St3Cas9 NGGNG on 23 St3Cas9 NGGNG on 24
rs587779775	ACTB	60	pathogenic	Baraitser-Winter syndrome 1 (BRWS1)	TCCCTGTACGCCTCTGGCCGTACCA<C>TGGCATCGTGATGGACTCCGGTGAC	T	From C to T																				enAsCas12a VTTV on 24	FnCas12a TTV on 25					SpCas9-NRTH NRTH on 23
rs281875333	ACTB	60	pathogenic.likely-pathogenic	Baraitser-Winter syndrome 1 (BRWS1)	CTACCTCATGAAGATCCTCACCGAG<C>GCGGCTACAGCTTCACCACCACGGC	T	From C to T					SaCas9 NNGRRT on 20	KKH SaCas9 NNNRRT on 20				CjCas9 comp. NNNVRYM on 19						SpCas9-NRCH comp. NRCH on 22
rs587779773	ACTB	60	pathogenic	Baraitser-Winter syndrome 1 (BRWS1)	AACCCCAAGGCCAACCGCGAGAAGA<T>GACCCAGGTGAGTGGCCCGCTACCT	C	From T to C																									xCas9 comp. NG on 24 SpCas9-NG comp. NG on 24
rs397515470	ACTB	60	pathogenic	Baraitser-Winter syndrome 1 (BRWS1)	CCCCCTGAACCCCAAGGCCAACCGC<G>AGAAGATGACCCAGGTGAGTGGCCC	A	From G to A										CjCas9 NNNVRYM on 19						SpCas9-NRCH NRCH on 22				enAsCas12a comp. VTTV on 23	FnCas12a comp. TTV on 24
rs587779769	ACTB	60	pathogenic	Baraitser-Winter syndrome 1 (BRWS1)	AGAGGCATCCTCACCCTGAAGTACC<C>CATCGAGCACGGCATCGTCACCAAC	T	From C to T			EQR SpCas9 comp. NGAG on 23	VQR SpCas9 comp. NGAN on 23
rs886041266	ACTB	60	likely-pathogenic		AGATCCTCACCGAGCGCGGCTACAG<C>TTCACCACCACGGCCGAGCGGGAAA	G	From C to G	SpCas9 NGG on 23					KKH SaCas9 NNNRRT on 21				CjCas9 comp. NNNVRYM on 20		SpCas9-NG NANG on 22			SpCas9-NRRH NRRH on 23 SpCas9-NRRH comp. NRRH on 22	SpCas9-NRCH comp. NRCH on 23								SpCas9-NRRH NGGN on 23 SpCas9-NRTH NGGN on 23	xCas9 NG on 24 SpCas9-NG NG on 24	SpCas9-NRTH NRTH on 24
rs797044950	ACTB	60	pathogenic		TCCCCCATGCCATCCTGCGTCTGGA<C>CTGGCTGGCCGGGACCTGACTGACT	T	From C to T				VQR SpCas9 comp. NGAN on 23	SaCas9 NNGRRT on 20	KKH SaCas9 NNNRRT on 20									SpCas9-NRRH comp. NRRH on 22											SpCas9-NRTH NRTH on 23
rs1064793444	ACTB	60	pathogenic		ACCACGGCCGAGCGGGAAATCGTGC<G>TGACATTAAGGAGAAGCTGTGCTAC	A	From G to A																SpCas9-NRCH NRCH on 22
rs281875332	ACTB	60	pathogenic.not-provided	Baraitser-Winter syndrome 1 (BRWS1)	CGAGGCCCAGAGCAAGAGAGGCATC<C>TCACCCTGAAGTACCCCATCGAGCA	G	From C to G										CjCas9 NNNVRYM on 21					SpCas9-NRRH comp. NRRH on 22										xCas9 NG on 24 SpCas9-NG NG on 24	SpCas9-NRTH NRTH on 24
rs730880408	ACTC1	70	uncertain-significance.likely-pathogenic	Familial hypertrophic cardiomyopathy 11 (CMH11). Dilated cardiomyopathy 1R (CMD1R). Atrial septal defect 5 (ASD5)	CTGAAGCTGTGCCAAGATGTGTGAC<G>ACGAGGAGACCACCGCCCTGGTGTG	A	From G to A										CjCas9 NNNVRYM on 19						SpCas9-NRCH NRCH on 22			enAsCas12a comp. TGTV on 25	enAsCas12a comp. VTTV on 23	FnCas12a comp. TTV on 24
rs727504379	ACTC1	70	likely-pathogenic	Cardiomyopathy (CMYO)	TACAATAGCATCATGAAGTGTGACA<T>TGATATCCGCAAGGACCTGTATGCC	C	From T to C																SpCas9-NRCH NRCH on 23									xCas9 comp. NG on 24 SpCas9-NG comp. NG on 24
rs730880402	ACTC1	70	uncertain-significance.likely-pathogenic		TGACATTGATATCCGCAAGGACCTG<T>ATGCCAACAATGTCTTATCTGGAGG	C	From T to C												SpCas9-NG comp. NANG on 22				SpCas9-NRCH NRCH on 23									xCas9 comp. NG on 24 SpCas9-NG comp. NG on 24
rs730880404	ACTC1	70	pathogenic		ATGCAGAAGGAAATCACTGCTCTGG<C>TCCTAGCACCATGAAGATTAAGGTA	T	From C to T						KKH SaCas9 NNNRRT on 20									SpCas9-NRRH comp. NRRH on 22			AsCas12a RR TYCV on 25		enAsCas12a VTTV on 24	FnCas12a TTV on 25		enAsCas12a TTCN on 25 Cas12e (CasX) TTCN on 25			SpCas9-NRTH NRTH on 23
rs730880401	ACTC1	70	likely-pathogenic		TGTGTGTGTGACTCGTTCCCAGGTA<T>GGAATCTGCTGGCATCCATGAAACA	C	From T to C																									xCas9 comp. NG on 24 SpCas9-NG comp. NG on 24
rs121912675	ACTC1	70	pathogenic	Familial hypertrophic cardiomyopathy 11 (CMH11)	CATTGATATCCGCAAGGACCTGTAT<G>CCAACAATGTCTTATCTGGAGGCAC	T	From G to T				VQR SpCas9 comp. NGAN on 23	SaCas9 comp. NNGRRT on 22	KKH SaCas9 comp. NNNRRT on 22		St1Cas9 comp. NNRGAAW on 21							SpCas9-NRRH comp. NRRH on 23 SpCas9-NRRH comp. NRRH on 24			AsCas12a RR TYCV on 24 AsCas12a RR TYCV on 25		enAsCas12a VTTV on 23	FnCas12a TTV on 24		enAsCas12a TTCN on 24 Cas12e (CasX) TTCN on 24			SpCas9-NRTH NRTH on 22
rs121912676	ACTC1	70	pathogenic.uncertain-significance	Familial hypertrophic cardiomyopathy 11 (CMH11). Familial hypertrophic cardiomyopathy 11 (CMH11). Dilated cardiomyopathy 1R (CMD1R). Atrial septal defect 5 (ASD5)	GGACGACATGGAGAAGATCTGGCAC<C>ACACCTTCTACAATGAGCTCCGTGT	T	From C to T																										SpCas9-NRTH comp. NRTH on 22
rs121912674	ACTC1	70	pathogenic	Dilated cardiomyopathy 1R (CMD1R)	CAGCAAATGTGGATTAGCAAGCAAG<A>GTACGATGAGGCAGGCCCATCCATT	G	From A to G	SpCas9 NGG on 23											SpCas9-NG NANG on 22												SpCas9-NRRH NGGN on 23 SpCas9-NRTH NGGN on 23 SpCas9-NRCH NGGN on 23 SpCas9-NRTH NGGN on 24 SpCas9-NRCH NGGN on 24	xCas9 NG on 24 SpCas9-NG NG on 24
rs863225303	ACTC1	70	pathogenic	Dilated cardiomyopathy 1R (CMD1R)	ATATCCGCAAGGACCTGTATGCCAA<C>AATGTCTTATCTGGAGGCACCACTA	G	From C to G				VQR SpCas9 NGAN on 24	SaCas9 NNGRRT on 23			St1Cas9 NNRGAAW on 22				SpCas9-NG NANG on 22			SpCas9-NRRH NRRH on 23 SpCas9-NRRH NRRH on 24								enAsCas12a comp. TTCN on 23 Cas12e (CasX) comp. TTCN on 23		xCas9 NG on 24 SpCas9-NG NG on 24
rs767734253	ACTC1	70	likely-pathogenic	Familial hypertrophic cardiomyopathy 11 (CMH11)	AAGATCTGGCACCACACCTTCTACA<A>TGAGCTCCGTGTGGCTCCCGAGGAG	G	From A to G													SpCas9 (From Strep. past.) NNGTGA on 23			SpCas9-NRCH comp. NRCH on 23									xCas9 NG on 24 SpCas9-NG NG on 24
rs769303249	ACTC1	70	likely-benign.likely-pathogenic	Familial hypertrophic cardiomyopathy 11 (CMH11). Dilated cardiomyopathy 1R (CMD1R). Atrial septal defect 5 (ASD5)	AGCTCCGTGTGGCTCCCGAGGAGCA<C>CCCACCCTGCTCACAGAGGCCCCGC	T	From C to T				VQR SpCas9 comp. NGAN on 23											SpCas9-NRRH comp. NRRH on 22			AsCas12a RR TYCV on 25								SpCas9-NRTH NRTH on 23
rs730880406	ACTC1	70	likely-pathogenic		TTTGTTTTCTTTCTGCAGATTATTG<C>TCCCCCTGAGCGTAAATACTCTGTC	T	From C to T															SpCas9-NRRH comp. NRRH on 22			AsCas12a RR TYCV on 25		enAsCas12a VTTV on 24	FnCas12a TTV on 25		enAsCas12a TTCN on 25 Cas12e (CasX) TTCN on 25			SpCas9-NRTH NRTH on 23
rs121912673	ACTC1	70	pathogenic.likely-pathogenic	Dilated cardiomyopathy 1R (CMD1R). Familial hypertrophic cardiomyopathy 11 (CMH11). Dilated cardiomyopathy 1R (CMD1R). Atrial septal defect 5 (ASD5)	ACTATGTACCCTGGTATTGCTGATC<G>TATGCAGAAGGAAATCACTGCTCTG	A	From G to A																	AsCas12a RVR comp. TATV on 23
rs397517059	ACTC1	70	likely-pathogenic.uncertain-significance		GCTCCGTGTGGCTCCCGAGGAGCAC<C>CCACCCTGCTCACAGAGGCCCCGCT	A	From C to A						KKH SaCas9 comp. NNNRRT on 20				CjCas9 NNNVRYM on 21					SpCas9-NRRH comp. NRRH on 22	SpCas9-NRCH NRCH on 24			enAsCas12a comp. TGTV on 25
rs193922680	ACTC1	70	pathogenic.pathogenic-likely-pathogenic	Familial hypertrophic cardiomyopathy 11 (CMH11). Left ventricular noncompaction 4 (LVNC4). Primary familial hypertrophic cardiomyopathy (HCM). Familial hypertrophic cardiomyopathy 11 (CMH11). Dilated cardiomyopathy 1R (CMD1R). Atrial septal defect 5 (ASD5)	CTACAATGAGCTCCGTGTGGCTCCC<G>AGGAGCACCCCACCCTGCTCACAGA	A	From G to A																				enAsCas12a comp. VTTV on 23	FnCas12a comp. TTV on 24
rs397517063	ACTC1	70	likely-pathogenic.uncertain-significance		GGCAGGCATTGTTCTGGACTCTGGG<G>ATGGTGTAACTCACAATGTCCCCAT	A	From G to A				VQR SpCas9 NGAN on 23				St1Cas9 NNRGAAW on 21							SpCas9-NRRH NRRH on 22			AsCas12a RR comp. TYCV on 25		enAsCas12a comp. VTTV on 23	FnCas12a comp. TTV on 24		enAsCas12a comp. TTCN on 24 Cas12e (CasX) comp. TTCN on 24
rs730880407	ACTC1	70	uncertain-significance.likely-pathogenic	Cardiovascular phenotype	GAGTACGATGAGGCAGGCCCATCCA<T>TGTCCACCGCAAATGCTTCTAAGAT	C	From T to C																SpCas9-NRCH NRCH on 23									xCas9 comp. NG on 24 SpCas9-NG comp. NG on 24
rs397517071	ACTC1	70	likely-pathogenic.uncertain-significance		GAGACACTCTTCCAGCCCTCCTTCA<T>TGGTGAGTTGTAGGGTCTGGTGCAG	C	From T to C													SpCas9 (From Strep. past.) comp. NNGTGA on 23			SpCas9-NRCH NRCH on 23									xCas9 comp. NG on 24 SpCas9-NG comp. NG on 24
rs267606629	ACTC1	70	pathogenic	Familial hypertrophic cardiomyopathy 11 (CMH11)	TTTTGTTTTCTTTCTGCAGATTATT<G>CTCCCCCTGAGCGTAAATACTCTGT	C	From G to C	SpCas9 comp. NGG on 23			VQR SpCas9 comp. NGAN on 24	SaCas9 comp. NNGRRT on 23			St1Cas9 comp. NNRGAAW on 22				SpCas9-NG comp. NANG on 22			SpCas9-NRRH comp. NRRH on 23 SpCas9-NRRH comp. NRRH on 24			AsCas12a RR TYCV on 23					enAsCas12a TTCN on 23 Cas12e (CasX) TTCN on 23	SpCas9-NRRH comp. NGGN on 23 SpCas9-NRTH comp. NGGN on 23	xCas9 comp. NG on 24 SpCas9-NG comp. NG on 24
rs121912677	ACTC1	70	pathogenic	Atrial septal defect 5 (ASD5)	CAACCGGGAGAAGATGACTCAGATC<A>TGTTTGAGACCTTCAATGTCCCTGC	G	From A to G																									xCas9 NG on 24 SpCas9-NG NG on 24
rs267606628	ACTC1	70	uncertain-significance.pathogenic	Familial hypertrophic cardiomyopathy 11 (CMH11)	TGGGGATGGTGTAACTCACAATGTC<C>CCATCTATGAGGGCTACGCTTTGCC	G	From C to G		VRER SpCas9 comp. NGCG on 23								CjCas9 NNNVRYM on 21					SpCas9-NRRH comp. NRRH on 22	SpCas9-NRCH NRCH on 24									xCas9 NG on 24 SpCas9-NG NG on 24
rs193922681	ACTC1	70	likely-pathogenic	Primary familial hypertrophic cardiomyopathy (HCM)	CGGCTCTGGGCTGGTGAAGGCCGGC<T>TTGCGGGCGATGACGCGCCCCGCGC	C	From T to C										CjCas9 NNNVRYM on 19		SpCas9-NG comp. NANG on 22								enAsCas12a VTTV on 25				SpCas9-NRTH comp. NGGN on 24 SpCas9-NRCH comp. NGGN on 24	xCas9 comp. NG on 24 SpCas9-NG comp. NG on 24
rs730880403	ACTC1	70	likely-pathogenic		TGGTATTGCTGATCGTATGCAGAAG<G>AAATCACTGCTCTGGCTCCTAGCAC	A	From G to A				VQR SpCas9 NGAN on 23				St1Cas9 NNRGAAW on 21			LbCas12a & AsCas12a comp. TTTV on 23				SpCas9-NRRH NRRH on 22						FnCas12a comp. TTV on 24	enAsCas12a comp. TTTT on 22	enAsCas12a comp. TTCN on 24 Cas12e (CasX) comp. TTCN on 24
rs727504323	ACTC1	70	uncertain-significance.likely-pathogenic	Primary familial hypertrophic cardiomyopathy (HCM). Cardiovascular phenotype. Familial hypertrophic cardiomyopathy 11 (CMH11). Dilated cardiomyopathy 1R (CMD1R). Atrial septal defect 5 (ASD5)	CTTCCGCTGTCCTGAGACACTCTTC<C>AGCCCTCCTTCATTGGTGAGTTGTA	G	From C to G			EQR SpCas9 NGAG on 24	VQR SpCas9 NGAN on 24																					xCas9 NG on 24 SpCas9-NG NG on 24
rs397517065	ACTC1	70	likely-pathogenic	Primary dilated cardiomyopathy (DCM). Inborn genetic diseases	CATCATGCGTCTGGATCTGGCTGGT<C>GGGACCTCACTGACTACCTCATGAA	T	From C to T																				enAsCas12a VTTV on 23	FnCas12a TTV on 24
rs730880409	ACTC1	70	uncertain-significance.likely-pathogenic	Familial hypertrophic cardiomyopathy 11 (CMH11). Dilated cardiomyopathy 1R (CMD1R). Atrial septal defect 5 (ASD5)	GATGGTGTAACTCACAATGTCCCCA<T>CTATGAGGGCTACGCTTTGCCCCAT	C	From T to C	SpCas9 comp. NGG on 23											SpCas9-NG comp. NANG on 22				SpCas9-NRCH NRCH on 23								SpCas9-NRTH comp. NGGN on 23 SpCas9-NRCH comp. NGGN on 23	xCas9 comp. NG on 24 SpCas9-NG comp. NG on 24		St3Cas9 comp. NGGNG on 23
rs730880410	ACTC1	70	likely-pathogenic		GCTCTGGCTCCTAGCACCATGAAGA<T>TAAGGTAAAGAACTTTTGTGAGTGG	C	From T to C																SpCas9-NRCH NRCH on 23									xCas9 comp. NG on 24 SpCas9-NG comp. NG on 24
rs267606630_0	ACTG1	71	pathogenic.not-provided		TGAACCCCAAGGCCAACAGAGAGAA<G>ATGACTCAGGTGAGGCTCGGCCGAC	A	From G to A								St1Cas9 NNRGAAW on 19			LbCas12a & AsCas12a comp. TTTV on 25				SpCas9-NRRH NRRH on 22							enAsCas12a comp. TTTT on 24
rs267606630_1	ACTG1	71	pathogenic.not-provided	Deafness. autosomal dominant 20 (DFNA20)	TGAACCCCAAGGCCAACAGAGAGAA<G>ATGACTCAGGTGAGGCTCGGCCGAC	C	From G to C										CjCas9 NNNVRYM on 20		SpCas9-NG comp. NANG on 22			SpCas9-NRRH NRRH on 22	SpCas9-NRCH NRCH on 23									xCas9 comp. NG on 24 SpCas9-NG comp. NG on 24	SpCas9-NRTH comp. NRTH on 24
rs28999111	ACTG1	71	pathogenic	Deafness. autosomal dominant 20 (DFNA20)	GACATGGAGAAGATCTGGCACCACA<C>CTTCTACAACGAGCTGCGCGTGGCC	T	From C to T				VQR SpCas9 comp. NGAN on 23											SpCas9-NRRH comp. NRRH on 22											SpCas9-NRTH NRTH on 23
rs281875329_0	ACTG1	71	pathogenic.not-provided		CATCACCATTGGCAATGAGCGGTTC<C>GGTGTCCGGAGGCGCTGTTCCAGCC	A	From C to A												SpCas9-NG NANG on 24
rs267606631	ACTG1	71	likely-pathogenic.pathogenic.not-provided	Deafness. autosomal dominant 20 (DFNA20). Nonsyndromic hearing loss and deafness	CTCCTCTTCTCTGGAGAAGAGCTAC<G>AGCTGCCCGATGGCCAGGTCATCAC	A	From G to A																SpCas9-NRCH NRCH on 22			enAsCas12a comp. TGTV on 25	enAsCas12a comp. VTTV on 23	FnCas12a comp. TTV on 24
rs11549196	ACTG1	71	likely-pathogenic		CATCCAGGCCGTGCTGTCCCTCTAC<G>CCTCTGGGCGCACCACTGGCATTGT	T	From G to T			EQR SpCas9 comp. NGAG on 23	VQR SpCas9 comp. NGAN on 23	SaCas9 comp. NNGRRT on 22	KKH SaCas9 comp. NNNRRT on 22									SpCas9-NRRH comp. NRRH on 24	SpCas9-NRCH NRCH on 22
rs1057518673	ACTG1	71	likely-pathogenic	Baraitser-Winter Syndrome 2 (BRWS2)	TCCTTCCATCGTCGGGCGCCCCAGA<C>ACCAGGTGAGTGGATGGCGCCGCGG	T	From C to T						KKH SaCas9 NNNRRT on 20				CjCas9 comp. NNNVRYM on 19							AsCas12a RVR comp. TATV on 24									SpCas9-NRTH NRTH on 23 SpCas9-NRTH comp. NRTH on 22
rs281875328_0	ACTG1	71	pathogenic.not-provided		CCAGGTCATCACCATTGGCAATGAG<C>GGTTCCGGTGTCCGGAGGCGCTGTT	A	From C to A			EQR SpCas9 NGAG on 23	VQR SpCas9 NGAN on 23								SpCas9-NG NANG on 24
rs281875328_1	ACTG1	71	pathogenic.not-provided	Baraitser-Winter Syndrome 2 (BRWS2)	CCAGGTCATCACCATTGGCAATGAG<C>GGTTCCGGTGTCCGGAGGCGCTGTT	T	From C to T					SaCas9 NNGRRT on 20	KKH SaCas9 NNNRRT on 20
rs281875326	ACTG1	71	pathogenic.not-provided	Baraitser-Winter Syndrome 2 (BRWS2)	CGCACCACTGGCATTGTCATGGACT<C>TGGAGACGGGGTCACCCACACGGTG	T	From C to T											LbCas12a & AsCas12a TTTV on 24										FnCas12a TTV on 25
rs28999112	ACTG1	71	pathogenic	Deafness. autosomal dominant 20 (DFNA20)	GAATCTTGCGGCATCCACGAGACCA<C>CTTCAACTCCATCATGAAGTGTGAC	T	From C to T				VQR SpCas9 comp. NGAN on 23											SpCas9-NRRH comp. NRRH on 22											SpCas9-NRTH NRTH on 23
rs11549225	ACTG1	71	likely-pathogenic		CGAGGCTACAGCTTCACCACCACGG<C>CGAGCGGGAAATCGTGCGCGACATC	T	From C to T				VQR SpCas9 comp. NGAN on 23		KKH SaCas9 NNNRRT on 20																				SpCas9-NRTH NRTH on 23
rs1057518086	ACTG1	71	likely-pathogenic		CGCGCTGGTCATTGACAATGGCTCC<G>GCATGTGCAAAGCTGGTTTTGCTGG	C	From G to C	SpCas9 comp. NGG on 24	VRER SpCas9 comp. NGCG on 22																						SpCas9-NRRH comp. NGGN on 24 SpCas9-NRTH comp. NGGN on 24 SpCas9-NRCH comp. NGGN on 24	xCas9 comp. NG on 24 SpCas9-NG comp. NG on 24
rs587780275	ACTG1	71	likely-pathogenic	Baraitser-Winter Syndrome 2 (BRWS2)	GATCCTCACTGAGCGAGGCTACAGC<T>TCACCACCACGGCCGAGCGGGAAAT	A	From T to A						KKH SaCas9 comp. NNNRRT on 20				CjCas9 NNNVRYM on 19 CjCas9 NNNVRYM on 21																SpCas9-NRTH NRTH on 24
rs281875327	ACTG1	71	pathogenic.not-provided	Baraitser-Winter Syndrome 2 (BRWS2)	GAGCGAGGCTACAGCTTCACCACCA<C>GGCCGAGCGGGAAATCGTGCGCGAC	A	From C to A												SpCas9-NG NANG on 24								enAsCas12a comp. VTTV on 24	FnCas12a comp. TTV on 25
rs11549190	ACTG1	71	pathogenic.not-provided	Baraitser-Winter Syndrome 2 (BRWS2)	TTCAACACCCCGGCCATGTACGTGG<C>CATCCAGGCCGTGCTGTCCCTCTAC	T	From C to T				VQR SpCas9 comp. NGAN on 23		KKH SaCas9 NNNRRT on 20																				SpCas9-NRTH NRTH on 23
rs886041280	ACTG1	71	likely-pathogenic		ACGGGTCGTCCCCTGCAGGGCGTCA<T>GGTGGGCATGGGCCAGAAGGACTCC	A	From T to A												SpCas9-NG NANG on 24								enAsCas12a comp. VTTV on 24	FnCas12a comp. TTV on 25
rs104894544	ACTG1	71	pathogenic	Deafness. autosomal dominant 20 (DFNA20)	CTGAACCCCAAGGCCAACAGAGAGA<A>GATGACTCAGGTGAGGCTCGGCCGA	T	From A to T						KKH SaCas9 NNNRRT on 20				CjCas9 comp. NNNVRYM on 21																SpCas9-NRTH comp. NRTH on 24
rs104894547	ACTG1	71	pathogenic	Deafness. autosomal dominant 20 (DFNA20)	TACGACGAGTCGGGCCCCTCCATCG<T>CCACCGCAAATGCTTCTAAACGGAC	C	From T to C	SpCas9 comp. NGG on 23	VRER SpCas9 comp. NGCG on 24														SpCas9-NRCH NRCH on 23								SpCas9-NRTH comp. NGGN on 23 SpCas9-NRCH comp. NGGN on 23	xCas9 comp. NG on 24 SpCas9-NG comp. NG on 24		St3Cas9 comp. NGGNG on 23
rs1057524703	ACTG1	71	likely-pathogenic		CGAGCGGGAAATCGTGCGCGACATC<A>AGGAGAAGCTGTGCTACGTCGCCCT	C	From A to C	SpCas9 comp. NGG on 24				SaCas9 comp. NNGRRT on 23										SpCas9-NRRH comp. NRRH on 24			AsCas12a RR TYCV on 23						SpCas9-NRRH comp. NGGN on 24 SpCas9-NRTH comp. NGGN on 24 SpCas9-NRCH comp. NGGN on 24	xCas9 comp. NG on 24 SpCas9-NG comp. NG on 24
rs281875325	ACTG1	71	pathogenic.not-provided	Baraitser-Winter Syndrome 2 (BRWS2)	CCCAAGGCCAACAGAGAGAAGATGA<C>TCAGGTGAGGCTCGGCCGACGCCCG	T	From C to T						KKH SaCas9 NNNRRT on 20	NmCas9 NNNNGATT on 19								SpCas9-NRRH comp. NRRH on 22			AsCas12a RR TYCV on 25		enAsCas12a VTTV on 24	FnCas12a TTV on 25		enAsCas12a TTCN on 25 Cas12e (CasX) TTCN on 25			SpCas9-NRTH NRTH on 23
rs104894545	ACTG1	71	pathogenic	Deafness. autosomal dominant 20 (DFNA20)	CTGGCTGTCTTTGCAGATCATCGCA<C>CCCCAGAGCGCAAGTACTCGGTGTG	G	From C to G										CjCas9 NNNVRYM on 21					SpCas9-NRRH NRRH on 23 SpCas9-NRRH comp. NRRH on 22	SpCas9-NRCH NRCH on 24 SpCas9-NRCH comp. NRCH on 23									xCas9 NG on 24 SpCas9-NG NG on 24
rs104894546	ACTG1	71	pathogenic	Deafness. autosomal dominant 20 (DFNA20)	CGGTGTCCGGAGGCGCTGTTCCAGC<C>TTCCTTCCTGGGTAGGTGTTGTGAG	T	From C to T								St1Cas9 comp. NNRGAAW on 19			LbCas12a & AsCas12a TTTV on 25				SpCas9-NRRH comp. NRRH on 22
rs886041756	ACTG1	71	likely-pathogenic		AACTCCATCATGAAGTGTGACGTGG<A>CATCCGCAAAGACCTGTACGCCAAC	G	From A to G	SpCas9 NGG on 23															SpCas9-NRCH comp. NRCH on 23								SpCas9-NRTH NGGN on 23 SpCas9-NRCH NGGN on 23	xCas9 NG on 24 SpCas9-NG NG on 24
rs869312168	ACTG2	72	pathogenic	Chronic intestinal pseudoobstruction	GCTGTCTTCCCCTCCATTGTGGGCC<G>CCCTCGCCACCAGGTGCGTGCTCAT	A	From G to A					SaCas9 comp. NNGRRT on 20	KKH SaCas9 comp. NNNRRT on 20
rs864309492	ACTG2	72	pathogenic	Visceral myopathy (VSCM)	CTCATGAAGATCCTCACAGAGAGAG<G>CTATTCCTTTGTGACCACAGGTATC	A	From G to A				VQR SpCas9 NGAN on 23		KKH SaCas9 comp. NNNRRT on 20									SpCas9-NRRH NRRH on 22											SpCas9-NRTH comp. NRTH on 23
rs587777388	ACTG2	72	pathogenic		TGAAACCTTCAATGTCCCTGCCATG<T>ACGTCGCCATTCAAGCTGTGCTCTC	C	From T to C																SpCas9-NRCH NRCH on 23									xCas9 comp. NG on 24 SpCas9-NG comp. NG on 24
rs730880256	ACTG2	72	likely-pathogenic		GTGCTCTCCCTCTATGCCTCTGGCC<G>CACGACAGGTGAGTAATCCTGTAAT	A	From G to A																			enAsCas12a comp. TGTV on 23
rs1057522054	ACTG2	72	likely-pathogenic		GAGGCTCCCCTAAATCCCAAGGCCA<A>CAGGGAAAAGATGACCCAGGTAAGA	G	From A to G																SpCas9-NRCH comp. NRCH on 23									xCas9 NG on 24 SpCas9-NG NG on 24
rs587777383	ACTG2	72	pathogenic		TGTGCTCTCCCTCTATGCCTCTGGC<C>GCACGACAGGTGAGTAATCCTGTAA	T	From C to T																SpCas9-NRCH comp. NRCH on 22
rs587777384	ACTG2	72	pathogenic	Visceral myopathy (VSCM). Inborn genetic diseases	TATGCCCTGCCCCATGCCATCATGC<G>CCTGGACTTGGCTGGCCGTGACCTC	T	From G to T			EQR SpCas9 comp. NGAG on 23	VQR SpCas9 comp. NGAN on 23											SpCas9-NRRH comp. NRRH on 24	SpCas9-NRCH NRCH on 22
rs587777386	ACTG2	72	pathogenic	Visceral myopathy (VSCM). Visceral neuropathy. familial. autosomal dominant (ACTG2)	TTCCCCTCCATTGTGGGCCGCCCTC<G>CCACCAGGTGCGTGCTCATCTGGAT	A	From G to A						KKH SaCas9 comp. NNNRRT on 20							SpCas9 (From Strep. past.) comp. NNGTGA on 22
rs864309490	ACTG2	72	pathogenic	Visceral myopathy (VSCM)	CTTCTTTTTGCATTGCAGGGTGTGA<T>GGTGGGAATGGGCCAGAAAGACAGC	C	From T to C																									xCas9 comp. NG on 24 SpCas9-NG comp. NG on 24
rs797044959	ACTG2	72	pathogenic	Inborn genetic diseases. Megacystis. Chronic intestinal pseudoobstruction	ATCACCATTGGCAATGAGCGCTTCC<G>CTGCCCTGAGACCCTCTTCCAGCCT	A	From G to A						KKH SaCas9 comp. NNNRRT on 20
rs587777385	ACTG2	72	likely-pathogenic.pathogenic	Visceral myopathy (VSCM)	CTTCCCCTCCATTGTGGGCCGCCCT<C>GCCACCAGGTGCGTGCTCATCTGGA	T	From C to T										CjCas9 comp. NNNVRYM on 19						SpCas9-NRCH comp. NRCH on 22				enAsCas12a VTTV on 23	FnCas12a TTV on 24
rs587777387	ACTG2	72	pathogenic	Visceral myopathy (VSCM). Inborn genetic diseases. Megacystis. Chronic intestinal pseudoobstruction. Visceral neuropathy. familial. autosomal dominant (ACTG2)	TATCACCATTGGCAATGAGCGCTTC<C>GCTGCCCTGAGACCCTCTTCCAGCC	T	From C to T										CjCas9 comp. NNNVRYM on 19						SpCas9-NRCH comp. NRCH on 22
rs140943831_0	ACTG2	72	likely-pathogenic		ACTACCTCATGAAGATCCTCACAGA<G>AGAGGCTATTCCTTTGTGACCACAG	A	From G to A								St1Cas9 NNRGAAW on 20			LbCas12a & AsCas12a comp. TTTV on 24				SpCas9-NRRH NRRH on 22						FnCas12a comp. TTV on 25		enAsCas12a comp. TTCN on 25 Cas12e (CasX) comp. TTCN on 25
rs140943831_1	ACTG2	72	likely-pathogenic		ACTACCTCATGAAGATCCTCACAGA<G>AGAGGCTATTCCTTTGTGACCACAG	T	From G to T						KKH SaCas9 NNNRRT on 20				CjCas9 NNNVRYM on 20					SpCas9-NRRH NRRH on 22		AsCas12a RVR comp. TATV on 24									SpCas9-NRTH NRTH on 23 SpCas9-NRTH comp. NRTH on 24
rs1057520694	ACTG2	72	pathogenic		ACGGACTACCTCATGAAGATCCTCA<C>AGAGAGAGGCTATTCCTTTGTGACC	T	From C to T																	AsCas12a RVR comp. TATV on 24									SpCas9-NRTH NRTH on 23
rs864309491	ACTG2	72	pathogenic		TGTGGGGGATGAGGCTCAGAGCAAG<C>GAGGGATCCTAACTCTCAAATACCC	T	From C to T						KKH SaCas9 NNNRRT on 20							SpCas9 (From Strep. past.) NNGTGA on 22
rs78001248	ACTG2	72	pathogenic	Visceral myopathy (VSCM)	CTATGCCCTGCCCCATGCCATCATG<C>GCCTGGACTTGGCTGGCCGTGACCT	T	From C to T										CjCas9 comp. NNNVRYM on 19						SpCas9-NRCH comp. NRCH on 22			enAsCas12a TGTV on 23
rs1057516046	ACTG2	72	pathogenic	Visceral myopathy (VSCM)	GAGAGGCTATTCCTTTGTGACCACA<G>GTATCCAGCCCCTTTTCTGATTCTG	A	From G to A																				enAsCas12a comp. VTTV on 24	FnCas12a comp. TTV on 25
rs868064163	ACTL6A	86	likely-pathogenic	Torticollis. Atrial septal defect (ASD). Inguinal hernia. Syncope. Coarse facial features. Broad thumb. Delayed speech and language development. Recurrent otitis media. Broad nasal tip. Umbilical hernia. Gastroesophageal reflux. Aplasia/Hypoplasia of the nails. Cleft anterior mitral valve leaflet	GCATATTCTTCTATTTCAGAGTATG<C>GGTTGAAATTGATTGCAAATAATAC	T	From C to T																			enAsCas12a TGTV on 23
rs1060499738	ACTL6B	51412	likely-pathogenic	Global developmental delay (DD). Intellectual disability	TACAATACAGACTACGGCGCCGAGC<G>ACTCCGCATCCCTGAGGGCCTGTTT	A	From G to A										CjCas9 NNNVRYM on 19						SpCas9-NRCH NRCH on 22				enAsCas12a comp. VTTV on 23	FnCas12a comp. TTV on 24
rs387907345	ACTN1	87	pathogenic	Platelet-type bleeding disorder 15 (BDPLT15)	CCTGGATTTCATAGCCAGCAAAGGC<G>TCAAACTGGTGTCCATCGGAGCCGA	A	From G to A						KKH SaCas9 comp. NNNRRT on 20				CjCas9 NNNVRYM on 19						SpCas9-NRCH NRCH on 22
rs387907346	ACTN1	87	pathogenic	Platelet-type bleeding disorder 15 (BDPLT15)	GCTCCTGGACCCGGCCTGGGAGAAG<C>AGCAGAGAAAGGTTAGCAGCCGCCC	A	From C to A				VQR SpCas9 NGAN on 23								SpCas9-NG NANG on 24			SpCas9-NRRH NRRH on 23					enAsCas12a comp. VTTV on 23	FnCas12a comp. TTV on 24		enAsCas12a comp. TTCN on 24 Cas12e (CasX) comp. TTCN on 24
rs387907350	ACTN1	87	pathogenic	Platelet-type bleeding disorder 15 (BDPLT15)	GGACATCCCCAAGATGCTGGATGCC<G>AAGGTGAAAGGCGCTTTCCTTCTGT	A	From G to A											LbCas12a & AsCas12a comp. TTTV on 23										FnCas12a comp. TTV on 24
rs786204950	ACTN2	88	pathogenic	Familial hypertrophic cardiomyopathy 23 (CMH23)	ACCCAGGAGCAGATGAATGAGTTCA<G>AGCCTCCTTCAACCACTTTGACAGG	C	From G to C										CjCas9 NNNVRYM on 20			SpCas9 (From Strep. past.) comp. NNGTGA on 23			SpCas9-NRCH NRCH on 23			enAsCas12a comp. TGTV on 24						xCas9 comp. NG on 24 SpCas9-NG comp. NG on 24
rs770335717	ACTN2	88	likely-pathogenic.uncertain-significance	Dilated cardiomyopathy 1AA (CMD1AA). Primary familial hypertrophic cardiomyopathy (HCM)	AGAGACGGCTGACACCGACACTGCC<G>AGCAGGTCATCGCCTCCTTCCGGAT	A	From G to A																				enAsCas12a comp. VTTV on 23	FnCas12a comp. TTV on 24
rs200248944	ACTN2	88	uncertain-significance.pathogenic	Familial hypertrophic cardiomyopathy 23 (CMH23). Hypertrophic cardiomyopathy. Dilated cardiomyopathy 1AA (CMD1AA). Primary familial hypertrophic cardiomyopathy (HCM)	TGTGACCAGTGGGACCGACTGGGAA<C>GCTTACTCAGAAGAGGAGAGAAGCC	T	From C to T					SaCas9 NNGRRT on 20	KKH SaCas9 NNNRRT on 20		St1Cas9 NNRGAAW on 19		CjCas9 comp. NNNVRYM on 19						SpCas9-NRCH comp. NRCH on 22
rs786204949	ACTN2	88	pathogenic	Familial hypertrophic cardiomyopathy 23 (CMH23)	GCTTTGGATTACATAGCCAGCAAAG<G>GGTGAAACTGGTGTCCATTGGCGCT	T	From G to T						KKH SaCas9 NNNRRT on 20									SpCas9-NRRH NRRH on 22	SpCas9-NRCH comp. NRCH on 24
rs772909106	ACTN2	88	likely-pathogenic		CAGCATGCTAACGAGCGTCTGAGGC<G>CCAGTTTGCTGCCCAAGCCAATGCC	A	From G to A						KKH SaCas9 comp. NNNRRT on 20				CjCas9 NNNVRYM on 19						SpCas9-NRCH NRCH on 22
rs1131691370	ACTN2	88	likely-pathogenic		CAAAGGGGTGAAACTGGTGTCCATT<G>GCGCTGAAGGTGAGAGGTGTGGTGG	T	From G to T											LbCas12a & AsCas12a TTTV on 23				SpCas9-NRRH comp. NRRH on 24						FnCas12a TTV on 24
rs121434525	ACTN2	88	uncertain-significance.pathogenic.conflicting-interpretations-of-pathogenicity.likely-benign	Dilated cardiomyopathy 1AA (CMD1AA). Primary dilated cardiomyopathy (DCM). Cardiovascular phenotype. Dilated cardiomyopathy 1AA (CMD1AA). Primary familial hypertrophic cardiomyopathy (HCM)	ATGAACCAGATAGAGCCCGGCGTGC<A>GTACAACTACGTGTACGACGAGGAT	G	From A to G		VRER SpCas9 NGCG on 22								CjCas9 comp. NNNVRYM on 22														SpCas9-NRTH NGGN on 24 SpCas9-NRCH NGGN on 24	xCas9 NG on 24 SpCas9-NG NG on 24
rs727502886	ACTN2	88	pathogenic	Cardiomyopathy (CMYO). Dilated cardiomyopathy 1AA (CMD1AA). Familial hypertrophic cardiomyopathy 23 (CMH23)	AGGGGTGAAACTGGTGTCCATTGGC<G>CTGAAGGTGAGAGGTGTGGTGGGTG	A	From G to A						KKH SaCas9 comp. NNNRRT on 20				CjCas9 NNNVRYM on 19						SpCas9-NRCH NRCH on 22
rs763078071	ACTN2	88	uncertain-significance.pathogenic		TCGGGAGCTGCCCCCGGATCAGGCC<C>AGTACTGCATCAAGAGGATGCCCGC	G	From C to G			EQR SpCas9 NGAG on 24	VQR SpCas9 NGAN on 24	SaCas9 NNGRRT on 23																				xCas9 NG on 24 SpCas9-NG NG on 24
rs786204951	ACTN2	88	pathogenic	Familial hypertrophic cardiomyopathy 23 (CMH23)	ATCCGCGATCAATCCCTGCAGGAGG<A>GCTGGCTCGCCAGCATGCTAACGAG	G	From A to G	SpCas9 NGG on 23									CjCas9 comp. NNNVRYM on 19														SpCas9-NRRH NGGN on 23 SpCas9-NRTH NGGN on 23 SpCas9-NRCH NGGN on 23 SpCas9-NRTH NGGN on 24 SpCas9-NRCH NGGN on 24	xCas9 NG on 24 SpCas9-NG NG on 24
rs786205144	ACTN2	88	pathogenic.likely-pathogenic	Dilated cardiomyopathy 1AA (CMD1AA). Cardiovascular phenotype	GAGAAGCACCTGGATATTCCTAAAA<T>GTTGGATGCTGAAGGTGAGATGAAA	C	From T to C									TdCas9 NAAAAC on 20			SpCas9-NG comp. NANG on 22													xCas9 comp. NG on 24 SpCas9-NG comp. NG on 24
rs786205453	ACTN2	88	uncertain-significance.likely-pathogenic		CTGGACCATCATCCTTCGCTTTGCT<A>TTCAGGATATTTCGGTTGAAGGTAA	G	From A to G																SpCas9-NRCH comp. NRCH on 23									xCas9 NG on 24 SpCas9-NG NG on 24
rs121908417	ACTN4	81	pathogenic	Focal segmental glomerulosclerosis 1 (FSGS1)	CGAGAAGGCCATAATGACCTATGTG<T>CCAGCTTCTACCATGCCTTTTCAGG	C	From T to C	SpCas9 comp. NGG on 23															SpCas9-NRCH NRCH on 23								SpCas9-NRTH comp. NGGN on 23 SpCas9-NRCH comp. NGGN on 23	xCas9 comp. NG on 24 SpCas9-NG comp. NG on 24
rs121908416	ACTN4	81	pathogenic	Focal segmental glomerulosclerosis 1 (FSGS1)	CGGCCCGACGAGAAGGCCATAATGA<C>CTATGTGTCCAGCTTCTACCATGCC	T	From C to T				VQR SpCas9 comp. NGAN on 23		KKH SaCas9 NNNRRT on 20									SpCas9-NRRH comp. NRRH on 22											SpCas9-NRTH NRTH on 23
rs121908415	ACTN4	81	pathogenic	Focal segmental glomerulosclerosis 1 (FSGS1)	CGTGAACACGGCCCGGCCCGACGAG<A>AGGCCATAATGACCTATGTGTCCAG	G	From A to G	SpCas9 NGG on 23		EQR SpCas9 NGAG on 24	VQR SpCas9 NGAN on 24								SpCas9-NG NANG on 22												SpCas9-NRTH NGGN on 23 SpCas9-NRCH NGGN on 23	xCas9 NG on 24 SpCas9-NG NG on 24		St3Cas9 NGGNG on 23
rs878853159	ACTN4	81	pathogenic	Focal segmental glomerulosclerosis 1 (FSGS1)	CTTTCCTTCCCCAGCTGGAAGGATG<G>TCTTGCCTTCAATGCCCTGATCCAC	A	From G to A				VQR SpCas9 NGAN on 23		KKH SaCas9 comp. NNNRRT on 20																				SpCas9-NRTH comp. NRTH on 23
rs1057519875	ACVR1	90	likely-pathogenic	Adenocarcinoma of stomach. Brainstem glioma	GAATTGTACAACACTGTGATGCTGA<G>GCATGAAAATATCTTAGGTAAGTAC	T	From G to T						KKH SaCas9 NNNRRT on 20				CjCas9 comp. NNNVRYM on 21					SpCas9-NRRH NRRH on 22											SpCas9-NRTH comp. NRTH on 24
rs387906588	ACVR1	90	pathogenic	Progressive myositis ossificans (FOP)	GCACATAGAGATATTTGGGACCCAA<G>GGAAACCAGCCATTGCCCATCGAGA	T	From G to T						KKH SaCas9 NNNRRT on 20									SpCas9-NRRH NRRH on 22											SpCas9-NRTH comp. NRTH on 24
rs387906591	ACVR1	90	pathogenic	Progressive myositis ossificans (FOP)	TCTGGTCTTCCTTTTCTGGTACAAA<G>AACAGTGGCTCGCCAGATTACACTG	T	From G to T						KKH SaCas9 NNNRRT on 20				CjCas9 NNNVRYM on 20					SpCas9-NRRH NRRH on 22											SpCas9-NRTH NRTH on 23 SpCas9-NRTH comp. NRTH on 24
rs121912678	ACVR1	90	pathogenic		TTTCTGGTACAAAGAACAGTGGCTC<G>CCAGATTACACTGTTGGAGTGTGTC	C	From G to C	SpCas9 comp. NGG on 23 SpCas9 comp. NGG on 24														SpCas9-NRRH comp. NRRH on 24			AsCas12a RR TYCV on 23						SpCas9-NRRH comp. NGGN on 23 SpCas9-NRTH comp. NGGN on 23 SpCas9-NRCH comp. NGGN on 23 SpCas9-NRRH comp. NGGN on 24 SpCas9-NRTH comp. NGGN on 24 SpCas9-NRCH comp. NGGN on 24	xCas9 comp. NG on 24 SpCas9-NG comp. NG on 24		St3Cas9 comp. NGGNG on 24
rs121912679	ACVR1	90	pathogenic	Progressive myositis ossificans (FOP)	TACATTGTTATCTTCTTCCTTTCAG<G>CCTGGCAGTCATGCATTCCCAGAGC	A	From G to A				VQR SpCas9 NGAN on 23		KKH SaCas9 comp. NNNRRT on 20									SpCas9-NRRH NRRH on 22											SpCas9-NRTH comp. NRTH on 23
rs797045135	ACVR1	90	pathogenic	Progressive myositis ossificans (FOP)	TGTACATCAGGAAGTGGCTCTGGTC<T>TCCTTTTCTGGTACAAAGAACAGTG	C	From T to C			EQR SpCas9 comp. NGAG on 22																					SpCas9-NRTH comp. NGGN on 24 SpCas9-NRCH comp. NGGN on 24	xCas9 comp. NG on 24 SpCas9-NG comp. NG on 24		St3Cas9 comp. NGGNG on 21
rs863224846	ACVR1	90	likely-pathogenic		GGAATTGTACAACACTGTGATGCTG<A>GGCATGAAAATATCTTAGGTAAGTA	C	From A to C		VRER SpCas9 NGCG on 23								CjCas9 comp. NNNVRYM on 21						SpCas9-NRCH comp. NRCH on 24									xCas9 comp. NG on 24 SpCas9-NG comp. NG on 24
rs387906589	ACVR1	90	pathogenic.likely-pathogenic	Brainstem glioma	CACATAGAGATATTTGGGACCCAAG<G>GAAACCAGCCATTGCCCATCGAGAT	T	From G to T						KKH SaCas9 NNNRRT on 20							SpCas9 (From Strep. past.) NNGTGA on 22		SpCas9-NRRH NRRH on 22	SpCas9-NRCH comp. NRCH on 24
rs121912680_0	ACVR1	90	pathogenic		AATTGTACAACACTGTGATGCTGAG<G>CATGAAAATATCTTAGGTAAGTACA	A	From G to A				VQR SpCas9 NGAN on 23											SpCas9-NRRH NRRH on 22				enAsCas12a comp. TGTV on 23							SpCas9-NRTH comp. NRTH on 23
rs121912680_1	ACVR1	90	pathogenic	Progressive myositis ossificans (FOP)	AATTGTACAACACTGTGATGCTGAG<G>CATGAAAATATCTTAGGTAAGTACA	C	From G to C	SpCas9 comp. NGG on 23									CjCas9 NNNVRYM on 20					SpCas9-NRRH NRRH on 22 SpCas9-NRRH comp. NRRH on 23	SpCas9-NRCH NRCH on 23 SpCas9-NRCH comp. NRCH on 24								SpCas9-NRRH comp. NGGN on 23 SpCas9-NRTH comp. NGGN on 23	xCas9 comp. NG on 24 SpCas9-NG comp. NG on 24
rs387906590	ACVR1	90	pathogenic	Progressive myositis ossificans (FOP)	CAGCTTGATGTGGGGAACAATCCCC<G>TGTGGGCACCAAGCGCTACATGGCC	C	From G to C	SpCas9 comp. NGG on 24																							SpCas9-NRRH comp. NGGN on 24 SpCas9-NRTH comp. NGGN on 24 SpCas9-NRCH comp. NGGN on 24	xCas9 comp. NG on 24 SpCas9-NG comp. NG on 24		St3Cas9 comp. NGGNG on 24
rs121434438	ACVR2B	93	pathogenic	Heterotaxy. visceral. 4. autosomal (HTX4)	CAACGGCACTACCTCGGACTGTCTC<G>TTTCCCTGGTGACCTCTGTCACCAA	A	From G to A						KKH SaCas9 comp. NNNRRT on 20
rs1085307429	ACVRL1	94	pathogenic	Pulmonary arterial hypertension related to hereditary hemorrhagic telangiectasia	CGCGCTGCGGATCAAGAAGACACTA<C>AAAAAATTAGCAACAGTCCAGAGAA	T	From C to T																	AsCas12a RVR TATV on 23 AsCas12a RVR comp. TATV on 24									SpCas9-NRTH NRTH on 23
rs1301762186	ACVRL1	94	pathogenic		GCCTAGCTCAGATGATGCGGGAGTG<C>TGGTACCCAAACCCCTCTGCCCGAC	T	From C to T																				enAsCas12a VTTV on 24	FnCas12a TTV on 25					SpCas9-NRTH NRTH on 23
rs1085307417	ACVRL1	94	pathogenic	Primary pulmonary hypertension (PPH1)	AAGCGGTACATGGCACCCGAGGTGC<T>GGACGAGCAGATCCGCACGGACTGC	C	From T to C																								SpCas9-NRTH comp. NGGN on 24 SpCas9-NRCH comp. NGGN on 24	xCas9 comp. NG on 24 SpCas9-NG comp. NG on 24
rs1085307408	ACVRL1	94	pathogenic	Pulmonary arterial hypertension related to hereditary hemorrhagic telangiectasia	CTGCACACAGGCTTCATCGCCTCAG<A>CATGACCTCCCGCAACTCGAGCACG	G	From A to G	SpCas9 NGG on 23											SpCas9-NG NANG on 22				SpCas9-NRCH comp. NRCH on 23								SpCas9-NRTH NGGN on 23 SpCas9-NRCH NGGN on 23	xCas9 NG on 24 SpCas9-NG NG on 24
rs779485996_0	ACVRL1	94	pathogenic		GCTGTGGCTCATCACGCACTACCAC<G>AGCACGGCTCCCTCTACGACTTTCT	C	From G to C	SpCas9 comp. NGG on 24					KKH SaCas9 comp. NNNRRT on 22				CjCas9 NNNVRYM on 19					SpCas9-NRRH comp. NRRH on 24	SpCas9-NRCH NRCH on 22								SpCas9-NRRH comp. NGGN on 24 SpCas9-NRTH comp. NGGN on 24 SpCas9-NRCH comp. NGGN on 24	xCas9 comp. NG on 24 SpCas9-NG comp. NG on 24		St3Cas9 comp. NGGNG on 24
rs779485996_1	ACVRL1	94	pathogenic	Hereditary hemorrhagic telangiectasia type 2 (HHT2)	GCTGTGGCTCATCACGCACTACCAC<G>AGCACGGCTCCCTCTACGACTTTCT	T	From G to T						KKH SaCas9 comp. NNNRRT on 22									SpCas9-NRRH comp. NRRH on 24	SpCas9-NRCH NRCH on 22
rs1318118188	ACVRL1	94	pathogenic		AGGCACCCCCAGGAACATCGGGGCT<G>CGGGAACTTGCACAGGGAGCTCTGC	A	From G to A																										SpCas9-NRTH comp. NRTH on 23
rs1131691286	ACVRL1	94	likely-pathogenic		CTATAGACCACCCTTCTATGATGTG<G>TGCCCAATGACCCCAGCTTTGAGGA	T	From G to T										CjCas9 comp. NNNVRYM on 21					SpCas9-NRRH comp. NRRH on 23	SpCas9-NRCH comp. NRCH on 24				enAsCas12a VTTV on 24	FnCas12a TTV on 25					SpCas9-NRTH NRTH on 23
rs1085307414	ACVRL1	94	pathogenic.likely-pathogenic		GGCGCACCTGCACGTGGAGATCTTC<G>GTACACAGGGCAAACCAGCCATTGC	T	From G to T															SpCas9-NRRH comp. NRRH on 24				enAsCas12a TGTV on 25
rs148057374	ACVRL1	94	pathogenic		GTACATGGCACCCGAGGTGCTGGAC<G>AGCAGATCCGCACGGACTGCTTTGA	C	From G to C	SpCas9 comp. NGG on 24					KKH SaCas9 comp. NNNRRT on 22				CjCas9 NNNVRYM on 19					SpCas9-NRRH comp. NRRH on 24	SpCas9-NRCH NRCH on 22								SpCas9-NRRH comp. NGGN on 24 SpCas9-NRTH comp. NGGN on 24 SpCas9-NRCH comp. NGGN on 24	xCas9 comp. NG on 24 SpCas9-NG comp. NG on 24
rs863223413	ACVRL1	94	pathogenic	Hereditary hemorrhagic telangiectasia type 2 (HHT2)	GCCATTGCCCACCGCGACTTCAAGA<G>CCGCAATGTGCTGGTCAAGAGCAAC	T	From G to T				VQR SpCas9 comp. NGAN on 23	SaCas9 comp. NNGRRT on 21	KKH SaCas9 NNNRRT on 20 KKH SaCas9 comp. NNNRRT on 21				CjCas9 NNNVRYM on 20 CjCas9 comp. NNNVRYM on 21					SpCas9-NRRH NRRH on 22 SpCas9-NRRH comp. NRRH on 23			AsCas12a RR TYCV on 25								SpCas9-NRTH NRTH on 23 SpCas9-NRTH comp. NRTH on 24
rs1085307415	ACVRL1	94	pathogenic.likely-pathogenic	Pulmonary arterial hypertension related to hereditary hemorrhagic telangiectasia. Hereditary hemorrhagic telangiectasia type 2 (HHT2)	ACAGGCCTCACCCCCACAGGCCTGG<C>TGTGATGCACTCACAGGGCAGCGAT	A	From C to A				VQR SpCas9 NGAN on 23	SaCas9 NNGRRT on 21	KKH SaCas9 NNNRRT on 21				CjCas9 comp. NNNVRYM on 20		SpCas9-NG NANG on 24			SpCas9-NRRH NRRH on 23			AsCas12a RR comp. TYCV on 25								SpCas9-NRTH comp. NRTH on 23
rs1085307410	ACVRL1	94	pathogenic	Primary pulmonary hypertension (PPH1)	CACGCACTACCACGAGCACGGCTCC<C>TCTACGACTTTCTGCAGAGACAGAC	T	From C to T															SpCas9-NRRH comp. NRRH on 22					enAsCas12a VTTV on 24	FnCas12a TTV on 25		enAsCas12a TTCN on 25 Cas12e (CasX) TTCN on 25
rs1085307405	ACVRL1	94	pathogenic	Pulmonary arterial hypertension related to hereditary hemorrhagic telangiectasia	GGAGGGGAGGCACCCCCAGGAACAT<C>GGGGCTGCGGGAACTTGCACAGGGA	T	From C to T																				enAsCas12a VTTV on 23	FnCas12a TTV on 24
rs121909289	ACVRL1	94	pathogenic	Pulmonary arterial hypertension related to hereditary hemorrhagic telangiectasia	GAGTCCTACAAGTGGACTGACATCT<G>GGCCTTTGGCCTGGTGCTGTGGGAG	T	From G to T												SpCas9-NG comp. NANG on 24								enAsCas12a VTTV on 23	FnCas12a TTV on 24
rs1085307412	ACVRL1	94	pathogenic	Primary pulmonary hypertension (PPH1)	TGTCCGCGGCATGCGGCCTGGCGCA<C>CTGCACGTGGAGATCTTCGGTACAC	G	From C to G															SpCas9-NRRH NRRH on 23 SpCas9-NRRH comp. NRRH on 22	SpCas9-NRCH NRCH on 24 SpCas9-NRCH comp. NRCH on 23									xCas9 NG on 24 SpCas9-NG NG on 24
rs863223408	ACVRL1	94	pathogenic	Pulmonary arterial hypertension. Epistaxis. Pulmonary arterial hypertension related to hereditary hemorrhagic telangiectasia. Hereditary hemorrhagic telangiectasia type 2 (HHT2)	CCCTCTGCCCGACTCACCGCGCTGC<G>GATCAAGAAGACACTACAAAAAATT	A	From G to A																SpCas9-NRCH NRCH on 22
rs1085307425	ACVRL1	94	pathogenic	Primary pulmonary hypertension (PPH1)	GAGTGCTGGTACCCAAACCCCTCTG<C>CCGACTCACCGCGCTGCGGATCAAG	A	From C to A				VQR SpCas9 NGAN on 23		KKH SaCas9 comp. NNNRRT on 20				CjCas9 NNNVRYM on 21 CjCas9 comp. NNNVRYM on 20					SpCas9-NRRH NRRH on 23 SpCas9-NRRH comp. NRRH on 22	SpCas9-NRCH NRCH on 24										SpCas9-NRTH comp. NRTH on 23
rs28936687	ACVRL1	94	pathogenic	Pulmonary arterial hypertension related to hereditary hemorrhagic telangiectasia	CTTCCCCTCTGGCCATCAGGAAAAG<G>CCGCTATGGCGAAGTGTGGCGGGGC	A	From G to A				VQR SpCas9 NGAN on 23		KKH SaCas9 comp. NNNRRT on 20									SpCas9-NRRH NRRH on 22											SpCas9-NRTH comp. NRTH on 23
rs1085307419	ACVRL1	94	pathogenic.likely-pathogenic	Primary pulmonary hypertension (PPH1)	AGGCATCGTGGAGGACTATAGACCA<C>CCTTCTATGATGTGGTGCCCAATGA	A	From C to A						KKH SaCas9 comp. NNNRRT on 20				CjCas9 NNNVRYM on 21					SpCas9-NRRH NRRH on 23 SpCas9-NRRH comp. NRRH on 22	SpCas9-NRCH NRCH on 24				enAsCas12a comp. VTTV on 24	FnCas12a comp. TTV on 25					SpCas9-NRTH comp. NRTH on 23
rs1318446539	ACVRL1	94	pathogenic	Hereditary hemorrhagic telangiectasia type 2 (HHT2)	CCTGGTGCAGAGGACAGTGGCACGG<C>AGGTTGCCTTGGTGGAGTGTGTGGG	T	From C to T						KKH SaCas9 NNNRRT on 20																				SpCas9-NRTH NRTH on 23
rs1060503235	ACVRL1	94	pathogenic	Hereditary hemorrhagic telangiectasia type 2 (HHT2)	ATCTGGGCCTTTGGCCTGGTGCTGT<G>GGAGATTGCCCGCCGGACCATCGTG	A	From G to A																										SpCas9-NRTH NRTH on 22
rs121909286	ACVRL1	94	pathogenic	Hereditary hemorrhagic telangiectasia type 2 (HHT2)	TTTGAGTCCTACAAGTGGACTGACA<T>CTGGGCCTTTGGCCTGGTGCTGTGG	A	From T to A						KKH SaCas9 comp. NNNRRT on 20									SpCas9-NRRH NRRH on 23	SpCas9-NRCH NRCH on 24				enAsCas12a comp. VTTV on 24	FnCas12a comp. TTV on 25					SpCas9-NRTH comp. NRTH on 23
rs1085307418	ACVRL1	94	pathogenic	Pulmonary arterial hypertension related to hereditary hemorrhagic telangiectasia	TGAGTCCTACAAGTGGACTGACATC<T>GGGCCTTTGGCCTGGTGCTGTGGGA	C	From T to C					SaCas9 comp. NNGRRT on 23													AsCas12a RR TYCV on 23						SpCas9-NRTH comp. NGGN on 24 SpCas9-NRCH comp. NGGN on 24	xCas9 comp. NG on 24 SpCas9-NG comp. NG on 24
rs1131691346	ACVRL1	94	likely-pathogenic		GCCTACCTGCCGGGGGGCCTGGTGC<A>CAGTAGTGCTGGTGCGGGAGGAGGG	G	From A to G		VRER SpCas9 NGCG on 22 VRER SpCas9 comp. NGCG on 23								CjCas9 comp. NNNVRYM on 22															xCas9 NG on 24 SpCas9-NG NG on 24
rs1064794217	ACVRL1	94	pathogenic.likely-pathogenic	Hereditary hemorrhagic telangiectasia type 2 (HHT2)	CATGAAGAAGGTGGTGTGTGTGGAT<C>AGCAGACCCCCACCATCCCTAACCG	T	From C to T							NmCas9 NNNNGATT on 18													enAsCas12a VTTV on 23	FnCas12a TTV on 24
rs1060503248	ACVRL1	94	pathogenic.uncertain-significance	Hereditary hemorrhagic telangiectasia type 2 (HHT2). Pulmonary arterial hypertension related to hereditary hemorrhagic telangiectasia	AACAACCCGAGAGTGGGCACCAAGC<G>GTACATGGCACCCGAGGTGCTGGAC	A	From G to A										CjCas9 NNNVRYM on 19						SpCas9-NRCH NRCH on 22
rs1085307407	ACVRL1	94	pathogenic	Pulmonary arterial hypertension related to hereditary hemorrhagic telangiectasia	CTGGTGCAGAGGACAGTGGCACGGC<A>GGTTGCCTTGGTGGAGTGTGTGGGT	G	From A to G		VRER SpCas9 NGCG on 22			SaCas9 NNGRRT on 23					CjCas9 comp. NNNVRYM on 22														SpCas9-NRRH NGGN on 24 SpCas9-NRTH NGGN on 24 SpCas9-NRCH NGGN on 24	xCas9 NG on 24 SpCas9-NG NG on 24		St3Cas9 NGGNG on 21
rs1085307411	ACVRL1	94	pathogenic	Primary pulmonary hypertension (PPH1)	ACGCACTACCACGAGCACGGCTCCC<T>CTACGACTTTCTGCAGAGACAGACG	C	From T to C	SpCas9 comp. NGG on 23											SpCas9-NG comp. NANG on 22												SpCas9-NRRH comp. NGGN on 23 SpCas9-NRTH comp. NGGN on 23 SpCas9-NRCH comp. NGGN on 23 SpCas9-NRRH comp. NGGN on 24 SpCas9-NRTH comp. NGGN on 24 SpCas9-NRCH comp. NGGN on 24	xCas9 comp. NG on 24 SpCas9-NG comp. NG on 24		St3Cas9 comp. NGGNG on 23 St3Cas9 comp. NGGNG on 24
rs1085307420	ACVRL1	94	pathogenic	Pulmonary arterial hypertension related to hereditary hemorrhagic telangiectasia	GAGGACTATAGACCACCCTTCTATG<A>TGTGGTGCCCAATGACCCCAGCTTT	T	From A to T										CjCas9 comp. NNNVRYM on 21					SpCas9-NRRH comp. NRRH on 23	SpCas9-NRCH comp. NRCH on 24				enAsCas12a VTTV on 24	FnCas12a TTV on 25					SpCas9-NRTH NRTH on 23
rs121909285	ACVRL1	94	pathogenic	Hereditary hemorrhagic telangiectasia type 2 (HHT2)	AGGGGCCTACCTGCCGGGGGGCCTG<G>TGCACAGTAGTGCTGGTGCGGGAGG	T	From G to T										CjCas9 comp. NNNVRYM on 21					SpCas9-NRRH comp. NRRH on 23	SpCas9-NRCH comp. NRCH on 24				enAsCas12a VTTV on 24	FnCas12a TTV on 25					SpCas9-NRTH NRTH on 23
rs757645341	ACVRL1	94	uncertain-significance.pathogenic	Hereditary hemorrhagic telangiectasia type 2 (HHT2)	CCCGCAACTCGAGCACGCAGCTGTG<G>CTCATCACGCACTACCACGAGCACG	A	From G to A				VQR SpCas9 NGAN on 23	SaCas9 comp. NNGRRT on 20	KKH SaCas9 comp. NNNRRT on 20							SpCas9 (From Strep. past.) NNGTGA on 20													SpCas9-NRTH comp. NRTH on 23
rs762773076	ACVRL1	94	pathogenic		AGTGTGGCCGTCAAGATCTTCTCCT<C>GAGGGATGAACAGTCCTGGTTCCGG	T	From C to T																				enAsCas12a VTTV on 23	FnCas12a TTV on 24
rs121909288	ACVRL1	94	pathogenic	Hereditary hemorrhagic telangiectasia type 2 (HHT2). Pulmonary arterial hypertension related to hereditary hemorrhagic telangiectasia	CCCCTCTGCCCGACTCACCGCGCTG<C>GGATCAAGAAGACACTACAAAAAAT	T	From C to T																			enAsCas12a TGTV on 23
rs141764916	ACVRL1	94	likely-pathogenic	Haemorrhagic telangiectasia 2	CCCGAGGTGCTGGACGAGCAGATCC<G>CACGGACTGCTTTGAGTCCTACAAG	A	From G to A																			enAsCas12a comp. TGTV on 23
rs28936399	ACVRL1	94	pathogenic	Hereditary hemorrhagic telangiectasia type 2 (HHT2)	CCGAGAGTGGGCACCAAGCGGTACA<T>GGCACCCGAGGTGCTGGACGAGCAG	G	From T to G	SpCas9 NGG on 24																							SpCas9-NRRH NGGN on 24 SpCas9-NRTH NGGN on 24 SpCas9-NRCH NGGN on 24	xCas9 NG on 24 SpCas9-NG NG on 24
rs28936688	ACVRL1	94	pathogenic	Hereditary hemorrhagic telangiectasia type 2 (HHT2). Pulmonary arterial hypertension related to hereditary hemorrhagic telangiectasia	GTGCTGGTCAAGAGCAACCTGCAGT<G>TTGCATCGCCGACCTGGGTGAGCCG	A	From G to A						KKH SaCas9 comp. NNNRRT on 20				CjCas9 NNNVRYM on 19																SpCas9-NRTH NRTH on 22 SpCas9-NRTH comp. NRTH on 23
rs1085307409	ACVRL1	94	pathogenic	Pulmonary arterial hypertension related to hereditary hemorrhagic telangiectasia	ACCTCCCGCAACTCGAGCACGCAGC<T>GTGGCTCATCACGCACTACCACGAG	C	From T to C										CjCas9 NNNVRYM on 19		SpCas9-NG comp. NANG on 22												SpCas9-NRTH comp. NGGN on 24 SpCas9-NRCH comp. NGGN on 24	xCas9 comp. NG on 24 SpCas9-NG comp. NG on 24
rs863223410	ACVRL1	94	pathogenic		ACCGAGTTCGTCAACCACTACTGCT<G>CGACAGCCACCTCTGCAACCACAAC	A	From G to A																										SpCas9-NRTH comp. NRTH on 23
rs753792569	ACVRL1	94	likely-benign.pathogenic	Primary pulmonary hypertension (PPH1). Hereditary hemorrhagic telangiectasia type 2 (HHT2)	TCTCCGTACCCCCAGGACCTCCTGG<A>CAGTGACTGCACCACAGGGAGTGGC	C	From A to C	SpCas9 comp. NGG on 23									CjCas9 NNNVRYM on 20 CjCas9 comp. NNNVRYM on 21					SpCas9-NRRH comp. NRRH on 23	SpCas9-NRCH NRCH on 23 SpCas9-NRCH comp. NRCH on 24								SpCas9-NRRH comp. NGGN on 23 SpCas9-NRCH comp. NGGN on 23	xCas9 comp. NG on 24 SpCas9-NG comp. NG on 24
rs138048445	ACVRL1	94	likely-pathogenic		CTTGTGGCACGGTGAGAGTGTGGCC<G>TCAAGATCTTCTCCTCGAGGGATGA	A	From G to A						KKH SaCas9 comp. NNNRRT on 20
rs1131691686	ACVRL1	94	pathogenic.likely-pathogenic	Hereditary hemorrhagic telangiectasia type 2 (HHT2)	GGGCACCAAGCGGTACATGGCACCC<G>AGGTGCTGGACGAGCAGATCCGCAC	A	From G to A																				enAsCas12a comp. VTTV on 23	FnCas12a comp. TTV on 24
rs1085307416	ACVRL1	94	pathogenic	Pulmonary arterial hypertension related to hereditary hemorrhagic telangiectasia	AACCCGAGAGTGGGCACCAAGCGGT<A>CATGGCACCCGAGGTGCTGGACGAG	G	From A to G										CjCas9 comp. NNNVRYM on 22						SpCas9-NRCH comp. NRCH on 23									xCas9 NG on 24 SpCas9-NG NG on 24		St3Cas9 NGGNG on 21
rs1085307406	ACVRL1	94	pathogenic	Primary pulmonary hypertension (PPH1)	TGCGACAGCCACCTCTGCAACCACA<A>CGTGTCCCTGGTGCTGGAGGGTACG	G	From A to G		VRER SpCas9 NGCG on 24														SpCas9-NRCH comp. NRCH on 23									xCas9 NG on 24 SpCas9-NG NG on 24
rs863223411	ACVRL1	94	likely-pathogenic		GCTCTGAGGCTAGCTGTGTCCGCGG<C>ATGCGGCCTGGCGCACCTGCACGTG	T	From C to T						KKH SaCas9 NNNRRT on 20				CjCas9 comp. NNNVRYM on 19							AsCas12a RVR TATV on 25									SpCas9-NRTH NRTH on 23 SpCas9-NRTH comp. NRTH on 22
rs863223409	ACVRL1	94	pathogenic		GGGCCTACCTGCCGGGGGGCCTGGT<G>CACAGTAGTGCTGGTGCGGGAGGAG	A	From G to A										CjCas9 NNNVRYM on 19									enAsCas12a comp. TGTV on 23							SpCas9-NRTH NRTH on 22 SpCas9-NRTH comp. NRTH on 23
rs1085307421	ACVRL1	94	pathogenic	Pulmonary arterial hypertension related to hereditary hemorrhagic telangiectasia	CAGCTTTGAGGACATGAAGAAGGTG<G>TGTGTGTGGATCAGCAGACCCCCAC	A	From G to A				VQR SpCas9 NGAN on 23									SpCas9 (From Strep. past.) NNGTGA on 20													SpCas9-NRTH comp. NRTH on 23
rs1064796530	ACVRL1	94	pathogenic		CAATGTGCTGGTCAAGAGCAACCTG<C>AGTGTTGCATCGCCGACCTGGGTGA	T	From C to T																			enAsCas12a TGTV on 23							SpCas9-NRTH NRTH on 23
rs28936401_0	ACVRL1	94	pathogenic		CAACAACCCGAGAGTGGGCACCAAG<C>GGTACATGGCACCCGAGGTGCTGGA	A	From C to A			EQR SpCas9 NGAG on 23	VQR SpCas9 NGAN on 23								SpCas9-NG NANG on 24
rs28936401_1	ACVRL1	94	pathogenic	Hereditary hemorrhagic telangiectasia type 2 (HHT2). Pulmonary arterial hypertension related to hereditary hemorrhagic telangiectasia	CAACAACCCGAGAGTGGGCACCAAG<C>GGTACATGGCACCCGAGGTGCTGGA	T	From C to T						KKH SaCas9 NNNRRT on 20
rs1085307428	ACVRL1	94	pathogenic	Pulmonary arterial hypertension related to hereditary hemorrhagic telangiectasia	CGACTCACCGCGCTGCGGATCAAGA<A>GACACTACAAAAAATTAGCAACAGT	C	From A to C										CjCas9 comp. NNNVRYM on 21															xCas9 comp. NG on 24 SpCas9-NG comp. NG on 24	SpCas9-NRTH comp. NRTH on 24
rs1085307426	ACVRL1	94	pathogenic	Primary pulmonary hypertension (PPH1). Hereditary hemorrhagic telangiectasia type 2 (HHT2)	TGCTGGTACCCAAACCCCTCTGCCC<G>ACTCACCGCGCTGCGGATCAAGAAG	A	From G to A																				enAsCas12a comp. VTTV on 23	FnCas12a comp. TTV on 24
rs1085307422	ACVRL1	94	pathogenic	Pulmonary arterial hypertension related to hereditary hemorrhagic telangiectasia	CTCTCTCCCAACCCCCAGGTCCTCT<C>AGGCCTAGCTCAGATGATGCGGGAG	G	From C to G			EQR SpCas9 NGAG on 24	VQR SpCas9 NGAN on 24																					xCas9 NG on 24 SpCas9-NG NG on 24
rs962224649	ACVRL1	94	pathogenic		TCTGGCCATCAGGAAAAGGCCGCTA<T>GGCGAAGTGTGGCGGGGCTTGTGGC	C	From T to C																									xCas9 comp. NG on 24 SpCas9-NG comp. NG on 24
rs886043123	ACVRL1	94	uncertain-significance.pathogenic		CTCCCCTTCCTGGTGCAGAGGACAG<T>GGCACGGCAGGTTGCCTTGGTGGAG	C	From T to C		VRER SpCas9 NGCG on 23																							xCas9 comp. NG on 24 SpCas9-NG comp. NG on 24
rs1085307413	ACVRL1	94	pathogenic	Primary pulmonary hypertension (PPH1)	GGCCTGGCGCACCTGCACGTGGAGA<T>CTTCGGTACACAGGGCAAACCAGCC	C	From T to C	SpCas9 comp. NGG on 23											SpCas9-NG comp. NANG on 22				SpCas9-NRCH NRCH on 23								SpCas9-NRTH comp. NGGN on 23 SpCas9-NRCH comp. NGGN on 23	xCas9 comp. NG on 24 SpCas9-NG comp. NG on 24
rs121912700	ACY1	95	pathogenic	Aminoacylase 1 deficiency (ACY1D)	TTCCCCCTACACCTCCCCAGGGGTG<C>GGGTTACCAGCACTGGGAGGCCAGG	T	From C to T																			enAsCas12a TGTV on 23
rs121912699	ACY1	95	pathogenic	Aminoacylase 1 deficiency (ACY1D)	CCATCCTGGCATTCCGGGAGAAGGA<A>TGGCAGAGGTGAGGCAGCCTGGGAG	C	From A to C						KKH SaCas9 comp. NNNRRT on 21				CjCas9 comp. NNNVRYM on 21					SpCas9-NRRH comp. NRRH on 23	SpCas9-NRCH NRCH on 23									xCas9 comp. NG on 24 SpCas9-NG comp. NG on 24	SpCas9-NRTH comp. NRTH on 24
rs121912698	ACY1	95	uncertain-significance.likely-pathogenic	Aminoacylase 1 deficiency (ACY1D)	TGCTGCCACTGACAACCGCTATATC<C>GCGCGGTGAGCCACTTGCATATAGT	T	From C to T										CjCas9 comp. NNNVRYM on 19						SpCas9-NRCH comp. NRCH on 22
rs121912701	ACY1	95	uncertain-significance.pathogenic.benign	Aminoacylase 1 deficiency (ACY1D)	CTCCGTGGGGTGGACATATATACAC<G>CCTGCTGCCTGCCCTTGCCAGTGTG	A	From G to A						KKH SaCas9 comp. NNNRRT on 20				CjCas9 NNNVRYM on 19						SpCas9-NRCH NRCH on 22			enAsCas12a comp. TGTV on 25
rs121908724	ADA	100	uncertain-significance.likely-pathogenic	Severe combined immunodeficiency due to ADA deficiency	GGTGGAACTGCATGTCCACCTAGAC<G>GATCCATCAAGCCTGAAACCATCTT	A	From G to A										CjCas9 NNNVRYM on 19						SpCas9-NRCH NRCH on 22			enAsCas12a comp. TGTV on 25
rs121908721	ADA	100	likely-pathogenic	Severe combined immunodeficiency due to ADA deficiency	CTCAAAAATGACCAGGCTAACTACT<C>GCTCAACACAGATGACCCGCTCATC	T	From C to T										CjCas9 comp. NNNVRYM on 19						SpCas9-NRCH comp. NRCH on 22				enAsCas12a VTTV on 23	FnCas12a TTV on 24
rs199422328	ADA	100	pathogenic	Severe combined immunodeficiency due to ADA deficiency	CAACCCCTTTCTTCCCTTCCCAGGG<G>CTGCCGGGAGGCTATCAAAAGGATC	T	From G to T				VQR SpCas9 comp. NGAN on 23	SaCas9 NNGRRT on 20	KKH SaCas9 NNNRRT on 20				CjCas9 NNNVRYM on 20 CjCas9 comp. NNNVRYM on 21					SpCas9-NRRH NRRH on 22 SpCas9-NRRH comp. NRRH on 23	SpCas9-NRCH comp. NRCH on 24										SpCas9-NRTH NRTH on 23
rs199422327	ADA	100	pathogenic	Severe combined immunodeficiency due to ADA deficiency	GACCCGCTCATCTTCAAGTCCACCC<T>GGACACTGATTACCAGATGACCAAA	G	From T to G	SpCas9 NGG on 24																							SpCas9-NRRH NGGN on 24 SpCas9-NRTH NGGN on 24 SpCas9-NRCH NGGN on 24	xCas9 NG on 24 SpCas9-NG NG on 24
rs267606634	ADA	100	pathogenic		ATGAAGGCCAAAGAGGGCGTGGTGT<A>TGTGGAGGTGCGGTACAGTCCGCAC	T	From A to T										CjCas9 comp. NNNVRYM on 22	LbCas12a & AsCas12a TTTV on 24				SpCas9-NRRH comp. NRRH on 23 SpCas9-NRRH comp. NRRH on 24						FnCas12a TTV on 25
rs121908740	ADA	100	uncertain-significance.pathogenic	Partial adenosine deaminase deficiency. Severe combined immunodeficiency due to ADA deficiency	GGAGGCTGTGAAGAGCGGCATTCAC<C>GTACTGTCCACGCCGGGGAGGTGGG	T	From C to T																SpCas9-NRCH comp. NRCH on 22			enAsCas12a TGTV on 25
rs79281338	ADA	100	likely-pathogenic		GCTGTGGACATACTCAAGACAGAGC<G>GCTGGGACACGGCTACCACACCCTG	T	From G to T															SpCas9-NRRH comp. NRRH on 24	SpCas9-NRCH NRCH on 22
rs121908735	ADA	100	likely-pathogenic	Severe combined immunodeficiency due to ADA deficiency	GGCCCGGTCCATCCTGTGCTGCATG<C>GCCACCAGCCCAGTGAGTAGGATCA	T	From C to T										CjCas9 comp. NNNVRYM on 19						SpCas9-NRCH comp. NRCH on 22			enAsCas12a TGTV on 23
rs121908729	ADA	100	not-provided.pathogenic	Partial adenosine deaminase deficiency. Severe combined immunodeficiency due to ADA deficiency	CTACAGGCTGTGGACATACTCAAGA<C>AGAGCGGCTGGGACACGGCTACCAC	T	From C to T						KKH SaCas9 NNNRRT on 20											AsCas12a RVR comp. TATV on 24									SpCas9-NRTH NRTH on 23
rs121908728	ADA	100	uncertain-significance.pathogenic		CTTCGGGGTCAAGGCCCGGTCCATC<C>TGTGCTGCATGCGCCACCAGCCCAG	G	From C to G																									xCas9 NG on 24 SpCas9-NG NG on 24
rs121908718	ADA	100	not-provided.pathogenic		AACTACTCGCTCAACACAGATGACC<C>GCTCATCTTCAAGTCCACCCTGGAC	T	From C to T										CjCas9 comp. NNNVRYM on 19						SpCas9-NRCH comp. NRCH on 22
rs114025668	ADA	100	uncertain-significance.pathogenic	Partial adenosine deaminase deficiency. Severe combined immunodeficiency due to ADA deficiency	GAGCGGCATTCACCGTACTGTCCAC<G>CCGGGGAGGTGGGCTCGGCCGAAGT	A	From G to A						KKH SaCas9 comp. NNNRRT on 20				CjCas9 NNNVRYM on 19						SpCas9-NRCH NRCH on 22			enAsCas12a comp. TGTV on 25
rs267606635	ADA	100	pathogenic	Severe combined immunodeficiency. autosomal recessive. T cell-negative. B cell-negative. NK cell-negative. due to adenosine deaminase deficiency	TGTGGAGGTGCGGTACAGTCCGCAC<C>TGCTGGCCAACTCCAAAGTGGAGCC	G	From C to G												SpCas9-NG NANG on 22													xCas9 NG on 24 SpCas9-NG NG on 24
rs121908714	ADA	100	not-provided.pathogenic	Severe combined immunodeficiency due to ADA deficiency	GAGGGCGTGGTGTATGTGGAGGTGC<G>GTACAGTCCGCACCTGCTGGCCAAC	T	From G to T															SpCas9-NRRH comp. NRRH on 24	SpCas9-NRCH NRCH on 22			enAsCas12a TGTV on 25
rs73598374_0	ADA	100	benign.pathogenic.likely-benign	Adenosine deaminase 2 allozyme. Severe combined immunodeficiency due to ADA deficiency	CACCATGGCCCAGACGCCCGCCTTC<G>ACAAGCCCAAAGTGAGCGCGCGCGG	A	From G to A																				enAsCas12a comp. VTTV on 23	FnCas12a comp. TTV on 24
rs73598374_1	ADA	100	benign.pathogenic.likely-benign		CACCATGGCCCAGACGCCCGCCTTC<G>ACAAGCCCAAAGTGAGCGCGCGCGG	T	From G to T															SpCas9-NRRH comp. NRRH on 24
rs121908739	ADA	100	pathogenic-likely-pathogenic.pathogenic	Severe combined immunodeficiency due to ADA deficiency	GAGGTGCGGTACAGTCCGCACCTGC<T>GGCCAACTCCAAAGTGGAGCCAATC	C	From T to C																								SpCas9-NRTH comp. NGGN on 24 SpCas9-NRCH comp. NGGN on 24	xCas9 comp. NG on 24 SpCas9-NG comp. NG on 24
rs780014431	ADA	100	pathogenic	Severe combined immunodeficiency due to ADA deficiency	GGGCCAGGGCCTGCAGGAGGGGGAG<C>GAGACTTCGGGGTCAAGGCCCGGTC	T	From C to T					SaCas9 NNGRRT on 20	KKH SaCas9 NNNRRT on 20							SpCas9 (From Strep. past.) NNGTGA on 22
rs121908722	ADA	100	uncertain-significance.pathogenic.likely-pathogenic	SCID due to ADA deficiency. delayed onset. Severe combined immunodeficiency due to ADA deficiency	GCCCGGTCCATCCTGTGCTGCATGC<G>CCACCAGCCCAGTGAGTAGGATCAC	A	From G to A						KKH SaCas9 comp. NNNRRT on 20										SpCas9-NRCH NRCH on 22
rs121908725	ADA	100	pathogenic.likely-pathogenic	Severe combined immunodeficiency due to ADA deficiency	CCCTGCCCCCTTGCAGGTGGAACTG<C>ATGTCCACCTAGACGGATCCATCAA	G	From C to G	SpCas9 NGG on 23			VQR SpCas9 NGAN on 24	SaCas9 NNGRRT on 22	KKH SaCas9 NNNRRT on 22				CjCas9 comp. NNNVRYM on 19					SpCas9-NRRH NRRH on 23 SpCas9-NRRH NRRH on 24			AsCas12a RR comp. TYCV on 24						SpCas9-NRRH NGGN on 23 SpCas9-NRTH NGGN on 23	xCas9 NG on 24 SpCas9-NG NG on 24	SpCas9-NRTH comp. NRTH on 22
rs121908715	ADA	100	pathogenic.likely-pathogenic	Severe combined immunodeficiency due to ADA deficiency. Severe combined immunodeficiency due to ADA deficiency	TTCTGGCCTTTCCAGAACATCAATG<C>GGCCAAATCTAGTTTCCTCCCAGAA	T	From C to T																			enAsCas12a TGTV on 23
rs74317375	ADA2	51816	pathogenic.benign	Behcet's syndrome (BD). Polyarteritis nodosa. childhoood-onset (PAN)	TCTGATGATCCCCGCCAAGGATGGC<G>TTAAGCTGCCTTACTTCTTCCACGC	A	From G to A						KKH SaCas9 comp. NNNRRT on 20				CjCas9 NNNVRYM on 19						SpCas9-NRCH NRCH on 22
rs775440641	ADA2	51816	pathogenic	Idiopathic livedo reticularis with systemic involvement	GCCTTACTTCTTCCACGCCGGAGAA<A>CAGGTGAGCCTGCGGGATGCGAGCA	G	From A to G												SpCas9-NG NANG on 22				SpCas9-NRCH comp. NRCH on 23				enAsCas12a comp. VTTV on 25					xCas9 NG on 24 SpCas9-NG NG on 24
rs750868279	ADA2	51816	pathogenic	Behcet's syndrome (BD)	AACGTGCTCTACATGGAGATCAGAG<C>CAGGCTGCTGCCGGTGAGCCCAGCT	T	From C to T				VQR SpCas9 comp. NGAN on 23	SaCas9 NNGRRT on 20	KKH SaCas9 NNNRRT on 20																				SpCas9-NRTH NRTH on 23
rs587777241	ADA2	51816	pathogenic	Polyarteritis nodosa. childhoood-onset (PAN)	TTCCCTCTCCAGGGGCTGCCTTGCA<C>CTCCATGACATTGGCATCGTGACTA	G	From C to G															SpCas9-NRRH NRRH on 23 SpCas9-NRRH comp. NRRH on 22	SpCas9-NRCH NRCH on 24 SpCas9-NRCH comp. NRCH on 23									xCas9 NG on 24 SpCas9-NG NG on 24
rs587777242	ADA2	51816	pathogenic	Polyarteritis nodosa. childhoood-onset (PAN)	AGTGGAGAGCACCATGACGAAGAGT<G>GTCAGTGAAGACTTACCAGGAAGTA	C	From G to C				VQR SpCas9 comp. NGAN on 24						CjCas9 NNNVRYM on 19		SpCas9-NG comp. NANG on 22			SpCas9-NRRH comp. NRRH on 24										xCas9 comp. NG on 24 SpCas9-NG comp. NG on 24	SpCas9-NRTH NRTH on 22
rs1226708979_0	ADA2	51816	likely-pathogenic	Polyarteritis nodosa. childhoood-onset (PAN)	TGAAACTGGTGTCTGACTTGAGGAA<C>CACCCTGTAGCCACTCTGATGGCCA	G	From C to G										CjCas9 NNNVRYM on 21		SpCas9-NG NANG on 22			SpCas9-NRRH NRRH on 23	SpCas9-NRCH NRCH on 24 SpCas9-NRCH comp. NRCH on 23									xCas9 NG on 24 SpCas9-NG NG on 24
rs1226708979_1	ADA2	51816	likely-pathogenic		TGAAACTGGTGTCTGACTTGAGGAA<C>CACCCTGTAGCCACTCTGATGGCCA	T	From C to T				VQR SpCas9 comp. NGAN on 23	SaCas9 NNGRRT on 20	KKH SaCas9 NNNRRT on 20	NmCas9 comp. NNNNGATT on 20	St1Cas9 NNRGAAW on 19					SpCas9 (From Strep. past.) comp. NNGTGA on 20													SpCas9-NRTH NRTH on 23
rs146597836	ADA2	51816	pathogenic.likely-benign	Behcet's syndrome (BD). Polyarteritis nodosa. childhoood-onset (PAN)	TCGCAGAATCCATCCGAATGGCCAT<G>GGGCTCCGAATCAAGTTCCCCACGG	A	From G to A										CjCas9 NNNVRYM on 19							AsCas12a RVR comp. TATV on 25									SpCas9-NRTH NRTH on 22
rs199614299	ADA2	51816	pathogenic.uncertain-significance	Behcet's syndrome (BD). Polyarteritis nodosa. childhoood-onset (PAN)	AGAAAAGATGATGCGGCTGGGGGGG<C>GGCTGGTGCTGAACACCAAGGAGGA	T	From C to T					SaCas9 NNGRRT on 20	KKH SaCas9 NNNRRT on 20
rs200930463	ADA2	51816	pathogenic	Polyarteritis nodosa. childhoood-onset (PAN)	TTGAAAGAAAAGATGATGCGGCTGG<G>GGGGCGGCTGGTGCTGAACACCAAG	T	From G to T						KKH SaCas9 NNNRRT on 20				CjCas9 comp. NNNVRYM on 21					SpCas9-NRRH NRRH on 22	SpCas9-NRCH comp. NRCH on 24
rs202134424	ADA2	51816	likely-pathogenic.uncertain-significance	Polyarteritis nodosa. childhoood-onset (PAN)	GTTGAAAGAAAAGATGATGCGGCTG<G>GGGGGCGGCTGGTGCTGAACACCAA	T	From G to T										CjCas9 comp. NNNVRYM on 21						SpCas9-NRCH comp. NRCH on 24			enAsCas12a TGTV on 23
rs376785840	ADA2	51816	pathogenic	Polyarteritis nodosa. childhoood-onset (PAN)	ATGTTTGGTGCCAAAGGCTTGTCCT<A>TGATTTCTATGAGGTCTTCATGGGC	G	From A to G													SpCas9 (From Strep. past.) NNGTGA on 23			SpCas9-NRCH comp. NRCH on 23			enAsCas12a TGTV on 24						xCas9 NG on 24 SpCas9-NG NG on 24
rs77563738	ADA2	51816	pathogenic		AAGTGGATTCTGCTGGAGGATTATC<G>GAAGCGGGTGCAGAACGTCACTGAG	C	From G to C	SpCas9 comp. NGG on 24				SaCas9 comp. NNGRRT on 23										SpCas9-NRRH comp. NRRH on 24			AsCas12a RR TYCV on 23						SpCas9-NRRH comp. NGGN on 24 SpCas9-NRTH comp. NGGN on 24 SpCas9-NRCH comp. NGGN on 24	xCas9 comp. NG on 24 SpCas9-NG comp. NG on 24
rs587777240	ADA2	51816	pathogenic		ACCATTCTTCTTCCCTCTCCAGGGG<C>TGCCTTGCACCTCCATGACATTGGC	A	From C to A				VQR SpCas9 NGAN on 23	SaCas9 NNGRRT on 21	KKH SaCas9 NNNRRT on 21				CjCas9 comp. NNNVRYM on 20		SpCas9-NG NANG on 24			SpCas9-NRRH NRRH on 23			AsCas12a RR comp. TYCV on 25								SpCas9-NRTH comp. NRTH on 23
rs483352913	ADAM10	102	pathogenic	Reticulate acropigmentation of Kitamura (RAK)	AAACTGAAACCTGGGAAACAGTGCA<G>GTACCTTGCTAATTTCAGTGATGTT	A	From G to A																				enAsCas12a comp. VTTV on 24	FnCas12a comp. TTV on 25
rs483352916	ADAM10	102	pathogenic	Reticulate acropigmentation of Kitamura (RAK)	GCATTCAAGTCAAAGTCTGAGAAGT<G>TCGGGATGATTCAGACTGTGCAAGG	A	From G to A						KKH SaCas9 comp. NNNRRT on 20				CjCas9 NNNVRYM on 19							AsCas12a RVR TATV on 24									SpCas9-NRTH NRTH on 22 SpCas9-NRTH comp. NRTH on 23
rs483352912	ADAM10	102	pathogenic	Reticulate acropigmentation of Kitamura (RAK)	TCGTGGTGGCACATTTTATGTTGAG<C>CAGCAGAGAGATATATTAAAGACCG	T	From C to T				VQR SpCas9 comp. NGAN on 23	SaCas9 NNGRRT on 20	KKH SaCas9 NNNRRT on 20																				SpCas9-NRTH NRTH on 23
rs483352914	ADAM10	102	pathogenic	Reticulate acropigmentation of Kitamura (RAK)	TTTATGTTGAGCCAGCAGAGAGATA<T>ATTAAAGACCGAACTCTGCCATTTC	A	From T to A						KKH SaCas9 NNNRRT on 22					LbCas12a & AsCas12a comp. TTTV on 24				SpCas9-NRRH NRRH on 23 SpCas9-NRRH NRRH on 24						FnCas12a comp. TTV on 25
rs747259064	ADAM22	53616	pathogenic	Early infantile epileptic encephalopathy 61 (EIEE61)	AAATGCGAGGACACGTGGTCCGGGT<G>CATAATGGGAGACACTGGGTGAGCC	A	From G to A										CjCas9 NNNVRYM on 19									enAsCas12a comp. TGTV on 23							SpCas9-NRTH NRTH on 22 SpCas9-NRTH comp. NRTH on 23
rs137853041_0	ADAM9	8754	pathogenic		CTCTCATTTTGAGCACATCATTTAT<C>GAATGGATGATGTCTACAAAGAGCC	G	From C to G	SpCas9 NGG on 24							St1Cas9 NNRGAAW on 23				SpCas9-NG NANG on 22			SpCas9-NRRH NRRH on 24			AsCas12a RR comp. TYCV on 23						SpCas9-NRRH NGGN on 24 SpCas9-NRTH NGGN on 24 SpCas9-NRCH NGGN on 24	xCas9 NG on 24 SpCas9-NG NG on 24
rs137853041_1	ADAM9	8754	pathogenic	Cone-rod dystrophy 9 (CORD9)	CTCTCATTTTGAGCACATCATTTAT<C>GAATGGATGATGTCTACAAAGAGCC	T	From C to T																				enAsCas12a VTTV on 23	FnCas12a TTV on 24
rs137853040	ADAM9	8754	pathogenic	Cone-rod dystrophy 9 (CORD9)	CCAGATGTATATTATGTTAAATATT<C>GAATTGTGCTAGTTGGACTGGAGAT	T	From C to T											LbCas12a & AsCas12a TTTV on 23										FnCas12a TTV on 24
rs267606637	ADAMTS10	81794	pathogenic		GGAGGACAAGTGCCGAGTGTGTGGC<G>GTGACGGCAGTGCCTGCGAGACCAT	A	From G to A										CjCas9 NNNVRYM on 19						SpCas9-NRCH NRCH on 22
rs121434359	ADAMTS10	81794	pathogenic	Weill-Marchesani syndrome 1 (WMS1)	GTCCCTGGACAGCTTCTGTAAGTGG<C>AGAAATCCATCGTGAACCACAGCGG	T	From C to T						KKH SaCas9 NNNRRT on 20																				SpCas9-NRTH NRTH on 23
rs886041104	ADAMTS10	81794	pathogenic	Weill-Marchesani syndrome 1 (WMS1)	GCCCTGGACCAAGTGCTCGGCCCAG<T>GTGCAGGCGGTGAGGCCGGGGGTGG	C	From T to C		VRER SpCas9 NGCG on 23										SpCas9-NG comp. NANG on 22													xCas9 comp. NG on 24 SpCas9-NG comp. NG on 24
rs121434358	ADAMTS10	81794	pathogenic	Weill-Marchesani syndrome 1 (WMS1)	GGGCCTCATGTTCGAGGTCACGCAC<G>CCTTCCGGTCTCAAGGTAGGGGAAG	A	From G to A						KKH SaCas9 comp. NNNRRT on 20				CjCas9 NNNVRYM on 19						SpCas9-NRCH NRCH on 22			enAsCas12a comp. TGTV on 25
rs267606636	ADAMTS10	81794	pathogenic	Weill-Marchesani syndrome 1 (WMS1)	ACCAACAGCATCCCGGCCGCCGAGG<G>CACGCTGTGCCAGACGCACACCATC	A	From G to A				VQR SpCas9 NGAN on 23											SpCas9-NRRH NRRH on 22				enAsCas12a comp. TGTV on 23							SpCas9-NRTH comp. NRTH on 23
rs121908469	ADAMTS13	11093	pathogenic	Upshaw-Schulman syndrome (TTP)	CCAGGCTCACCAGGAGGACACAGAG<C>GCTATGTGCTCACCAACCTCAACAT	T	From C to T					SaCas9 NNGRRT on 20	KKH SaCas9 NNNRRT on 20				CjCas9 comp. NNNVRYM on 19						SpCas9-NRCH comp. NRCH on 22
rs121908471	ADAMTS13	11093	pathogenic	Upshaw-Schulman syndrome (TTP)	TGGGGTCCCCGAAGTCCTTGCTCCC<G>CTCCTGCGGAGGAGGTGTGGTCACC	A	From G to A					SaCas9 comp. NNGRRT on 20	KKH SaCas9 comp. NNNRRT on 20
rs281875287	ADAMTS13	11093	likely-pathogenic.not-provided	Upshaw-Schulman syndrome (TTP)	GTTGCCTGATGGTAACCGGCAGGTG<C>GGGGCGTCACCCAGCTGGGCGGTGC	T	From C to T																			enAsCas12a TGTV on 23
rs121908478	ADAMTS13	11093	pathogenic	Upshaw-Schulman syndrome (TTP)	TGCGGCCCCAGCGGACACGTGATGG<C>TTCGGACGGCGCCGCGCCCCGCGCC	T	From C to T						KKH SaCas9 NNNRRT on 20					LbCas12a & AsCas12a TTTV on 25				SpCas9-NRRH comp. NRRH on 22											SpCas9-NRTH NRTH on 23
rs2301612	ADAMTS13	11093	benign.pathogenic	Upshaw-Schulman syndrome (TTP). Upshaw-Schulman syndrome (TTP)	GAAGACCCAGCTGGAGTTCATGTCG<C>AACAGTGCGCCAGGACCGACGGCCA	G	From C to G	SpCas9 NGG on 23			VQR SpCas9 NGAN on 24											SpCas9-NRRH NRRH on 23 SpCas9-NRRH NRRH on 24			AsCas12a RR comp. TYCV on 23 AsCas12a RR comp. TYCV on 24					enAsCas12a comp. TTCN on 23 Cas12e (CasX) comp. TTCN on 23	SpCas9-NRRH NGGN on 23 SpCas9-NRTH NGGN on 23	xCas9 NG on 24 SpCas9-NG NG on 24
rs121908468	ADAMTS13	11093	pathogenic	Upshaw-Schulman syndrome (TTP)	GCGGGAGGTCTGCCAGGCTGTCCCG<T>GCCCTGCTCGGTGAGTGAGGGGAGC	G	From T to G	SpCas9 NGG on 23 SpCas9 NGG on 24									CjCas9 NNNVRYM on 22					SpCas9-NRRH NRRH on 24									SpCas9-NRRH NGGN on 23 SpCas9-NRTH NGGN on 23 SpCas9-NRCH NGGN on 23 SpCas9-NRRH NGGN on 24 SpCas9-NRTH NGGN on 24 SpCas9-NRCH NGGN on 24	xCas9 NG on 24 SpCas9-NG NG on 24
rs121908475	ADAMTS13	11093	pathogenic	Upshaw-Schulman syndrome (TTP)	GCAGGCCTGGGTGTGGGCCGCTGTG<C>GTGGGCCCTGCTCGGTGAGCTGTGG	T	From C to T										CjCas9 comp. NNNVRYM on 19						SpCas9-NRCH comp. NRCH on 22			enAsCas12a TGTV on 23 enAsCas12a TGTV on 25
rs121908477	ADAMTS13	11093	pathogenic		CTCGCCTGGTCCCCCTGCAGCCGCC<G>GCAGCTGCTGAGCCTGCTCAGGTAG	T	From G to T												SpCas9-NG comp. NANG on 24
rs121908474	ADAMTS13	11093	pathogenic	Upshaw-Schulman syndrome (TTP)	ATGCGAGGCCCAGGGCAGGCAGACT<G>TGCAGTGGCCATTGGGCGGCCCCTC	A	From G to A																	AsCas12a RVR TATV on 24									SpCas9-NRTH comp. NRTH on 23
rs121908473	ADAMTS13	11093	pathogenic	Upshaw-Schulman syndrome (TTP)	GAGCCTGTGTGTGTCGGGCAGCTGC<A>GGGTAGGCGTGTGTGGACATTGGCG	G	From A to G		VRER SpCas9 NGCG on 22								CjCas9 comp. NNNVRYM on 22														SpCas9-NRRH NGGN on 24 SpCas9-NRTH NGGN on 24 SpCas9-NRCH NGGN on 24	xCas9 NG on 24 SpCas9-NG NG on 24		St3Cas9 NGGNG on 24
rs121908476	ADAMTS13	11093	pathogenic	Upshaw-Schulman syndrome (TTP)	GACCCAGCTGGAGTTCATGTCGCAA<C>AGTGCGCCAGGACCGACGGCCAGCC	T	From C to T						KKH SaCas9 NNNRRT on 20																				SpCas9-NRTH NRTH on 23
rs121908472	ADAMTS13	11093	pathogenic	Upshaw-Schulman syndrome (TTP)	GTGGAAAGTCATGTCCCTTGGCCCA<T>GTTCGGCCAGCTGTGGCCTTGGCAC	G	From T to G	SpCas9 NGG on 24					KKH SaCas9 NNNRRT on 22									SpCas9-NRRH NRRH on 24									SpCas9-NRRH NGGN on 24 SpCas9-NRTH NGGN on 24 SpCas9-NRCH NGGN on 24	xCas9 NG on 24 SpCas9-NG NG on 24
rs121908467	ADAMTS13	11093	pathogenic	Upshaw-Schulman syndrome (TTP)	CGTGGGCCCCGATGTCTTCCAGGCT<C>ACCAGGAGGACACAGAGCGCTATGT	G	From C to G				VQR SpCas9 NGAN on 24						CjCas9 comp. NNNVRYM on 19					SpCas9-NRRH NRRH on 24										xCas9 NG on 24 SpCas9-NG NG on 24	SpCas9-NRTH comp. NRTH on 22
rs281875305	ADAMTS13	11093	pathogenic.not-provided	Upshaw-Schulman syndrome (TTP)	GACAGCTTCCTCGATGGGACCCGGT<G>TATGCCAAGTGGCCCCCGGGAGGAC	A	From G to A										CjCas9 NNNVRYM on 19							AsCas12a RVR TATV on 24 AsCas12a RVR comp. TATV on 23									SpCas9-NRTH NRTH on 22 SpCas9-NRTH comp. NRTH on 23
rs121908470	ADAMTS13	11093	pathogenic	Upshaw-Schulman syndrome (TTP)	GGTAACCGGCAGGTGCGGGGCGTCA<C>CCAGCTGGGCGGTGCCTGCTCCCCA	T	From C to T				VQR SpCas9 comp. NGAN on 23											SpCas9-NRRH comp. NRRH on 22			AsCas12a RR TYCV on 25								SpCas9-NRTH NRTH on 23
rs397515468	ADAMTS18	170692	pathogenic	Microcornea. myopic chorioretinal atrophy. and telecanthus (MMCAT)	CCTGCGGGTCACCATCCTCACGTAC<T>GTACAAAAGGACAGCAGAGGAGAAG	C	From T to C										CjCas9 NNNVRYM on 22		SpCas9-NG comp. NANG on 22												SpCas9-NRTH comp. NGGN on 24 SpCas9-NRCH comp. NGGN on 24	xCas9 comp. NG on 24 SpCas9-NG comp. NG on 24
rs148319220_0	ADAMTS18	170692	pathogenic	Microcornea. myopic chorioretinal atrophy. and telecanthus (MMCAT)	CACAGTGGTGTCGGCAAGGCCAGTG<C>GTAAAGTTTGGGGAGCTCGGGCCCC	G	From C to G	SpCas9 NGG on 23 SpCas9 NGG on 24				SaCas9 NNGRRT on 22	KKH SaCas9 NNNRRT on 22									SpCas9-NRRH NRRH on 24	SpCas9-NRCH comp. NRCH on 22								SpCas9-NRRH NGGN on 23 SpCas9-NRTH NGGN on 23 SpCas9-NRCH NGGN on 23 SpCas9-NRRH NGGN on 24 SpCas9-NRTH NGGN on 24 SpCas9-NRCH NGGN on 24	xCas9 NG on 24 SpCas9-NG NG on 24
rs148319220_1	ADAMTS18	170692	pathogenic		CACAGTGGTGTCGGCAAGGCCAGTG<C>GTAAAGTTTGGGGAGCTCGGGCCCC	T	From C to T																SpCas9-NRCH comp. NRCH on 22			enAsCas12a TGTV on 23 enAsCas12a TGTV on 25
rs397515467	ADAMTS18	170692	pathogenic		TCGATGCAAACTGTACTGCAAGGCT<G>AGAACTTTGAATTTTTTTTTGCAAT	A	From G to A																				enAsCas12a comp. VTTV on 23	FnCas12a comp. TTV on 24
rs137853147	ADAMTS2	9509	likely-pathogenic	Ehlers-Danlos syndrome. type vii. autosomal recessive (EDSDERMS)	ACCTTCATTGCCATGGGCGTGGAGT<G>GGAGTACAGAGACGAGGACGGCCGG	A	From G to A										CjCas9 NNNVRYM on 19																SpCas9-NRTH NRTH on 22
rs137853146	ADAMTS2	9509	pathogenic	Ehlers-Danlos syndrome. type vii. autosomal recessive (EDSDERMS)	CACGTCCCCTCCTCTCGGGGGGCCA<C>AGGCCCTGGACACAGGTGAGGCTAC	T	From C to T																	AsCas12a RVR comp. TATV on 24									SpCas9-NRTH NRTH on 23
rs387907064	ADAMTSL2	9719	pathogenic	Geleophysic dysplasia 1 (GPHYSD1)	GGGGGTGGGGTGACATCCCAGGAGC<G>GCACTGCCTGCAGCAGAGGTGCGAG	A	From G to A										CjCas9 NNNVRYM on 19						SpCas9-NRCH NRCH on 22
rs113994123	ADAMTSL2	9719	pathogenic	Geleophysic dysplasia 1 (GPHYSD1)	TCCGCCGGACGGGAGGAGCTTCCGC<G>AGGAGCAGTGCGTCTCCTTCAACTC	A	From G to A										CjCas9 NNNVRYM on 19						SpCas9-NRCH NRCH on 22				enAsCas12a comp. VTTV on 23	FnCas12a comp. TTV on 24
rs113994122	ADAMTSL2	9719	pathogenic		TGTCCGCCGGACGGGAGGAGCTTCC<G>CGAGGAGCAGTGCGTCTCCTTCAAC	T	From G to T			EQR SpCas9 comp. NGAG on 23	VQR SpCas9 comp. NGAN on 23								SpCas9-NG comp. NANG on 24
rs113994121	ADAMTSL2	9719	pathogenic	Geleophysic dysplasia 1 (GPHYSD1)	GACTATGTCCACATCTCCAGCAAAC<C>GTGTGACCTGCACTGTACCACCGTG	T	From C to T										CjCas9 comp. NNNVRYM on 19						SpCas9-NRCH comp. NRCH on 22			enAsCas12a TGTV on 25
rs387907065	ADAMTSL2	9719	pathogenic	Geleophysic dysplasia 1 (GPHYSD1)	CTGCACCCACGTGACGGGCAACTAT<C>GCAAGGGGAATGCCCACCTTGGTAA	T	From C to T																SpCas9-NRCH comp. NRCH on 22				enAsCas12a VTTV on 23	FnCas12a TTV on 24
rs775621284	ADAMTSL2	9719	pathogenic	Geleophysic dysplasia 1 (GPHYSD1)	CACTCCGAGCCTGCATCTTTCTGCC<A>GGAGGAAGTCCGTCCCGGGCCCCGG	G	From A to G																		AsCas12a RR comp. TYCV on 22						SpCas9-NRRH NGGN on 24 SpCas9-NRTH NGGN on 24 SpCas9-NRCH NGGN on 24	xCas9 NG on 24 SpCas9-NG NG on 24
rs113994125	ADAMTSL2	9719	pathogenic	Geleophysic dysplasia 1 (GPHYSD1)	GCTTCAAGTGGTACACCAGCCCCTG<G>TCAGAGGTGAGCTCCCAGCCGGCCC	A	From G to A				VQR SpCas9 NGAN on 23		KKH SaCas9 comp. NNNRRT on 20																				SpCas9-NRTH comp. NRTH on 23
rs113994124	ADAMTSL2	9719	pathogenic	Geleophysic dysplasia 1 (GPHYSD1)	CCGGCCTCAGTGCAACACCACCTGC<G>GGCGCGGGGTCAAGAAGCGGCTGGT	A	From G to A																SpCas9-NRCH NRCH on 22
rs757318536	ADAMTSL4	54507	pathogenic		AGGGAGAGAGGAGACCCAGGAGATT<C>GAGCGGCCAGGAGGTGAGAGGCCTG	T	From C to T											LbCas12a & AsCas12a TTTV on 23										FnCas12a TTV on 24
rs118203985	ADAMTSL4	54507	pathogenic	Ectopia lentis. isolated autosomal recessive (ECTOL2)	AGGAGGAAAACCCAGGCGTTTTTTA<T>CAGTATGTCATCTCTTCACCTCCTC	G	From T to G										CjCas9 NNNVRYM on 21					SpCas9-NRRH NRRH on 23	SpCas9-NRCH NRCH on 24 SpCas9-NRCH comp. NRCH on 23									xCas9 NG on 24 SpCas9-NG NG on 24
rs781691587	ADAMTSL4	54507	likely-pathogenic		GAGTGTGGGACGGGAATCCAGCGGC<G>CTCTGTGGTCTGCCTTGGGAGTGGG	A	From G to A					SaCas9 comp. NNGRRT on 20	KKH SaCas9 comp. NNNRRT on 20				CjCas9 NNNVRYM on 19						SpCas9-NRCH NRCH on 22
rs368482584	ADAMTSL4	54507	pathogenic	Ectopia lentis. isolated autosomal recessive (ECTOL2)	GGGGTCTCCAGCTGCGTACTGGAAA<C>GAGTGGGACACTCTGCATGCTCAGC	T	From C to T						KKH SaCas9 NNNRRT on 20
rs28936680	ADAR	103	pathogenic	Symmetrical dyschromatosis of extremities (DSH)	ACCAGACTTTCTTTTTGTAGGTTTC<T>CTACAGTGAGTTAATGAAATACAAC	C	From T to C	SpCas9 comp. NGG on 23											SpCas9-NG comp. NANG on 22						AsCas12a RR TYCV on 22 AsCas12a RR TYCV on 23						SpCas9-NRRH comp. NGGN on 23 SpCas9-NRTH comp. NGGN on 23 SpCas9-NRCH comp. NGGN on 23 SpCas9-NRTH comp. NGGN on 24 SpCas9-NRCH comp. NGGN on 24	xCas9 comp. NG on 24 SpCas9-NG comp. NG on 24
rs28936681	ADAR	103	pathogenic	Symmetrical dyschromatosis of extremities (DSH)	TCCAAAAAGAACATTTTTCTTCTAT<T>TAAGAAGCTCTGCTCCTTCCGTTAC	C	From T to C				VQR SpCas9 comp. NGAN on 24													AsCas12a RVR TATV on 22								xCas9 comp. NG on 24 SpCas9-NG comp. NG on 24
rs121912422	ADAR	103	pathogenic	Symmetrical dyschromatosis of extremities (DSH)	TAAGGGAGGAGAAAAGCTCCAAATA<A>AAAAGACTGTGTCATTCCATCTGTA	T	From A to T											LbCas12a & AsCas12a comp. TTTV on 22						AsCas12a RVR TATV on 23 AsCas12a RVR comp. TATV on 24				FnCas12a comp. TTV on 23					SpCas9-NRTH NRTH on 23 SpCas9-NRTH comp. NRTH on 24
rs121912423_0	ADAR	103	pathogenic		GACCAACTCCATGGCTTCTGATAAC<C>AGGTAGGGCGTTTTCCTACTCAAAA	G	From C to G			EQR SpCas9 NGAG on 24	VQR SpCas9 NGAN on 24								SpCas9-NG NANG on 22													xCas9 NG on 24 SpCas9-NG NG on 24
rs1064796761	ADAR	103	likely-pathogenic		GGCCAAGAAAGCTGCCCGTGACTAC<G>AGACGGCCAAGAACTACTTCAAAAA	A	From G to A																SpCas9-NRCH NRCH on 22			enAsCas12a comp. TGTV on 25	enAsCas12a comp. VTTV on 23	FnCas12a comp. TTV on 24
rs121912421	ADAR	103	pathogenic	Symmetrical dyschromatosis of extremities (DSH)	TATCCGCGCAGCACCAGGTGAGTTT<C>GAGCCATCATGGAGATGCCCTCCTT	T	From C to T									TdCas9 comp. NAAAAC on 24		LbCas12a & AsCas12a TTTV on 23										FnCas12a TTV on 24	enAsCas12a TTTT on 22
rs145588689	ADAR	103	likely-benign.conflicting-interpretations-of-pathogenicity.pathogenic	Aicardi-Goutieres syndrome 6 (AGS6). Symmetrical dyschromatosis of extremities (DSH). Aicardi Goutieres syndrome (AGS). Symmetrical dyschromatosis of extremities (DSH). Aicardi-Goutieres syndrome 6 (AGS6). Inborn genetic diseases	GCTACAGAAAGAGGCAGGAACACCC<C>CTTTGTGGAAAATCGCGGTCTCCAC	G	From C to G		VRER SpCas9 comp. NGCG on 23													SpCas9-NRRH comp. NRRH on 22	SpCas9-NRCH NRCH on 24									xCas9 NG on 24 SpCas9-NG NG on 24
rs768943773_0	ADAR	103	pathogenic		TAAATTCCAGGTTGTCATCAATGGC<C>GAGAGTTTCCCCCAGCTGAAGCTGG	A	From C to A															SpCas9-NRRH NRRH on 24
rs398122822	ADAR	103	likely-pathogenic.pathogenic-likely-pathogenic	Symmetrical dyschromatosis of extremities (DSH). Aicardi-Goutieres syndrome 6 (AGS6). Symmetrical dyschromatosis of extremities (DSH). Aicardi-Goutieres syndrome 6 (AGS6)	AAAGCTCCGCACCAAGGTGGAGAAC<G>GTGAGTGATACATGCCCCCGCCTCC	A	From G to A										CjCas9 NNNVRYM on 19						SpCas9-NRCH NRCH on 22
rs119468006_1	ADCK3	56997	pathogenic	Coenzyme Q10 deficiency. primary. 4 (COQ10D4)	GTGCGCACGCTCTGCAAGGTGCGTG<G>TGCGGCACTCAAGCTGGGCCAGATG	A	From G to A				VQR SpCas9 NGAN on 23									SpCas9 (From Strep. past.) NNGTGA on 20													SpCas9-NRTH comp. NRTH on 23
rs864309484	ADCY5	111	pathogenic	Dyskinesia. familial. with facial myokymia (FDFM)	CAGGCCACAGAGGAGAAAGAGGAGA<T>GGAGGAGCTGCAGGCCTACAACCGG	A	From T to A												SpCas9-NG NANG on 24								enAsCas12a comp. VTTV on 24	FnCas12a comp. TTV on 25		enAsCas12a comp. TTCN on 25 Cas12e (CasX) comp. TTCN on 25
rs1057520218	ADCY5	111	likely-pathogenic		CAACCAGGTGTCCAAGGAGATGAAG<C>GGATGGTGAGTGGCTGGTGGGGCAG	T	From C to T						KKH SaCas9 NNNRRT on 20
rs757156390	ADCY5	111	pathogenic		CCCCCAGCATCCTGTTTGCTGACAT<C>GAGGGCTTCACCAGCCTGGCGTCCC	T	From C to T																				enAsCas12a VTTV on 23	FnCas12a TTV on 24
rs864309515	ADCY5	111	pathogenic	Dyskinesia. familial. with facial myokymia (FDFM)	GAGACCCGAGAGTGCATCCAGGCGC<G>GCTCCACTCGCAGCGGGAGAACCAG	A	From G to A										CjCas9 NNNVRYM on 19						SpCas9-NRCH NRCH on 22
rs1085308027	ADCY5	111	likely-pathogenic		ACCTGGGTGGCAACCAGGTGTCCAA<G>GAGATGAAGCGGATGGTGAGTGGCT	T	From G to T						KKH SaCas9 NNNRRT on 20									SpCas9-NRRH NRRH on 22											SpCas9-NRTH comp. NRTH on 24
rs796065306	ADCY5	111	pathogenic	Dyskinesia. familial. with facial myokymia (FDFM)	TGAGTTTCTGGGCCGTGCCATTGAC<G>CCAGGAGCATTGATAGGCTTCGGTC	A	From G to A						KKH SaCas9 comp. NNNRRT on 20				CjCas9 NNNVRYM on 19						SpCas9-NRCH NRCH on 22			enAsCas12a comp. TGTV on 25
rs879253864	ADCY6	112	likely-pathogenic	Lethal congenital contracture syndrome 8 (LCCS8)	TCCATTGCCAACTTCTCTGAGTTCT<A>TGTGGAGCTGGAGGCAAACAATGAG	G	From A to G																SpCas9-NRCH comp. NRCH on 23			enAsCas12a TGTV on 24						xCas9 NG on 24 SpCas9-NG NG on 24
rs786204798	ADCY6	112	pathogenic	Lethal congenital contracture syndrome 8 (LCCS8)	GGGGAACACAGTGAATGTCTCTAGT<C>GTATGGACAGCACGGGGGTCCCCGA	T	From C to T																SpCas9-NRCH comp. NRCH on 22			enAsCas12a TGTV on 25	enAsCas12a VTTV on 23	FnCas12a TTV on 24
rs564185858	ADD3	120	pathogenic	Cerebral palsy. spastic quadriplegic. 3 (CPSQ3). Cerebral palsy	GGTTCCCATCAAAAATGGAAGGTTG<G>CGAAATTGAGTTTGAAGGGCTTATG	A	From G to A				VQR SpCas9 NGAN on 23																						SpCas9-NRTH comp. NRTH on 23
rs778361520	ADGRB2	576	likely-pathogenic	Progressive spastic paraparesis	TGCTCCTTCCCAGCGAAAGAAATTA<C>GGTATTCAGACCTGGACTTTGAGGT	T	From C to T																	AsCas12a RVR TATV on 23
rs199718602	ADGRE2	30817	pathogenic	Vibratory urticaria (VBU)	TTCTGGGAGCATGGCCAGAATGGAT<G>TGGTCACTGGGCCACCACAGGCTGC	A	From G to A										CjCas9 NNNVRYM on 19							AsCas12a RVR TATV on 24 AsCas12a RVR comp. TATV on 25									SpCas9-NRTH NRTH on 22 SpCas9-NRTH comp. NRTH on 23
rs587783658	ADGRG1	9289	pathogenic		CTTCCCTGACCCCAGGGGCCTCTAC<C>ACTTCTGCCTCTACTGGAACCGACA	A	From C to A															SpCas9-NRRH NRRH on 24				enAsCas12a comp. TGTV on 25	enAsCas12a comp. VTTV on 23	FnCas12a comp. TTV on 24					SpCas9-NRTH comp. NRTH on 22
rs587783655	ADGRG1	9289	pathogenic	Polymicrogyria. bilateral frontoparietal (BFPP)	TCGTGGTGGAGGTCTTTGGCACCTA<T>GTCCCTGGCTACCTACTCAAGCTGA	G	From T to G	SpCas9 NGG on 24					KKH SaCas9 NNNRRT on 22				CjCas9 NNNVRYM on 22					SpCas9-NRRH NRRH on 24									SpCas9-NRRH NGGN on 24 SpCas9-NRTH NGGN on 24 SpCas9-NRCH NGGN on 24	xCas9 NG on 24 SpCas9-NG NG on 24
rs121908462_0	ADGRG1	9289	pathogenic		GGAAGACTTTCGCTTCTGCAGCCAG<C>GGAACCAGACACACAGGAGCAGCCT	A	From C to A			EQR SpCas9 NGAG on 23	VQR SpCas9 NGAN on 23								SpCas9-NG NANG on 24
rs121908462_1	ADGRG1	9289	pathogenic	Polymicrogyria. bilateral frontoparietal (BFPP)	GGAAGACTTTCGCTTCTGCAGCCAG<C>GGAACCAGACACACAGGAGCAGCCT	T	From C to T						KKH SaCas9 NNNRRT on 20
rs142684762	ADGRG1	9289	likely-pathogenic	Inborn genetic diseases	CTGCTGCTGGCCGTCTTCCTGCTGG<A>CACGAGCTTCCTGCTCAGCGAGCCG	G	From A to G	SpCas9 NGG on 23															SpCas9-NRCH comp. NRCH on 23								SpCas9-NRTH NGGN on 23 SpCas9-NRCH NGGN on 23	xCas9 NG on 24 SpCas9-NG NG on 24
rs1305914929	ADGRG1	9289	pathogenic		ACATCCTGCTTCTGCAACCACTTGA<C>CTACTTTGCAGTGCTGATGGTGAGG	T	From C to T				VQR SpCas9 comp. NGAN on 23		KKH SaCas9 NNNRRT on 20									SpCas9-NRRH comp. NRRH on 22											SpCas9-NRTH NRTH on 23
rs121908465	ADGRG1	9289	pathogenic	Polymicrogyria. bilateral frontoparietal (BFPP)	GACCCCAGGGGCCTCTACCACTTCT<G>CCTCTACTGGAACCGACATGCTGGG	C	From G to C	SpCas9 comp. NGG on 23		EQR SpCas9 comp. NGAG on 24	VQR SpCas9 comp. NGAN on 24											SpCas9-NRRH comp. NRRH on 23			AsCas12a RR TYCV on 24						SpCas9-NRRH comp. NGGN on 23 SpCas9-NRTH comp. NGGN on 23	xCas9 comp. NG on 24 SpCas9-NG comp. NG on 24		St3Cas9 comp. NGGNG on 23
rs121908466	ADGRG1	9289	pathogenic	Polymicrogyria. bilateral frontoparietal (BFPP)	TCCTTCCCTGACCCCAGGGGCCTCT<A>CCACTTCTGCCTCTACTGGAACCGA	G	From A to G																SpCas9-NRCH comp. NRCH on 23									xCas9 NG on 24 SpCas9-NG NG on 24
rs587783652_0	ADGRG1	9289	pathogenic		CCTGACAGGCTCTGAGGCTGGCTGC<C>GAGCCAGTGCCATCTTCCTGCACTT	G	From C to G	SpCas9 NGG on 24	VRER SpCas9 NGCG on 22													SpCas9-NRRH NRRH on 24			AsCas12a RR comp. TYCV on 23						SpCas9-NRRH NGGN on 24 SpCas9-NRTH NGGN on 24 SpCas9-NRCH NGGN on 24	xCas9 NG on 24 SpCas9-NG NG on 24		St3Cas9 NGGNG on 24
rs587783653	ADGRG1	9289	pathogenic	Polymicrogyria. bilateral frontoparietal (BFPP)	GCCATCTTCCTGCACTTCTCCCTGC<T>CACCTGCCTTTCCTGGATGGGCCTC	C	From T to C	SpCas9 comp. NGG on 23																							SpCas9-NRRH comp. NGGN on 23 SpCas9-NRTH comp. NGGN on 23 SpCas9-NRCH comp. NGGN on 23 SpCas9-NRTH comp. NGGN on 24 SpCas9-NRCH comp. NGGN on 24	xCas9 comp. NG on 24 SpCas9-NG comp. NG on 24
rs532188689	ADGRG1	9289	likely-pathogenic	Polymicrogyria. bilateral frontoparietal (BFPP)	ACCTGCACATCCACTCCCGGCAGGA<G>GTCAGGGGCAGGCCTGGGCAGGAAG	C	From G to C										CjCas9 comp. NNNVRYM on 21		SpCas9-NG comp. NANG on 22			SpCas9-NRRH NRRH on 22										xCas9 comp. NG on 24 SpCas9-NG comp. NG on 24	SpCas9-NRTH comp. NRTH on 24
rs587783654	ADGRG1	9289	likely-pathogenic	Polymicrogyria. bilateral frontoparietal (BFPP)	CTCGAGGGGTACAACCTCTACCGAC<T>CGTGGTGGAGGTCTTTGGCACCTAT	C	From T to C	SpCas9 comp. NGG on 23									CjCas9 NNNVRYM on 19														SpCas9-NRRH comp. NGGN on 23 SpCas9-NRTH comp. NGGN on 23 SpCas9-NRCH comp. NGGN on 23 SpCas9-NRTH comp. NGGN on 24 SpCas9-NRCH comp. NGGN on 24	xCas9 comp. NG on 24 SpCas9-NG comp. NG on 24
rs587783656	ADGRG1	9289	likely-pathogenic	Polymicrogyria. bilateral frontoparietal (BFPP)	CTCAGCCTGGTCCTTGGCCTGCCCT<G>GGCCTTGATCTTCTTCTCCTTTGCT	C	From G to C			EQR SpCas9 comp. NGAG on 24	VQR SpCas9 comp. NGAN on 24																					xCas9 comp. NG on 24 SpCas9-NG comp. NG on 24
rs121908463	ADGRG1	9289	pathogenic	Polymicrogyria. bilateral frontoparietal (BFPP)	CCTACAGAAGAATGTGACTCTGCAA<T>GTGTGTTCTGGGTTGAAGACCCCAC	A	From T to A						KKH SaCas9 NNNRRT on 22					LbCas12a & AsCas12a comp. TTTV on 25				SpCas9-NRRH NRRH on 24
rs749355583_0	ADGRG6	57211	pathogenic		TCTTTGCAGGATGTTTCGCTCAGAT<C>GAATGTGGAGCTGCCATTGGAAATG	G	From C to G	SpCas9 NGG on 24							St1Cas9 NNRGAAW on 23				SpCas9-NG NANG on 22			SpCas9-NRRH NRRH on 24			AsCas12a RR comp. TYCV on 23						SpCas9-NRRH NGGN on 24 SpCas9-NRTH NGGN on 24 SpCas9-NRCH NGGN on 24	xCas9 NG on 24 SpCas9-NG NG on 24
rs749355583_1	ADGRG6	57211	pathogenic	Arthrogryposis multiplex congenita (AMC). Lethal congenital contracture syndrome 9 (LCCS9)	TCTTTGCAGGATGTTTCGCTCAGAT<C>GAATGTGGAGCTGCCATTGGAAATG	T	From C to T							NmCas9 NNNNGATT on 18													enAsCas12a VTTV on 23	FnCas12a TTV on 24
rs793888525	ADGRG6	57211	pathogenic	Arthrogryposis multiplex congenita (AMC). Lethal congenital contracture syndrome 9 (LCCS9)	CAAAGAAAAACTTTAGTGAGTTATG<T>GATGGCGTGCAGTATTGGAAACATT	A	From T to A			EQR SpCas9 NGAG on 23	VQR SpCas9 NGAN on 23											SpCas9-NRRH NRRH on 24
rs376689763_0	ADGRV1	84059	uncertain-significance.pathogenic	Usher syndrome. type 2C (USH2C)	CCACAGAAGGGGTTGAGGACTCATA<C>AAAGGTGCTACTATTGATCAGGACA	G	From C to G				VQR SpCas9 NGAN on 24				St1Cas9 NNRGAAW on 22							SpCas9-NRRH NRRH on 23 SpCas9-NRRH NRRH on 24								enAsCas12a comp. TTCN on 23 Cas12e (CasX) comp. TTCN on 23		xCas9 NG on 24 SpCas9-NG NG on 24
rs376689763_1	ADGRV1	84059	uncertain-significance.pathogenic		CCACAGAAGGGGTTGAGGACTCATA<C>AAAGGTGCTACTATTGATCAGGACA	T	From C to T																	AsCas12a RVR TATV on 23 AsCas12a RVR comp. TATV on 24									SpCas9-NRTH NRTH on 23
rs372147148	ADGRV1	84059	likely-pathogenic	Febrile seizures. familial. 1 (FEB1)	ATCGTTTCACATTATGTTACTAAAA<G>ATACCTTACAGGGAGATGCTGTGCT	T	From G to T						KKH SaCas9 NNNRRT on 20				CjCas9 NNNVRYM on 20					SpCas9-NRRH NRRH on 22		AsCas12a RVR TATV on 25									SpCas9-NRTH NRTH on 23 SpCas9-NRTH comp. NRTH on 24
rs758718347	ADGRV1	84059	pathogenic	Usher syndrome. type 2C (USH2C)	TTCCTGTGCTAATATAACTGTCAGG<C>GAAGGTATATGAGATAGCTACTTGC	T	From C to T						KKH SaCas9 NNNRRT on 20							SpCas9 (From Strep. past.) NNGTGA on 22
rs41303344	ADGRV1	84059	benign.likely-benign.likely-pathogenic	Usher syndrome	GGAGGAGCTGAGATTAACACCTCTA<G>GAATTCCATTGAGATCATCATTAAG	A	From G to A																				enAsCas12a comp. VTTV on 24	FnCas12a comp. TTV on 25
rs900228710	ADGRV1	84059	likely-pathogenic		TCATGATTTAATTTTTTTCCCAGAT<C>AGGTTTCATTGTTGCTGAAATTGAA	G	From C to G			EQR SpCas9 NGAG on 24	VQR SpCas9 NGAN on 24								SpCas9-NG NANG on 22													xCas9 NG on 24 SpCas9-NG NG on 24
rs727504777_0	ADGRV1	84059	pathogenic		TGAAACATCAGGAAAACTGACAATG<C>GAGACGAACAGTCTGCAGTCATTGT	G	From C to G	SpCas9 NGG on 23 SpCas9 NGG on 24														SpCas9-NRRH NRRH on 24			AsCas12a RR comp. TYCV on 23						SpCas9-NRRH NGGN on 23 SpCas9-NRTH NGGN on 23 SpCas9-NRCH NGGN on 23 SpCas9-NRRH NGGN on 24 SpCas9-NRTH NGGN on 24 SpCas9-NRCH NGGN on 24	xCas9 NG on 24 SpCas9-NG NG on 24		St3Cas9 NGGNG on 24
rs727504777_1	ADGRV1	84059	pathogenic	Usher syndrome. type 2C (USH2C)	TGAAACATCAGGAAAACTGACAATG<C>GAGACGAACAGTCTGCAGTCATTGT	T	From C to T													SpCas9 (From Strep. past.) NNGTGA on 22						enAsCas12a TGTV on 23
rs371947306	ADGRV1	84059	benign-likely-benign.likely-pathogenic	Usher syndrome. type 1 (USH1)	CTTTTTCTCATTGTCAGGTACCACA<G>GTTGAAGTGTATTTTTTTGTGGAAC	T	From G to T												SpCas9-NG comp. NANG on 24
rs768589991	ADGRV1	84059	pathogenic		TGGCCGATTTGCCTTTTCACATGAG<C>AACTTCGAGTGTCAGAAGCACAGAG	T	From C to T					SaCas9 NNGRRT on 20	KKH SaCas9 NNNRRT on 20																				SpCas9-NRTH NRTH on 23
rs769215629_0	ADGRV1	84059	pathogenic		AAGAAAATCATCTGTTACTGTTTAC<C>GATGGCAGGGGATTTTTATTCCAGT	A	From C to A															SpCas9-NRRH NRRH on 24				enAsCas12a comp. TGTV on 25
rs369793306_0	ADGRV1	84059	likely-pathogenic		ATCAATAATTATTCGGGGTGATAAG<C>GAGCATCAGGAGAAGTTGGGATAGC	G	From C to G	SpCas9 NGG on 23 SpCas9 NGG on 24											SpCas9-NG NANG on 22			SpCas9-NRRH NRRH on 24			AsCas12a RR comp. TYCV on 23						SpCas9-NRRH NGGN on 23 SpCas9-NRTH NGGN on 23 SpCas9-NRCH NGGN on 23 SpCas9-NRRH NGGN on 24 SpCas9-NRTH NGGN on 24 SpCas9-NRCH NGGN on 24	xCas9 NG on 24 SpCas9-NG NG on 24		St3Cas9 NGGNG on 24
rs369793306_1	ADGRV1	84059	likely-pathogenic	Usher syndrome. type 2C (USH2C)	ATCAATAATTATTCGGGGTGATAAG<C>GAGCATCAGGAGAAGTTGGGATAGC	T	From C to T						KKH SaCas9 NNNRRT on 20							SpCas9 (From Strep. past.) NNGTGA on 22
rs121909762_0	ADGRV1	84059	pathogenic.likely-pathogenic		GACCTTTGCCCCTGGGGAAACCATT<C>AAACCTTGTTGTTAGAGGTCCTGGC	G	From C to G				VQR SpCas9 NGAN on 24											SpCas9-NRRH NRRH on 24			AsCas12a RR comp. TYCV on 23					enAsCas12a comp. TTCN on 23 Cas12e (CasX) comp. TTCN on 23		xCas9 NG on 24 SpCas9-NG NG on 24
rs121909762_1	ADGRV1	84059	pathogenic.likely-pathogenic	Usher syndrome. type 2C (USH2C). Retinitis pigmentosa-deafness syndrome. Usher syndrome. Usher syndrome. type 2C (USH2C). Febrile seizures. familial. 4 (FEB4)	GACCTTTGCCCCTGGGGAAACCATT<C>AAACCTTGTTGTTAGAGGTCCTGGC	T	From C to T											LbCas12a & AsCas12a TTTV on 23										FnCas12a TTV on 24
rs121909761	ADGRV1	84059	pathogenic	Febrile seizures. familial. 4 (FEB4)	GGAGTTTTAAATTTTGCTCTTTCAT<C>AAGATTTGTGTTACTACAAGAGGCT	A	From C to A											LbCas12a & AsCas12a comp. TTTV on 23				SpCas9-NRRH NRRH on 24		AsCas12a RVR comp. TATV on 25				FnCas12a comp. TTV on 24
rs886039893	ADGRV1	84059	pathogenic	Usher syndrome. type 2C (USH2C)	TCCTGATGATTTCCCAGAGATGGAT<G>AGAGTTTTCTAATTTCTCTCCTTGA	T	From G to T						KKH SaCas9 comp. NNNRRT on 22	NmCas9 NNNNGATT on 18								SpCas9-NRRH comp. NRRH on 24					enAsCas12a VTTV on 23	FnCas12a TTV on 24					SpCas9-NRTH NRTH on 22
rs876657647	ADGRV1	84059	likely-pathogenic	Usher syndrome. type 2C (USH2C)	CAAAATGATTCTCCATTTGGAGTAT<T>TGGATTTGAAGAAAAGACTGTAAGT	G	From T to G										CjCas9 comp. NNNVRYM on 20		SpCas9-NG NANG on 22				SpCas9-NRCH comp. NRCH on 23	AsCas12a RVR TATV on 22		enAsCas12a TGTV on 24						xCas9 NG on 24 SpCas9-NG NG on 24
rs121909763	ADGRV1	84059	pathogenic	Usher syndrome. type 2C (USH2C)	TATCATCAGAGCATGTCACAGATCT<A>TGGACTCATTCATGGTGACCTGTAA	G	From A to G																SpCas9-NRCH comp. NRCH on 23			enAsCas12a TGTV on 24						xCas9 NG on 24 SpCas9-NG NG on 24
rs876657694	ADGRV1	84059	pathogenic	Usher syndrome. type 2C (USH2C)	GAACAAAGGAAAGGAGTTTTCCTGT<G>GACGTTTCCTAGCCCTGGTTGGCCA	A	From G to A																										SpCas9-NRTH NRTH on 22
rs200945405	ADGRV1	84059	likely-pathogenic.conflicting-interpretations-of-pathogenicity		ATTTTGAGGCACCGAGGATACTTTG<G>TAGTGTTTCTGTATCTTGGCAGCTC	T	From G to T										CjCas9 comp. NNNVRYM on 21					SpCas9-NRRH comp. NRRH on 23	SpCas9-NRCH comp. NRCH on 24				enAsCas12a VTTV on 24	FnCas12a TTV on 25					SpCas9-NRTH NRTH on 23
rs1338945655	ADGRV1	84059	pathogenic	Usher syndrome. type 2C (USH2C)	AAGGAAGTTTTCACTGTATTTTTAG<G>TTATCCAAGTGCAACTAACTGATGC	T	From G to T						KKH SaCas9 NNNRRT on 20					LbCas12a & AsCas12a TTTV on 25				SpCas9-NRRH NRRH on 22 SpCas9-NRRH comp. NRRH on 23	SpCas9-NRCH comp. NRCH on 24										SpCas9-NRTH NRTH on 23
rs1057519383	ADGRV1	84059	likely-pathogenic		CACCAGTGGATTTTTCACCATTGCT<G>ATGGAGAGAGTGAAGCTAGCTTTGA	A	From G to A																				enAsCas12a comp. VTTV on 23	FnCas12a comp. TTV on 24
rs1060499795	ADGRV1	84059	pathogenic	Usher syndrome. type 2C (USH2C)	AATATTTGCCGAAAATGTCTTTCTA<G>GTGAGAAGATAAAGTATTTGTAGTG	A	From G to A																				enAsCas12a comp. VTTV on 24	FnCas12a comp. TTV on 25
rs767570081	ADGRV1	84059	pathogenic		CACCACTCTTCAGTTACAAATAGCT<C>GAGATAAAGGACTACTTGGGGATAT	T	From C to T																				enAsCas12a VTTV on 23	FnCas12a TTV on 24
rs1057520080	ADGRV1	84059	likely-pathogenic		AAACCATCCTTGATAGTTGCCCATA<T>TTGTCAATATTGGCTCTTCACTGGT	G	From T to G						KKH SaCas9 NNNRRT on 21									SpCas9-NRRH NRRH on 23	SpCas9-NRCH comp. NRCH on 23				enAsCas12a VTTV on 25					xCas9 NG on 24 SpCas9-NG NG on 24	SpCas9-NRTH NRTH on 24
rs527236133	ADGRV1	84059	pathogenic	Usher syndrome. type 2C (USH2C)	TGGTGGAGGTACTATTGGGTTAGAT<C>GAATTGCAAATATTATTATTCCTGC	T	From C to T							NmCas9 NNNNGATT on 18													enAsCas12a VTTV on 23	FnCas12a TTV on 24
rs777309662	ADGRV1	84059	likely-pathogenic.pathogenic	Usher syndrome. Usher syndrome. type 2C (USH2C)	CGGTGGTGGCCAGCGACTCTCCCTA<T>GGCCGATTTGCCTTTTCACATGAGC	A	From T to A												SpCas9-NG NANG on 24								enAsCas12a comp. VTTV on 24	FnCas12a comp. TTV on 25
rs749956288_0	ADGRV1	84059	likely-pathogenic		TGAAGGAAAGGAAGGAGATTACATT<C>GAATTCCAGAGAGGCTACTGGATGT	A	From C to A								St1Cas9 NNRGAAW on 23							SpCas9-NRRH NRRH on 24
rs749956288_1	ADGRV1	84059	likely-pathogenic	Usher syndrome	TGAAGGAAAGGAAGGAGATTACATT<C>GAATTCCAGAGAGGCTACTGGATGT	T	From C to T											LbCas12a & AsCas12a TTTV on 23										FnCas12a TTV on 24
rs1060499796	ADGRV1	84059	pathogenic	Usher syndrome. type 2C (USH2C)	TCACCATTTACTCCCTTCCAGATGA<G>GTAAATATTGCATATAACTTTCTGC	A	From G to A															SpCas9-NRRH NRRH on 22			AsCas12a RR comp. TYCV on 25		enAsCas12a comp. VTTV on 24	FnCas12a comp. TTV on 25		enAsCas12a comp. TTCN on 25 Cas12e (CasX) comp. TTCN on 25
rs397517436	ADGRV1	84059	pathogenic	Usher syndrome. type 2C (USH2C)	CCCCAGTGTTTCTGGATGACATCAT<G>GATCAGCCCAGCTGTCAACAATTCA	A	From G to A										CjCas9 NNNVRYM on 19							AsCas12a RVR comp. TATV on 25									SpCas9-NRTH NRTH on 22
rs121917815	ADIPOQ	9370	pathogenic	Hypoadiponectinemia	ACCTGGAGAAGGTGCCTATGTATAC<C>GCTCAGCATTCAGTGTGGGATTGGA	T	From C to T										CjCas9 comp. NNNVRYM on 19						SpCas9-NRCH comp. NRCH on 22
rs397514452_0	ADK	132	pathogenic		ATTGATACCAATGGAGCTGGAGATG<C>ATTTGTTGGAGGTACAGACTAATTT	T	From C to T										CjCas9 comp. NNNVRYM on 19									enAsCas12a TGTV on 23							SpCas9-NRTH NRTH on 23 SpCas9-NRTH comp. NRTH on 22
rs397514452_1	ADK	132	pathogenic	Hypermethioninemia due to adenosine kinase deficiency	ATTGATACCAATGGAGCTGGAGATG<C>ATTTGTTGGAGGTACAGACTAATTT	A	From C to A				VQR SpCas9 NGAN on 23	SaCas9 NNGRRT on 22	KKH SaCas9 NNNRRT on 22									SpCas9-NRRH NRRH on 23 SpCas9-NRRH NRRH on 24			AsCas12a RR comp. TYCV on 24		enAsCas12a comp. VTTV on 23	FnCas12a comp. TTV on 24		enAsCas12a comp. TTCN on 24 Cas12e (CasX) comp. TTCN on 24			SpCas9-NRTH comp. NRTH on 22
rs397514453	ADK	132	pathogenic	Hypermethioninemia due to adenosine kinase deficiency	TTGATGAAAGTTATGCCTTATGTTG<A>TATACTTTTTGGAAATGAGACAGTG	C	From A to C										CjCas9 comp. NNNVRYM on 21					SpCas9-NRRH comp. NRRH on 23	SpCas9-NRCH NRCH on 23 SpCas9-NRCH comp. NRCH on 24									xCas9 comp. NG on 24 SpCas9-NG comp. NG on 24
rs786205458	ADK	132	likely-pathogenic		TTTTATTTCAGGAAGCTGCCACTTT<T>GCTAGAGAGCAAGGCTTTGAGGTGA	A	From T to A											LbCas12a & AsCas12a TTTV on 22				SpCas9-NRRH NRRH on 24						FnCas12a TTV on 23
rs397514454	ADK	132	pathogenic	Hypermethioninemia due to adenosine kinase deficiency	AGAGAAAATATTCTCTTTGGAATGG<G>AAATCCTCTGCTTGACATCTCTGCT	A	From G to A				VQR SpCas9 NGAN on 23				St1Cas9 NNRGAAW on 21			LbCas12a & AsCas12a comp. TTTV on 23				SpCas9-NRRH NRRH on 22			AsCas12a RR comp. TYCV on 25			FnCas12a comp. TTV on 24	enAsCas12a comp. TTTT on 22	enAsCas12a comp. TTCN on 24 Cas12e (CasX) comp. TTCN on 24
rs587777524_0	ADNP	23394	pathogenic	Helsmoortel-van der aa syndrome (HVDAS)	TCTGCTAATGCCTCTTCTCTCTCAT<C>GGGCCAGTTAAAGTCTCCTTCCCTC	A	From C to A												SpCas9-NG NANG on 24					AsCas12a RVR comp. TATV on 25
rs587777524_1	ADNP	23394	pathogenic		TCTGCTAATGCCTCTTCTCTCTCAT<C>GGGCCAGTTAAAGTCTCCTTCCCTC	T	From C to T																				enAsCas12a VTTV on 23	FnCas12a TTV on 24
rs1057518991	ADNP	23394	likely-pathogenic	Autism. severe. intellectual deficiency	AGAAGAGAGTAGTATTCACTGCAAG<C>GATGCCTTTTCATGCCAAAGTCCTA	T	From C to T						KKH SaCas9 NNNRRT on 20							SpCas9 (From Strep. past.) NNGTGA on 22
rs587777526	ADNP	23394	likely-pathogenic.pathogenic		GTCTGGCACCTGTGAAGCGCACTTA<C>GAGCAAATGGAATTTCCCTTACTGA	T	From C to T																	AsCas12a RVR TATV on 23
rs886042001	ADNP	23394	pathogenic		GAAATTGAGAAGCTAGCAGCCAGTT<T>ATGGTTATGGAAGAGTGACATCGCT	G	From T to G				VQR SpCas9 NGAN on 24		KKH SaCas9 NNNRRT on 22									SpCas9-NRRH NRRH on 24					enAsCas12a VTTV on 22	FnCas12a TTV on 23				xCas9 NG on 24 SpCas9-NG NG on 24
rs886041116	ADNP	23394	pathogenic.likely-pathogenic	Helsmoortel-van der aa syndrome (HVDAS). Global developmental delay (DD). Seizures. Aggressive behavior. Hypothyroidism. Stereotypy. Abnormality of the dentition. Growth hormone deficiency. Agenesis of corpus callosum. Inborn genetic diseases	AATGGAATTTCCCTTACTGAAAAAA<C>GAAAGTTAGATGATGATAGTGATTC	T	From C to T						KKH SaCas9 NNNRRT on 20
rs779340209	ADNP	23394	pathogenic	Inborn genetic diseases	CGAAAGTTAGATGATGATAGTGATT<C>ACCCAGCTTCTTTGAAGAGAAGCCT	G	From C to G				VQR SpCas9 NGAN on 24						CjCas9 comp. NNNVRYM on 19					SpCas9-NRRH NRRH on 24										xCas9 NG on 24 SpCas9-NG NG on 24	SpCas9-NRTH comp. NRTH on 22
rs796052248	ADSL	158	pathogenic		AGGGGGTGACAATGACCTCATAGAG<C>GTATCCAGGTTGATGCCTACTTCAG	T	From C to T					SaCas9 NNGRRT on 20	KKH SaCas9 NNNRRT on 20										SpCas9-NRCH comp. NRCH on 22			enAsCas12a TGTV on 25
rs777821034	ADSL	158	pathogenic	Adenylosuccinate lyase deficiency (ADSLD)	CCAGTTGGATCATTTACTGGATCCT<T>CTTCTTTCACTGGTCGTGCCTCCCA	C	From T to C	SpCas9 comp. NGG on 23		EQR SpCas9 comp. NGAG on 24	VQR SpCas9 comp. NGAN on 24								SpCas9-NG comp. NANG on 22												SpCas9-NRTH comp. NGGN on 23 SpCas9-NRCH comp. NGGN on 23	xCas9 comp. NG on 24 SpCas9-NG comp. NG on 24		St3Cas9 comp. NGGNG on 23
rs119450941	ADSL	158	pathogenic.likely-pathogenic	Adenylosuccinate lyase deficiency (ADSLD). Adenylosuccinate lyase deficiency (ADSLD)	GGGGGTGACAATGACCTCATAGAGC<G>TATCCAGGTTGATGCCTACTTCAGT	A	From G to A										CjCas9 NNNVRYM on 19						SpCas9-NRCH NRCH on 22	AsCas12a RVR comp. TATV on 23
rs1057521071	ADSL	158	likely-pathogenic	Adenylosuccinate lyase deficiency (ADSLD)	AGATTCTTAGAAGAGGAGGTGTATC<C>CCTGTTAAAACCATATGAAAGCGTG	G	From C to G		VRER SpCas9 comp. NGCG on 23								CjCas9 NNNVRYM on 21					SpCas9-NRRH comp. NRRH on 22	SpCas9-NRCH NRCH on 24									xCas9 NG on 24 SpCas9-NG NG on 24
rs1036185928	ADSL	158	likely-pathogenic	Adenylosuccinate lyase deficiency (ADSLD)	GGCAGCTGAGGAAGAGAAACGTTTA<C>GACATGATGTGATGGCTCACGTGCA	T	From C to T																	AsCas12a RVR TATV on 23
rs756210458	ADSL	158	pathogenic	Generalized myoclonic seizures. Progressive neurologic deterioration. Inability to walk. Difficulty standing. Severe global developmental delay	CTTGTAGCTTGCCAGAGTGATCTCT<C>GGCTTGCCGACTTTGCTAAGGAACG	T	From C to T																				enAsCas12a VTTV on 23	FnCas12a TTV on 24
rs119450945	ADSL	158	pathogenic	Adenylosuccinate lyase deficiency (ADSLD)	TCCAAGGTAGAGCAGCTTGACAAGA<T>GGTGACAGAAAAGGCAGGATTTAAG	C	From T to C																									xCas9 comp. NG on 24 SpCas9-NG comp. NG on 24
rs776496275	ADSL	158	likely-pathogenic	Adenylosuccinate lyase deficiency (ADSLD)	TGTCCAGTGGTTTGAACGCACACTG<G>ATGATAGTGCCAACCGGTCAGTGGC	C	From G to C												SpCas9-NG comp. NANG on 22				SpCas9-NRCH NRCH on 23 SpCas9-NRCH comp. NRCH on 24									xCas9 comp. NG on 24 SpCas9-NG comp. NG on 24
rs1057521795	ADSL	158	likely-pathogenic		GGAGGTGTATCCCCTGTTAAAACCA<T>ATGAAAGCGTGATGAAGGTGAAAGC	C	From T to C												SpCas9-NG comp. NANG on 22				SpCas9-NRCH NRCH on 23			enAsCas12a comp. TGTV on 24						xCas9 comp. NG on 24 SpCas9-NG comp. NG on 24
rs143083947	ADSL	158	pathogenic		TGGCGGGGTCGCAGGGTTGGGATGG<C>GGCTGGAGGCGATCATGGTTCGCCC	T	From C to T						KKH SaCas9 NNNRRT on 20
rs119450944	ADSL	158	likely-pathogenic	Adenylosuccinate lyase deficiency (ADSLD)	CATCACAGGGCAGACATATACACGA<A>AAGTGGATATTGAAGTACTGTCTGT	G	From A to G			EQR SpCas9 NGAG on 22	VQR SpCas9 NGAN on 24																enAsCas12a comp. VTTV on 22	FnCas12a comp. TTV on 23		enAsCas12a comp. TTCN on 23 Cas12e (CasX) comp. TTCN on 23		xCas9 NG on 24 SpCas9-NG NG on 24
rs373458753	ADSL	158	pathogenic	Adenylosuccinate lyase deficiency (ADSLD)	TAAGCGGAATCCCATGCGTTCAGAA<C>GTTGCTGCAGTCTTGCCCGCCACCT	T	From C to T					SaCas9 NNGRRT on 20	KKH SaCas9 NNNRRT on 20		St1Cas9 NNRGAAW on 19		CjCas9 comp. NNNVRYM on 19						SpCas9-NRCH comp. NRCH on 22
rs763542069	ADSL	158	pathogenic		GCCATGGTCAAAGCTGGAGGTAGCC<G>CCAGGTTTGTAACCCCTCATGTTCC	A	From G to A						KKH SaCas9 comp. NNNRRT on 20
rs119450940	ADSL	158	pathogenic	Adenylosuccinate lyase deficiency (ADSLD)	TGATGCCTACTTCAGTCCCATTCAC<T>CCCAGTTGGATCATTTACTGGATCC	C	From T to C	SpCas9 comp. NGG on 23									CjCas9 NNNVRYM on 19														SpCas9-NRRH comp. NGGN on 23 SpCas9-NRTH comp. NGGN on 23 SpCas9-NRCH comp. NGGN on 23 SpCas9-NRTH comp. NGGN on 24 SpCas9-NRCH comp. NGGN on 24	xCas9 comp. NG on 24 SpCas9-NG comp. NG on 24		St3Cas9 comp. NGGNG on 21 St3Cas9 comp. NGGNG on 24
rs796052246	ADSL	158	pathogenic		GGAGATGGAGGAACCCTTTGAAAAA<C>AGCAGATTGGTGAGTGCTGTGTAGA	G	From C to G			EQR SpCas9 NGAG on 24	VQR SpCas9 NGAN on 24								SpCas9-NG NANG on 22			SpCas9-NRRH NRRH on 23										xCas9 NG on 24 SpCas9-NG NG on 24
rs202064195	ADSL	158	likely-pathogenic.conflicting-interpretations-of-pathogenicity	Adenylosuccinate lyase deficiency (ADSLD)	CACCTGATGACCCTTGTCATGGACC<C>GCTACAGACAGCATCTGTCCAGTGG	T	From C to T										CjCas9 comp. NNNVRYM on 19						SpCas9-NRCH comp. NRCH on 22
rs372895468	ADSL	158	pathogenic		CATTTACTGGATCCTTCTTCTTTCA<C>TGGTCGTGCCTCCCAGCAGGTAAGC	G	From C to G						KKH SaCas9 NNNRRT on 21									SpCas9-NRRH NRRH on 23	SpCas9-NRCH comp. NRCH on 23									xCas9 NG on 24 SpCas9-NG NG on 24
rs28941471	ADSL	158	pathogenic	Adenylosuccinate lyase deficiency (ADSLD)	GATCTCCAGAACTTGAAGCGTGTCC<G>AGATGACCTGCGCTTCCGGGGAGTA	A	From G to A																				enAsCas12a comp. VTTV on 23	FnCas12a comp. TTV on 24
rs119450942	ADSL	158	pathogenic	Adenylosuccinate lyase deficiency (ADSLD)	CGTGCACACATTTGGCCACTGCTGT<C>CAAAAGCTGCAGGCATTATTCACCT	G	From C to G																SpCas9-NRCH NRCH on 24 SpCas9-NRCH comp. NRCH on 23									xCas9 NG on 24 SpCas9-NG NG on 24
rs796052247	ADSL	158	pathogenic		TAATTGAACGGCGCATTCGGCAAGA<G>CTGCCTTTCATGGCCACAGAGAACA	C	From G to C	SpCas9 comp. NGG on 23					KKH SaCas9 comp. NNNRRT on 21				CjCas9 NNNVRYM on 20 CjCas9 comp. NNNVRYM on 21		SpCas9-NG comp. NANG on 22			SpCas9-NRRH NRRH on 22 SpCas9-NRRH comp. NRRH on 23	SpCas9-NRCH NRCH on 23								SpCas9-NRRH comp. NGGN on 23 SpCas9-NRTH comp. NGGN on 23	xCas9 comp. NG on 24 SpCas9-NG comp. NG on 24	SpCas9-NRTH comp. NRTH on 24
rs374259530	ADSL	158	pathogenic	Adenylosuccinate lyase deficiency (ADSLD). Generalized myoclonic seizures. Progressive neurologic deterioration. Inability to walk. Difficulty standing. Severe global developmental delay	TATTCACCTTGGTGCTACTTCTTGC<T>ATGTTGGAGACAATACTGTAGGCGC	C	From T to C												SpCas9-NG comp. NANG on 22												SpCas9-NRTH comp. NGGN on 24 SpCas9-NRCH comp. NGGN on 24	xCas9 comp. NG on 24 SpCas9-NG comp. NG on 24
rs140614802	ADSSL1	122622	pathogenic	Myopathy. distal. 5 (MPD5)	GGAGGGTGCCAACGCCGCCCTCCTC<G>ACATTGACTTCGGTATGTCCGGGAG	A	From G to A																				enAsCas12a comp. VTTV on 23	FnCas12a comp. TTV on 24
rs777647845	AEBP1	165	pathogenic	EHLERS-DANLOS SYNDROME. CLASSIC-LIKE. 2 (EDSCLL2)	TCATGAAGGTGGTGAACGAGGAGTG<C>CCCACCATCACCCGCACTTACAGCC	A	From C to A				VQR SpCas9 NGAN on 23	SaCas9 comp. NNGRRT on 20	KKH SaCas9 comp. NNNRRT on 20				CjCas9 NNNVRYM on 21 CjCas9 comp. NNNVRYM on 20			SpCas9 (From Strep. past.) NNGTGA on 20		SpCas9-NRRH NRRH on 23 SpCas9-NRRH comp. NRRH on 22	SpCas9-NRCH NRCH on 24										SpCas9-NRTH comp. NRTH on 23
rs786205680	AFF4	27125	pathogenic	Chops syndrome (CHOPS)	GTTACAGAAACCCACTGCCTATGTG<C>GGCCCATGGACGGACAGGAGTCCAT	T	From C to T																			enAsCas12a TGTV on 23
rs786205233	AFF4	27125	pathogenic	Chops syndrome (CHOPS)	GTCCAATTCAATGTTACAGAAACCC<A>CTGCCTATGTGCGGCCCATGGACGG	G	From A to G		VRER SpCas9 comp. NGCG on 23																							xCas9 NG on 24 SpCas9-NG NG on 24
rs786205679	AFF4	27125	pathogenic	Chops syndrome (CHOPS)	TCCAATTCAATGTTACAGAAACCCA<C>TGCCTATGTGCGGCCCATGGACGGA	G	From C to G						KKH SaCas9 NNNRRT on 21									SpCas9-NRRH NRRH on 23	SpCas9-NRCH comp. NRCH on 23									xCas9 NG on 24 SpCas9-NG NG on 24
rs151344520	AFG3L2	10939	pathogenic	Spinocerebellar ataxia 28 (SCA28)	CATGGTATTGGAGAAACCTTACAGT<G>AAGCCACTGCAAGATTGATAGATGA	A	From G to A										CjCas9 NNNVRYM on 19	LbCas12a & AsCas12a comp. TTTV on 23										FnCas12a comp. TTV on 24					SpCas9-NRTH NRTH on 22
rs1064796804	AFG3L2	10939	likely-pathogenic		AGAAAAGTAACTCAGAGTGCATATG<C>CCAAGTGAGTATATGAAAGAGTGCA	T	From C to T				VQR SpCas9 comp. NGAN on 23											SpCas9-NRRH comp. NRRH on 22			AsCas12a RR TYCV on 25	enAsCas12a TGTV on 23							SpCas9-NRTH NRTH on 23
rs151344523	AFG3L2	10939	pathogenic.likely-pathogenic	Spinocerebellar ataxia 28 (SCA28)	GCAAGATTGATAGATGATGAAGTAC<G>AATACTTATTAATGATGCTTATAAA	A	From G to A											LbCas12a & AsCas12a comp. TTTV on 23					SpCas9-NRCH NRCH on 22			enAsCas12a comp. TGTV on 25		FnCas12a comp. TTV on 24
rs151344515	AFG3L2	10939	pathogenic	Spinocerebellar ataxia 28 (SCA28)	ATTTTTCAGATTGTTCAGTTTGGCA<T>GAATGAAAAGGTTGGGCAAATCTCC	G	From T to G	SpCas9 NGG on 24							St1Cas9 NNRGAAW on 23							SpCas9-NRRH NRRH on 24									SpCas9-NRRH NGGN on 24 SpCas9-NRTH NGGN on 24 SpCas9-NRCH NGGN on 24	xCas9 NG on 24 SpCas9-NG NG on 24
rs764254189	AFG3L2	10939	likely-pathogenic.benign		TACAACTGGTGCTCAAGATGACTTG<A>GAAAAGTAACTCAGAGTGCATATGC	C	From A to C		VRER SpCas9 NGCG on 23								CjCas9 comp. NNNVRYM on 21						SpCas9-NRCH comp. NRCH on 24		AsCas12a RR comp. TYCV on 22							xCas9 comp. NG on 24 SpCas9-NG comp. NG on 24
rs387906889	AFG3L2	10939	pathogenic.likely-pathogenic		TATTTACCAAAAGAACAATACCTCT<A>TACCAAAGAGCAGCTCTTGGATAGG	T	From A to T											LbCas12a & AsCas12a TTTV on 24	SpCas9-NG comp. NANG on 24			SpCas9-NRRH comp. NRRH on 23						FnCas12a TTV on 25
rs151344514	AFG3L2	10939	pathogenic		TATTTTTCAGATTGTTCAGTTTGGC<A>TGAATGAAAAGGTTGGGCAAATCTC	T	From A to T										CjCas9 comp. NNNVRYM on 22					SpCas9-NRRH comp. NRRH on 24					enAsCas12a VTTV on 24	FnCas12a TTV on 25
rs1064795281	AFG3L2	10939	likely-pathogenic		GTTTTTGGAGATGTTCGTTGGTGTG<G>GCCCTGCTAGAGTGAGTCTCATTCT	A	From G to A			EQR SpCas9 NGAG on 23	VQR SpCas9 NGAN on 23									SpCas9 (From Strep. past.) NNGTGA on 20
rs151344518	AFG3L2	10939	pathogenic	Spinocerebellar ataxia 28 (SCA28)	CAGTTTGGCATGAATGAAAAGGTTG<G>GCAAATCTCCTTTGACCTCCCACGT	A	From G to A			EQR SpCas9 NGAG on 23	VQR SpCas9 NGAN on 23
rs1005670966	AFG3L2	10939	likely-pathogenic		GGCAAGAAAACTGGCATCTTTAACT<C>CAGGGTTTTCAGGTGAGTGGAAAAT	T	From C to T				VQR SpCas9 comp. NGAN on 23																enAsCas12a VTTV on 23	FnCas12a TTV on 24		enAsCas12a TTCN on 24 Cas12e (CasX) TTCN on 24
rs151344512	AFG3L2	10939	uncertain-significance.pathogenic	Spinocerebellar ataxia 28 (SCA28)	CAGAGTGAGCAGGAGAACACACTCA<A>CCAGCTGCTGGTGGAGATGGATGGT	C	From A to C	SpCas9 comp. NGG on 23				SaCas9 comp. NNGRRT on 21	KKH SaCas9 comp. NNNRRT on 21				CjCas9 NNNVRYM on 20			SpCas9 (From Strep. past.) comp. NNGTGA on 23		SpCas9-NRRH comp. NRRH on 23	SpCas9-NRCH NRCH on 23								SpCas9-NRRH comp. NGGN on 23 SpCas9-NRCH comp. NGGN on 23	xCas9 comp. NG on 24 SpCas9-NG comp. NG on 24		St3Cas9 comp. NGGNG on 23
rs151344522	AFG3L2	10939	pathogenic	Spinocerebellar ataxia 28 (SCA28)	AGCCACTGCAAGATTGATAGATGAT<G>AAGTACGAATACTTATTAATGATGC	A	From G to A										CjCas9 NNNVRYM on 19	LbCas12a & AsCas12a comp. TTTV on 23						AsCas12a RVR comp. TATV on 25				FnCas12a comp. TTV on 24					SpCas9-NRTH NRTH on 22
rs727502823	AFG3L2	10939	pathogenic	Spastic ataxia 5. autosomal recessive (SPAX5)	CCAAAGAGCAGCTCTTGGATAGGAT<G>TGTATGACTTTAGGTGGTCGAGTCT	A	From G to A										CjCas9 NNNVRYM on 19							AsCas12a RVR TATV on 24 AsCas12a RVR comp. TATV on 25									SpCas9-NRTH NRTH on 22 SpCas9-NRTH comp. NRTH on 23
rs151344521	AFG3L2	10939	pathogenic	Spinocerebellar ataxia 28 (SCA28)	GAGAAACCTTACAGTGAAGCCACTG<C>AAGATTGATAGATGATGAAGTACGA	A	From C to A				VQR SpCas9 NGAN on 23							LbCas12a & AsCas12a comp. TTTV on 23				SpCas9-NRRH NRRH on 23 SpCas9-NRRH NRRH on 24			AsCas12a RR comp. TYCV on 24			FnCas12a comp. TTV on 24		enAsCas12a comp. TTCN on 24 Cas12e (CasX) comp. TTCN on 24
rs139469785	AFG3L2	10939	likely-pathogenic		TCTTCTCACAGAAAAGAAAGCTGAC<G>TGGAGAAGGTAGGTGCCAGTTGTGG	A	From G to A										CjCas9 NNNVRYM on 19						SpCas9-NRCH NRCH on 22			enAsCas12a comp. TGTV on 25
rs151344513	AFG3L2	10939	pathogenic	Spinocerebellar ataxia 28 (SCA28)	GCTCAAGATGACTTGAGAAAAGTAA<C>TCAGAGTGCATATGCCCAAGTGAGT	T	From C to T						KKH SaCas9 NNNRRT on 20									SpCas9-NRRH comp. NRRH on 22			AsCas12a RR TYCV on 25		enAsCas12a VTTV on 24	FnCas12a TTV on 25		enAsCas12a TTCN on 25 Cas12e (CasX) TTCN on 25			SpCas9-NRTH NRTH on 23
[truncated: 37,871 more rows]
